# Supplementary material for: Regulation of Neurogenesis by FGF Signaling and Neurogenin in the Invertebrate Chordate Ciona
Source: Front Cell Dev Biol. 2020 Jun 23;8:477. doi: 10.3389/fcell.2020.00477 (PMC7324659; doi:10.3389/fcell.2020.00477)
Supplement: Supplementary file 1 [file Data_Sheet_1.xlsx]

## Sheet: ANISEED_ID_etc_Query
KH ID	UniqueName	Top3 BLAST hits in human	ANISEED ID	logCPM	logFC Neurog vs. lacZ	Pvalue Neurog vs. lacZ	logFC NeurogWRPW vs. lacZ	Pvalue NeurogWRPW vs. lacZ	ISH?	ISH URL	ANISEED URL	GHOST URL
KH.L171.13	KH2013:KH.L171.13_RH2/3/4/5/6/7	OPN1LW; OPN1MW2; OPN1MW3	Cirobu.g00011841	6.89705	5.48624	0.000208963	-2.65568	0.0434374	17	https://www.aniseed.cnrs.fr/aniseed/gene/show_expression?unique_id=Cirobu.g00011841	https://www.aniseed.cnrs.fr/aniseed/gene/show_gene?unique_id=Cirobu.g00011841	http://ghost.zool.kyoto-u.ac.jp/cgi-bin/fordetailkh21.cgi?name=KH.L171.13;source=kh2013
KH.C6.129	HLH-4	NEUROG1; NEUROG2; NEUROG3	Cirobu.g00007646	10.4567	5.14325	2.13e-23	0.41755	0.337062	56	https://www.aniseed.cnrs.fr/aniseed/gene/show_expression?unique_id=Cirobu.g00007646	https://www.aniseed.cnrs.fr/aniseed/gene/show_gene?unique_id=Cirobu.g00007646	http://ghost.zool.kyoto-u.ac.jp/cgi-bin/fordetailkh21.cgi?name=KH.C6.129;source=kh2013
KH.C11.353	KH2013:KH.C11.353	KH.C11.353	Cirobu.g00002179	5.37381	4.87925	8.48e-08	-2.14944	0.00961031	0	https://www.aniseed.cnrs.fr/aniseed/gene/show_expression?unique_id=Cirobu.g00002179	https://www.aniseed.cnrs.fr/aniseed/gene/show_gene?unique_id=Cirobu.g00002179	http://ghost.zool.kyoto-u.ac.jp/cgi-bin/fordetailkh21.cgi?name=KH.C11.353;source=kh2013
KH.S618.6	GALA_CHICK	KH.S618.6	Cirobu.g00014834	2.78668	4.85196	2.31e-05	-1.5915	0.184071	5	https://www.aniseed.cnrs.fr/aniseed/gene/show_expression?unique_id=Cirobu.g00014834	https://www.aniseed.cnrs.fr/aniseed/gene/show_gene?unique_id=Cirobu.g00014834	http://ghost.zool.kyoto-u.ac.jp/cgi-bin/fordetailkh21.cgi?name=KH.S618.6;source=kh2013
KH.L105.1	SOR1/2	ADH1A; ADH5; SORD	Cirobu.g00010565	4.60215	4.7334	1.25e-16	-0.183211	0.780376	0	https://www.aniseed.cnrs.fr/aniseed/gene/show_expression?unique_id=Cirobu.g00010565	https://www.aniseed.cnrs.fr/aniseed/gene/show_gene?unique_id=Cirobu.g00010565	http://ghost.zool.kyoto-u.ac.jp/cgi-bin/fordetailkh21.cgi?name=KH.L105.1;source=kh2013
KH.C1.236	KH2013:KH.C1.236	CD209; CLEC17A; CLEC4E	Cirobu.g00000455	1.54158	4.58482	0.000175572	1.02144	0.439099	0	https://www.aniseed.cnrs.fr/aniseed/gene/show_expression?unique_id=Cirobu.g00000455	https://www.aniseed.cnrs.fr/aniseed/gene/show_gene?unique_id=Cirobu.g00000455	http://ghost.zool.kyoto-u.ac.jp/cgi-bin/fordetailkh21.cgi?name=KH.C1.236;source=kh2013
KH.L10.32	SI:CH211-69E5.1	NOTCH1; NOTCH2; NOTCH3	Cirobu.g00010523	2.94668	4.47616	0.00384492	-0.566495	0.684255	0	https://www.aniseed.cnrs.fr/aniseed/gene/show_expression?unique_id=Cirobu.g00010523	https://www.aniseed.cnrs.fr/aniseed/gene/show_gene?unique_id=Cirobu.g00010523	http://ghost.zool.kyoto-u.ac.jp/cgi-bin/fordetailkh21.cgi?name=KH.L10.32;source=kh2013
KH.C2.136	KH2013:KH.C2.136_AGP1/2/3	SLC7A1; SLC7A2; SLC7A4	Cirobu.g00004306	3.88649	4.36555	0.000271395	1.33823	0.219141	0	https://www.aniseed.cnrs.fr/aniseed/gene/show_expression?unique_id=Cirobu.g00004306	https://www.aniseed.cnrs.fr/aniseed/gene/show_gene?unique_id=Cirobu.g00004306	http://ghost.zool.kyoto-u.ac.jp/cgi-bin/fordetailkh21.cgi?name=KH.C2.136;source=kh2013
KH.C1.106	KH2013:KH.C1.106_QDR1/2/3	SLC22A1; SLC22A4; SLC22A5	Cirobu.g00000069	2.50907	4.36468	0.00944137	0.83959	0.60496	0	https://www.aniseed.cnrs.fr/aniseed/gene/show_expression?unique_id=Cirobu.g00000069	https://www.aniseed.cnrs.fr/aniseed/gene/show_gene?unique_id=Cirobu.g00000069	http://ghost.zool.kyoto-u.ac.jp/cgi-bin/fordetailkh21.cgi?name=KH.C1.106;source=kh2013
KH.C7.272	HPCAL4	HPCAL1; HPCAL4; VSNL1	Cirobu.g00008103	3.66557	4.28467	0.000146953	-1.47326	0.15574	0	https://www.aniseed.cnrs.fr/aniseed/gene/show_expression?unique_id=Cirobu.g00008103	https://www.aniseed.cnrs.fr/aniseed/gene/show_gene?unique_id=Cirobu.g00008103	http://ghost.zool.kyoto-u.ac.jp/cgi-bin/fordetailkh21.cgi?name=KH.C7.272;source=kh2013
KH.S1555.3	KH2013:KH.S1555.3	KH.S1555.3	Cirobu.g00013951	3.09969	4.23601	3.77e-05	0.428266	0.635897	0	https://www.aniseed.cnrs.fr/aniseed/gene/show_expression?unique_id=Cirobu.g00013951	https://www.aniseed.cnrs.fr/aniseed/gene/show_gene?unique_id=Cirobu.g00013951	http://ghost.zool.kyoto-u.ac.jp/cgi-bin/fordetailkh21.cgi?name=KH.S1555.3;source=kh2013
KH.C7.343	VSNL1	HPCAL1; HPCAL4; VSNL1	Cirobu.g00008181	2.81343	4.20126	4.08e-07	0.0889175	1	0	https://www.aniseed.cnrs.fr/aniseed/gene/show_expression?unique_id=Cirobu.g00008181	https://www.aniseed.cnrs.fr/aniseed/gene/show_gene?unique_id=Cirobu.g00008181	http://ghost.zool.kyoto-u.ac.jp/cgi-bin/fordetailkh21.cgi?name=KH.C7.343;source=kh2013
KH.C8.471	KH2013:KH.C8.471	KH.C8.471	Cirobu.g00009109	1.91838	4.14047	0.000102957	2.51093	0.0143128	0	https://www.aniseed.cnrs.fr/aniseed/gene/show_expression?unique_id=Cirobu.g00009109	https://www.aniseed.cnrs.fr/aniseed/gene/show_gene?unique_id=Cirobu.g00009109	http://ghost.zool.kyoto-u.ac.jp/cgi-bin/fordetailkh21.cgi?name=KH.C8.471;source=kh2013
KH.C3.635	CALCR	CALCR; CALCRL; PTH1R	Cirobu.g00005830	4.34414	4.11556	6.94e-05	-0.389557	0.681046	0	https://www.aniseed.cnrs.fr/aniseed/gene/show_expression?unique_id=Cirobu.g00005830	https://www.aniseed.cnrs.fr/aniseed/gene/show_gene?unique_id=Cirobu.g00005830	http://ghost.zool.kyoto-u.ac.jp/cgi-bin/fordetailkh21.cgi?name=KH.C3.635;source=kh2013
KH.C12.152	NUB	PAX6; RAX; RAX2	Cirobu.g00002680	5.39274	4.03208	0.00818106	-1.16096	0.403041	26	https://www.aniseed.cnrs.fr/aniseed/gene/show_expression?unique_id=Cirobu.g00002680	https://www.aniseed.cnrs.fr/aniseed/gene/show_gene?unique_id=Cirobu.g00002680	http://ghost.zool.kyoto-u.ac.jp/cgi-bin/fordetailkh21.cgi?name=KH.C12.152;source=kh2013
KH.S2542.1	KH2013:KH.S2542.1	KH.S2542.1	Cirobu.g00014266	3.34479	4.02253	5.33e-06	-0.616452	0.508538	0	https://www.aniseed.cnrs.fr/aniseed/gene/show_expression?unique_id=Cirobu.g00014266	https://www.aniseed.cnrs.fr/aniseed/gene/show_gene?unique_id=Cirobu.g00014266	http://ghost.zool.kyoto-u.ac.jp/cgi-bin/fordetailkh21.cgi?name=KH.S2542.1;source=kh2013
KH.C3.315	KH2013:KH.C3.315	KH.C3.315	Cirobu.g00005486	3.32778	4.01392	1.15e-09	0.746995	0.24149	0	https://www.aniseed.cnrs.fr/aniseed/gene/show_expression?unique_id=Cirobu.g00005486	https://www.aniseed.cnrs.fr/aniseed/gene/show_gene?unique_id=Cirobu.g00005486	http://ghost.zool.kyoto-u.ac.jp/cgi-bin/fordetailkh21.cgi?name=KH.C3.315;source=kh2013
KH.C14.253	KH2013:KH.C14.253_TFF1	TFF1; TFF2	Cirobu.g00003674	3.462	3.78548	5.51e-10	-0.412795	0.511691	0	https://www.aniseed.cnrs.fr/aniseed/gene/show_expression?unique_id=Cirobu.g00003674	https://www.aniseed.cnrs.fr/aniseed/gene/show_gene?unique_id=Cirobu.g00003674	http://ghost.zool.kyoto-u.ac.jp/cgi-bin/fordetailkh21.cgi?name=KH.C14.253;source=kh2013
KH.C4.649	NHLH1/2	NHLH1; NHLH2; TAL2	Cirobu.g00006758	5.77402	3.69483	5.34e-05	-2.29827	0.0082604	0	https://www.aniseed.cnrs.fr/aniseed/gene/show_expression?unique_id=Cirobu.g00006758	https://www.aniseed.cnrs.fr/aniseed/gene/show_gene?unique_id=Cirobu.g00006758	http://ghost.zool.kyoto-u.ac.jp/cgi-bin/fordetailkh21.cgi?name=KH.C4.649;source=kh2013
KH.C9.788	KH2013:KH.C9.788_ITGA6B	ITGA2; ITGA5; ITGA8	Cirobu.g00010369	1.84834	3.64281	0.000692765	0.65813	0.547945	0	https://www.aniseed.cnrs.fr/aniseed/gene/show_expression?unique_id=Cirobu.g00010369	https://www.aniseed.cnrs.fr/aniseed/gene/show_gene?unique_id=Cirobu.g00010369	http://ghost.zool.kyoto-u.ac.jp/cgi-bin/fordetailkh21.cgi?name=KH.C9.788;source=kh2013
KH.C1.84	KH2013:KH.C1.84	KH.C1.84	Cirobu.g00001118	2.23994	3.60275	0.000815519	-2.30889	0.0403564	1	https://www.aniseed.cnrs.fr/aniseed/gene/show_expression?unique_id=Cirobu.g00001118	https://www.aniseed.cnrs.fr/aniseed/gene/show_gene?unique_id=Cirobu.g00001118	http://ghost.zool.kyoto-u.ac.jp/cgi-bin/fordetailkh21.cgi?name=KH.C1.84;source=kh2013
KH.C9.352	ANKRD33B	ANKRD33; ANKRD33B; ESPNL	Cirobu.g00009889	4.25004	3.59006	4.17e-07	-1.09647	0.128658	0	https://www.aniseed.cnrs.fr/aniseed/gene/show_expression?unique_id=Cirobu.g00009889	https://www.aniseed.cnrs.fr/aniseed/gene/show_gene?unique_id=Cirobu.g00009889	http://ghost.zool.kyoto-u.ac.jp/cgi-bin/fordetailkh21.cgi?name=KH.C9.352;source=kh2013
KH.L141.22	AOAH	AOAH; PSAP; PSAPL1	Cirobu.g00011175	1.99831	3.58902	0.00484967	-0.494155	0.671386	0	https://www.aniseed.cnrs.fr/aniseed/gene/show_expression?unique_id=Cirobu.g00011175	https://www.aniseed.cnrs.fr/aniseed/gene/show_gene?unique_id=Cirobu.g00011175	http://ghost.zool.kyoto-u.ac.jp/cgi-bin/fordetailkh21.cgi?name=KH.L141.22;source=kh2013
KH.C7.131	ADRA2C	ADRA2A; ADRA2B; DRD2	Cirobu.g00007952	5.10341	3.56293	0.000102148	-2.77859	0.00204542	2	https://www.aniseed.cnrs.fr/aniseed/gene/show_expression?unique_id=Cirobu.g00007952	https://www.aniseed.cnrs.fr/aniseed/gene/show_gene?unique_id=Cirobu.g00007952	http://ghost.zool.kyoto-u.ac.jp/cgi-bin/fordetailkh21.cgi?name=KH.C7.131;source=kh2013
KH.C9.375	KH2013:KH.C9.375_LRRD1	LRRD1; LRRIQ4; SHOC2	Cirobu.g00009914	4.42806	3.50417	0.00184359	-1.65936	0.122788	0	https://www.aniseed.cnrs.fr/aniseed/gene/show_expression?unique_id=Cirobu.g00009914	https://www.aniseed.cnrs.fr/aniseed/gene/show_gene?unique_id=Cirobu.g00009914	http://ghost.zool.kyoto-u.ac.jp/cgi-bin/fordetailkh21.cgi?name=KH.C9.375;source=kh2013
KH.C2.674	GCY-32/34/35/36/37	GUCY1A1; GUCY1A2; GUCY1B1	Cirobu.g00004896	6.70277	3.46049	0.000471879	-0.967169	0.289114	0	https://www.aniseed.cnrs.fr/aniseed/gene/show_expression?unique_id=Cirobu.g00004896	https://www.aniseed.cnrs.fr/aniseed/gene/show_gene?unique_id=Cirobu.g00004896	http://ghost.zool.kyoto-u.ac.jp/cgi-bin/fordetailkh21.cgi?name=KH.C2.674;source=kh2013
KH.S595.17	KH2013:KH.S595.17	KH.S595.17	Cirobu.g00014764	1.21854	3.42974	0.0403535	4.6938	0.00732736	0	https://www.aniseed.cnrs.fr/aniseed/gene/show_expression?unique_id=Cirobu.g00014764	https://www.aniseed.cnrs.fr/aniseed/gene/show_gene?unique_id=Cirobu.g00014764	http://ghost.zool.kyoto-u.ac.jp/cgi-bin/fordetailkh21.cgi?name=KH.S595.17;source=kh2013
KH.S679.3	IGCM-1	HMCN1; IGSF10; MXRA5	Cirobu.g00014914	5.70241	3.33812	8.77e-09	-0.493823	0.361098	2	https://www.aniseed.cnrs.fr/aniseed/gene/show_expression?unique_id=Cirobu.g00014914	https://www.aniseed.cnrs.fr/aniseed/gene/show_gene?unique_id=Cirobu.g00014914	http://ghost.zool.kyoto-u.ac.jp/cgi-bin/fordetailkh21.cgi?name=KH.S679.3;source=kh2013
KH.S2542.2	KH2013:KH.S2542.2	KH.S2542.2	Cirobu.g00014267	1.58792	3.32833	0.000192155	0.157474	0.894138	0	https://www.aniseed.cnrs.fr/aniseed/gene/show_expression?unique_id=Cirobu.g00014267	https://www.aniseed.cnrs.fr/aniseed/gene/show_gene?unique_id=Cirobu.g00014267	http://ghost.zool.kyoto-u.ac.jp/cgi-bin/fordetailkh21.cgi?name=KH.S2542.2;source=kh2013
KH.C14.70	FGF20	FGF20; FGF5; FGF7	Cirobu.g00004079	3.73329	3.30735	8.74e-09	-0.287157	0.638154	12	https://www.aniseed.cnrs.fr/aniseed/gene/show_expression?unique_id=Cirobu.g00004079	https://www.aniseed.cnrs.fr/aniseed/gene/show_gene?unique_id=Cirobu.g00004079	http://ghost.zool.kyoto-u.ac.jp/cgi-bin/fordetailkh21.cgi?name=KH.C14.70;source=kh2013
KH.C14.470	KH2013:KH.C14.470	KH.C14.470	Cirobu.g00003908	4.03271	3.29828	0.0489025	-2.62349	0.107114	0	https://www.aniseed.cnrs.fr/aniseed/gene/show_expression?unique_id=Cirobu.g00003908	https://www.aniseed.cnrs.fr/aniseed/gene/show_gene?unique_id=Cirobu.g00003908	http://ghost.zool.kyoto-u.ac.jp/cgi-bin/fordetailkh21.cgi?name=KH.C14.470;source=kh2013
KH.C1.521	KH2013:KH.C1.521_LRP1B	LRP1; LRP1B; RXFP1	Cirobu.g00000769	4.59786	3.26428	0.0441766	-1.06049	0.485459	0	https://www.aniseed.cnrs.fr/aniseed/gene/show_expression?unique_id=Cirobu.g00000769	https://www.aniseed.cnrs.fr/aniseed/gene/show_gene?unique_id=Cirobu.g00000769	http://ghost.zool.kyoto-u.ac.jp/cgi-bin/fordetailkh21.cgi?name=KH.C1.521;source=kh2013
KH.C1.54	KH2013:KH.C1.54_CG7381	LTBP4; NOTCH1; NOTCH2	Cirobu.g00000788	6.29208	3.20624	8.29e-05	-1.27717	0.0947503	0	https://www.aniseed.cnrs.fr/aniseed/gene/show_expression?unique_id=Cirobu.g00000788	https://www.aniseed.cnrs.fr/aniseed/gene/show_gene?unique_id=Cirobu.g00000788	http://ghost.zool.kyoto-u.ac.jp/cgi-bin/fordetailkh21.cgi?name=KH.C1.54;source=kh2013
KH.C1.381	KH2013:KH.C1.381_WBSCR27	METTL27; NDUFAF5	Cirobu.g00000616	1.91159	3.20002	1.79e-06	0.338182	0.670078	0	https://www.aniseed.cnrs.fr/aniseed/gene/show_expression?unique_id=Cirobu.g00000616	https://www.aniseed.cnrs.fr/aniseed/gene/show_gene?unique_id=Cirobu.g00000616	http://ghost.zool.kyoto-u.ac.jp/cgi-bin/fordetailkh21.cgi?name=KH.C1.381;source=kh2013
KH.C1.515	RAB12	RAB10; RAB12; RAB8A	Cirobu.g00000762	4.47402	3.17574	0.0108986	-2.12924	0.0781037	0	https://www.aniseed.cnrs.fr/aniseed/gene/show_expression?unique_id=Cirobu.g00000762	https://www.aniseed.cnrs.fr/aniseed/gene/show_gene?unique_id=Cirobu.g00000762	http://ghost.zool.kyoto-u.ac.jp/cgi-bin/fordetailkh21.cgi?name=KH.C1.515;source=kh2013
KH.L53.21	GPR113	ADGRD1; ADGRE2; ADGRF3	Cirobu.g00012773	2.34357	3.16132	0.000308594	-1.16654	0.204782	0	https://www.aniseed.cnrs.fr/aniseed/gene/show_expression?unique_id=Cirobu.g00012773	https://www.aniseed.cnrs.fr/aniseed/gene/show_gene?unique_id=Cirobu.g00012773	http://ghost.zool.kyoto-u.ac.jp/cgi-bin/fordetailkh21.cgi?name=KH.L53.21;source=kh2013
KH.C1.467	NPR-9	AGTR1; OPRM1; RXFP3	Cirobu.g00000709	5.82287	3.12629	0.00124967	-1.45038	0.112264	0	https://www.aniseed.cnrs.fr/aniseed/gene/show_expression?unique_id=Cirobu.g00000709	https://www.aniseed.cnrs.fr/aniseed/gene/show_gene?unique_id=Cirobu.g00000709	http://ghost.zool.kyoto-u.ac.jp/cgi-bin/fordetailkh21.cgi?name=KH.C1.467;source=kh2013
KH.S852.6	KH2013:KH.S852.6	KH.S852.6	Cirobu.g00015123	6.0835	3.10385	6.09e-07	-1.16021	0.0480169	0	https://www.aniseed.cnrs.fr/aniseed/gene/show_expression?unique_id=Cirobu.g00015123	https://www.aniseed.cnrs.fr/aniseed/gene/show_gene?unique_id=Cirobu.g00015123	http://ghost.zool.kyoto-u.ac.jp/cgi-bin/fordetailkh21.cgi?name=KH.S852.6;source=kh2013
KH.C2.307	DPYSL2/3	CRMP1; DPYSL2; DPYSL3	Cirobu.g00004493	4.119	3.10279	1.34e-08	-0.332618	0.557557	0	https://www.aniseed.cnrs.fr/aniseed/gene/show_expression?unique_id=Cirobu.g00004493	https://www.aniseed.cnrs.fr/aniseed/gene/show_gene?unique_id=Cirobu.g00004493	http://ghost.zool.kyoto-u.ac.jp/cgi-bin/fordetailkh21.cgi?name=KH.C2.307;source=kh2013
KH.C3.535	KH2013:KH.C3.535_MFSD7	FLVCR1; FLVCR2; SLC49A3	Cirobu.g00005722	2.8929	3.10099	0.000565235	-0.18364	0.854006	0	https://www.aniseed.cnrs.fr/aniseed/gene/show_expression?unique_id=Cirobu.g00005722	https://www.aniseed.cnrs.fr/aniseed/gene/show_gene?unique_id=Cirobu.g00005722	http://ghost.zool.kyoto-u.ac.jp/cgi-bin/fordetailkh21.cgi?name=KH.C3.535;source=kh2013
KH.C9.353	GRIN3B	GRIN2A; GRIN2B; GRIN2C	Cirobu.g00009890	2.3994	3.0971	0.00154857	-0.0378586	0.973876	0	https://www.aniseed.cnrs.fr/aniseed/gene/show_expression?unique_id=Cirobu.g00009890	https://www.aniseed.cnrs.fr/aniseed/gene/show_gene?unique_id=Cirobu.g00009890	http://ghost.zool.kyoto-u.ac.jp/cgi-bin/fordetailkh21.cgi?name=KH.C9.353;source=kh2013
KH.C1.731	ECEL1	ECE1; ECE2; ECEL1	Cirobu.g00000999	5.98427	3.09493	9.69e-12	-0.678741	0.115057	0	https://www.aniseed.cnrs.fr/aniseed/gene/show_expression?unique_id=Cirobu.g00000999	https://www.aniseed.cnrs.fr/aniseed/gene/show_gene?unique_id=Cirobu.g00000999	http://ghost.zool.kyoto-u.ac.jp/cgi-bin/fordetailkh21.cgi?name=KH.C1.731;source=kh2013
KH.C1.1067	FRQ1/2	HPCA; HPCAL1; NCS1	Cirobu.g00000077	6.15737	3.07621	0.000115681	-2.66791	0.000751167	0	https://www.aniseed.cnrs.fr/aniseed/gene/show_expression?unique_id=Cirobu.g00000077	https://www.aniseed.cnrs.fr/aniseed/gene/show_gene?unique_id=Cirobu.g00000077	http://ghost.zool.kyoto-u.ac.jp/cgi-bin/fordetailkh21.cgi?name=KH.C1.1067;source=kh2013
KH.L153.48	KH2013:KH.L153.48_WBSCR27	METTL27	Cirobu.g00011497	2.06009	3.05713	2.94e-05	-0.715312	0.400733	0	https://www.aniseed.cnrs.fr/aniseed/gene/show_expression?unique_id=Cirobu.g00011497	https://www.aniseed.cnrs.fr/aniseed/gene/show_gene?unique_id=Cirobu.g00011497	http://ghost.zool.kyoto-u.ac.jp/cgi-bin/fordetailkh21.cgi?name=KH.L153.48;source=kh2013
KH.L18.65	PDE2	PDE11A; PDE6B; PDE6C	Cirobu.g00012005	7.20546	3.05012	3.7e-09	-0.0782625	0.869962	3	https://www.aniseed.cnrs.fr/aniseed/gene/show_expression?unique_id=Cirobu.g00012005	https://www.aniseed.cnrs.fr/aniseed/gene/show_gene?unique_id=Cirobu.g00012005	http://ghost.zool.kyoto-u.ac.jp/cgi-bin/fordetailkh21.cgi?name=KH.L18.65;source=kh2013
KH.L18.91	GUCY2F	GUCY2D; GUCY2F; NPR2	Cirobu.g00012034	3.68606	3.04786	0.0104839	-0.666748	0.553254	0	https://www.aniseed.cnrs.fr/aniseed/gene/show_expression?unique_id=Cirobu.g00012034	https://www.aniseed.cnrs.fr/aniseed/gene/show_gene?unique_id=Cirobu.g00012034	http://ghost.zool.kyoto-u.ac.jp/cgi-bin/fordetailkh21.cgi?name=KH.L18.91;source=kh2013
KH.L128.2	PCSK2	FURIN; PCSK1; PCSK2	Cirobu.g00010959	6.00514	3.01421	0.0231269	-2.79467	0.034424	8	https://www.aniseed.cnrs.fr/aniseed/gene/show_expression?unique_id=Cirobu.g00010959	https://www.aniseed.cnrs.fr/aniseed/gene/show_gene?unique_id=Cirobu.g00010959	http://ghost.zool.kyoto-u.ac.jp/cgi-bin/fordetailkh21.cgi?name=KH.L128.2;source=kh2013
KH.C14.431	SLC10A4	SLC10A1; SLC10A2; SLC10A4	Cirobu.g00003865	6.45256	2.99636	0.0546815	-1.72717	0.247288	0	https://www.aniseed.cnrs.fr/aniseed/gene/show_expression?unique_id=Cirobu.g00003865	https://www.aniseed.cnrs.fr/aniseed/gene/show_gene?unique_id=Cirobu.g00003865	http://ghost.zool.kyoto-u.ac.jp/cgi-bin/fordetailkh21.cgi?name=KH.C14.431;source=kh2013
KH.C9.860	GABRB1/2/3	GABRB1; GABRB2; GABRB3	Cirobu.g00010449	4.10528	2.97376	0.0215026	-2.51022	0.0487225	0	https://www.aniseed.cnrs.fr/aniseed/gene/show_expression?unique_id=Cirobu.g00010449	https://www.aniseed.cnrs.fr/aniseed/gene/show_gene?unique_id=Cirobu.g00010449	http://ghost.zool.kyoto-u.ac.jp/cgi-bin/fordetailkh21.cgi?name=KH.C9.860;source=kh2013
KH.C1.498	SLC18A1/2/3	CHAT; CPT2; CRAT	Cirobu.g00000742	5.80017	2.97077	0.112285	-1.13728	0.52097	62	https://www.aniseed.cnrs.fr/aniseed/gene/show_expression?unique_id=Cirobu.g00000742	https://www.aniseed.cnrs.fr/aniseed/gene/show_gene?unique_id=Cirobu.g00000742	http://ghost.zool.kyoto-u.ac.jp/cgi-bin/fordetailkh21.cgi?name=KH.C1.498;source=kh2013
KH.L37.40	KH2013:KH.L37.40	TMEM200A; TMEM200C	Cirobu.g00012404	1.42571	2.96908	0.0102976	-3.042	0.0253329	0	https://www.aniseed.cnrs.fr/aniseed/gene/show_expression?unique_id=Cirobu.g00012404	https://www.aniseed.cnrs.fr/aniseed/gene/show_gene?unique_id=Cirobu.g00012404	http://ghost.zool.kyoto-u.ac.jp/cgi-bin/fordetailkh21.cgi?name=KH.L37.40;source=kh2013
KH.C6.179	KH2013:KH.C6.179	KH.C6.179	Cirobu.g00007701	3.1393	2.96768	5.22e-07	-0.257547	0.665712	0	https://www.aniseed.cnrs.fr/aniseed/gene/show_expression?unique_id=Cirobu.g00007701	https://www.aniseed.cnrs.fr/aniseed/gene/show_gene?unique_id=Cirobu.g00007701	http://ghost.zool.kyoto-u.ac.jp/cgi-bin/fordetailkh21.cgi?name=KH.C6.179;source=kh2013
KH.C1.208	TEX14	MAP3K11; MAP3K12; TEX14	Cirobu.g00000424	0.524779	2.96466	0.0643392	1.1676	0.484883	0	https://www.aniseed.cnrs.fr/aniseed/gene/show_expression?unique_id=Cirobu.g00000424	https://www.aniseed.cnrs.fr/aniseed/gene/show_gene?unique_id=Cirobu.g00000424	http://ghost.zool.kyoto-u.ac.jp/cgi-bin/fordetailkh21.cgi?name=KH.C1.208;source=kh2013
KH.C5.594	KH2013:KH.C5.594	KH.C5.594	Cirobu.g00007495	1.45302	2.95148	0.00939655	-1.24581	0.275951	0	https://www.aniseed.cnrs.fr/aniseed/gene/show_expression?unique_id=Cirobu.g00007495	https://www.aniseed.cnrs.fr/aniseed/gene/show_gene?unique_id=Cirobu.g00007495	http://ghost.zool.kyoto-u.ac.jp/cgi-bin/fordetailkh21.cgi?name=KH.C5.594;source=kh2013
KH.C1.396	ZGC:195224	AL096711.2; MTCL1; SOGA3	Cirobu.g00000632	7.34118	2.94157	0.000793676	-1.42246	0.087457	1	https://www.aniseed.cnrs.fr/aniseed/gene/show_expression?unique_id=Cirobu.g00000632	https://www.aniseed.cnrs.fr/aniseed/gene/show_gene?unique_id=Cirobu.g00000632	http://ghost.zool.kyoto-u.ac.jp/cgi-bin/fordetailkh21.cgi?name=KH.C1.396;source=kh2013
KH.C8.762	TGM1/4	TGM1; TGM4	Cirobu.g00009428	3.87986	2.93887	6.2e-06	-2.27355	0.000956082	0	https://www.aniseed.cnrs.fr/aniseed/gene/show_expression?unique_id=Cirobu.g00009428	https://www.aniseed.cnrs.fr/aniseed/gene/show_gene?unique_id=Cirobu.g00009428	http://ghost.zool.kyoto-u.ac.jp/cgi-bin/fordetailkh21.cgi?name=KH.C8.762;source=kh2013
KH.C9.65	DPP10/6	DPP10; DPP6	Cirobu.g00010217	6.43989	2.93494	0.00922157	-1.63844	0.128548	3	https://www.aniseed.cnrs.fr/aniseed/gene/show_expression?unique_id=Cirobu.g00010217	https://www.aniseed.cnrs.fr/aniseed/gene/show_gene?unique_id=Cirobu.g00010217	http://ghost.zool.kyoto-u.ac.jp/cgi-bin/fordetailkh21.cgi?name=KH.C9.65;source=kh2013
KH.C4.248	IGSF21	F11R; IGSF21; KIRREL3	Cirobu.g00006323	3.57801	2.93315	5.74e-07	-0.857919	0.132925	0	https://www.aniseed.cnrs.fr/aniseed/gene/show_expression?unique_id=Cirobu.g00006323	https://www.aniseed.cnrs.fr/aniseed/gene/show_gene?unique_id=Cirobu.g00006323	http://ghost.zool.kyoto-u.ac.jp/cgi-bin/fordetailkh21.cgi?name=KH.C4.248;source=kh2013
KH.C8.454	KH2013:KH.C8.454_NAS-30/33/36/37/38	ADGRB2; ADGRB3; HMCN1	Cirobu.g00009090	1.36311	2.93137	0.187759	0.889464	0.695049	0	https://www.aniseed.cnrs.fr/aniseed/gene/show_expression?unique_id=Cirobu.g00009090	https://www.aniseed.cnrs.fr/aniseed/gene/show_gene?unique_id=Cirobu.g00009090	http://ghost.zool.kyoto-u.ac.jp/cgi-bin/fordetailkh21.cgi?name=KH.C8.454;source=kh2013
KH.L71.18	RAB11B	RAB11A; RAB11B; RAB4A	Cirobu.g00013016	5.52643	2.92936	0.000656401	-1.96545	0.0184151	3	https://www.aniseed.cnrs.fr/aniseed/gene/show_expression?unique_id=Cirobu.g00013016	https://www.aniseed.cnrs.fr/aniseed/gene/show_gene?unique_id=Cirobu.g00013016	http://ghost.zool.kyoto-u.ac.jp/cgi-bin/fordetailkh21.cgi?name=KH.L71.18;source=kh2013
KH.S1075.1	YKR070W	HDHD5; PGP	Cirobu.g00013566	6.26377	2.91709	0.00299771	-1.92448	0.0423845	2	https://www.aniseed.cnrs.fr/aniseed/gene/show_expression?unique_id=Cirobu.g00013566	https://www.aniseed.cnrs.fr/aniseed/gene/show_gene?unique_id=Cirobu.g00013566	http://ghost.zool.kyoto-u.ac.jp/cgi-bin/fordetailkh21.cgi?name=KH.S1075.1;source=kh2013
KH.C10.445	KH2013:KH.C10.445	CACNG2; CACNG3; CACNG8	Cirobu.g00001666	2.44463	2.89836	0.019915	-2.16338	0.0773738	0	https://www.aniseed.cnrs.fr/aniseed/gene/show_expression?unique_id=Cirobu.g00001666	https://www.aniseed.cnrs.fr/aniseed/gene/show_gene?unique_id=Cirobu.g00001666	http://ghost.zool.kyoto-u.ac.jp/cgi-bin/fordetailkh21.cgi?name=KH.C10.445;source=kh2013
KH.C4.158	KH2013:KH.C4.158	KH.C4.158	Cirobu.g00006225	2.95578	2.89831	0.0027548	-1.39177	0.141147	0	https://www.aniseed.cnrs.fr/aniseed/gene/show_expression?unique_id=Cirobu.g00006225	https://www.aniseed.cnrs.fr/aniseed/gene/show_gene?unique_id=Cirobu.g00006225	http://ghost.zool.kyoto-u.ac.jp/cgi-bin/fordetailkh21.cgi?name=KH.C4.158;source=kh2013
KH.C5.117	F1NVL8_CHICK	AGTR1; GALR2; OPRM1	Cirobu.g00006976	5.72261	2.89558	0.00248973	-1.1789	0.194916	0	https://www.aniseed.cnrs.fr/aniseed/gene/show_expression?unique_id=Cirobu.g00006976	https://www.aniseed.cnrs.fr/aniseed/gene/show_gene?unique_id=Cirobu.g00006976	http://ghost.zool.kyoto-u.ac.jp/cgi-bin/fordetailkh21.cgi?name=KH.C5.117;source=kh2013
KH.C2.491	KH2013:KH.C2.491	KH.C2.491	Cirobu.g00004694	4.39926	2.88063	0.0850834	-2.69344	0.105233	0	https://www.aniseed.cnrs.fr/aniseed/gene/show_expression?unique_id=Cirobu.g00004694	https://www.aniseed.cnrs.fr/aniseed/gene/show_gene?unique_id=Cirobu.g00004694	http://ghost.zool.kyoto-u.ac.jp/cgi-bin/fordetailkh21.cgi?name=KH.C2.491;source=kh2013
KH.C10.182	KH2013:KH.C10.182	CLDN1; CLDN19; CLDN7	Cirobu.g00001382	2.79843	2.83895	0.0414109	-1.63168	0.22477	0	https://www.aniseed.cnrs.fr/aniseed/gene/show_expression?unique_id=Cirobu.g00001382	https://www.aniseed.cnrs.fr/aniseed/gene/show_gene?unique_id=Cirobu.g00001382	http://ghost.zool.kyoto-u.ac.jp/cgi-bin/fordetailkh21.cgi?name=KH.C10.182;source=kh2013
KH.C14.139	GABRA1	GABRB1; GABRP; GLRA1	Cirobu.g00003549	3.31487	2.83181	0.000303828	-0.69156	0.358425	0	https://www.aniseed.cnrs.fr/aniseed/gene/show_expression?unique_id=Cirobu.g00003549	https://www.aniseed.cnrs.fr/aniseed/gene/show_gene?unique_id=Cirobu.g00003549	http://ghost.zool.kyoto-u.ac.jp/cgi-bin/fordetailkh21.cgi?name=KH.C14.139;source=kh2013
KH.C2.14	Ci-R1CiGC26c12	KH.C2.14	Cirobu.g00004310	5.5247	2.82454	0.0114282	-2.89507	0.0105103	12	https://www.aniseed.cnrs.fr/aniseed/gene/show_expression?unique_id=Cirobu.g00004310	https://www.aniseed.cnrs.fr/aniseed/gene/show_gene?unique_id=Cirobu.g00004310	http://ghost.zool.kyoto-u.ac.jp/cgi-bin/fordetailkh21.cgi?name=KH.C2.14;source=kh2013
KH.C1.1254	GABRD	GLRB	Cirobu.g00000282	5.93809	2.79631	6.08e-05	-1.31972	0.0484551	0	https://www.aniseed.cnrs.fr/aniseed/gene/show_expression?unique_id=Cirobu.g00000282	https://www.aniseed.cnrs.fr/aniseed/gene/show_gene?unique_id=Cirobu.g00000282	http://ghost.zool.kyoto-u.ac.jp/cgi-bin/fordetailkh21.cgi?name=KH.C1.1254;source=kh2013
KH.C1.204	KCNB1/2	KCNB1; KCNB2; KCNS3	Cirobu.g00000420	4.37242	2.77714	0.000746276	-1.24045	0.114484	1	https://www.aniseed.cnrs.fr/aniseed/gene/show_expression?unique_id=Cirobu.g00000420	https://www.aniseed.cnrs.fr/aniseed/gene/show_gene?unique_id=Cirobu.g00000420	http://ghost.zool.kyoto-u.ac.jp/cgi-bin/fordetailkh21.cgi?name=KH.C1.204;source=kh2013
KH.C10.553	KCNMB1/2/3/4	KCNMB2; KCNMB3; KCNMB4	Cirobu.g00001783	1.88053	2.77575	0.00213474	-0.249973	0.825876	0	https://www.aniseed.cnrs.fr/aniseed/gene/show_expression?unique_id=Cirobu.g00001783	https://www.aniseed.cnrs.fr/aniseed/gene/show_gene?unique_id=Cirobu.g00001783	http://ghost.zool.kyoto-u.ac.jp/cgi-bin/fordetailkh21.cgi?name=KH.C10.553;source=kh2013
KH.C2.539	KH2013:KH.C2.539	KH.C2.539	Cirobu.g00004747	0.943919	2.77149	0.0228336	-6.55483	0.00382418	0	https://www.aniseed.cnrs.fr/aniseed/gene/show_expression?unique_id=Cirobu.g00004747	https://www.aniseed.cnrs.fr/aniseed/gene/show_gene?unique_id=Cirobu.g00004747	http://ghost.zool.kyoto-u.ac.jp/cgi-bin/fordetailkh21.cgi?name=KH.C2.539;source=kh2013
KH.C13.97	CYR1	LGR4; LRRTM3; NYX	Cirobu.g00003502	4.11762	2.7707	0.000579269	-0.10802	0.886075	0	https://www.aniseed.cnrs.fr/aniseed/gene/show_expression?unique_id=Cirobu.g00003502	https://www.aniseed.cnrs.fr/aniseed/gene/show_gene?unique_id=Cirobu.g00003502	http://ghost.zool.kyoto-u.ac.jp/cgi-bin/fordetailkh21.cgi?name=KH.C13.97;source=kh2013
KH.C5.481	BSN	BSN; PCLO	Cirobu.g00007370	4.84355	2.75828	0.00318302	-2.06568	0.0244846	5	https://www.aniseed.cnrs.fr/aniseed/gene/show_expression?unique_id=Cirobu.g00007370	https://www.aniseed.cnrs.fr/aniseed/gene/show_gene?unique_id=Cirobu.g00007370	http://ghost.zool.kyoto-u.ac.jp/cgi-bin/fordetailkh21.cgi?name=KH.C5.481;source=kh2013
KH.C8.717	CPLX1/2	CPLX1; CPLX2	Cirobu.g00009378	5.83341	2.75752	1.42e-05	-0.785434	0.192078	11	https://www.aniseed.cnrs.fr/aniseed/gene/show_expression?unique_id=Cirobu.g00009378	https://www.aniseed.cnrs.fr/aniseed/gene/show_gene?unique_id=Cirobu.g00009378	http://ghost.zool.kyoto-u.ac.jp/cgi-bin/fordetailkh21.cgi?name=KH.C8.717;source=kh2013
KH.C4.78	SEL1L/2	KIAA0141; SEL1L; SEL1L2	Cirobu.g00006902	2.24506	2.74798	0.0593504	-0.590406	0.686336	0	https://www.aniseed.cnrs.fr/aniseed/gene/show_expression?unique_id=Cirobu.g00006902	https://www.aniseed.cnrs.fr/aniseed/gene/show_gene?unique_id=Cirobu.g00006902	http://ghost.zool.kyoto-u.ac.jp/cgi-bin/fordetailkh21.cgi?name=KH.C4.78;source=kh2013
KH.C8.830	GM1078	DCLK3; SBK1; SBK2	Cirobu.g00009503	1.86207	2.7459	0.00788311	-0.958955	0.324087	0	https://www.aniseed.cnrs.fr/aniseed/gene/show_expression?unique_id=Cirobu.g00009503	https://www.aniseed.cnrs.fr/aniseed/gene/show_gene?unique_id=Cirobu.g00009503	http://ghost.zool.kyoto-u.ac.jp/cgi-bin/fordetailkh21.cgi?name=KH.C8.830;source=kh2013
KH.C8.898	KH2013:KH.C8.898_CLEC-10/11/12/13/15/17/18	PRSS1; PRSS22	Cirobu.g00009576	-0.102216	2.74134	0.0976587	2.32355	0.179759	0	https://www.aniseed.cnrs.fr/aniseed/gene/show_expression?unique_id=Cirobu.g00009576	https://www.aniseed.cnrs.fr/aniseed/gene/show_gene?unique_id=Cirobu.g00009576	http://ghost.zool.kyoto-u.ac.jp/cgi-bin/fordetailkh21.cgi?name=KH.C8.898;source=kh2013
KH.S761.6	GAD1/2	CSAD; GAD1; GAD2	Cirobu.g00015008	7.35955	2.72109	0.0037309	-1.37299	0.12676	9	https://www.aniseed.cnrs.fr/aniseed/gene/show_expression?unique_id=Cirobu.g00015008	https://www.aniseed.cnrs.fr/aniseed/gene/show_gene?unique_id=Cirobu.g00015008	http://ghost.zool.kyoto-u.ac.jp/cgi-bin/fordetailkh21.cgi?name=KH.S761.6;source=kh2013
KH.L22.43	KH2013:KH.L22.43	KH.L22.43	Cirobu.g00012158	1.9296	2.7208	0.00109265	-1.30203	0.122839	0	https://www.aniseed.cnrs.fr/aniseed/gene/show_expression?unique_id=Cirobu.g00012158	https://www.aniseed.cnrs.fr/aniseed/gene/show_gene?unique_id=Cirobu.g00012158	http://ghost.zool.kyoto-u.ac.jp/cgi-bin/fordetailkh21.cgi?name=KH.L22.43;source=kh2013
KH.C5.437	KH2013:KH.C5.437	KH.C5.437	Cirobu.g00007321	2.73494	2.71	0.000194488	-0.706809	0.329934	4	https://www.aniseed.cnrs.fr/aniseed/gene/show_expression?unique_id=Cirobu.g00007321	https://www.aniseed.cnrs.fr/aniseed/gene/show_gene?unique_id=Cirobu.g00007321	http://ghost.zool.kyoto-u.ac.jp/cgi-bin/fordetailkh21.cgi?name=KH.C5.437;source=kh2013
KH.C2.757	TRPC3/6/7	TRPC3; TRPC6; TRPC7	Cirobu.g00004984	1.96046	2.70311	0.062578	-0.123589	0.939405	0	https://www.aniseed.cnrs.fr/aniseed/gene/show_expression?unique_id=Cirobu.g00004984	https://www.aniseed.cnrs.fr/aniseed/gene/show_gene?unique_id=Cirobu.g00004984	http://ghost.zool.kyoto-u.ac.jp/cgi-bin/fordetailkh21.cgi?name=KH.C2.757;source=kh2013
KH.S425.3	KH2013:KH.S425.3_THETATRY	CTRB1; CTRB2; CTRL	Cirobu.g00014498	1.25014	2.69986	0.000672273	0.480152	0.573234	0	https://www.aniseed.cnrs.fr/aniseed/gene/show_expression?unique_id=Cirobu.g00014498	https://www.aniseed.cnrs.fr/aniseed/gene/show_gene?unique_id=Cirobu.g00014498	http://ghost.zool.kyoto-u.ac.jp/cgi-bin/fordetailkh21.cgi?name=KH.S425.3;source=kh2013
KH.C3.774	MYO-1/2/3/5	MYH2; MYH6; MYH7	Cirobu.g00005979	4.81834	2.69868	0.00167456	-2.14891	0.0108801	1	https://www.aniseed.cnrs.fr/aniseed/gene/show_expression?unique_id=Cirobu.g00005979	https://www.aniseed.cnrs.fr/aniseed/gene/show_gene?unique_id=Cirobu.g00005979	http://ghost.zool.kyoto-u.ac.jp/cgi-bin/fordetailkh21.cgi?name=KH.C3.774;source=kh2013
KH.C9.610	KH2013:KH.C9.610_GPR112	ADGRD1; ADGRL2; ADGRL3	Cirobu.g00010174	0.720077	2.67274	0.0375627	0.0723442	1	0	https://www.aniseed.cnrs.fr/aniseed/gene/show_expression?unique_id=Cirobu.g00010174	https://www.aniseed.cnrs.fr/aniseed/gene/show_gene?unique_id=Cirobu.g00010174	http://ghost.zool.kyoto-u.ac.jp/cgi-bin/fordetailkh21.cgi?name=KH.C9.610;source=kh2013
KH.L37.26	CHRM3/5	CHRM1; CHRM3; CHRM5	Cirobu.g00012388	2.63794	2.66628	0.00170659	0.17527	0.849668	0	https://www.aniseed.cnrs.fr/aniseed/gene/show_expression?unique_id=Cirobu.g00012388	https://www.aniseed.cnrs.fr/aniseed/gene/show_gene?unique_id=Cirobu.g00012388	http://ghost.zool.kyoto-u.ac.jp/cgi-bin/fordetailkh21.cgi?name=KH.L37.26;source=kh2013
KH.C3.619	FMNL2A	DAAM1; DAAM2; FMNL1	Cirobu.g00005813	4.80873	2.65582	8.91e-05	-1.85571	0.00585603	0	https://www.aniseed.cnrs.fr/aniseed/gene/show_expression?unique_id=Cirobu.g00005813	https://www.aniseed.cnrs.fr/aniseed/gene/show_gene?unique_id=Cirobu.g00005813	http://ghost.zool.kyoto-u.ac.jp/cgi-bin/fordetailkh21.cgi?name=KH.C3.619;source=kh2013
KH.C1.499	KH2013:KH.C1.499	KH.C1.499	Cirobu.g00000743	1.27604	2.65401	0.0704359	-1.61001	0.289209	4	https://www.aniseed.cnrs.fr/aniseed/gene/show_expression?unique_id=Cirobu.g00000743	https://www.aniseed.cnrs.fr/aniseed/gene/show_gene?unique_id=Cirobu.g00000743	http://ghost.zool.kyoto-u.ac.jp/cgi-bin/fordetailkh21.cgi?name=KH.C1.499;source=kh2013
KH.C7.173	SLC7A14	SLC7A1; SLC7A14; SLC7A2	Cirobu.g00007996	5.49868	2.65381	0.00220407	-1.38861	0.0961917	0	https://www.aniseed.cnrs.fr/aniseed/gene/show_expression?unique_id=Cirobu.g00007996	https://www.aniseed.cnrs.fr/aniseed/gene/show_gene?unique_id=Cirobu.g00007996	http://ghost.zool.kyoto-u.ac.jp/cgi-bin/fordetailkh21.cgi?name=KH.C7.173;source=kh2013
KH.L87.39	BOK	BAX; BCL2; BOK	Cirobu.g00013200	3.27854	2.64835	7.75e-05	-1.64173	0.0148213	0	https://www.aniseed.cnrs.fr/aniseed/gene/show_expression?unique_id=Cirobu.g00013200	https://www.aniseed.cnrs.fr/aniseed/gene/show_gene?unique_id=Cirobu.g00013200	http://ghost.zool.kyoto-u.ac.jp/cgi-bin/fordetailkh21.cgi?name=KH.L87.39;source=kh2013
KH.C4.719	SEMA-1A	SEMA6A; SEMA6B; SEMA6D	Cirobu.g00006836	7.62728	2.63501	0.000101654	-1.64068	0.0124007	0	https://www.aniseed.cnrs.fr/aniseed/gene/show_expression?unique_id=Cirobu.g00006836	https://www.aniseed.cnrs.fr/aniseed/gene/show_gene?unique_id=Cirobu.g00006836	http://ghost.zool.kyoto-u.ac.jp/cgi-bin/fordetailkh21.cgi?name=KH.C4.719;source=kh2013
KH.C2.526	SLC32A1	SLC32A1; SLC36A1; SLC36A2	Cirobu.g00004733	3.19381	2.61601	0.172673	-0.686007	0.713194	19	https://www.aniseed.cnrs.fr/aniseed/gene/show_expression?unique_id=Cirobu.g00004733	https://www.aniseed.cnrs.fr/aniseed/gene/show_gene?unique_id=Cirobu.g00004733	http://ghost.zool.kyoto-u.ac.jp/cgi-bin/fordetailkh21.cgi?name=KH.C2.526;source=kh2013
KH.C5.20	KH2013:KH.C5.20	KH.C5.20	Cirobu.g00007066	1.97049	2.60728	0.00245379	-0.81745	0.361748	0	https://www.aniseed.cnrs.fr/aniseed/gene/show_expression?unique_id=Cirobu.g00007066	https://www.aniseed.cnrs.fr/aniseed/gene/show_gene?unique_id=Cirobu.g00007066	http://ghost.zool.kyoto-u.ac.jp/cgi-bin/fordetailkh21.cgi?name=KH.C5.20;source=kh2013
KH.C11.185	KIF26B	KIF26A; KIF26B	Cirobu.g00001997	5.73539	2.60248	3.7e-11	-1.69685	1.72e-05	4	https://www.aniseed.cnrs.fr/aniseed/gene/show_expression?unique_id=Cirobu.g00001997	https://www.aniseed.cnrs.fr/aniseed/gene/show_gene?unique_id=Cirobu.g00001997	http://ghost.zool.kyoto-u.ac.jp/cgi-bin/fordetailkh21.cgi?name=KH.C11.185;source=kh2013
KH.C8.235	LIPG	LIPG; PNLIP; PNLIPRP1	Cirobu.g00008852	2.77916	2.59865	0.00432215	-1.02765	0.266945	2	https://www.aniseed.cnrs.fr/aniseed/gene/show_expression?unique_id=Cirobu.g00008852	https://www.aniseed.cnrs.fr/aniseed/gene/show_gene?unique_id=Cirobu.g00008852	http://ghost.zool.kyoto-u.ac.jp/cgi-bin/fordetailkh21.cgi?name=KH.C8.235;source=kh2013
KH.C5.614	KH2013:KH.C5.614_NMUR1/2	CCKBR; GHSR; NTSR1	Cirobu.g00007518	1.32491	2.59529	0.00364686	-7.11269	8.72e-05	0	https://www.aniseed.cnrs.fr/aniseed/gene/show_expression?unique_id=Cirobu.g00007518	https://www.aniseed.cnrs.fr/aniseed/gene/show_gene?unique_id=Cirobu.g00007518	http://ghost.zool.kyoto-u.ac.jp/cgi-bin/fordetailkh21.cgi?name=KH.C5.614;source=kh2013
KH.L84.29	FBXO24	FBXO24; RCBTB2; RPGR	Cirobu.g00013155	0.608666	2.58555	0.11744	0.109115	1	0	https://www.aniseed.cnrs.fr/aniseed/gene/show_expression?unique_id=Cirobu.g00013155	https://www.aniseed.cnrs.fr/aniseed/gene/show_gene?unique_id=Cirobu.g00013155	http://ghost.zool.kyoto-u.ac.jp/cgi-bin/fordetailkh21.cgi?name=KH.L84.29;source=kh2013
KH.C4.754	PAX7	DRGX; PAX3; PAX7	Cirobu.g00006874	2.20834	2.58458	0.0293563	-2.28093	0.0525117	10	https://www.aniseed.cnrs.fr/aniseed/gene/show_expression?unique_id=Cirobu.g00006874	https://www.aniseed.cnrs.fr/aniseed/gene/show_gene?unique_id=Cirobu.g00006874	http://ghost.zool.kyoto-u.ac.jp/cgi-bin/fordetailkh21.cgi?name=KH.C4.754;source=kh2013
KH.C12.301	KH2013:KH.C12.301_FSTL4/5	FSTL4; FSTL5; IGDCC3	Cirobu.g00002844	8.89522	2.58163	1.79e-06	-1.46707	0.00489185	3	https://www.aniseed.cnrs.fr/aniseed/gene/show_expression?unique_id=Cirobu.g00002844	https://www.aniseed.cnrs.fr/aniseed/gene/show_gene?unique_id=Cirobu.g00002844	http://ghost.zool.kyoto-u.ac.jp/cgi-bin/fordetailkh21.cgi?name=KH.C12.301;source=kh2013
KH.C9.722	KH2013:KH.C9.722_PRDX6	PRDX1; PRDX2; PRDX6	Cirobu.g00010297	-0.16748	2.58117	0.0295597	3.47066	0.00278475	0	https://www.aniseed.cnrs.fr/aniseed/gene/show_expression?unique_id=Cirobu.g00010297	https://www.aniseed.cnrs.fr/aniseed/gene/show_gene?unique_id=Cirobu.g00010297	http://ghost.zool.kyoto-u.ac.jp/cgi-bin/fordetailkh21.cgi?name=KH.C9.722;source=kh2013
KH.C1.214	KH2013:KH.C1.214_NLRP1/10/11/12/13/14/2/3/4/5/6/7/8/9	NLRP12; NLRP3; NLRP6	Cirobu.g00000431	1.58763	2.57505	0.0229669	-1.06684	0.36953	0	https://www.aniseed.cnrs.fr/aniseed/gene/show_expression?unique_id=Cirobu.g00000431	https://www.aniseed.cnrs.fr/aniseed/gene/show_gene?unique_id=Cirobu.g00000431	http://ghost.zool.kyoto-u.ac.jp/cgi-bin/fordetailkh21.cgi?name=KH.C1.214;source=kh2013
KH.C2.737	KH2013:KH.C2.737_SBK1/2	MAP2K1; MAP2K2; TSSK6	Cirobu.g00004963	3.38079	2.57346	5.72e-05	-0.485892	0.442592	0	https://www.aniseed.cnrs.fr/aniseed/gene/show_expression?unique_id=Cirobu.g00004963	https://www.aniseed.cnrs.fr/aniseed/gene/show_gene?unique_id=Cirobu.g00004963	http://ghost.zool.kyoto-u.ac.jp/cgi-bin/fordetailkh21.cgi?name=KH.C2.737;source=kh2013
KH.C3.273	NRXN1/2/3	NRXN1; NRXN2; NRXN3	Cirobu.g00005440	5.60675	2.55406	0.00718122	-0.464625	0.60677	0	https://www.aniseed.cnrs.fr/aniseed/gene/show_expression?unique_id=Cirobu.g00005440	https://www.aniseed.cnrs.fr/aniseed/gene/show_gene?unique_id=Cirobu.g00005440	http://ghost.zool.kyoto-u.ac.jp/cgi-bin/fordetailkh21.cgi?name=KH.C3.273;source=kh2013
KH.L170.96	GNG2/8	GNG2; GNG4; GNG8	Cirobu.g00011835	5.74128	2.55257	4.44e-05	-1.62424	0.00764652	0	https://www.aniseed.cnrs.fr/aniseed/gene/show_expression?unique_id=Cirobu.g00011835	https://www.aniseed.cnrs.fr/aniseed/gene/show_gene?unique_id=Cirobu.g00011835	http://ghost.zool.kyoto-u.ac.jp/cgi-bin/fordetailkh21.cgi?name=KH.L170.96;source=kh2013
KH.C10.454	HCN1/2/3/4	HCN1; HCN2; HCN4	Cirobu.g00001676	4.95765	2.55103	0.000642156	-2.36866	0.001676	0	https://www.aniseed.cnrs.fr/aniseed/gene/show_expression?unique_id=Cirobu.g00001676	https://www.aniseed.cnrs.fr/aniseed/gene/show_gene?unique_id=Cirobu.g00001676	http://ghost.zool.kyoto-u.ac.jp/cgi-bin/fordetailkh21.cgi?name=KH.C10.454;source=kh2013
KH.S809.2	KH2013:KH.S809.2	KH.S809.2	Cirobu.g00015080	2.52941	2.54884	0.00460734	-0.589616	0.531851	0	https://www.aniseed.cnrs.fr/aniseed/gene/show_expression?unique_id=Cirobu.g00015080	https://www.aniseed.cnrs.fr/aniseed/gene/show_gene?unique_id=Cirobu.g00015080	http://ghost.zool.kyoto-u.ac.jp/cgi-bin/fordetailkh21.cgi?name=KH.S809.2;source=kh2013
KH.C4.115	Ci-R1CiGC26p03	KH.C4.115	Cirobu.g00006181	6.24474	2.54164	0.000141259	-1.3456	0.0371069	1	https://www.aniseed.cnrs.fr/aniseed/gene/show_expression?unique_id=Cirobu.g00006181	https://www.aniseed.cnrs.fr/aniseed/gene/show_gene?unique_id=Cirobu.g00006181	http://ghost.zool.kyoto-u.ac.jp/cgi-bin/fordetailkh21.cgi?name=KH.C4.115;source=kh2013
KH.C2.734	SYT7	SYT1; SYT2; SYT7	Cirobu.g00004960	5.03506	2.53893	0.0242296	-1.21846	0.261023	0	https://www.aniseed.cnrs.fr/aniseed/gene/show_expression?unique_id=Cirobu.g00004960	https://www.aniseed.cnrs.fr/aniseed/gene/show_gene?unique_id=Cirobu.g00004960	http://ghost.zool.kyoto-u.ac.jp/cgi-bin/fordetailkh21.cgi?name=KH.C2.734;source=kh2013
KH.C12.16	CPE	CPD; CPE; CPN1	Cirobu.g00002688	6.54625	2.52933	0.000555074	-0.866007	0.216042	7	https://www.aniseed.cnrs.fr/aniseed/gene/show_expression?unique_id=Cirobu.g00002688	https://www.aniseed.cnrs.fr/aniseed/gene/show_gene?unique_id=Cirobu.g00002688	http://ghost.zool.kyoto-u.ac.jp/cgi-bin/fordetailkh21.cgi?name=KH.C12.16;source=kh2013
KH.C9.789	KH2013:KH.C9.789_GPA1	GNAI1; GNAI2; GNAI3	Cirobu.g00010370	4.33342	2.52355	0.0194161	-0.496595	0.636275	0	https://www.aniseed.cnrs.fr/aniseed/gene/show_expression?unique_id=Cirobu.g00010370	https://www.aniseed.cnrs.fr/aniseed/gene/show_gene?unique_id=Cirobu.g00010370	http://ghost.zool.kyoto-u.ac.jp/cgi-bin/fordetailkh21.cgi?name=KH.C9.789;source=kh2013
KH.L164.21	KH2013:KH.L164.21	KH.L164.21	Cirobu.g00011689	4.15895	2.51355	9.6e-10	-2.34211	3.02e-07	0	https://www.aniseed.cnrs.fr/aniseed/gene/show_expression?unique_id=Cirobu.g00011689	https://www.aniseed.cnrs.fr/aniseed/gene/show_gene?unique_id=Cirobu.g00011689	http://ghost.zool.kyoto-u.ac.jp/cgi-bin/fordetailkh21.cgi?name=KH.L164.21;source=kh2013
KH.S346.10	KCNQ1	KCNQ1; KCNQ4; KCNQ5	Cirobu.g00014338	3.96123	2.51297	0.000599474	-0.588392	0.401099	0	https://www.aniseed.cnrs.fr/aniseed/gene/show_expression?unique_id=Cirobu.g00014338	https://www.aniseed.cnrs.fr/aniseed/gene/show_gene?unique_id=Cirobu.g00014338	http://ghost.zool.kyoto-u.ac.jp/cgi-bin/fordetailkh21.cgi?name=KH.S346.10;source=kh2013
KH.L22.30	KH2013:KH.L22.30	KH.L22.30	Cirobu.g00012145	1.19885	2.50126	0.0300084	-0.866106	0.452064	0	https://www.aniseed.cnrs.fr/aniseed/gene/show_expression?unique_id=Cirobu.g00012145	https://www.aniseed.cnrs.fr/aniseed/gene/show_gene?unique_id=Cirobu.g00012145	http://ghost.zool.kyoto-u.ac.jp/cgi-bin/fordetailkh21.cgi?name=KH.L22.30;source=kh2013
KH.C4.606	KH2013:KH.C4.606_BDS1	KH.C4.606	Cirobu.g00006711	2.79583	2.49494	0.000173866	-0.453558	0.49472	0	https://www.aniseed.cnrs.fr/aniseed/gene/show_expression?unique_id=Cirobu.g00006711	https://www.aniseed.cnrs.fr/aniseed/gene/show_gene?unique_id=Cirobu.g00006711	http://ghost.zool.kyoto-u.ac.jp/cgi-bin/fordetailkh21.cgi?name=KH.C4.606;source=kh2013
KH.C10.464	HRH1	KH.C10.464	Cirobu.g00001687	5.75107	2.49138	1.01e-10	-1.30542	0.000660638	1	https://www.aniseed.cnrs.fr/aniseed/gene/show_expression?unique_id=Cirobu.g00001687	https://www.aniseed.cnrs.fr/aniseed/gene/show_gene?unique_id=Cirobu.g00001687	http://ghost.zool.kyoto-u.ac.jp/cgi-bin/fordetailkh21.cgi?name=KH.C10.464;source=kh2013
KH.L141.43	SLC35G2/6	SLC35G2; SLC35G3; SLC35G6	Cirobu.g00011198	5.23094	2.49093	0.000617358	-3.08406	5.43e-05	8	https://www.aniseed.cnrs.fr/aniseed/gene/show_expression?unique_id=Cirobu.g00011198	https://www.aniseed.cnrs.fr/aniseed/gene/show_gene?unique_id=Cirobu.g00011198	http://ghost.zool.kyoto-u.ac.jp/cgi-bin/fordetailkh21.cgi?name=KH.L141.43;source=kh2013
KH.C6.149	A7UH64_CHICK	KH.C6.149	Cirobu.g00007668	3.85348	2.48427	0.00160319	-1.39467	0.0734534	0	https://www.aniseed.cnrs.fr/aniseed/gene/show_expression?unique_id=Cirobu.g00007668	https://www.aniseed.cnrs.fr/aniseed/gene/show_gene?unique_id=Cirobu.g00007668	http://ghost.zool.kyoto-u.ac.jp/cgi-bin/fordetailkh21.cgi?name=KH.C6.149;source=kh2013
KH.C5.8	SYN/1/2/3	RIMKLA; SYN1; SYN3	Cirobu.g00007591	5.37662	2.48201	0.0078056	-0.749004	0.400958	1	https://www.aniseed.cnrs.fr/aniseed/gene/show_expression?unique_id=Cirobu.g00007591	https://www.aniseed.cnrs.fr/aniseed/gene/show_gene?unique_id=Cirobu.g00007591	http://ghost.zool.kyoto-u.ac.jp/cgi-bin/fordetailkh21.cgi?name=KH.C5.8;source=kh2013
KH.L10.17	NHLRC2	NHLRC2; TRIM71	Cirobu.g00010507	4.16747	2.47714	4.68e-06	0.152082	0.781769	0	https://www.aniseed.cnrs.fr/aniseed/gene/show_expression?unique_id=Cirobu.g00010507	https://www.aniseed.cnrs.fr/aniseed/gene/show_gene?unique_id=Cirobu.g00010507	http://ghost.zool.kyoto-u.ac.jp/cgi-bin/fordetailkh21.cgi?name=KH.L10.17;source=kh2013
KH.C6.184	KH2013:KH.C6.184_RXFP3	CXCR4; RXFP3	Cirobu.g00007707	2.43843	2.45513	0.00221094	-2.26268	0.0127852	2	https://www.aniseed.cnrs.fr/aniseed/gene/show_expression?unique_id=Cirobu.g00007707	https://www.aniseed.cnrs.fr/aniseed/gene/show_gene?unique_id=Cirobu.g00007707	http://ghost.zool.kyoto-u.ac.jp/cgi-bin/fordetailkh21.cgi?name=KH.C6.184;source=kh2013
KH.C8.461	KH2013:KH.C8.461_ACS-10/14/6	ACSF2; ACSF3; ACSM3	Cirobu.g00009098	5.5869	2.45348	0.00764832	-0.516805	0.556415	0	https://www.aniseed.cnrs.fr/aniseed/gene/show_expression?unique_id=Cirobu.g00009098	https://www.aniseed.cnrs.fr/aniseed/gene/show_gene?unique_id=Cirobu.g00009098	http://ghost.zool.kyoto-u.ac.jp/cgi-bin/fordetailkh21.cgi?name=KH.C8.461;source=kh2013
KH.C2.252	TH	PAH; TH; TPH2	Cirobu.g00004432	2.18876	2.44566	0.00766344	-1.27411	0.163997	16	https://www.aniseed.cnrs.fr/aniseed/gene/show_expression?unique_id=Cirobu.g00004432	https://www.aniseed.cnrs.fr/aniseed/gene/show_gene?unique_id=Cirobu.g00004432	http://ghost.zool.kyoto-u.ac.jp/cgi-bin/fordetailkh21.cgi?name=KH.C2.252;source=kh2013
KH.C1.215	ACCN1/2	ASIC1; ASIC2; ASIC3	Cirobu.g00000432	7.01485	2.43731	0.0160353	-2.8845	0.00514911	3	https://www.aniseed.cnrs.fr/aniseed/gene/show_expression?unique_id=Cirobu.g00000432	https://www.aniseed.cnrs.fr/aniseed/gene/show_gene?unique_id=Cirobu.g00000432	http://ghost.zool.kyoto-u.ac.jp/cgi-bin/fordetailkh21.cgi?name=KH.C1.215;source=kh2013
KH.C9.102	FAM78B	FAM78A; FAM78B	Cirobu.g00009616	6.86679	2.43701	8.59e-08	-0.699259	0.112063	0	https://www.aniseed.cnrs.fr/aniseed/gene/show_expression?unique_id=Cirobu.g00009616	https://www.aniseed.cnrs.fr/aniseed/gene/show_gene?unique_id=Cirobu.g00009616	http://ghost.zool.kyoto-u.ac.jp/cgi-bin/fordetailkh21.cgi?name=KH.C9.102;source=kh2013
KH.C2.663	KH2013:KH.C2.663	SLC22A1; SLC22A4; SLC22A5	Cirobu.g00004884	4.28852	2.42691	1.75e-07	0.344295	0.463243	0	https://www.aniseed.cnrs.fr/aniseed/gene/show_expression?unique_id=Cirobu.g00004884	https://www.aniseed.cnrs.fr/aniseed/gene/show_gene?unique_id=Cirobu.g00004884	http://ghost.zool.kyoto-u.ac.jp/cgi-bin/fordetailkh21.cgi?name=KH.C2.663;source=kh2013
KH.C11.305	KH2013:KH.C11.305_FRRS1	FRRS1; FRRS1L	Cirobu.g00002127	2.29098	2.41741	0.000880362	-0.966047	0.208809	0	https://www.aniseed.cnrs.fr/aniseed/gene/show_expression?unique_id=Cirobu.g00002127	https://www.aniseed.cnrs.fr/aniseed/gene/show_gene?unique_id=Cirobu.g00002127	http://ghost.zool.kyoto-u.ac.jp/cgi-bin/fordetailkh21.cgi?name=KH.C11.305;source=kh2013
KH.C7.565	KH2013:KH.C7.565	KH.C7.565	Cirobu.g00008424	4.59459	2.41599	0.00378038	-3.10108	0.000418646	3	https://www.aniseed.cnrs.fr/aniseed/gene/show_expression?unique_id=Cirobu.g00008424	https://www.aniseed.cnrs.fr/aniseed/gene/show_gene?unique_id=Cirobu.g00008424	http://ghost.zool.kyoto-u.ac.jp/cgi-bin/fordetailkh21.cgi?name=KH.C7.565;source=kh2013
KH.L141.42	KH2013:KH.L141.42_CILP/2	CILP2; MUC5AC; MUC5B	Cirobu.g00011197	2.25329	2.41542	0.0023678	2.18963	0.00566133	0	https://www.aniseed.cnrs.fr/aniseed/gene/show_expression?unique_id=Cirobu.g00011197	https://www.aniseed.cnrs.fr/aniseed/gene/show_gene?unique_id=Cirobu.g00011197	http://ghost.zool.kyoto-u.ac.jp/cgi-bin/fordetailkh21.cgi?name=KH.L141.42;source=kh2013
KH.L96.83	KH2013:KH.L96.83_FUT8	FUT8; SH3RF1; SH3RF3	Cirobu.g00013431	2.87968	2.40883	0.015062	1.28293	0.187686	4	https://www.aniseed.cnrs.fr/aniseed/gene/show_expression?unique_id=Cirobu.g00013431	https://www.aniseed.cnrs.fr/aniseed/gene/show_gene?unique_id=Cirobu.g00013431	http://ghost.zool.kyoto-u.ac.jp/cgi-bin/fordetailkh21.cgi?name=KH.L96.83;source=kh2013
KH.C11.483	NDRG1/2/3/4	NDRG1; NDRG3; NDRG4	Cirobu.g00002318	7.86672	2.40012	3.17e-08	-0.439959	0.290377	6	https://www.aniseed.cnrs.fr/aniseed/gene/show_expression?unique_id=Cirobu.g00002318	https://www.aniseed.cnrs.fr/aniseed/gene/show_gene?unique_id=Cirobu.g00002318	http://ghost.zool.kyoto-u.ac.jp/cgi-bin/fordetailkh21.cgi?name=KH.C11.483;source=kh2013
KH.C2.1044	KH2013:KH.C2.1044	KH.C2.1044	Cirobu.g00004162	2.63353	2.39408	0.00146926	-0.59399	0.422311	0	https://www.aniseed.cnrs.fr/aniseed/gene/show_expression?unique_id=Cirobu.g00004162	https://www.aniseed.cnrs.fr/aniseed/gene/show_gene?unique_id=Cirobu.g00004162	http://ghost.zool.kyoto-u.ac.jp/cgi-bin/fordetailkh21.cgi?name=KH.C2.1044;source=kh2013
KH.C3.178	SCGN	CALB2; SCGN	Cirobu.g00005336	4.0699	2.39059	0.000571497	-1.30987	0.0558523	0	https://www.aniseed.cnrs.fr/aniseed/gene/show_expression?unique_id=Cirobu.g00005336	https://www.aniseed.cnrs.fr/aniseed/gene/show_gene?unique_id=Cirobu.g00005336	http://ghost.zool.kyoto-u.ac.jp/cgi-bin/fordetailkh21.cgi?name=KH.C3.178;source=kh2013
KH.C4.378	INSM1B	INSM1; INSM2; ZNF3	Cirobu.g00006463	3.22751	2.38176	0.000513082	-2.14355	0.00235078	9	https://www.aniseed.cnrs.fr/aniseed/gene/show_expression?unique_id=Cirobu.g00006463	https://www.aniseed.cnrs.fr/aniseed/gene/show_gene?unique_id=Cirobu.g00006463	http://ghost.zool.kyoto-u.ac.jp/cgi-bin/fordetailkh21.cgi?name=KH.C4.378;source=kh2013
KH.S115.23	PAN-1	TPBG; TPBGL	Cirobu.g00013644	2.91889	2.36948	0.1245	1.44982	0.336611	0	https://www.aniseed.cnrs.fr/aniseed/gene/show_expression?unique_id=Cirobu.g00013644	https://www.aniseed.cnrs.fr/aniseed/gene/show_gene?unique_id=Cirobu.g00013644	http://ghost.zool.kyoto-u.ac.jp/cgi-bin/fordetailkh21.cgi?name=KH.S115.23;source=kh2013
KH.L139.24	GPR22	ADORA2A; GPR22; MCHR1	Cirobu.g00011138	4.50699	2.36194	1.29e-07	-1.16716	0.0105585	0	https://www.aniseed.cnrs.fr/aniseed/gene/show_expression?unique_id=Cirobu.g00011138	https://www.aniseed.cnrs.fr/aniseed/gene/show_gene?unique_id=Cirobu.g00011138	http://ghost.zool.kyoto-u.ac.jp/cgi-bin/fordetailkh21.cgi?name=KH.L139.24;source=kh2013
KH.L172.15	CLEC-92/93/94/95/96/98/99	CHODL; PLA2R1; REG3A	Cirobu.g00011865	7.20534	2.35845	1.76e-05	-1.02028	0.0544588	0	https://www.aniseed.cnrs.fr/aniseed/gene/show_expression?unique_id=Cirobu.g00011865	https://www.aniseed.cnrs.fr/aniseed/gene/show_gene?unique_id=Cirobu.g00011865	http://ghost.zool.kyoto-u.ac.jp/cgi-bin/fordetailkh21.cgi?name=KH.L172.15;source=kh2013
KH.S1051.1	Ci-gnrh-1;	KH.S1051.1	Cirobu.g00013539	2.82811	2.335	0.000913072	-0.205077	0.767664	9	https://www.aniseed.cnrs.fr/aniseed/gene/show_expression?unique_id=Cirobu.g00013539	https://www.aniseed.cnrs.fr/aniseed/gene/show_gene?unique_id=Cirobu.g00013539	http://ghost.zool.kyoto-u.ac.jp/cgi-bin/fordetailkh21.cgi?name=KH.S1051.1;source=kh2013
KH.L24.10	EBF1/2/3/4	EBF1; EBF2; EBF3	Cirobu.g00012207	6.31816	2.33335	0.0829983	-1.80763	0.172057	50	https://www.aniseed.cnrs.fr/aniseed/gene/show_expression?unique_id=Cirobu.g00012207	https://www.aniseed.cnrs.fr/aniseed/gene/show_gene?unique_id=Cirobu.g00012207	http://ghost.zool.kyoto-u.ac.jp/cgi-bin/fordetailkh21.cgi?name=KH.L24.10;source=kh2013
KH.C1.1276	KH2013:KH.C1.1276_CALM1/2	CALM1; CALM3; CALML3	Cirobu.g00000306	2.64784	2.332	0.0214469	-0.416374	0.68752	0	https://www.aniseed.cnrs.fr/aniseed/gene/show_expression?unique_id=Cirobu.g00000306	https://www.aniseed.cnrs.fr/aniseed/gene/show_gene?unique_id=Cirobu.g00000306	http://ghost.zool.kyoto-u.ac.jp/cgi-bin/fordetailkh21.cgi?name=KH.C1.1276;source=kh2013
KH.C3.183	KH2013:KH.C3.183_RXFP1	RXFP1; RXFP2; TSHR	Cirobu.g00005342	2.43245	2.32763	0.0149152	0.280808	0.78017	0	https://www.aniseed.cnrs.fr/aniseed/gene/show_expression?unique_id=Cirobu.g00005342	https://www.aniseed.cnrs.fr/aniseed/gene/show_gene?unique_id=Cirobu.g00005342	http://ghost.zool.kyoto-u.ac.jp/cgi-bin/fordetailkh21.cgi?name=KH.C3.183;source=kh2013
KH.C4.760	CDK5R1/2	CDK5R1; CDK5R2	Cirobu.g00006881	7.39975	2.31157	1.9e-06	-1.27544	0.00685898	1	https://www.aniseed.cnrs.fr/aniseed/gene/show_expression?unique_id=Cirobu.g00006881	https://www.aniseed.cnrs.fr/aniseed/gene/show_gene?unique_id=Cirobu.g00006881	http://ghost.zool.kyoto-u.ac.jp/cgi-bin/fordetailkh21.cgi?name=KH.C4.760;source=kh2013
KH.C8.260	PODN	ECM2; PODN; PODNL1	Cirobu.g00008880	1.61982	2.30593	0.00333508	-0.529191	0.510473	0	https://www.aniseed.cnrs.fr/aniseed/gene/show_expression?unique_id=Cirobu.g00008880	https://www.aniseed.cnrs.fr/aniseed/gene/show_gene?unique_id=Cirobu.g00008880	http://ghost.zool.kyoto-u.ac.jp/cgi-bin/fordetailkh21.cgi?name=KH.C8.260;source=kh2013
KH.C5.502	NKX6-1/2/3	NKX6-1; NKX6-2; NKX6-3	Cirobu.g00007394	1.46951	2.30099	0.118888	0.120064	0.978808	16	https://www.aniseed.cnrs.fr/aniseed/gene/show_expression?unique_id=Cirobu.g00007394	https://www.aniseed.cnrs.fr/aniseed/gene/show_gene?unique_id=Cirobu.g00007394	http://ghost.zool.kyoto-u.ac.jp/cgi-bin/fordetailkh21.cgi?name=KH.C5.502;source=kh2013
KH.C12.379	KH2013:KH.C12.379_SLC6A1/13/8	SLC6A1; SLC6A12; SLC6A13	Cirobu.g00002929	6.08785	2.30062	1.08e-08	-0.46529	0.231504	0	https://www.aniseed.cnrs.fr/aniseed/gene/show_expression?unique_id=Cirobu.g00002929	https://www.aniseed.cnrs.fr/aniseed/gene/show_gene?unique_id=Cirobu.g00002929	http://ghost.zool.kyoto-u.ac.jp/cgi-bin/fordetailkh21.cgi?name=KH.C12.379;source=kh2013
KH.L37.13	W02D7.4/5	KH.L37.13	Cirobu.g00012374	1.61051	2.29781	0.00442306	0.41507	0.633784	0	https://www.aniseed.cnrs.fr/aniseed/gene/show_expression?unique_id=Cirobu.g00012374	https://www.aniseed.cnrs.fr/aniseed/gene/show_gene?unique_id=Cirobu.g00012374	http://ghost.zool.kyoto-u.ac.jp/cgi-bin/fordetailkh21.cgi?name=KH.L37.13;source=kh2013
KH.C11.495	KH2013:KH.C11.495_RXFP3	RXFP3; SSTR2	Cirobu.g00002331	5.29026	2.2963	0.00106707	-0.412131	0.544427	6	https://www.aniseed.cnrs.fr/aniseed/gene/show_expression?unique_id=Cirobu.g00002331	https://www.aniseed.cnrs.fr/aniseed/gene/show_gene?unique_id=Cirobu.g00002331	http://ghost.zool.kyoto-u.ac.jp/cgi-bin/fordetailkh21.cgi?name=KH.C11.495;source=kh2013
KH.C1.943	MUC22	KH.C1.943	Cirobu.g00001232	6.38843	2.28686	8.26e-05	-0.764236	0.172925	5	https://www.aniseed.cnrs.fr/aniseed/gene/show_expression?unique_id=Cirobu.g00001232	https://www.aniseed.cnrs.fr/aniseed/gene/show_gene?unique_id=Cirobu.g00001232	http://ghost.zool.kyoto-u.ac.jp/cgi-bin/fordetailkh21.cgi?name=KH.C1.943;source=kh2013
KH.S1090.4	GYPC	KH.S1090.4	Cirobu.g00013578	4.13108	2.28569	2.53e-06	-0.888718	0.0740097	0	https://www.aniseed.cnrs.fr/aniseed/gene/show_expression?unique_id=Cirobu.g00013578	https://www.aniseed.cnrs.fr/aniseed/gene/show_gene?unique_id=Cirobu.g00013578	http://ghost.zool.kyoto-u.ac.jp/cgi-bin/fordetailkh21.cgi?name=KH.S1090.4;source=kh2013
KH.C4.304	C2CD4C	SYT11; SYT4; SYT7	Cirobu.g00006384	4.31213	2.28101	2.85e-06	-1.22594	0.0131562	0	https://www.aniseed.cnrs.fr/aniseed/gene/show_expression?unique_id=Cirobu.g00006384	https://www.aniseed.cnrs.fr/aniseed/gene/show_gene?unique_id=Cirobu.g00006384	http://ghost.zool.kyoto-u.ac.jp/cgi-bin/fordetailkh21.cgi?name=KH.C4.304;source=kh2013
KH.C11.467	GAS2L1/3	GAS2; GAS2L1; GAS2L2	Cirobu.g00002301	5.32848	2.28064	0.058928	-1.34112	0.252408	0	https://www.aniseed.cnrs.fr/aniseed/gene/show_expression?unique_id=Cirobu.g00002301	https://www.aniseed.cnrs.fr/aniseed/gene/show_gene?unique_id=Cirobu.g00002301	http://ghost.zool.kyoto-u.ac.jp/cgi-bin/fordetailkh21.cgi?name=KH.C11.467;source=kh2013
KH.S928.1	KH2013:KH.S928.1_HTR3A	CHRNA9; HTR3A; HTR3E	Cirobu.g00015206	2.68027	2.27707	0.0039458	-0.660549	0.410427	0	https://www.aniseed.cnrs.fr/aniseed/gene/show_expression?unique_id=Cirobu.g00015206	https://www.aniseed.cnrs.fr/aniseed/gene/show_gene?unique_id=Cirobu.g00015206	http://ghost.zool.kyoto-u.ac.jp/cgi-bin/fordetailkh21.cgi?name=KH.S928.1;source=kh2013
KH.C1.616	KH2013:KH.C1.616	IMMP1L; IMMP2L	Cirobu.g00000871	1.41294	2.27592	0.0120771	0.36847	0.742868	2	https://www.aniseed.cnrs.fr/aniseed/gene/show_expression?unique_id=Cirobu.g00000871	https://www.aniseed.cnrs.fr/aniseed/gene/show_gene?unique_id=Cirobu.g00000871	http://ghost.zool.kyoto-u.ac.jp/cgi-bin/fordetailkh21.cgi?name=KH.C1.616;source=kh2013
KH.S417.5	SLC10A2/6	SLC10A1; SLC10A2; SLC10A6	Cirobu.g00014473	1.2245	2.26893	0.0201237	0.530306	0.618454	0	https://www.aniseed.cnrs.fr/aniseed/gene/show_expression?unique_id=Cirobu.g00014473	https://www.aniseed.cnrs.fr/aniseed/gene/show_gene?unique_id=Cirobu.g00014473	http://ghost.zool.kyoto-u.ac.jp/cgi-bin/fordetailkh21.cgi?name=KH.S417.5;source=kh2013
KH.L9.36	KCNK3/9	KCNK15; KCNK3; KCNK9	Cirobu.g00013263	3.8476	2.26309	0.000129445	-0.170424	0.778856	0	https://www.aniseed.cnrs.fr/aniseed/gene/show_expression?unique_id=Cirobu.g00013263	https://www.aniseed.cnrs.fr/aniseed/gene/show_gene?unique_id=Cirobu.g00013263	http://ghost.zool.kyoto-u.ac.jp/cgi-bin/fordetailkh21.cgi?name=KH.L9.36;source=kh2013
KH.C10.602	KH2013:KH.C10.602_QDR1/2/3	SLC22A3; SLC22A4; SLC22A5	Cirobu.g00001837	4.55968	2.26286	0.000192082	-0.980037	0.106656	2	https://www.aniseed.cnrs.fr/aniseed/gene/show_expression?unique_id=Cirobu.g00001837	https://www.aniseed.cnrs.fr/aniseed/gene/show_gene?unique_id=Cirobu.g00001837	http://ghost.zool.kyoto-u.ac.jp/cgi-bin/fordetailkh21.cgi?name=KH.C10.602;source=kh2013
KH.C4.775	KH2013:KH.C4.775_WBSCR27	METTL27	Cirobu.g00006897	0.54469	2.26266	0.0484811	-2.0205	0.135658	0	https://www.aniseed.cnrs.fr/aniseed/gene/show_expression?unique_id=Cirobu.g00006897	https://www.aniseed.cnrs.fr/aniseed/gene/show_gene?unique_id=Cirobu.g00006897	http://ghost.zool.kyoto-u.ac.jp/cgi-bin/fordetailkh21.cgi?name=KH.C4.775;source=kh2013
KH.C9.150	DCLK1/2	DCLK1; DCLK2; DCX	Cirobu.g00009669	6.64412	2.25582	0.000248144	-1.4466	0.0164575	0	https://www.aniseed.cnrs.fr/aniseed/gene/show_expression?unique_id=Cirobu.g00009669	https://www.aniseed.cnrs.fr/aniseed/gene/show_gene?unique_id=Cirobu.g00009669	http://ghost.zool.kyoto-u.ac.jp/cgi-bin/fordetailkh21.cgi?name=KH.C9.150;source=kh2013
KH.C11.2	MLP60A	AL928654.3; CRIP1; CRIP2	Cirobu.g00002013	6.10484	2.24787	3.05e-06	-0.54206	0.246212	0	https://www.aniseed.cnrs.fr/aniseed/gene/show_expression?unique_id=Cirobu.g00002013	https://www.aniseed.cnrs.fr/aniseed/gene/show_gene?unique_id=Cirobu.g00002013	http://ghost.zool.kyoto-u.ac.jp/cgi-bin/fordetailkh21.cgi?name=KH.C11.2;source=kh2013
KH.L22.28	GRM2/3/7/8	GABBR1	Cirobu.g00012142	3.70794	2.24758	0.00835737	-0.0626967	0.946723	4	https://www.aniseed.cnrs.fr/aniseed/gene/show_expression?unique_id=Cirobu.g00012142	https://www.aniseed.cnrs.fr/aniseed/gene/show_gene?unique_id=Cirobu.g00012142	http://ghost.zool.kyoto-u.ac.jp/cgi-bin/fordetailkh21.cgi?name=KH.L22.28;source=kh2013
KH.C2.983	KH2013:KH.C2.983_DHRS2/4	DHRS2; DHRS4; DHRS4L2	Cirobu.g00005232	0.288999	2.24507	0.0878596	0.418382	0.84697	0	https://www.aniseed.cnrs.fr/aniseed/gene/show_expression?unique_id=Cirobu.g00005232	https://www.aniseed.cnrs.fr/aniseed/gene/show_gene?unique_id=Cirobu.g00005232	http://ghost.zool.kyoto-u.ac.jp/cgi-bin/fordetailkh21.cgi?name=KH.C2.983;source=kh2013
KH.S1066.3	KH2013:KH.S1066.3_PTP1	PTPRJ; PTPRO; PTPRQ	Cirobu.g00013561	6.24056	2.23577	2.97e-08	-0.00927678	0.984197	3	https://www.aniseed.cnrs.fr/aniseed/gene/show_expression?unique_id=Cirobu.g00013561	https://www.aniseed.cnrs.fr/aniseed/gene/show_gene?unique_id=Cirobu.g00013561	http://ghost.zool.kyoto-u.ac.jp/cgi-bin/fordetailkh21.cgi?name=KH.S1066.3;source=kh2013
KH.C10.315	KH2013:KH.C10.315	KH.C10.315	Cirobu.g00001528	0.85071	2.23271	0.0511347	0.239507	0.919837	0	https://www.aniseed.cnrs.fr/aniseed/gene/show_expression?unique_id=Cirobu.g00001528	https://www.aniseed.cnrs.fr/aniseed/gene/show_gene?unique_id=Cirobu.g00001528	http://ghost.zool.kyoto-u.ac.jp/cgi-bin/fordetailkh21.cgi?name=KH.C10.315;source=kh2013
KH.C1.490	KH2013:KH.C1.490_CG42749	CCDC80	Cirobu.g00000734	1.26249	2.21105	0.0364297	0.698221	0.501539	0	https://www.aniseed.cnrs.fr/aniseed/gene/show_expression?unique_id=Cirobu.g00000734	https://www.aniseed.cnrs.fr/aniseed/gene/show_gene?unique_id=Cirobu.g00000734	http://ghost.zool.kyoto-u.ac.jp/cgi-bin/fordetailkh21.cgi?name=KH.C1.490;source=kh2013
KH.C1.706	KH2013:KH.C1.706_ZP4	CUZD1; TECTA; UMOD	Cirobu.g00000971	1.89862	2.20897	0.0237627	-0.983143	0.315292	0	https://www.aniseed.cnrs.fr/aniseed/gene/show_expression?unique_id=Cirobu.g00000971	https://www.aniseed.cnrs.fr/aniseed/gene/show_gene?unique_id=Cirobu.g00000971	http://ghost.zool.kyoto-u.ac.jp/cgi-bin/fordetailkh21.cgi?name=KH.C1.706;source=kh2013
KH.C11.511	CG14864	KH.C11.511	Cirobu.g00002350	4.39588	2.20373	5.06e-05	-0.39957	0.460913	0	https://www.aniseed.cnrs.fr/aniseed/gene/show_expression?unique_id=Cirobu.g00002350	https://www.aniseed.cnrs.fr/aniseed/gene/show_gene?unique_id=Cirobu.g00002350	http://ghost.zool.kyoto-u.ac.jp/cgi-bin/fordetailkh21.cgi?name=KH.C11.511;source=kh2013
KH.L105.3	KH2013:KH.L105.3	KH.L105.3	Cirobu.g00010567	6.21307	2.18251	6.84e-05	-0.72066	0.178664	0	https://www.aniseed.cnrs.fr/aniseed/gene/show_expression?unique_id=Cirobu.g00010567	https://www.aniseed.cnrs.fr/aniseed/gene/show_gene?unique_id=Cirobu.g00010567	http://ghost.zool.kyoto-u.ac.jp/cgi-bin/fordetailkh21.cgi?name=KH.L105.3;source=kh2013
KH.C4.789	MMP25	MMP15; MMP17; MMP24	Cirobu.g00006911	3.50283	2.18085	0.12796	-1.49844	0.288598	0	https://www.aniseed.cnrs.fr/aniseed/gene/show_expression?unique_id=Cirobu.g00006911	https://www.aniseed.cnrs.fr/aniseed/gene/show_gene?unique_id=Cirobu.g00006911	http://ghost.zool.kyoto-u.ac.jp/cgi-bin/fordetailkh21.cgi?name=KH.C4.789;source=kh2013
KH.C9.518	KH2013:KH.C9.518_BX119910.1/10/11/12/13/14/16/2/3/4/5/6/7/8/9	PCDHA3; PCDHGB4; PCDHGB5	Cirobu.g00010071	4.71601	2.17894	3.06e-07	-0.139298	0.755226	9	https://www.aniseed.cnrs.fr/aniseed/gene/show_expression?unique_id=Cirobu.g00010071	https://www.aniseed.cnrs.fr/aniseed/gene/show_gene?unique_id=Cirobu.g00010071	http://ghost.zool.kyoto-u.ac.jp/cgi-bin/fordetailkh21.cgi?name=KH.C9.518;source=kh2013
KH.S725.4	TMIE	KH.S725.4	Cirobu.g00014974	2.66446	2.1661	0.00375728	-0.226804	0.79028	0	https://www.aniseed.cnrs.fr/aniseed/gene/show_expression?unique_id=Cirobu.g00014974	https://www.aniseed.cnrs.fr/aniseed/gene/show_gene?unique_id=Cirobu.g00014974	http://ghost.zool.kyoto-u.ac.jp/cgi-bin/fordetailkh21.cgi?name=KH.S725.4;source=kh2013
KH.C3.669	KH2013:KH.C3.669_FUT8	FUT8	Cirobu.g00005866	1.71941	2.16421	0.0117606	0.797632	0.354577	0	https://www.aniseed.cnrs.fr/aniseed/gene/show_expression?unique_id=Cirobu.g00005866	https://www.aniseed.cnrs.fr/aniseed/gene/show_gene?unique_id=Cirobu.g00005866	http://ghost.zool.kyoto-u.ac.jp/cgi-bin/fordetailkh21.cgi?name=KH.C3.669;source=kh2013
KH.L6.1	MFNG	LFNG; MFNG; RFNG	Cirobu.g00012845	3.67463	2.16014	7.45e-06	-0.576824	0.231933	9	https://www.aniseed.cnrs.fr/aniseed/gene/show_expression?unique_id=Cirobu.g00012845	https://www.aniseed.cnrs.fr/aniseed/gene/show_gene?unique_id=Cirobu.g00012845	http://ghost.zool.kyoto-u.ac.jp/cgi-bin/fordetailkh21.cgi?name=KH.L6.1;source=kh2013
KH.L7.11	TACR1/2/3	TACR1; TACR2; TACR3	Cirobu.g00012972	4.03021	2.15917	0.00418638	-1.79358	0.0197934	2	https://www.aniseed.cnrs.fr/aniseed/gene/show_expression?unique_id=Cirobu.g00012972	https://www.aniseed.cnrs.fr/aniseed/gene/show_gene?unique_id=Cirobu.g00012972	http://ghost.zool.kyoto-u.ac.jp/cgi-bin/fordetailkh21.cgi?name=KH.L7.11;source=kh2013
KH.C8.585	ANO7	ANO4; ANO5; ANO7	Cirobu.g00009232	6.26759	2.15909	0.016305	-2.64276	0.00403697	0	https://www.aniseed.cnrs.fr/aniseed/gene/show_expression?unique_id=Cirobu.g00009232	https://www.aniseed.cnrs.fr/aniseed/gene/show_gene?unique_id=Cirobu.g00009232	http://ghost.zool.kyoto-u.ac.jp/cgi-bin/fordetailkh21.cgi?name=KH.C8.585;source=kh2013
KH.L119.20	KH2013:KH.L119.20	KH.L119.20	Cirobu.g00010857	5.95335	2.1589	1.02e-09	-1.44206	5.07e-05	0	https://www.aniseed.cnrs.fr/aniseed/gene/show_expression?unique_id=Cirobu.g00010857	https://www.aniseed.cnrs.fr/aniseed/gene/show_gene?unique_id=Cirobu.g00010857	http://ghost.zool.kyoto-u.ac.jp/cgi-bin/fordetailkh21.cgi?name=KH.L119.20;source=kh2013
KH.C2.709	KH2013:KH.C2.709	KH.C2.709	Cirobu.g00004932	2.23384	2.15351	0.00600689	-0.27558	0.753613	0	https://www.aniseed.cnrs.fr/aniseed/gene/show_expression?unique_id=Cirobu.g00004932	https://www.aniseed.cnrs.fr/aniseed/gene/show_gene?unique_id=Cirobu.g00004932	http://ghost.zool.kyoto-u.ac.jp/cgi-bin/fordetailkh21.cgi?name=KH.C2.709;source=kh2013
KH.C14.402	KH2013:KH.C14.402	KH.C14.402	Cirobu.g00003834	1.684	2.14856	0.0134438	-0.675149	0.427787	0	https://www.aniseed.cnrs.fr/aniseed/gene/show_expression?unique_id=Cirobu.g00003834	https://www.aniseed.cnrs.fr/aniseed/gene/show_gene?unique_id=Cirobu.g00003834	http://ghost.zool.kyoto-u.ac.jp/cgi-bin/fordetailkh21.cgi?name=KH.C14.402;source=kh2013
KH.C2.478	KH2013:KH.C2.478	KH.C2.478	Cirobu.g00004679	0.541398	2.14824	0.078416	-1.31921	0.297241	0	https://www.aniseed.cnrs.fr/aniseed/gene/show_expression?unique_id=Cirobu.g00004679	https://www.aniseed.cnrs.fr/aniseed/gene/show_gene?unique_id=Cirobu.g00004679	http://ghost.zool.kyoto-u.ac.jp/cgi-bin/fordetailkh21.cgi?name=KH.C2.478;source=kh2013
KH.C4.402	GALR2	APLNR; GALR2; QRFPR	Cirobu.g00006490	3.34207	2.14508	0.00068208	-0.787121	0.221932	0	https://www.aniseed.cnrs.fr/aniseed/gene/show_expression?unique_id=Cirobu.g00006490	https://www.aniseed.cnrs.fr/aniseed/gene/show_gene?unique_id=Cirobu.g00006490	http://ghost.zool.kyoto-u.ac.jp/cgi-bin/fordetailkh21.cgi?name=KH.C4.402;source=kh2013
KH.C7.75	NLGN1/2/3	NLGN1; NLGN2; NLGN4X	Cirobu.g00008627	5.11995	2.1442	0.0014683	-0.951347	0.152215	1	https://www.aniseed.cnrs.fr/aniseed/gene/show_expression?unique_id=Cirobu.g00008627	https://www.aniseed.cnrs.fr/aniseed/gene/show_gene?unique_id=Cirobu.g00008627	http://ghost.zool.kyoto-u.ac.jp/cgi-bin/fordetailkh21.cgi?name=KH.C7.75;source=kh2013
KH.C4.437	CAMK4	CAMK1D; CAMK4; PNCK	Cirobu.g00006528	5.60501	2.13805	0.0016527	-1.12124	0.0913261	0	https://www.aniseed.cnrs.fr/aniseed/gene/show_expression?unique_id=Cirobu.g00006528	https://www.aniseed.cnrs.fr/aniseed/gene/show_gene?unique_id=Cirobu.g00006528	http://ghost.zool.kyoto-u.ac.jp/cgi-bin/fordetailkh21.cgi?name=KH.C4.437;source=kh2013
KH.C3.474	KH2013:KH.C3.474_MDGA1/2	HSPG2; MDGA1; MDGA2	Cirobu.g00005658	4.96638	2.13798	0.0457694	-3.34917	0.00302941	0	https://www.aniseed.cnrs.fr/aniseed/gene/show_expression?unique_id=Cirobu.g00005658	https://www.aniseed.cnrs.fr/aniseed/gene/show_gene?unique_id=Cirobu.g00005658	http://ghost.zool.kyoto-u.ac.jp/cgi-bin/fordetailkh21.cgi?name=KH.C3.474;source=kh2013
KH.L53.17	PITPNM1/2/3	PITPNM1; PITPNM2; PITPNM3	Cirobu.g00012768	6.11786	2.13693	6.05e-08	-0.395282	0.302728	1	https://www.aniseed.cnrs.fr/aniseed/gene/show_expression?unique_id=Cirobu.g00012768	https://www.aniseed.cnrs.fr/aniseed/gene/show_gene?unique_id=Cirobu.g00012768	http://ghost.zool.kyoto-u.ac.jp/cgi-bin/fordetailkh21.cgi?name=KH.L53.17;source=kh2013
KH.C8.881	KH2013:KH.C8.881_SH3PXD2B	NCF1; SH3PXD2A; SH3PXD2B	Cirobu.g00009558	2.99333	2.13665	0.193117	-2.50002	0.13195	0	https://www.aniseed.cnrs.fr/aniseed/gene/show_expression?unique_id=Cirobu.g00009558	https://www.aniseed.cnrs.fr/aniseed/gene/show_gene?unique_id=Cirobu.g00009558	http://ghost.zool.kyoto-u.ac.jp/cgi-bin/fordetailkh21.cgi?name=KH.C8.881;source=kh2013
KH.C12.483	KH2013:KH.C12.483	KH.C12.483	Cirobu.g00003041	0.358784	2.13265	0.0765585	2.50134	0.0407393	0	https://www.aniseed.cnrs.fr/aniseed/gene/show_expression?unique_id=Cirobu.g00003041	https://www.aniseed.cnrs.fr/aniseed/gene/show_gene?unique_id=Cirobu.g00003041	http://ghost.zool.kyoto-u.ac.jp/cgi-bin/fordetailkh21.cgi?name=KH.C12.483;source=kh2013
KH.C2.249	CNGA1/2/3/5	CNGA1; CNGA2; CNGA3	Cirobu.g00004428	5.67375	2.12868	1.27e-06	-0.819643	0.0581981	8	https://www.aniseed.cnrs.fr/aniseed/gene/show_expression?unique_id=Cirobu.g00004428	https://www.aniseed.cnrs.fr/aniseed/gene/show_gene?unique_id=Cirobu.g00004428	http://ghost.zool.kyoto-u.ac.jp/cgi-bin/fordetailkh21.cgi?name=KH.C2.249;source=kh2013
KH.L28.8	FGF11/12/13/14	FGF12; FGF13; FGF14	Cirobu.g00012273	5.02609	2.12445	0.177183	-2.87707	0.0751523	9	https://www.aniseed.cnrs.fr/aniseed/gene/show_expression?unique_id=Cirobu.g00012273	https://www.aniseed.cnrs.fr/aniseed/gene/show_gene?unique_id=Cirobu.g00012273	http://ghost.zool.kyoto-u.ac.jp/cgi-bin/fordetailkh21.cgi?name=KH.L28.8;source=kh2013
KH.C11.608	IRX1/2/3/5	IRX3; IRX4; IRX6	Cirobu.g00002455	2.97548	2.11566	0.00375461	-0.444561	0.535851	10	https://www.aniseed.cnrs.fr/aniseed/gene/show_expression?unique_id=Cirobu.g00002455	https://www.aniseed.cnrs.fr/aniseed/gene/show_gene?unique_id=Cirobu.g00002455	http://ghost.zool.kyoto-u.ac.jp/cgi-bin/fordetailkh21.cgi?name=KH.C11.608;source=kh2013
KH.C2.506	DHCR7	DHCR7; LBR; TM7SF2	Cirobu.g00004711	6.74497	2.11377	4.63e-08	-0.108337	0.776523	0	https://www.aniseed.cnrs.fr/aniseed/gene/show_expression?unique_id=Cirobu.g00004711	https://www.aniseed.cnrs.fr/aniseed/gene/show_gene?unique_id=Cirobu.g00004711	http://ghost.zool.kyoto-u.ac.jp/cgi-bin/fordetailkh21.cgi?name=KH.C2.506;source=kh2013
KH.C8.156	ATP2B1/2/3/4	ATP2B1; ATP2B2; ATP2B3	Cirobu.g00008764	8.70575	2.11291	3.85e-05	-0.734253	0.138843	0	https://www.aniseed.cnrs.fr/aniseed/gene/show_expression?unique_id=Cirobu.g00008764	https://www.aniseed.cnrs.fr/aniseed/gene/show_gene?unique_id=Cirobu.g00008764	http://ghost.zool.kyoto-u.ac.jp/cgi-bin/fordetailkh21.cgi?name=KH.C8.156;source=kh2013
KH.S1090.3	KH2013:KH.S1090.3_MS4A1/15/18/2/3	MS4A8	Cirobu.g00013577	6.37338	2.1043	2.84e-05	0.0952091	0.848546	0	https://www.aniseed.cnrs.fr/aniseed/gene/show_expression?unique_id=Cirobu.g00013577	https://www.aniseed.cnrs.fr/aniseed/gene/show_gene?unique_id=Cirobu.g00013577	http://ghost.zool.kyoto-u.ac.jp/cgi-bin/fordetailkh21.cgi?name=KH.S1090.3;source=kh2013
KH.C12.288	OPRL1	CCR1; OPRL1; SSTR1	Cirobu.g00002829	0.275927	2.10051	0.174256	-0.542655	0.692047	0	https://www.aniseed.cnrs.fr/aniseed/gene/show_expression?unique_id=Cirobu.g00002829	https://www.aniseed.cnrs.fr/aniseed/gene/show_gene?unique_id=Cirobu.g00002829	http://ghost.zool.kyoto-u.ac.jp/cgi-bin/fordetailkh21.cgi?name=KH.C12.288;source=kh2013
KH.C4.371	KH2013:KH.C4.371_NPHP3	NPHP3	Cirobu.g00006457	0.740019	2.09693	0.009111	0.820525	0.32458	0	https://www.aniseed.cnrs.fr/aniseed/gene/show_expression?unique_id=Cirobu.g00006457	https://www.aniseed.cnrs.fr/aniseed/gene/show_gene?unique_id=Cirobu.g00006457	http://ghost.zool.kyoto-u.ac.jp/cgi-bin/fordetailkh21.cgi?name=KH.C4.371;source=kh2013
KH.C8.892	KH2013:KH.C8.892_TUB1/3	TUBA1C; TUBA3C; TUBA3D	Cirobu.g00009570	11.7612	2.09085	2.08e-05	-1.06518	0.0256807	15	https://www.aniseed.cnrs.fr/aniseed/gene/show_expression?unique_id=Cirobu.g00009570	https://www.aniseed.cnrs.fr/aniseed/gene/show_gene?unique_id=Cirobu.g00009570	http://ghost.zool.kyoto-u.ac.jp/cgi-bin/fordetailkh21.cgi?name=KH.C8.892;source=kh2013
KH.C1.118	SRRM4	SRRM4	Cirobu.g00000200	6.03252	2.08998	6.3e-05	-1.05417	0.0389239	5	https://www.aniseed.cnrs.fr/aniseed/gene/show_expression?unique_id=Cirobu.g00000200	https://www.aniseed.cnrs.fr/aniseed/gene/show_gene?unique_id=Cirobu.g00000200	http://ghost.zool.kyoto-u.ac.jp/cgi-bin/fordetailkh21.cgi?name=KH.C1.118;source=kh2013
KH.C10.529	KH2013:KH.C10.529_CG9517	CHDH	Cirobu.g00001756	1.70384	2.0895	0.0913656	-0.209833	0.877077	0	https://www.aniseed.cnrs.fr/aniseed/gene/show_expression?unique_id=Cirobu.g00001756	https://www.aniseed.cnrs.fr/aniseed/gene/show_gene?unique_id=Cirobu.g00001756	http://ghost.zool.kyoto-u.ac.jp/cgi-bin/fordetailkh21.cgi?name=KH.C10.529;source=kh2013
KH.C6.185	ONECUT/1/2/3	ONECUT1; ONECUT2; ONECUT3	Cirobu.g00007708	7.32395	2.08298	7.97e-05	-1.67035	0.00138876	109	https://www.aniseed.cnrs.fr/aniseed/gene/show_expression?unique_id=Cirobu.g00007708	https://www.aniseed.cnrs.fr/aniseed/gene/show_gene?unique_id=Cirobu.g00007708	http://ghost.zool.kyoto-u.ac.jp/cgi-bin/fordetailkh21.cgi?name=KH.C6.185;source=kh2013
KH.C2.402	MAB21L1/2	MAB21L1; MAB21L2; MAB21L3	Cirobu.g00004597	4.68995	2.07237	0.000218254	-1.64447	0.00365023	0	https://www.aniseed.cnrs.fr/aniseed/gene/show_expression?unique_id=Cirobu.g00004597	https://www.aniseed.cnrs.fr/aniseed/gene/show_gene?unique_id=Cirobu.g00004597	http://ghost.zool.kyoto-u.ac.jp/cgi-bin/fordetailkh21.cgi?name=KH.C2.402;source=kh2013
KH.C9.622	CG4877	DEAF1; RUNX1T1	Cirobu.g00010187	1.98846	2.0531	0.0856652	-1.25427	0.286945	11	https://www.aniseed.cnrs.fr/aniseed/gene/show_expression?unique_id=Cirobu.g00010187	https://www.aniseed.cnrs.fr/aniseed/gene/show_gene?unique_id=Cirobu.g00010187	http://ghost.zool.kyoto-u.ac.jp/cgi-bin/fordetailkh21.cgi?name=KH.C9.622;source=kh2013
KH.C4.804	KH2013:KH.C4.804_GJC2	GJA8; GJC1; GJD2	Cirobu.g00006929	5.50451	2.04992	0.00346891	-0.427211	0.527774	0	https://www.aniseed.cnrs.fr/aniseed/gene/show_expression?unique_id=Cirobu.g00006929	https://www.aniseed.cnrs.fr/aniseed/gene/show_gene?unique_id=Cirobu.g00006929	http://ghost.zool.kyoto-u.ac.jp/cgi-bin/fordetailkh21.cgi?name=KH.C4.804;source=kh2013
KH.C3.549	GEL	AVIL; GSN; SCIN	Cirobu.g00005737	4.92022	2.0387	3.13e-05	-1.09496	0.0245063	0	https://www.aniseed.cnrs.fr/aniseed/gene/show_expression?unique_id=Cirobu.g00005737	https://www.aniseed.cnrs.fr/aniseed/gene/show_gene?unique_id=Cirobu.g00005737	http://ghost.zool.kyoto-u.ac.jp/cgi-bin/fordetailkh21.cgi?name=KH.C3.549;source=kh2013
KH.C12.527	KH2013:KH.C12.527_GRIA2/3/4	GRID2; GRIK1; GRIK3	Cirobu.g00003090	0.860782	2.0309	0.253436	-0.316954	0.866754	0	https://www.aniseed.cnrs.fr/aniseed/gene/show_expression?unique_id=Cirobu.g00003090	https://www.aniseed.cnrs.fr/aniseed/gene/show_gene?unique_id=Cirobu.g00003090	http://ghost.zool.kyoto-u.ac.jp/cgi-bin/fordetailkh21.cgi?name=KH.C12.527;source=kh2013
KH.L170.66	FASTKD2/3/5	FASTKD2; TBRG4	Cirobu.g00011804	7.6473	2.02346	0.000324939	-0.916328	0.094287	1	https://www.aniseed.cnrs.fr/aniseed/gene/show_expression?unique_id=Cirobu.g00011804	https://www.aniseed.cnrs.fr/aniseed/gene/show_gene?unique_id=Cirobu.g00011804	http://ghost.zool.kyoto-u.ac.jp/cgi-bin/fordetailkh21.cgi?name=KH.L170.66;source=kh2013
KH.C2.798	KH2013:KH.C2.798_YPC1	ACER1; ACER2; ACER3	Cirobu.g00005028	6.31115	2.02306	7.08e-05	0.099837	0.838297	0	https://www.aniseed.cnrs.fr/aniseed/gene/show_expression?unique_id=Cirobu.g00005028	https://www.aniseed.cnrs.fr/aniseed/gene/show_gene?unique_id=Cirobu.g00005028	http://ghost.zool.kyoto-u.ac.jp/cgi-bin/fordetailkh21.cgi?name=KH.C2.798;source=kh2013
KH.C3.445	NALCN	NALCN	Cirobu.g00005626	3.17816	2.01709	0.00995054	-0.168368	0.838216	0	https://www.aniseed.cnrs.fr/aniseed/gene/show_expression?unique_id=Cirobu.g00005626	https://www.aniseed.cnrs.fr/aniseed/gene/show_gene?unique_id=Cirobu.g00005626	http://ghost.zool.kyoto-u.ac.jp/cgi-bin/fordetailkh21.cgi?name=KH.C3.445;source=kh2013
KH.C1.314	RGS1/10/13/18/3/4/5/8	RGS17; RGS19; RGS20	Cirobu.g00000542	6.94286	2.01546	0.00224492	-1.35674	0.0362991	2	https://www.aniseed.cnrs.fr/aniseed/gene/show_expression?unique_id=Cirobu.g00000542	https://www.aniseed.cnrs.fr/aniseed/gene/show_gene?unique_id=Cirobu.g00000542	http://ghost.zool.kyoto-u.ac.jp/cgi-bin/fordetailkh21.cgi?name=KH.C1.314;source=kh2013
KH.C3.806	KH2013:KH.C3.806_IGSF9	IGSF9	Cirobu.g00006013	4.52456	2.01093	0.000387878	-1.34159	0.0203711	0	https://www.aniseed.cnrs.fr/aniseed/gene/show_expression?unique_id=Cirobu.g00006013	https://www.aniseed.cnrs.fr/aniseed/gene/show_gene?unique_id=Cirobu.g00006013	http://ghost.zool.kyoto-u.ac.jp/cgi-bin/fordetailkh21.cgi?name=KH.C3.806;source=kh2013
KH.C1.1157	KCND1/2/3	KCND1; KCND2; KCND3	Cirobu.g00000176	4.7644	2.01089	0.0469989	-1.36534	0.170392	0	https://www.aniseed.cnrs.fr/aniseed/gene/show_expression?unique_id=Cirobu.g00000176	https://www.aniseed.cnrs.fr/aniseed/gene/show_gene?unique_id=Cirobu.g00000176	http://ghost.zool.kyoto-u.ac.jp/cgi-bin/fordetailkh21.cgi?name=KH.C1.1157;source=kh2013
KH.L144.5	ASRGL1	AGA; ASRGL1; TASP1	Cirobu.g00011275	5.45497	2.00973	1.35e-05	-1.3363	0.00399922	0	https://www.aniseed.cnrs.fr/aniseed/gene/show_expression?unique_id=Cirobu.g00011275	https://www.aniseed.cnrs.fr/aniseed/gene/show_gene?unique_id=Cirobu.g00011275	http://ghost.zool.kyoto-u.ac.jp/cgi-bin/fordetailkh21.cgi?name=KH.L144.5;source=kh2013
KH.C8.904	DKK3	DKK3	Cirobu.g00009584	6.6449	2.00362	6.26e-05	-0.808172	0.0988775	8	https://www.aniseed.cnrs.fr/aniseed/gene/show_expression?unique_id=Cirobu.g00009584	https://www.aniseed.cnrs.fr/aniseed/gene/show_gene?unique_id=Cirobu.g00009584	http://ghost.zool.kyoto-u.ac.jp/cgi-bin/fordetailkh21.cgi?name=KH.C8.904;source=kh2013
KH.L112.32	GRK4/5	GRK4; GRK5; GRK6	Cirobu.g00010708	2.97236	2.00269	0.00277182	-0.277863	0.696908	3	https://www.aniseed.cnrs.fr/aniseed/gene/show_expression?unique_id=Cirobu.g00010708	https://www.aniseed.cnrs.fr/aniseed/gene/show_gene?unique_id=Cirobu.g00010708	http://ghost.zool.kyoto-u.ac.jp/cgi-bin/fordetailkh21.cgi?name=KH.L112.32;source=kh2013
KH.L87.1	TSP47F	CD37; CD53; TSPAN2	Cirobu.g00013170	0.310133	2.00109	0.0663855	0.490719	0.738071	0	https://www.aniseed.cnrs.fr/aniseed/gene/show_expression?unique_id=Cirobu.g00013170	https://www.aniseed.cnrs.fr/aniseed/gene/show_gene?unique_id=Cirobu.g00013170	http://ghost.zool.kyoto-u.ac.jp/cgi-bin/fordetailkh21.cgi?name=KH.L87.1;source=kh2013
KH.L50.5	SLC24A1/2	SLC24A2; SLC24A3; SLC24A4	Cirobu.g00012742	7.1086	1.99868	0.000956234	-1.33296	0.0250189	0	https://www.aniseed.cnrs.fr/aniseed/gene/show_expression?unique_id=Cirobu.g00012742	https://www.aniseed.cnrs.fr/aniseed/gene/show_gene?unique_id=Cirobu.g00012742	http://ghost.zool.kyoto-u.ac.jp/cgi-bin/fordetailkh21.cgi?name=KH.L50.5;source=kh2013
KH.C10.475	KH2013:KH.C10.475_FAM154B	SAXO1; SAXO2	Cirobu.g00001698	4.33908	1.99	0.175665	-2.40718	0.108083	0	https://www.aniseed.cnrs.fr/aniseed/gene/show_expression?unique_id=Cirobu.g00001698	https://www.aniseed.cnrs.fr/aniseed/gene/show_gene?unique_id=Cirobu.g00001698	http://ghost.zool.kyoto-u.ac.jp/cgi-bin/fordetailkh21.cgi?name=KH.C10.475;source=kh2013
KH.C14.565	CCKLR-17D1/3	CCKAR; CCKBR; HCRTR2	Cirobu.g00004011	2.14274	1.98757	0.0292413	-1.02258	0.261907	0	https://www.aniseed.cnrs.fr/aniseed/gene/show_expression?unique_id=Cirobu.g00004011	https://www.aniseed.cnrs.fr/aniseed/gene/show_gene?unique_id=Cirobu.g00004011	http://ghost.zool.kyoto-u.ac.jp/cgi-bin/fordetailkh21.cgi?name=KH.C14.565;source=kh2013
KH.C8.359	IHH	DHH; IHH; SHH	Cirobu.g00008984	2.73974	1.98734	0.00268847	-1.9338	0.00780959	14	https://www.aniseed.cnrs.fr/aniseed/gene/show_expression?unique_id=Cirobu.g00008984	https://www.aniseed.cnrs.fr/aniseed/gene/show_gene?unique_id=Cirobu.g00008984	http://ghost.zool.kyoto-u.ac.jp/cgi-bin/fordetailkh21.cgi?name=KH.C8.359;source=kh2013
KH.L83.7	GLRA1/2/3/4	GLRA1; GLRA2; GLRA3	Cirobu.g00013133	3.66381	1.98372	0.0214757	-1.76321	0.0410744	0	https://www.aniseed.cnrs.fr/aniseed/gene/show_expression?unique_id=Cirobu.g00013133	https://www.aniseed.cnrs.fr/aniseed/gene/show_gene?unique_id=Cirobu.g00013133	http://ghost.zool.kyoto-u.ac.jp/cgi-bin/fordetailkh21.cgi?name=KH.L83.7;source=kh2013
KH.C5.508	KH2013:KH.C5.508_RAB27B	RAB27A; RAB27B; RAB3D	Cirobu.g00007400	2.24581	1.98183	0.0385112	0.568365	0.552333	0	https://www.aniseed.cnrs.fr/aniseed/gene/show_expression?unique_id=Cirobu.g00007400	https://www.aniseed.cnrs.fr/aniseed/gene/show_gene?unique_id=Cirobu.g00007400	http://ghost.zool.kyoto-u.ac.jp/cgi-bin/fordetailkh21.cgi?name=KH.C5.508;source=kh2013
KH.L96.82	KH2013:KH.L96.82	KH.L96.82	Cirobu.g00013430	1.96623	1.9795	0.185413	0.320706	0.844102	0	https://www.aniseed.cnrs.fr/aniseed/gene/show_expression?unique_id=Cirobu.g00013430	https://www.aniseed.cnrs.fr/aniseed/gene/show_gene?unique_id=Cirobu.g00013430	http://ghost.zool.kyoto-u.ac.jp/cgi-bin/fordetailkh21.cgi?name=KH.L96.82;source=kh2013
KH.C1.569	KH2013:KH.C1.569	KH.C1.569	Cirobu.g00000819	2.08752	1.97728	0.241523	-2.81947	0.103688	0	https://www.aniseed.cnrs.fr/aniseed/gene/show_expression?unique_id=Cirobu.g00000819	https://www.aniseed.cnrs.fr/aniseed/gene/show_gene?unique_id=Cirobu.g00000819	http://ghost.zool.kyoto-u.ac.jp/cgi-bin/fordetailkh21.cgi?name=KH.C1.569;source=kh2013
KH.C1.295	KH2013:KH.C1.295	KH.C1.295	Cirobu.g00000520	1.1185	1.97621	0.291529	-1.66237	0.370866	0	https://www.aniseed.cnrs.fr/aniseed/gene/show_expression?unique_id=Cirobu.g00000520	https://www.aniseed.cnrs.fr/aniseed/gene/show_gene?unique_id=Cirobu.g00000520	http://ghost.zool.kyoto-u.ac.jp/cgi-bin/fordetailkh21.cgi?name=KH.C1.295;source=kh2013
KH.C1.749	KH2013:KH.C1.749_MASP1/2	C1R; MASP1; MASP2	Cirobu.g00001018	2.77589	1.976	0.132447	-1.25571	0.329933	0	https://www.aniseed.cnrs.fr/aniseed/gene/show_expression?unique_id=Cirobu.g00001018	https://www.aniseed.cnrs.fr/aniseed/gene/show_gene?unique_id=Cirobu.g00001018	http://ghost.zool.kyoto-u.ac.jp/cgi-bin/fordetailkh21.cgi?name=KH.C1.749;source=kh2013
KH.C11.593	CHRM1/2/4/5	CHRM1; CHRM3; CHRM5	Cirobu.g00002438	4.29095	1.97088	0.00305582	-1.18896	0.0717705	0	https://www.aniseed.cnrs.fr/aniseed/gene/show_expression?unique_id=Cirobu.g00002438	https://www.aniseed.cnrs.fr/aniseed/gene/show_gene?unique_id=Cirobu.g00002438	http://ghost.zool.kyoto-u.ac.jp/cgi-bin/fordetailkh21.cgi?name=KH.C11.593;source=kh2013
KH.C4.495	E1BRZ4_CHICK	CTBP1; GRHPR; PHGDH	Cirobu.g00006592	1.79657	1.96305	0.0878272	-0.365323	0.762144	4	https://www.aniseed.cnrs.fr/aniseed/gene/show_expression?unique_id=Cirobu.g00006592	https://www.aniseed.cnrs.fr/aniseed/gene/show_gene?unique_id=Cirobu.g00006592	http://ghost.zool.kyoto-u.ac.jp/cgi-bin/fordetailkh21.cgi?name=KH.C4.495;source=kh2013
KH.C4.661	KH2013:KH.C4.661_WBSCR27	METTL27	Cirobu.g00006772	1.90624	1.96013	0.133873	0.0737183	0.970081	0	https://www.aniseed.cnrs.fr/aniseed/gene/show_expression?unique_id=Cirobu.g00006772	https://www.aniseed.cnrs.fr/aniseed/gene/show_gene?unique_id=Cirobu.g00006772	http://ghost.zool.kyoto-u.ac.jp/cgi-bin/fordetailkh21.cgi?name=KH.C4.661;source=kh2013
KH.S655.3	Ci-META6	KH.S655.3	Cirobu.g00014878	2.29169	1.95608	0.00765183	0.435266	0.56789	0	https://www.aniseed.cnrs.fr/aniseed/gene/show_expression?unique_id=Cirobu.g00014878	https://www.aniseed.cnrs.fr/aniseed/gene/show_gene?unique_id=Cirobu.g00014878	http://ghost.zool.kyoto-u.ac.jp/cgi-bin/fordetailkh21.cgi?name=KH.S655.3;source=kh2013
KH.C2.735	KH2013:KH.C2.735	GCNT1; GCNT3; GCNT4	Cirobu.g00004961	0.899336	1.95595	0.146444	-2.45785	0.082593	0	https://www.aniseed.cnrs.fr/aniseed/gene/show_expression?unique_id=Cirobu.g00004961	https://www.aniseed.cnrs.fr/aniseed/gene/show_gene?unique_id=Cirobu.g00004961	http://ghost.zool.kyoto-u.ac.jp/cgi-bin/fordetailkh21.cgi?name=KH.C2.735;source=kh2013
KH.C2.872	KH2013:KH.C2.872_GPA1	GNAI1; GNAI2; GNAI3	Cirobu.g00005111	5.99944	1.95054	0.00018123	-1.06024	0.038563	3	https://www.aniseed.cnrs.fr/aniseed/gene/show_expression?unique_id=Cirobu.g00005111	https://www.aniseed.cnrs.fr/aniseed/gene/show_gene?unique_id=Cirobu.g00005111	http://ghost.zool.kyoto-u.ac.jp/cgi-bin/fordetailkh21.cgi?name=KH.C2.872;source=kh2013
KH.L18.31	KLHL21/24	KLHL20; KLHL24; KLHL3	Cirobu.g00011968	0.580943	1.94968	0.021083	0.641053	0.513512	0	https://www.aniseed.cnrs.fr/aniseed/gene/show_expression?unique_id=Cirobu.g00011968	https://www.aniseed.cnrs.fr/aniseed/gene/show_gene?unique_id=Cirobu.g00011968	http://ghost.zool.kyoto-u.ac.jp/cgi-bin/fordetailkh21.cgi?name=KH.L18.31;source=kh2013
KH.C9.713	KH2013:KH.C9.713_KRTAP10-4/6/7	USH2A	Cirobu.g00010287	0.520533	1.9389	0.0606877	1.50879	0.14959	0	https://www.aniseed.cnrs.fr/aniseed/gene/show_expression?unique_id=Cirobu.g00010287	https://www.aniseed.cnrs.fr/aniseed/gene/show_gene?unique_id=Cirobu.g00010287	http://ghost.zool.kyoto-u.ac.jp/cgi-bin/fordetailkh21.cgi?name=KH.C9.713;source=kh2013
KH.C2.182	C19ORF45	TEX45	Cirobu.g00004356	1.86528	1.93782	0.0594631	-0.00792444	1	0	https://www.aniseed.cnrs.fr/aniseed/gene/show_expression?unique_id=Cirobu.g00004356	https://www.aniseed.cnrs.fr/aniseed/gene/show_gene?unique_id=Cirobu.g00004356	http://ghost.zool.kyoto-u.ac.jp/cgi-bin/fordetailkh21.cgi?name=KH.C2.182;source=kh2013
KH.S435.4	ZGC:175131	FAT4; IMPG2; NOTCH3	Cirobu.g00014518	2.35362	1.93759	0.0527361	-0.124728	0.913248	0	https://www.aniseed.cnrs.fr/aniseed/gene/show_expression?unique_id=Cirobu.g00014518	https://www.aniseed.cnrs.fr/aniseed/gene/show_gene?unique_id=Cirobu.g00014518	http://ghost.zool.kyoto-u.ac.jp/cgi-bin/fordetailkh21.cgi?name=KH.S435.4;source=kh2013
KH.C13.76	LPHN1/3	ADGRG6; ADGRG7; ADGRL1	Cirobu.g00003479	2.52634	1.93553	0.223504	-1.15829	0.462602	0	https://www.aniseed.cnrs.fr/aniseed/gene/show_expression?unique_id=Cirobu.g00003479	https://www.aniseed.cnrs.fr/aniseed/gene/show_gene?unique_id=Cirobu.g00003479	http://ghost.zool.kyoto-u.ac.jp/cgi-bin/fordetailkh21.cgi?name=KH.C13.76;source=kh2013
KH.L134.30	KH2013:KH.L134.30_GST-1/10/25/41	GSTM1; GSTM3; GSTM4	Cirobu.g00011096	2.22426	1.92495	0.0663703	-0.957658	0.359974	0	https://www.aniseed.cnrs.fr/aniseed/gene/show_expression?unique_id=Cirobu.g00011096	https://www.aniseed.cnrs.fr/aniseed/gene/show_gene?unique_id=Cirobu.g00011096	http://ghost.zool.kyoto-u.ac.jp/cgi-bin/fordetailkh21.cgi?name=KH.L134.30;source=kh2013
KH.C1.799	KH2013:KH.C1.799	CUZD1; TECTA; UMOD	Cirobu.g00001072	0.996237	1.924	0.101548	-0.882706	0.470366	1	https://www.aniseed.cnrs.fr/aniseed/gene/show_expression?unique_id=Cirobu.g00001072	https://www.aniseed.cnrs.fr/aniseed/gene/show_gene?unique_id=Cirobu.g00001072	http://ghost.zool.kyoto-u.ac.jp/cgi-bin/fordetailkh21.cgi?name=KH.C1.799;source=kh2013
KH.C2.571	C01B12.3/5	BEST2; BEST3; BEST4	Cirobu.g00004783	4.67616	1.92012	0.0234151	0.409726	0.622	0	https://www.aniseed.cnrs.fr/aniseed/gene/show_expression?unique_id=Cirobu.g00004783	https://www.aniseed.cnrs.fr/aniseed/gene/show_gene?unique_id=Cirobu.g00004783	http://ghost.zool.kyoto-u.ac.jp/cgi-bin/fordetailkh21.cgi?name=KH.C2.571;source=kh2013
KH.C5.45	GDH1/3	GLUD1; GLUD2	Cirobu.g00007335	4.6007	1.91116	0.00169034	-0.622785	0.299053	0	https://www.aniseed.cnrs.fr/aniseed/gene/show_expression?unique_id=Cirobu.g00007335	https://www.aniseed.cnrs.fr/aniseed/gene/show_gene?unique_id=Cirobu.g00007335	http://ghost.zool.kyoto-u.ac.jp/cgi-bin/fordetailkh21.cgi?name=KH.C5.45;source=kh2013
KH.S761.9	KH2013:KH.S761.9	NRSN1	Cirobu.g00015011	4.21541	1.9102	0.00224061	-0.959613	0.120608	0	https://www.aniseed.cnrs.fr/aniseed/gene/show_expression?unique_id=Cirobu.g00015011	https://www.aniseed.cnrs.fr/aniseed/gene/show_gene?unique_id=Cirobu.g00015011	http://ghost.zool.kyoto-u.ac.jp/cgi-bin/fordetailkh21.cgi?name=KH.S761.9;source=kh2013
KH.S563.4	KH2013:KH.S563.4_BARHL1/2	HMX1; HMX2; HMX3	Cirobu.g00014699	2.25841	1.90988	0.033632	-2.7808	0.00481084	0	https://www.aniseed.cnrs.fr/aniseed/gene/show_expression?unique_id=Cirobu.g00014699	https://www.aniseed.cnrs.fr/aniseed/gene/show_gene?unique_id=Cirobu.g00014699	http://ghost.zool.kyoto-u.ac.jp/cgi-bin/fordetailkh21.cgi?name=KH.S563.4;source=kh2013
KH.L96.18	CRELD1/2	CRELD1; CRELD2; HMCN1	Cirobu.g00013359	7.68976	1.90489	9.08e-07	-0.380531	0.313159	8	https://www.aniseed.cnrs.fr/aniseed/gene/show_expression?unique_id=Cirobu.g00013359	https://www.aniseed.cnrs.fr/aniseed/gene/show_gene?unique_id=Cirobu.g00013359	http://ghost.zool.kyoto-u.ac.jp/cgi-bin/fordetailkh21.cgi?name=KH.L96.18;source=kh2013
KH.S404.9	KH2013:KH.S404.9	KH.S404.9	Cirobu.g00014446	1.09941	1.90486	0.0303354	1.8425	0.0349697	1	https://www.aniseed.cnrs.fr/aniseed/gene/show_expression?unique_id=Cirobu.g00014446	https://www.aniseed.cnrs.fr/aniseed/gene/show_gene?unique_id=Cirobu.g00014446	http://ghost.zool.kyoto-u.ac.jp/cgi-bin/fordetailkh21.cgi?name=KH.S404.9;source=kh2013
KH.C7.814	KH2013:KH.C7.814	KH.C7.814	Cirobu.g00008681	2.21761	1.89581	0.100346	-1.29185	0.25783	0	https://www.aniseed.cnrs.fr/aniseed/gene/show_expression?unique_id=Cirobu.g00008681	https://www.aniseed.cnrs.fr/aniseed/gene/show_gene?unique_id=Cirobu.g00008681	http://ghost.zool.kyoto-u.ac.jp/cgi-bin/fordetailkh21.cgi?name=KH.C7.814;source=kh2013
KH.C12.124	KH2013:KH.C12.124	KH.C12.124	Cirobu.g00002650	1.96958	1.8921	0.00517651	-4.37172	3.96e-06	0	https://www.aniseed.cnrs.fr/aniseed/gene/show_expression?unique_id=Cirobu.g00002650	https://www.aniseed.cnrs.fr/aniseed/gene/show_gene?unique_id=Cirobu.g00002650	http://ghost.zool.kyoto-u.ac.jp/cgi-bin/fordetailkh21.cgi?name=KH.C12.124;source=kh2013
KH.L10.20	KH2013:KH.L10.20	KH.L10.20	Cirobu.g00010510	0.982696	1.8907	0.226321	1.43309	0.367757	0	https://www.aniseed.cnrs.fr/aniseed/gene/show_expression?unique_id=Cirobu.g00010510	https://www.aniseed.cnrs.fr/aniseed/gene/show_gene?unique_id=Cirobu.g00010510	http://ghost.zool.kyoto-u.ac.jp/cgi-bin/fordetailkh21.cgi?name=KH.L10.20;source=kh2013
KH.C12.65	KIAA1324L	KIAA1324; KIAA1324L	Cirobu.g00003225	7.39662	1.88467	3.12e-05	-0.643209	0.144599	6	https://www.aniseed.cnrs.fr/aniseed/gene/show_expression?unique_id=Cirobu.g00003225	https://www.aniseed.cnrs.fr/aniseed/gene/show_gene?unique_id=Cirobu.g00003225	http://ghost.zool.kyoto-u.ac.jp/cgi-bin/fordetailkh21.cgi?name=KH.C12.65;source=kh2013
KH.C2.794	KH2013:KH.C2.794	KH.C2.794	Cirobu.g00005024	4.42305	1.87938	6.9e-06	0.0365413	0.93206	0	https://www.aniseed.cnrs.fr/aniseed/gene/show_expression?unique_id=Cirobu.g00005024	https://www.aniseed.cnrs.fr/aniseed/gene/show_gene?unique_id=Cirobu.g00005024	http://ghost.zool.kyoto-u.ac.jp/cgi-bin/fordetailkh21.cgi?name=KH.C2.794;source=kh2013
KH.C5.79	VSTM2A	BSG; NPTN; VSIG2	Cirobu.g00007590	3.8437	1.87615	0.000220396	-1.85585	0.000444283	0	https://www.aniseed.cnrs.fr/aniseed/gene/show_expression?unique_id=Cirobu.g00007590	https://www.aniseed.cnrs.fr/aniseed/gene/show_gene?unique_id=Cirobu.g00007590	http://ghost.zool.kyoto-u.ac.jp/cgi-bin/fordetailkh21.cgi?name=KH.C5.79;source=kh2013
KH.C10.88	NTNG1/2	NTN1; NTNG1; NTNG2	Cirobu.g00001891	4.38912	1.8663	0.0138599	-0.761989	0.303654	0	https://www.aniseed.cnrs.fr/aniseed/gene/show_expression?unique_id=Cirobu.g00001891	https://www.aniseed.cnrs.fr/aniseed/gene/show_gene?unique_id=Cirobu.g00001891	http://ghost.zool.kyoto-u.ac.jp/cgi-bin/fordetailkh21.cgi?name=KH.C10.88;source=kh2013
KH.C8.280	KH2013:KH.C8.280	KH.C8.280	Cirobu.g00008901	3.23041	1.862	0.000229085	-0.333451	0.525477	13	https://www.aniseed.cnrs.fr/aniseed/gene/show_expression?unique_id=Cirobu.g00008901	https://www.aniseed.cnrs.fr/aniseed/gene/show_gene?unique_id=Cirobu.g00008901	http://ghost.zool.kyoto-u.ac.jp/cgi-bin/fordetailkh21.cgi?name=KH.C8.280;source=kh2013
KH.C1.365	KH2013:KH.C1.365	KH.C1.365	Cirobu.g00000598	4.06838	1.86141	0.00473408	-0.116822	0.861085	0	https://www.aniseed.cnrs.fr/aniseed/gene/show_expression?unique_id=Cirobu.g00000598	https://www.aniseed.cnrs.fr/aniseed/gene/show_gene?unique_id=Cirobu.g00000598	http://ghost.zool.kyoto-u.ac.jp/cgi-bin/fordetailkh21.cgi?name=KH.C1.365;source=kh2013
KH.C6.103	KH2013:KH.C6.103_OSBPL9	OSBPL9	Cirobu.g00007618	4.76239	1.85555	0.00196916	-0.76738	0.190542	1	https://www.aniseed.cnrs.fr/aniseed/gene/show_expression?unique_id=Cirobu.g00007618	https://www.aniseed.cnrs.fr/aniseed/gene/show_gene?unique_id=Cirobu.g00007618	http://ghost.zool.kyoto-u.ac.jp/cgi-bin/fordetailkh21.cgi?name=KH.C6.103;source=kh2013
KH.L40.28	KH2013:KH.L40.28_TLR5B	TLR4; TLR5; TLR7	Cirobu.g00012553	1.48413	1.85526	0.0488581	-0.805595	0.407912	0	https://www.aniseed.cnrs.fr/aniseed/gene/show_expression?unique_id=Cirobu.g00012553	https://www.aniseed.cnrs.fr/aniseed/gene/show_gene?unique_id=Cirobu.g00012553	http://ghost.zool.kyoto-u.ac.jp/cgi-bin/fordetailkh21.cgi?name=KH.L40.28;source=kh2013
KH.C3.439	CDCP2	BMP1; CDCP2; CUBN	Cirobu.g00005619	7.91858	1.85263	1.93e-05	-0.68667	0.104632	6	https://www.aniseed.cnrs.fr/aniseed/gene/show_expression?unique_id=Cirobu.g00005619	https://www.aniseed.cnrs.fr/aniseed/gene/show_gene?unique_id=Cirobu.g00005619	http://ghost.zool.kyoto-u.ac.jp/cgi-bin/fordetailkh21.cgi?name=KH.C3.439;source=kh2013
KH.C2.193	DCAF10	DCAF10; POC1A; SNRNP40	Cirobu.g00004368	0.744213	1.84798	0.0172801	0.401874	0.62006	0	https://www.aniseed.cnrs.fr/aniseed/gene/show_expression?unique_id=Cirobu.g00004368	https://www.aniseed.cnrs.fr/aniseed/gene/show_gene?unique_id=Cirobu.g00004368	http://ghost.zool.kyoto-u.ac.jp/cgi-bin/fordetailkh21.cgi?name=KH.C2.193;source=kh2013
KH.C5.558	RIMBP2/3	RIMBP2; RIMBP3; TSPOAP1	Cirobu.g00007455	6.15054	1.84572	0.0110771	0.766672	0.279897	0	https://www.aniseed.cnrs.fr/aniseed/gene/show_expression?unique_id=Cirobu.g00007455	https://www.aniseed.cnrs.fr/aniseed/gene/show_gene?unique_id=Cirobu.g00007455	http://ghost.zool.kyoto-u.ac.jp/cgi-bin/fordetailkh21.cgi?name=KH.C5.558;source=kh2013
KH.L18.39	FBXA-128	HECTD1; MIB1; MIB2	Cirobu.g00011976	6.55146	1.84058	1.03e-06	-0.453057	0.220919	11	https://www.aniseed.cnrs.fr/aniseed/gene/show_expression?unique_id=Cirobu.g00011976	https://www.aniseed.cnrs.fr/aniseed/gene/show_gene?unique_id=Cirobu.g00011976	http://ghost.zool.kyoto-u.ac.jp/cgi-bin/fordetailkh21.cgi?name=KH.L18.39;source=kh2013
KH.C14.527	VWA3B	ITIH4; VWA3A; VWA3B	Cirobu.g00003970	2.8021	1.84005	0.165653	-0.815889	0.537499	0	https://www.aniseed.cnrs.fr/aniseed/gene/show_expression?unique_id=Cirobu.g00003970	https://www.aniseed.cnrs.fr/aniseed/gene/show_gene?unique_id=Cirobu.g00003970	http://ghost.zool.kyoto-u.ac.jp/cgi-bin/fordetailkh21.cgi?name=KH.C14.527;source=kh2013
KH.C8.353	SLC7A6OS	SLC7A6OS	Cirobu.g00008978	6.20077	1.83827	2.84e-07	-0.184639	0.601813	4	https://www.aniseed.cnrs.fr/aniseed/gene/show_expression?unique_id=Cirobu.g00008978	https://www.aniseed.cnrs.fr/aniseed/gene/show_gene?unique_id=Cirobu.g00008978	http://ghost.zool.kyoto-u.ac.jp/cgi-bin/fordetailkh21.cgi?name=KH.C8.353;source=kh2013
KH.C10.198	KH2013:KH.C10.198_CDH-5	CDH11; CDH7; PCDH1	Cirobu.g00001398	2.95142	1.83596	0.0175384	-0.404328	0.594502	9	https://www.aniseed.cnrs.fr/aniseed/gene/show_expression?unique_id=Cirobu.g00001398	https://www.aniseed.cnrs.fr/aniseed/gene/show_gene?unique_id=Cirobu.g00001398	http://ghost.zool.kyoto-u.ac.jp/cgi-bin/fordetailkh21.cgi?name=KH.C10.198;source=kh2013
KH.C2.561	YWHAG/1	YWHAB; YWHAG; YWHAQ	Cirobu.g00004772	6.82686	1.83189	0.000838416	0.198591	0.711338	1	https://www.aniseed.cnrs.fr/aniseed/gene/show_expression?unique_id=Cirobu.g00004772	https://www.aniseed.cnrs.fr/aniseed/gene/show_gene?unique_id=Cirobu.g00004772	http://ghost.zool.kyoto-u.ac.jp/cgi-bin/fordetailkh21.cgi?name=KH.C2.561;source=kh2013
KH.C1.744	HMGA2	HMGA2	Cirobu.g00001013	3.21107	1.82887	0.00632396	0.254041	0.707331	0	https://www.aniseed.cnrs.fr/aniseed/gene/show_expression?unique_id=Cirobu.g00001013	https://www.aniseed.cnrs.fr/aniseed/gene/show_gene?unique_id=Cirobu.g00001013	http://ghost.zool.kyoto-u.ac.jp/cgi-bin/fordetailkh21.cgi?name=KH.C1.744;source=kh2013
KH.C8.6	KH2013:KH.C8.6	KH.C8.6	Cirobu.g00009248	0.714082	1.82519	0.0447055	0.545728	0.568428	0	https://www.aniseed.cnrs.fr/aniseed/gene/show_expression?unique_id=Cirobu.g00009248	https://www.aniseed.cnrs.fr/aniseed/gene/show_gene?unique_id=Cirobu.g00009248	http://ghost.zool.kyoto-u.ac.jp/cgi-bin/fordetailkh21.cgi?name=KH.C8.6;source=kh2013
KH.C10.195	ABHD1/3	ABHD1; ABHD2; ABHD3	Cirobu.g00001395	4.05786	1.81815	0.000270265	-0.574923	0.246689	0	https://www.aniseed.cnrs.fr/aniseed/gene/show_expression?unique_id=Cirobu.g00001395	https://www.aniseed.cnrs.fr/aniseed/gene/show_gene?unique_id=Cirobu.g00001395	http://ghost.zool.kyoto-u.ac.jp/cgi-bin/fordetailkh21.cgi?name=KH.C10.195;source=kh2013
KH.C4.244	KH2013:KH.C4.244	DMGDH; PIPOX; SARDH	Cirobu.g00006320	0.578614	1.8177	0.261341	0.520305	0.780857	0	https://www.aniseed.cnrs.fr/aniseed/gene/show_expression?unique_id=Cirobu.g00006320	https://www.aniseed.cnrs.fr/aniseed/gene/show_gene?unique_id=Cirobu.g00006320	http://ghost.zool.kyoto-u.ac.jp/cgi-bin/fordetailkh21.cgi?name=KH.C4.244;source=kh2013
KH.C1.568	Ci-Endo2	KH.C1.568	Cirobu.g00000818	3.73476	1.81744	0.00508938	-0.641129	0.318833	0	https://www.aniseed.cnrs.fr/aniseed/gene/show_expression?unique_id=Cirobu.g00000818	https://www.aniseed.cnrs.fr/aniseed/gene/show_gene?unique_id=Cirobu.g00000818	http://ghost.zool.kyoto-u.ac.jp/cgi-bin/fordetailkh21.cgi?name=KH.C1.568;source=kh2013
KH.C1.583	CACNA2D3/4	CACNA2D2; CACNA2D3; CACNA2D4	Cirobu.g00000834	5.01549	1.81515	0.00147428	-0.694772	0.215677	1	https://www.aniseed.cnrs.fr/aniseed/gene/show_expression?unique_id=Cirobu.g00000834	https://www.aniseed.cnrs.fr/aniseed/gene/show_gene?unique_id=Cirobu.g00000834	http://ghost.zool.kyoto-u.ac.jp/cgi-bin/fordetailkh21.cgi?name=KH.C1.583;source=kh2013
KH.C8.470	F35B12.4	TFPI; TFPI2; WFIKKN2	Cirobu.g00009108	1.43482	1.8142	0.116888	-0.973293	0.407664	2	https://www.aniseed.cnrs.fr/aniseed/gene/show_expression?unique_id=Cirobu.g00009108	https://www.aniseed.cnrs.fr/aniseed/gene/show_gene?unique_id=Cirobu.g00009108	http://ghost.zool.kyoto-u.ac.jp/cgi-bin/fordetailkh21.cgi?name=KH.C8.470;source=kh2013
KH.C10.274	ZIG-2/3/4/5	NEGR1; NTM; OPCML	Cirobu.g00001483	5.54112	1.80915	0.00328643	-1.33742	0.029086	0	https://www.aniseed.cnrs.fr/aniseed/gene/show_expression?unique_id=Cirobu.g00001483	https://www.aniseed.cnrs.fr/aniseed/gene/show_gene?unique_id=Cirobu.g00001483	http://ghost.zool.kyoto-u.ac.jp/cgi-bin/fordetailkh21.cgi?name=KH.C10.274;source=kh2013
KH.C4.494	SIGLEC1	HMCN1; HSPG2; NECTIN3	Cirobu.g00006591	5.6197	1.80422	0.0716229	-0.101233	0.916811	0	https://www.aniseed.cnrs.fr/aniseed/gene/show_expression?unique_id=Cirobu.g00006591	https://www.aniseed.cnrs.fr/aniseed/gene/show_gene?unique_id=Cirobu.g00006591	http://ghost.zool.kyoto-u.ac.jp/cgi-bin/fordetailkh21.cgi?name=KH.C4.494;source=kh2013
KH.C9.697	CTNNAL1	CTNNA1; CTNNA2; CTNNAL1	Cirobu.g00010268	5.78422	1.79091	0.00169971	-0.237398	0.668555	1	https://www.aniseed.cnrs.fr/aniseed/gene/show_expression?unique_id=Cirobu.g00010268	https://www.aniseed.cnrs.fr/aniseed/gene/show_gene?unique_id=Cirobu.g00010268	http://ghost.zool.kyoto-u.ac.jp/cgi-bin/fordetailkh21.cgi?name=KH.C9.697;source=kh2013
KH.C2.319	KH2013:KH.C2.319	KH.C2.319	Cirobu.g00004506	3.84903	1.7868	0.0161887	0.591988	0.418222	0	https://www.aniseed.cnrs.fr/aniseed/gene/show_expression?unique_id=Cirobu.g00004506	https://www.aniseed.cnrs.fr/aniseed/gene/show_gene?unique_id=Cirobu.g00004506	http://ghost.zool.kyoto-u.ac.jp/cgi-bin/fordetailkh21.cgi?name=KH.C2.319;source=kh2013
KH.C13.14	KH2013:KH.C13.14_ANXA7	ANXA11; ANXA13; ANXA7	Cirobu.g00003355	6.36563	1.78085	0.00385701	-0.0221366	0.971987	1	https://www.aniseed.cnrs.fr/aniseed/gene/show_expression?unique_id=Cirobu.g00003355	https://www.aniseed.cnrs.fr/aniseed/gene/show_gene?unique_id=Cirobu.g00003355	http://ghost.zool.kyoto-u.ac.jp/cgi-bin/fordetailkh21.cgi?name=KH.C13.14;source=kh2013
KH.C8.448	AKR1B1/10/15/7/8	AKR1A1; AKR1B1; AKR1B10	Cirobu.g00009083	1.66362	1.77681	0.0788385	-2.83549	0.00981215	0	https://www.aniseed.cnrs.fr/aniseed/gene/show_expression?unique_id=Cirobu.g00009083	https://www.aniseed.cnrs.fr/aniseed/gene/show_gene?unique_id=Cirobu.g00009083	http://ghost.zool.kyoto-u.ac.jp/cgi-bin/fordetailkh21.cgi?name=KH.C8.448;source=kh2013
KH.C11.232	KH2013:KH.C11.232_FUT8	FUT8	Cirobu.g00002049	4.82798	1.76515	0.00349315	-0.410657	0.486675	0	https://www.aniseed.cnrs.fr/aniseed/gene/show_expression?unique_id=Cirobu.g00002049	https://www.aniseed.cnrs.fr/aniseed/gene/show_gene?unique_id=Cirobu.g00002049	http://ghost.zool.kyoto-u.ac.jp/cgi-bin/fordetailkh21.cgi?name=KH.C11.232;source=kh2013
KH.C3.868	MID1	BTN2A1; MID1; MID2	Cirobu.g00006079	4.91801	1.76412	0.299529	-1.17929	0.481667	0	https://www.aniseed.cnrs.fr/aniseed/gene/show_expression?unique_id=Cirobu.g00006079	https://www.aniseed.cnrs.fr/aniseed/gene/show_gene?unique_id=Cirobu.g00006079	http://ghost.zool.kyoto-u.ac.jp/cgi-bin/fordetailkh21.cgi?name=KH.C3.868;source=kh2013
KH.C9.478	SYT9	SYT2; SYT5; SYT9	Cirobu.g00010027	6.07216	1.76157	0.0125988	-0.696459	0.316107	3	https://www.aniseed.cnrs.fr/aniseed/gene/show_expression?unique_id=Cirobu.g00010027	https://www.aniseed.cnrs.fr/aniseed/gene/show_gene?unique_id=Cirobu.g00010027	http://ghost.zool.kyoto-u.ac.jp/cgi-bin/fordetailkh21.cgi?name=KH.C9.478;source=kh2013
KH.C10.339	ANGPT1/2	ANGPT1; ANGPT2; FGL1	Cirobu.g00001551	-0.068242	1.76068	0.116885	0.782218	0.557141	1	https://www.aniseed.cnrs.fr/aniseed/gene/show_expression?unique_id=Cirobu.g00001551	https://www.aniseed.cnrs.fr/aniseed/gene/show_gene?unique_id=Cirobu.g00001551	http://ghost.zool.kyoto-u.ac.jp/cgi-bin/fordetailkh21.cgi?name=KH.C10.339;source=kh2013
KH.L18.116	FAM124A	FAM124A; FAM124B	Cirobu.g00011921	4.12869	1.75896	0.00508118	-0.48976	0.426142	0	https://www.aniseed.cnrs.fr/aniseed/gene/show_expression?unique_id=Cirobu.g00011921	https://www.aniseed.cnrs.fr/aniseed/gene/show_gene?unique_id=Cirobu.g00011921	http://ghost.zool.kyoto-u.ac.jp/cgi-bin/fordetailkh21.cgi?name=KH.L18.116;source=kh2013
KH.C8.468	KH2013:KH.C8.468	KH.C8.468	Cirobu.g00009105	-0.30536	1.75034	0.11639	1.08662	0.384864	0	https://www.aniseed.cnrs.fr/aniseed/gene/show_expression?unique_id=Cirobu.g00009105	https://www.aniseed.cnrs.fr/aniseed/gene/show_gene?unique_id=Cirobu.g00009105	http://ghost.zool.kyoto-u.ac.jp/cgi-bin/fordetailkh21.cgi?name=KH.C8.468;source=kh2013
KH.C3.390	KH2013:KH.C3.390_DSCAM/2/3/4	IGFN1; IGSF22; TTN	Cirobu.g00005567	3.36741	1.74909	0.00536352	0.673703	0.279899	0	https://www.aniseed.cnrs.fr/aniseed/gene/show_expression?unique_id=Cirobu.g00005567	https://www.aniseed.cnrs.fr/aniseed/gene/show_gene?unique_id=Cirobu.g00005567	http://ghost.zool.kyoto-u.ac.jp/cgi-bin/fordetailkh21.cgi?name=KH.C3.390;source=kh2013
KH.C7.208	KH2013:KH.C7.208_GJC1	GJA8; GJC1; GJC2	Cirobu.g00008034	3.48328	1.74652	0.0744083	-1.29083	0.180038	0	https://www.aniseed.cnrs.fr/aniseed/gene/show_expression?unique_id=Cirobu.g00008034	https://www.aniseed.cnrs.fr/aniseed/gene/show_gene?unique_id=Cirobu.g00008034	http://ghost.zool.kyoto-u.ac.jp/cgi-bin/fordetailkh21.cgi?name=KH.C7.208;source=kh2013
KH.C2.1091	GCNT2	GCNT1; GCNT2; GCNT3	Cirobu.g00004214	1.47697	1.74023	0.131259	-2.84456	0.0215466	0	https://www.aniseed.cnrs.fr/aniseed/gene/show_expression?unique_id=Cirobu.g00004214	https://www.aniseed.cnrs.fr/aniseed/gene/show_gene?unique_id=Cirobu.g00004214	http://ghost.zool.kyoto-u.ac.jp/cgi-bin/fordetailkh21.cgi?name=KH.C2.1091;source=kh2013
KH.S691.1	KH2013:KH.S691.1	CHRM1; CHRM2; CHRM4	Cirobu.g00014932	1.37461	1.73555	0.168299	-1.70248	0.182018	0	https://www.aniseed.cnrs.fr/aniseed/gene/show_expression?unique_id=Cirobu.g00014932	https://www.aniseed.cnrs.fr/aniseed/gene/show_gene?unique_id=Cirobu.g00014932	http://ghost.zool.kyoto-u.ac.jp/cgi-bin/fordetailkh21.cgi?name=KH.S691.1;source=kh2013
KH.C4.777	KH2013:KH.C4.777_KRTAP9-1/2/3/4/6/7/8/9	CFH; CSMD1; SVEP1	Cirobu.g00006899	2.09267	1.73491	0.0239409	-0.941042	0.236933	0	https://www.aniseed.cnrs.fr/aniseed/gene/show_expression?unique_id=Cirobu.g00006899	https://www.aniseed.cnrs.fr/aniseed/gene/show_gene?unique_id=Cirobu.g00006899	http://ghost.zool.kyoto-u.ac.jp/cgi-bin/fordetailkh21.cgi?name=KH.C4.777;source=kh2013
KH.L147.13	KH2013:KH.L147.13	GJC1; GJC2; GJD2	Cirobu.g00011292	2.73283	1.73179	0.0896895	-0.541444	0.586106	0	https://www.aniseed.cnrs.fr/aniseed/gene/show_expression?unique_id=Cirobu.g00011292	https://www.aniseed.cnrs.fr/aniseed/gene/show_gene?unique_id=Cirobu.g00011292	http://ghost.zool.kyoto-u.ac.jp/cgi-bin/fordetailkh21.cgi?name=KH.L147.13;source=kh2013
KH.C1.852	RDL1	TSTD1	Cirobu.g00001132	1.20151	1.73109	0.012101	0.368419	0.667357	0	https://www.aniseed.cnrs.fr/aniseed/gene/show_expression?unique_id=Cirobu.g00001132	https://www.aniseed.cnrs.fr/aniseed/gene/show_gene?unique_id=Cirobu.g00001132	http://ghost.zool.kyoto-u.ac.jp/cgi-bin/fordetailkh21.cgi?name=KH.C1.852;source=kh2013
KH.L108.15	STX2/3	STX1A; STX1B; STX2	Cirobu.g00010608	7.01334	1.72903	0.000438256	-0.876114	0.0700061	0	https://www.aniseed.cnrs.fr/aniseed/gene/show_expression?unique_id=Cirobu.g00010608	https://www.aniseed.cnrs.fr/aniseed/gene/show_gene?unique_id=Cirobu.g00010608	http://ghost.zool.kyoto-u.ac.jp/cgi-bin/fordetailkh21.cgi?name=KH.L108.15;source=kh2013
KH.C5.253	KCNIP1/2/3/4	KCNIP2; KCNIP3; KCNIP4	Cirobu.g00007124	4.09067	1.72773	0.00171053	0.524038	0.335874	0	https://www.aniseed.cnrs.fr/aniseed/gene/show_expression?unique_id=Cirobu.g00007124	https://www.aniseed.cnrs.fr/aniseed/gene/show_gene?unique_id=Cirobu.g00007124	http://ghost.zool.kyoto-u.ac.jp/cgi-bin/fordetailkh21.cgi?name=KH.C5.253;source=kh2013
KH.L90.5	DUSP15/22	DUSP15; DUSP22; DUSP9	Cirobu.g00013284	4.12011	1.7248	2.56e-05	-0.413489	0.325185	0	https://www.aniseed.cnrs.fr/aniseed/gene/show_expression?unique_id=Cirobu.g00013284	https://www.aniseed.cnrs.fr/aniseed/gene/show_gene?unique_id=Cirobu.g00013284	http://ghost.zool.kyoto-u.ac.jp/cgi-bin/fordetailkh21.cgi?name=KH.L90.5;source=kh2013
KH.C3.811	Ci-4domain	KH.C3.811	Cirobu.g00006019	1.03002	1.72053	0.0790986	-0.693063	0.533721	1	https://www.aniseed.cnrs.fr/aniseed/gene/show_expression?unique_id=Cirobu.g00006019	https://www.aniseed.cnrs.fr/aniseed/gene/show_gene?unique_id=Cirobu.g00006019	http://ghost.zool.kyoto-u.ac.jp/cgi-bin/fordetailkh21.cgi?name=KH.C3.811;source=kh2013
KH.L22.65	KH2013:KH.L22.65	ZBED1; ZBED4; ZNF618	Cirobu.g00012182	2.0248	1.71388	0.0354462	-0.248754	0.775208	9	https://www.aniseed.cnrs.fr/aniseed/gene/show_expression?unique_id=Cirobu.g00012182	https://www.aniseed.cnrs.fr/aniseed/gene/show_gene?unique_id=Cirobu.g00012182	http://ghost.zool.kyoto-u.ac.jp/cgi-bin/fordetailkh21.cgi?name=KH.L22.65;source=kh2013
KH.C2.338	CG5844	ECH1; ECHDC2; ECHS1	Cirobu.g00004527	3.50244	1.71136	0.0046764	-0.191043	0.761303	2	https://www.aniseed.cnrs.fr/aniseed/gene/show_expression?unique_id=Cirobu.g00004527	https://www.aniseed.cnrs.fr/aniseed/gene/show_gene?unique_id=Cirobu.g00004527	http://ghost.zool.kyoto-u.ac.jp/cgi-bin/fordetailkh21.cgi?name=KH.C2.338;source=kh2013
KH.C7.22	TNFSF12/13	EDA; TNFSF12; TNFSF13	Cirobu.g00008047	1.19634	1.71026	0.0195853	-0.426243	0.642255	0	https://www.aniseed.cnrs.fr/aniseed/gene/show_expression?unique_id=Cirobu.g00008047	https://www.aniseed.cnrs.fr/aniseed/gene/show_gene?unique_id=Cirobu.g00008047	http://ghost.zool.kyoto-u.ac.jp/cgi-bin/fordetailkh21.cgi?name=KH.C7.22;source=kh2013
KH.C2.1033	SOCS2	KH.C2.1033	Cirobu.g00004150	3.02748	1.70976	0.0374896	0.537551	0.512222	0	https://www.aniseed.cnrs.fr/aniseed/gene/show_expression?unique_id=Cirobu.g00004150	https://www.aniseed.cnrs.fr/aniseed/gene/show_gene?unique_id=Cirobu.g00004150	http://ghost.zool.kyoto-u.ac.jp/cgi-bin/fordetailkh21.cgi?name=KH.C2.1033;source=kh2013
KH.C7.364	PRKX	PRKACA; PRKACB; PRKX	Cirobu.g00008204	4.68315	1.70708	0.00470085	-0.702584	0.235911	0	https://www.aniseed.cnrs.fr/aniseed/gene/show_expression?unique_id=Cirobu.g00008204	https://www.aniseed.cnrs.fr/aniseed/gene/show_gene?unique_id=Cirobu.g00008204	http://ghost.zool.kyoto-u.ac.jp/cgi-bin/fordetailkh21.cgi?name=KH.C7.364;source=kh2013
KH.L170.35	KH2013:KH.L170.35	KH.L170.35	Cirobu.g00011771	1.30016	1.70672	0.126889	1.14088	0.31473	0	https://www.aniseed.cnrs.fr/aniseed/gene/show_expression?unique_id=Cirobu.g00011771	https://www.aniseed.cnrs.fr/aniseed/gene/show_gene?unique_id=Cirobu.g00011771	http://ghost.zool.kyoto-u.ac.jp/cgi-bin/fordetailkh21.cgi?name=KH.L170.35;source=kh2013
KH.L18.89	CD97	ADGRG2; ADGRG4; ADGRG6	Cirobu.g00012031	3.41752	1.70336	0.105703	-0.180229	0.863666	1	https://www.aniseed.cnrs.fr/aniseed/gene/show_expression?unique_id=Cirobu.g00012031	https://www.aniseed.cnrs.fr/aniseed/gene/show_gene?unique_id=Cirobu.g00012031	http://ghost.zool.kyoto-u.ac.jp/cgi-bin/fordetailkh21.cgi?name=KH.L18.89;source=kh2013
KH.C2.866	KH2013:KH.C2.866	KH.C2.866	Cirobu.g00005104	2.44139	1.70017	0.100409	-0.132085	0.892843	3	https://www.aniseed.cnrs.fr/aniseed/gene/show_expression?unique_id=Cirobu.g00005104	https://www.aniseed.cnrs.fr/aniseed/gene/show_gene?unique_id=Cirobu.g00005104	http://ghost.zool.kyoto-u.ac.jp/cgi-bin/fordetailkh21.cgi?name=KH.C2.866;source=kh2013
KH.C2.283	LRRC51/6	DRC3; LRRC6; SNRPA1	Cirobu.g00004466	0.202579	1.69797	0.251175	0.706787	0.678033	0	https://www.aniseed.cnrs.fr/aniseed/gene/show_expression?unique_id=Cirobu.g00004466	https://www.aniseed.cnrs.fr/aniseed/gene/show_gene?unique_id=Cirobu.g00004466	http://ghost.zool.kyoto-u.ac.jp/cgi-bin/fordetailkh21.cgi?name=KH.C2.283;source=kh2013
KH.C10.528	KH2013:KH.C10.528	KH.C10.528	Cirobu.g00001755	5.98947	1.69769	0.0145978	-0.554522	0.415109	4	https://www.aniseed.cnrs.fr/aniseed/gene/show_expression?unique_id=Cirobu.g00001755	https://www.aniseed.cnrs.fr/aniseed/gene/show_gene?unique_id=Cirobu.g00001755	http://ghost.zool.kyoto-u.ac.jp/cgi-bin/fordetailkh21.cgi?name=KH.C10.528;source=kh2013
KH.C3.421	KH2013:KH.C3.421_MFSD6	MFSD6	Cirobu.g00005600	6.39502	1.69526	7.88e-07	-0.704847	0.0384897	0	https://www.aniseed.cnrs.fr/aniseed/gene/show_expression?unique_id=Cirobu.g00005600	https://www.aniseed.cnrs.fr/aniseed/gene/show_gene?unique_id=Cirobu.g00005600	http://ghost.zool.kyoto-u.ac.jp/cgi-bin/fordetailkh21.cgi?name=KH.C3.421;source=kh2013
KH.C2.572	KH2013:KH.C2.572_CLEC-150	KLRB1	Cirobu.g00004784	1.2079	1.69404	0.108335	-0.491132	0.648583	0	https://www.aniseed.cnrs.fr/aniseed/gene/show_expression?unique_id=Cirobu.g00004784	https://www.aniseed.cnrs.fr/aniseed/gene/show_gene?unique_id=Cirobu.g00004784	http://ghost.zool.kyoto-u.ac.jp/cgi-bin/fordetailkh21.cgi?name=KH.C2.572;source=kh2013
KH.L84.11	KH2013:KH.L84.11	KH.L84.11	Cirobu.g00013136	0.884057	1.69003	0.114696	1.10681	0.319812	2	https://www.aniseed.cnrs.fr/aniseed/gene/show_expression?unique_id=Cirobu.g00013136	https://www.aniseed.cnrs.fr/aniseed/gene/show_gene?unique_id=Cirobu.g00013136	http://ghost.zool.kyoto-u.ac.jp/cgi-bin/fordetailkh21.cgi?name=KH.L84.11;source=kh2013
KH.C3.679	KH2013:KH.C3.679	KH.C3.679	Cirobu.g00005877	0.538731	1.688	0.149612	-0.489175	0.69259	0	https://www.aniseed.cnrs.fr/aniseed/gene/show_expression?unique_id=Cirobu.g00005877	https://www.aniseed.cnrs.fr/aniseed/gene/show_gene?unique_id=Cirobu.g00005877	http://ghost.zool.kyoto-u.ac.jp/cgi-bin/fordetailkh21.cgi?name=KH.C3.679;source=kh2013
KH.L147.36	KH2013:KH.L147.36_GJC2	AL139260.3; GJA3; GJD2	Cirobu.g00011316	2.29405	1.68263	0.121193	0.0221393	1	0	https://www.aniseed.cnrs.fr/aniseed/gene/show_expression?unique_id=Cirobu.g00011316	https://www.aniseed.cnrs.fr/aniseed/gene/show_gene?unique_id=Cirobu.g00011316	http://ghost.zool.kyoto-u.ac.jp/cgi-bin/fordetailkh21.cgi?name=KH.L147.36;source=kh2013
KH.L141.7	KH2013:KH.L141.7	KH.L141.7	Cirobu.g00011226	7.27384	1.68235	0.00209242	-0.456327	0.393619	0	https://www.aniseed.cnrs.fr/aniseed/gene/show_expression?unique_id=Cirobu.g00011226	https://www.aniseed.cnrs.fr/aniseed/gene/show_gene?unique_id=Cirobu.g00011226	http://ghost.zool.kyoto-u.ac.jp/cgi-bin/fordetailkh21.cgi?name=KH.L141.7;source=kh2013
KH.L135.1	UNC79	UNC79	Cirobu.g00011104	7.1766	1.68173	0.00119178	-1.31977	0.0103703	4	https://www.aniseed.cnrs.fr/aniseed/gene/show_expression?unique_id=Cirobu.g00011104	https://www.aniseed.cnrs.fr/aniseed/gene/show_gene?unique_id=Cirobu.g00011104	http://ghost.zool.kyoto-u.ac.jp/cgi-bin/fordetailkh21.cgi?name=KH.L135.1;source=kh2013
KH.C4.529	MRPL20	KH.C4.529	Cirobu.g00006628	3.2186	1.68157	0.00855909	0.810274	0.200777	5	https://www.aniseed.cnrs.fr/aniseed/gene/show_expression?unique_id=Cirobu.g00006628	https://www.aniseed.cnrs.fr/aniseed/gene/show_gene?unique_id=Cirobu.g00006628	http://ghost.zool.kyoto-u.ac.jp/cgi-bin/fordetailkh21.cgi?name=KH.C4.529;source=kh2013
KH.C4.729	KH2013:KH.C4.729_DUR3	SLC5A5; SLC5A8	Cirobu.g00006847	0.0174261	1.67805	0.125241	-3.06841	0.030863	0	https://www.aniseed.cnrs.fr/aniseed/gene/show_expression?unique_id=Cirobu.g00006847	https://www.aniseed.cnrs.fr/aniseed/gene/show_gene?unique_id=Cirobu.g00006847	http://ghost.zool.kyoto-u.ac.jp/cgi-bin/fordetailkh21.cgi?name=KH.C4.729;source=kh2013
KH.L170.62	KH2013:KH.L170.62_SORD	ADH1A; ADH5; SORD	Cirobu.g00011800	5.25873	1.67382	0.0809146	-1.29643	0.173328	0	https://www.aniseed.cnrs.fr/aniseed/gene/show_expression?unique_id=Cirobu.g00011800	https://www.aniseed.cnrs.fr/aniseed/gene/show_gene?unique_id=Cirobu.g00011800	http://ghost.zool.kyoto-u.ac.jp/cgi-bin/fordetailkh21.cgi?name=KH.L170.62;source=kh2013
KH.C3.900	KH2013:KH.C3.900_HTR2A	ADRB2; HTR2A; NPSR1	Cirobu.g00006115	1.46434	1.67305	0.0222282	0.0203302	1	0	https://www.aniseed.cnrs.fr/aniseed/gene/show_expression?unique_id=Cirobu.g00006115	https://www.aniseed.cnrs.fr/aniseed/gene/show_gene?unique_id=Cirobu.g00006115	http://ghost.zool.kyoto-u.ac.jp/cgi-bin/fordetailkh21.cgi?name=KH.C3.900;source=kh2013
KH.L59.7	KH2013:KH.L59.7_HMCN1	GLIPR1; HMCN1; PI16	Cirobu.g00012842	2.18485	1.67202	0.0835398	0.500525	0.618009	0	https://www.aniseed.cnrs.fr/aniseed/gene/show_expression?unique_id=Cirobu.g00012842	https://www.aniseed.cnrs.fr/aniseed/gene/show_gene?unique_id=Cirobu.g00012842	http://ghost.zool.kyoto-u.ac.jp/cgi-bin/fordetailkh21.cgi?name=KH.L59.7;source=kh2013
KH.C7.784	KH2013:KH.C7.784	KH.C7.784	Cirobu.g00008664	5.34351	1.66453	0.00108234	-0.0282274	0.957534	0	https://www.aniseed.cnrs.fr/aniseed/gene/show_expression?unique_id=Cirobu.g00008664	https://www.aniseed.cnrs.fr/aniseed/gene/show_gene?unique_id=Cirobu.g00008664	http://ghost.zool.kyoto-u.ac.jp/cgi-bin/fordetailkh21.cgi?name=KH.C7.784;source=kh2013
KH.C2.308	KH2013:KH.C2.308_MAM3	CNNM1; CNNM2; CNNM4	Cirobu.g00004494	0.210195	1.66187	0.0760467	0.864848	0.393848	0	https://www.aniseed.cnrs.fr/aniseed/gene/show_expression?unique_id=Cirobu.g00004494	https://www.aniseed.cnrs.fr/aniseed/gene/show_gene?unique_id=Cirobu.g00004494	http://ghost.zool.kyoto-u.ac.jp/cgi-bin/fordetailkh21.cgi?name=KH.C2.308;source=kh2013
KH.C10.260	NCAM1/2	HMCN1; NCAM1; NCAM2	Cirobu.g00001468	6.79173	1.65413	0.0343245	-0.556333	0.467028	0	https://www.aniseed.cnrs.fr/aniseed/gene/show_expression?unique_id=Cirobu.g00001468	https://www.aniseed.cnrs.fr/aniseed/gene/show_gene?unique_id=Cirobu.g00001468	http://ghost.zool.kyoto-u.ac.jp/cgi-bin/fordetailkh21.cgi?name=KH.C10.260;source=kh2013
KH.C3.506	ESAMA	KH.C3.506	Cirobu.g00005691	5.10486	1.65103	0.00492642	-1.16811	0.0481372	0	https://www.aniseed.cnrs.fr/aniseed/gene/show_expression?unique_id=Cirobu.g00005691	https://www.aniseed.cnrs.fr/aniseed/gene/show_gene?unique_id=Cirobu.g00005691	http://ghost.zool.kyoto-u.ac.jp/cgi-bin/fordetailkh21.cgi?name=KH.C3.506;source=kh2013
KH.C1.459	SH3PX1	SNX18; SNX33; SNX9	Cirobu.g00000701	7.29271	1.6491	2.89e-05	-0.657381	0.0907848	0	https://www.aniseed.cnrs.fr/aniseed/gene/show_expression?unique_id=Cirobu.g00000701	https://www.aniseed.cnrs.fr/aniseed/gene/show_gene?unique_id=Cirobu.g00000701	http://ghost.zool.kyoto-u.ac.jp/cgi-bin/fordetailkh21.cgi?name=KH.C1.459;source=kh2013
KH.C1.392	KH2013:KH.C1.392	KH.C1.392	Cirobu.g00000628	2.13111	1.64779	0.243232	3.89464	0.0083774	0	https://www.aniseed.cnrs.fr/aniseed/gene/show_expression?unique_id=Cirobu.g00000628	https://www.aniseed.cnrs.fr/aniseed/gene/show_gene?unique_id=Cirobu.g00000628	http://ghost.zool.kyoto-u.ac.jp/cgi-bin/fordetailkh21.cgi?name=KH.C1.392;source=kh2013
KH.C10.332	KH2013:KH.C10.332	KH.C10.332	Cirobu.g00001545	4.15811	1.64343	0.000881688	-0.92961	0.0654865	0	https://www.aniseed.cnrs.fr/aniseed/gene/show_expression?unique_id=Cirobu.g00001545	https://www.aniseed.cnrs.fr/aniseed/gene/show_gene?unique_id=Cirobu.g00001545	http://ghost.zool.kyoto-u.ac.jp/cgi-bin/fordetailkh21.cgi?name=KH.C10.332;source=kh2013
KH.L9.14	MAPK8IP1/2	GULP1; MAPK8IP1; MAPK8IP2	Cirobu.g00013240	6.10007	1.64154	5.82e-05	-0.605855	0.134573	0	https://www.aniseed.cnrs.fr/aniseed/gene/show_expression?unique_id=Cirobu.g00013240	https://www.aniseed.cnrs.fr/aniseed/gene/show_gene?unique_id=Cirobu.g00013240	http://ghost.zool.kyoto-u.ac.jp/cgi-bin/fordetailkh21.cgi?name=KH.L9.14;source=kh2013
KH.C11.607	LIS-1	PAFAH1B1; WDR5; WDR5B	Cirobu.g00002454	4.79933	1.64088	0.00188562	-0.806456	0.123378	2	https://www.aniseed.cnrs.fr/aniseed/gene/show_expression?unique_id=Cirobu.g00002454	https://www.aniseed.cnrs.fr/aniseed/gene/show_gene?unique_id=Cirobu.g00002454	http://ghost.zool.kyoto-u.ac.jp/cgi-bin/fordetailkh21.cgi?name=KH.C11.607;source=kh2013
KH.C9.154	KH2013:KH.C9.154_EFCAB3	CALM3; CALML3; SPATA21	Cirobu.g00009673	1.9058	1.64017	0.164556	0.839246	0.473627	0	https://www.aniseed.cnrs.fr/aniseed/gene/show_expression?unique_id=Cirobu.g00009673	https://www.aniseed.cnrs.fr/aniseed/gene/show_gene?unique_id=Cirobu.g00009673	http://ghost.zool.kyoto-u.ac.jp/cgi-bin/fordetailkh21.cgi?name=KH.C9.154;source=kh2013
KH.C5.62	KH2013:KH.C5.62_ODF3L2	ODF3; ODF3L1; ODF3L2	Cirobu.g00007524	4.17044	1.63935	0.0164112	-0.55228	0.415603	0	https://www.aniseed.cnrs.fr/aniseed/gene/show_expression?unique_id=Cirobu.g00007524	https://www.aniseed.cnrs.fr/aniseed/gene/show_gene?unique_id=Cirobu.g00007524	http://ghost.zool.kyoto-u.ac.jp/cgi-bin/fordetailkh21.cgi?name=KH.C5.62;source=kh2013
KH.C3.136	ARHGAP17/44	ARHGAP17; ARHGAP44; SH3BP1	Cirobu.g00005291	4.70852	1.63741	0.00163123	-0.412244	0.420634	0	https://www.aniseed.cnrs.fr/aniseed/gene/show_expression?unique_id=Cirobu.g00005291	https://www.aniseed.cnrs.fr/aniseed/gene/show_gene?unique_id=Cirobu.g00005291	http://ghost.zool.kyoto-u.ac.jp/cgi-bin/fordetailkh21.cgi?name=KH.C3.136;source=kh2013
KH.C7.223	P4HA2/3	P4HA1; P4HA2; P4HA3	Cirobu.g00008051	2.32721	1.63641	0.0263254	1.14937	0.11601	0	https://www.aniseed.cnrs.fr/aniseed/gene/show_expression?unique_id=Cirobu.g00008051	https://www.aniseed.cnrs.fr/aniseed/gene/show_gene?unique_id=Cirobu.g00008051	http://ghost.zool.kyoto-u.ac.jp/cgi-bin/fordetailkh21.cgi?name=KH.C7.223;source=kh2013
KH.C14.65	DCDC2B	DCDC2; DCDC2B; DCDC2C	Cirobu.g00004073	9.16985	1.63368	0.0108675	-0.700789	0.265047	0	https://www.aniseed.cnrs.fr/aniseed/gene/show_expression?unique_id=Cirobu.g00004073	https://www.aniseed.cnrs.fr/aniseed/gene/show_gene?unique_id=Cirobu.g00004073	http://ghost.zool.kyoto-u.ac.jp/cgi-bin/fordetailkh21.cgi?name=KH.C14.65;source=kh2013
KH.C7.92	KH2013:KH.C7.92	KH.C7.92	Cirobu.g00008693	3.02649	1.63292	0.152029	-0.368071	0.748988	0	https://www.aniseed.cnrs.fr/aniseed/gene/show_expression?unique_id=Cirobu.g00008693	https://www.aniseed.cnrs.fr/aniseed/gene/show_gene?unique_id=Cirobu.g00008693	http://ghost.zool.kyoto-u.ac.jp/cgi-bin/fordetailkh21.cgi?name=KH.C7.92;source=kh2013
KH.C12.549	KH2013:KH.C12.549_ACAN	ACAN; CLEC17A; NCAN	Cirobu.g00003114	2.87237	1.63233	0.0615845	-0.0942204	0.930663	1	https://www.aniseed.cnrs.fr/aniseed/gene/show_expression?unique_id=Cirobu.g00003114	https://www.aniseed.cnrs.fr/aniseed/gene/show_gene?unique_id=Cirobu.g00003114	http://ghost.zool.kyoto-u.ac.jp/cgi-bin/fordetailkh21.cgi?name=KH.C12.549;source=kh2013
KH.C8.50	CADPS/2	CADPS; CADPS2; UNC13A	Cirobu.g00009140	7.22931	1.632	0.0133909	-0.526977	0.414656	0	https://www.aniseed.cnrs.fr/aniseed/gene/show_expression?unique_id=Cirobu.g00009140	https://www.aniseed.cnrs.fr/aniseed/gene/show_gene?unique_id=Cirobu.g00009140	http://ghost.zool.kyoto-u.ac.jp/cgi-bin/fordetailkh21.cgi?name=KH.C8.50;source=kh2013
KH.L116.53	B4GALT5/6	B4GALT2; B4GALT5; B4GALT6	Cirobu.g00010784	6.0409	1.62173	0.000959573	-0.380259	0.430314	0	https://www.aniseed.cnrs.fr/aniseed/gene/show_expression?unique_id=Cirobu.g00010784	https://www.aniseed.cnrs.fr/aniseed/gene/show_gene?unique_id=Cirobu.g00010784	http://ghost.zool.kyoto-u.ac.jp/cgi-bin/fordetailkh21.cgi?name=KH.L116.53;source=kh2013
KH.C14.481	KH2013:KH.C14.481	CR1; CSMD3; SELP	Cirobu.g00003920	0.257334	1.61851	0.243278	0.086736	1	0	https://www.aniseed.cnrs.fr/aniseed/gene/show_expression?unique_id=Cirobu.g00003920	https://www.aniseed.cnrs.fr/aniseed/gene/show_gene?unique_id=Cirobu.g00003920	http://ghost.zool.kyoto-u.ac.jp/cgi-bin/fordetailkh21.cgi?name=KH.C14.481;source=kh2013
KH.C2.315	LACC1	LACC1	Cirobu.g00004502	0.690191	1.61279	0.0690403	-0.700323	0.48481	0	https://www.aniseed.cnrs.fr/aniseed/gene/show_expression?unique_id=Cirobu.g00004502	https://www.aniseed.cnrs.fr/aniseed/gene/show_gene?unique_id=Cirobu.g00004502	http://ghost.zool.kyoto-u.ac.jp/cgi-bin/fordetailkh21.cgi?name=KH.C2.315;source=kh2013
KH.C9.253	MAP3K1	MAP3K1; MAP3K2; MAP3K3	Cirobu.g00009782	6.59097	1.61152	0.00101307	-0.520652	0.279983	0	https://www.aniseed.cnrs.fr/aniseed/gene/show_expression?unique_id=Cirobu.g00009782	https://www.aniseed.cnrs.fr/aniseed/gene/show_gene?unique_id=Cirobu.g00009782	http://ghost.zool.kyoto-u.ac.jp/cgi-bin/fordetailkh21.cgi?name=KH.C9.253;source=kh2013
KH.C7.109	SLC30A2/8	SLC30A2; SLC30A3; SLC30A8	Cirobu.g00007927	7.43715	1.61031	0.0140752	-0.7368	0.252739	4	https://www.aniseed.cnrs.fr/aniseed/gene/show_expression?unique_id=Cirobu.g00007927	https://www.aniseed.cnrs.fr/aniseed/gene/show_gene?unique_id=Cirobu.g00007927	http://ghost.zool.kyoto-u.ac.jp/cgi-bin/fordetailkh21.cgi?name=KH.C7.109;source=kh2013
KH.S1313.1	KH2013:KH.S1313.1	KH.S1313.1	Cirobu.g00013787	5.30821	1.60472	0.102591	-1.18298	0.224981	0	https://www.aniseed.cnrs.fr/aniseed/gene/show_expression?unique_id=Cirobu.g00013787	https://www.aniseed.cnrs.fr/aniseed/gene/show_gene?unique_id=Cirobu.g00013787	http://ghost.zool.kyoto-u.ac.jp/cgi-bin/fordetailkh21.cgi?name=KH.S1313.1;source=kh2013
KH.C10.27	KH2013:KH.C10.27	KH.C10.27	Cirobu.g00001478	4.22068	1.60081	0.000242688	-1.4769	0.00129129	6	https://www.aniseed.cnrs.fr/aniseed/gene/show_expression?unique_id=Cirobu.g00001478	https://www.aniseed.cnrs.fr/aniseed/gene/show_gene?unique_id=Cirobu.g00001478	http://ghost.zool.kyoto-u.ac.jp/cgi-bin/fordetailkh21.cgi?name=KH.C10.27;source=kh2013
KH.C4.602	KH2013:KH.C4.602_RXFP1	LRP1B; SORL1; VLDLR	Cirobu.g00006707	5.65056	1.60079	0.0728716	-0.0160429	0.988331	0	https://www.aniseed.cnrs.fr/aniseed/gene/show_expression?unique_id=Cirobu.g00006707	https://www.aniseed.cnrs.fr/aniseed/gene/show_gene?unique_id=Cirobu.g00006707	http://ghost.zool.kyoto-u.ac.jp/cgi-bin/fordetailkh21.cgi?name=KH.C4.602;source=kh2013
KH.C11.439	RLBP1	CLVS1; RLBP1; TTPAL	Cirobu.g00002272	7.2251	1.59976	0.00331376	0.243581	0.647561	16	https://www.aniseed.cnrs.fr/aniseed/gene/show_expression?unique_id=Cirobu.g00002272	https://www.aniseed.cnrs.fr/aniseed/gene/show_gene?unique_id=Cirobu.g00002272	http://ghost.zool.kyoto-u.ac.jp/cgi-bin/fordetailkh21.cgi?name=KH.C11.439;source=kh2013
KH.C1.127	LRRN1/2/3	LRRN1; LRRN2; LRRN3	Cirobu.g00000299	6.66284	1.59814	0.0240424	-1.36459	0.0529117	2	https://www.aniseed.cnrs.fr/aniseed/gene/show_expression?unique_id=Cirobu.g00000299	https://www.aniseed.cnrs.fr/aniseed/gene/show_gene?unique_id=Cirobu.g00000299	http://ghost.zool.kyoto-u.ac.jp/cgi-bin/fordetailkh21.cgi?name=KH.C1.127;source=kh2013
KH.S1497.1	KH2013:KH.S1497.1_RTL1	NYNRIN; RTL1	Cirobu.g00013916	3.54892	1.59575	0.00810188	-1.66866	0.00813905	0	https://www.aniseed.cnrs.fr/aniseed/gene/show_expression?unique_id=Cirobu.g00013916	https://www.aniseed.cnrs.fr/aniseed/gene/show_gene?unique_id=Cirobu.g00013916	http://ghost.zool.kyoto-u.ac.jp/cgi-bin/fordetailkh21.cgi?name=KH.S1497.1;source=kh2013
KH.C9.462	SCN8A	SCN1A; SCN2A; SCN3A	Cirobu.g00010010	7.85849	1.59113	0.0633486	-0.242635	0.772061	0	https://www.aniseed.cnrs.fr/aniseed/gene/show_expression?unique_id=Cirobu.g00010010	https://www.aniseed.cnrs.fr/aniseed/gene/show_gene?unique_id=Cirobu.g00010010	http://ghost.zool.kyoto-u.ac.jp/cgi-bin/fordetailkh21.cgi?name=KH.C9.462;source=kh2013
KH.S731.1	KH2013:KH.S731.1_ATL1/3	ATL1; ATL2; ATL3	Cirobu.g00014979	1.92576	1.59017	0.0253387	-0.971264	0.207973	0	https://www.aniseed.cnrs.fr/aniseed/gene/show_expression?unique_id=Cirobu.g00014979	https://www.aniseed.cnrs.fr/aniseed/gene/show_gene?unique_id=Cirobu.g00014979	http://ghost.zool.kyoto-u.ac.jp/cgi-bin/fordetailkh21.cgi?name=KH.S731.1;source=kh2013
KH.C1.984	Y70G10A.3	AC011604.2; SLCO1B3; SLCO1B7	Cirobu.g00001277	1.0495	1.58995	0.0324547	0.213091	0.846288	0	https://www.aniseed.cnrs.fr/aniseed/gene/show_expression?unique_id=Cirobu.g00001277	https://www.aniseed.cnrs.fr/aniseed/gene/show_gene?unique_id=Cirobu.g00001277	http://ghost.zool.kyoto-u.ac.jp/cgi-bin/fordetailkh21.cgi?name=KH.C1.984;source=kh2013
KH.C2.234	KH2013:KH.C2.234	KH.C2.234	Cirobu.g00004413	5.03817	1.58892	0.00142969	-0.783203	0.114385	0	https://www.aniseed.cnrs.fr/aniseed/gene/show_expression?unique_id=Cirobu.g00004413	https://www.aniseed.cnrs.fr/aniseed/gene/show_gene?unique_id=Cirobu.g00004413	http://ghost.zool.kyoto-u.ac.jp/cgi-bin/fordetailkh21.cgi?name=KH.C2.234;source=kh2013
KH.C3.591	KH2013:KH.C3.591	KH.C3.591	Cirobu.g00005783	6.09947	1.58736	0.00439496	0.339018	0.536543	8	https://www.aniseed.cnrs.fr/aniseed/gene/show_expression?unique_id=Cirobu.g00005783	https://www.aniseed.cnrs.fr/aniseed/gene/show_gene?unique_id=Cirobu.g00005783	http://ghost.zool.kyoto-u.ac.jp/cgi-bin/fordetailkh21.cgi?name=KH.C3.591;source=kh2013
KH.C14.467	KH2013:KH.C14.467_LPGAT1	AGPAT5; LCLAT1; LPGAT1	Cirobu.g00003904	3.10066	1.58583	0.164278	-1.75737	0.122384	0	https://www.aniseed.cnrs.fr/aniseed/gene/show_expression?unique_id=Cirobu.g00003904	https://www.aniseed.cnrs.fr/aniseed/gene/show_gene?unique_id=Cirobu.g00003904	http://ghost.zool.kyoto-u.ac.jp/cgi-bin/fordetailkh21.cgi?name=KH.C14.467;source=kh2013
KH.S588.3	CLEC7A	KH.S588.3	Cirobu.g00014736	0.168008	1.58543	0.053165	1.34395	0.117318	0	https://www.aniseed.cnrs.fr/aniseed/gene/show_expression?unique_id=Cirobu.g00014736	https://www.aniseed.cnrs.fr/aniseed/gene/show_gene?unique_id=Cirobu.g00014736	http://ghost.zool.kyoto-u.ac.jp/cgi-bin/fordetailkh21.cgi?name=KH.S588.3;source=kh2013
KH.C1.90	SLC25A33/36	SLC25A21; SLC25A33; SLC25A36	Cirobu.g00001185	4.71164	1.58167	0.000350561	-0.494493	0.263947	4	https://www.aniseed.cnrs.fr/aniseed/gene/show_expression?unique_id=Cirobu.g00001185	https://www.aniseed.cnrs.fr/aniseed/gene/show_gene?unique_id=Cirobu.g00001185	http://ghost.zool.kyoto-u.ac.jp/cgi-bin/fordetailkh21.cgi?name=KH.C1.90;source=kh2013
KH.C3.897	Y46G5A.29	DLL1; FAT1	Cirobu.g00006110	0.436694	1.57736	0.124043	1.8433	0.0755618	2	https://www.aniseed.cnrs.fr/aniseed/gene/show_expression?unique_id=Cirobu.g00006110	https://www.aniseed.cnrs.fr/aniseed/gene/show_gene?unique_id=Cirobu.g00006110	http://ghost.zool.kyoto-u.ac.jp/cgi-bin/fordetailkh21.cgi?name=KH.C3.897;source=kh2013
KH.L99.1	C330046G03RIK	LGI2; LGI3; TSPEAR	Cirobu.g00013469	1.71424	1.57656	0.046507	0.366867	0.661066	0	https://www.aniseed.cnrs.fr/aniseed/gene/show_expression?unique_id=Cirobu.g00013469	https://www.aniseed.cnrs.fr/aniseed/gene/show_gene?unique_id=Cirobu.g00013469	http://ghost.zool.kyoto-u.ac.jp/cgi-bin/fordetailkh21.cgi?name=KH.L99.1;source=kh2013
KH.C2.879	NAPRT1	NAPRT	Cirobu.g00005118	3.57982	1.57441	0.0005829	0.527065	0.251675	0	https://www.aniseed.cnrs.fr/aniseed/gene/show_expression?unique_id=Cirobu.g00005118	https://www.aniseed.cnrs.fr/aniseed/gene/show_gene?unique_id=Cirobu.g00005118	http://ghost.zool.kyoto-u.ac.jp/cgi-bin/fordetailkh21.cgi?name=KH.C2.879;source=kh2013
KH.C3.839	KH2013:KH.C3.839	KH.C3.839	Cirobu.g00006048	2.18455	1.57415	0.0356715	-0.698022	0.388342	0	https://www.aniseed.cnrs.fr/aniseed/gene/show_expression?unique_id=Cirobu.g00006048	https://www.aniseed.cnrs.fr/aniseed/gene/show_gene?unique_id=Cirobu.g00006048	http://ghost.zool.kyoto-u.ac.jp/cgi-bin/fordetailkh21.cgi?name=KH.C3.839;source=kh2013
KH.L119.10	CLSTN1/2/3	CLSTN1; CLSTN2; CLSTN3	Cirobu.g00010846	6.68845	1.56724	0.00880496	-0.565677	0.335847	12	https://www.aniseed.cnrs.fr/aniseed/gene/show_expression?unique_id=Cirobu.g00010846	https://www.aniseed.cnrs.fr/aniseed/gene/show_gene?unique_id=Cirobu.g00010846	http://ghost.zool.kyoto-u.ac.jp/cgi-bin/fordetailkh21.cgi?name=KH.L119.10;source=kh2013
KH.C2.509	RAB26/37	RAB26; RAB37; RAB8B	Cirobu.g00004714	5.66745	1.56481	0.00132921	-0.693694	0.151018	0	https://www.aniseed.cnrs.fr/aniseed/gene/show_expression?unique_id=Cirobu.g00004714	https://www.aniseed.cnrs.fr/aniseed/gene/show_gene?unique_id=Cirobu.g00004714	http://ghost.zool.kyoto-u.ac.jp/cgi-bin/fordetailkh21.cgi?name=KH.C2.509;source=kh2013
KH.C11.383	BRSK1/2	BRSK1; BRSK2; SIK3	Cirobu.g00002212	6.59799	1.55931	2.32e-05	-1.05847	0.00392818	14	https://www.aniseed.cnrs.fr/aniseed/gene/show_expression?unique_id=Cirobu.g00002212	https://www.aniseed.cnrs.fr/aniseed/gene/show_gene?unique_id=Cirobu.g00002212	http://ghost.zool.kyoto-u.ac.jp/cgi-bin/fordetailkh21.cgi?name=KH.C11.383;source=kh2013
KH.S1039.5	KH2013:KH.S1039.5	KH.S1039.5	Cirobu.g00013532	1.78976	1.55671	0.166853	-1.63027	0.161394	0	https://www.aniseed.cnrs.fr/aniseed/gene/show_expression?unique_id=Cirobu.g00013532	https://www.aniseed.cnrs.fr/aniseed/gene/show_gene?unique_id=Cirobu.g00013532	http://ghost.zool.kyoto-u.ac.jp/cgi-bin/fordetailkh21.cgi?name=KH.S1039.5;source=kh2013
KH.L147.29	KH2013:KH.L147.29_GJC2	GJA8; GJC1; GJD2	Cirobu.g00011308	4.47246	1.55666	0.0399431	-0.0820127	0.91344	0	https://www.aniseed.cnrs.fr/aniseed/gene/show_expression?unique_id=Cirobu.g00011308	https://www.aniseed.cnrs.fr/aniseed/gene/show_gene?unique_id=Cirobu.g00011308	http://ghost.zool.kyoto-u.ac.jp/cgi-bin/fordetailkh21.cgi?name=KH.L147.29;source=kh2013
KH.C3.324	SLC17A8	SLC17A6; SLC17A7; SLC17A8	Cirobu.g00005496	3.07186	1.55634	0.149067	-0.973141	0.363405	2	https://www.aniseed.cnrs.fr/aniseed/gene/show_expression?unique_id=Cirobu.g00005496	https://www.aniseed.cnrs.fr/aniseed/gene/show_gene?unique_id=Cirobu.g00005496	http://ghost.zool.kyoto-u.ac.jp/cgi-bin/fordetailkh21.cgi?name=KH.C3.324;source=kh2013
KH.C14.600	KH2013:KH.C14.600	KH.C14.600	Cirobu.g00004049	1.84815	1.55586	0.0733009	-0.0177486	1	0	https://www.aniseed.cnrs.fr/aniseed/gene/show_expression?unique_id=Cirobu.g00004049	https://www.aniseed.cnrs.fr/aniseed/gene/show_gene?unique_id=Cirobu.g00004049	http://ghost.zool.kyoto-u.ac.jp/cgi-bin/fordetailkh21.cgi?name=KH.C14.600;source=kh2013
KH.L108.43	ACR-11/15/16/25/9	AC243734.1; AC254952.1; CHRNA7	Cirobu.g00010639	3.85602	1.55462	0.16864	0.338898	0.76163	0	https://www.aniseed.cnrs.fr/aniseed/gene/show_expression?unique_id=Cirobu.g00010639	https://www.aniseed.cnrs.fr/aniseed/gene/show_gene?unique_id=Cirobu.g00010639	http://ghost.zool.kyoto-u.ac.jp/cgi-bin/fordetailkh21.cgi?name=KH.L108.43;source=kh2013
KH.C1.94	MIB1	ANK3; MIB1; MIB2	Cirobu.g00001228	6.40546	1.55367	0.00316652	-0.432598	0.401675	13	https://www.aniseed.cnrs.fr/aniseed/gene/show_expression?unique_id=Cirobu.g00001228	https://www.aniseed.cnrs.fr/aniseed/gene/show_gene?unique_id=Cirobu.g00001228	http://ghost.zool.kyoto-u.ac.jp/cgi-bin/fordetailkh21.cgi?name=KH.C1.94;source=kh2013
KH.C7.140	KH2013:KH.C7.140	KH.C7.140	Cirobu.g00007961	9.04724	1.55105	8.56e-05	-0.907569	0.0198034	30	https://www.aniseed.cnrs.fr/aniseed/gene/show_expression?unique_id=Cirobu.g00007961	https://www.aniseed.cnrs.fr/aniseed/gene/show_gene?unique_id=Cirobu.g00007961	http://ghost.zool.kyoto-u.ac.jp/cgi-bin/fordetailkh21.cgi?name=KH.C7.140;source=kh2013
KH.C14.452	KH2013:KH.C14.452	KH.C14.452	Cirobu.g00003888	1.06698	1.54855	0.234871	-0.328817	0.799658	0	https://www.aniseed.cnrs.fr/aniseed/gene/show_expression?unique_id=Cirobu.g00003888	https://www.aniseed.cnrs.fr/aniseed/gene/show_gene?unique_id=Cirobu.g00003888	http://ghost.zool.kyoto-u.ac.jp/cgi-bin/fordetailkh21.cgi?name=KH.C14.452;source=kh2013
KH.C4.66	KH2013:KH.C4.66_SCL-1/10/11/12/13/14/15/17/18/19/2/20/3/5/6/7/8/9	GLIPR1; GLIPR1L1; PI16	Cirobu.g00006770	1.29581	1.54702	0.108701	-0.617078	0.535095	0	https://www.aniseed.cnrs.fr/aniseed/gene/show_expression?unique_id=Cirobu.g00006770	https://www.aniseed.cnrs.fr/aniseed/gene/show_gene?unique_id=Cirobu.g00006770	http://ghost.zool.kyoto-u.ac.jp/cgi-bin/fordetailkh21.cgi?name=KH.C4.66;source=kh2013
KH.C8.400	RAB3C	RAB3A; RAB3B; RAB3C	Cirobu.g00009031	8.86952	1.54637	0.000861184	-0.429879	0.344519	0	https://www.aniseed.cnrs.fr/aniseed/gene/show_expression?unique_id=Cirobu.g00009031	https://www.aniseed.cnrs.fr/aniseed/gene/show_gene?unique_id=Cirobu.g00009031	http://ghost.zool.kyoto-u.ac.jp/cgi-bin/fordetailkh21.cgi?name=KH.C8.400;source=kh2013
KH.L59.8	CHRNA3/6	CHRNA2; CHRNA3; CHRNA6	Cirobu.g00012843	2.91791	1.54527	0.162257	-0.969423	0.376931	0	https://www.aniseed.cnrs.fr/aniseed/gene/show_expression?unique_id=Cirobu.g00012843	https://www.aniseed.cnrs.fr/aniseed/gene/show_gene?unique_id=Cirobu.g00012843	http://ghost.zool.kyoto-u.ac.jp/cgi-bin/fordetailkh21.cgi?name=KH.L59.8;source=kh2013
KH.L47.3	LYPD1/2	LYPD1; LYPD2	Cirobu.g00012696	2.16887	1.53234	0.13871	-0.349204	0.740043	0	https://www.aniseed.cnrs.fr/aniseed/gene/show_expression?unique_id=Cirobu.g00012696	https://www.aniseed.cnrs.fr/aniseed/gene/show_gene?unique_id=Cirobu.g00012696	http://ghost.zool.kyoto-u.ac.jp/cgi-bin/fordetailkh21.cgi?name=KH.L47.3;source=kh2013
KH.C1.298	KH2013:KH.C1.298_BHMT/2	BHMT; BHMT2; MTR	Cirobu.g00000523	1.73505	1.53073	0.0307977	0.731116	0.310276	0	https://www.aniseed.cnrs.fr/aniseed/gene/show_expression?unique_id=Cirobu.g00000523	https://www.aniseed.cnrs.fr/aniseed/gene/show_gene?unique_id=Cirobu.g00000523	http://ghost.zool.kyoto-u.ac.jp/cgi-bin/fordetailkh21.cgi?name=KH.C1.298;source=kh2013
KH.C9.771	HDAC3	HDAC1; HDAC2; HDAC3	Cirobu.g00010351	5.70862	1.52953	0.00015327	-0.652147	0.10305	1	https://www.aniseed.cnrs.fr/aniseed/gene/show_expression?unique_id=Cirobu.g00010351	https://www.aniseed.cnrs.fr/aniseed/gene/show_gene?unique_id=Cirobu.g00010351	http://ghost.zool.kyoto-u.ac.jp/cgi-bin/fordetailkh21.cgi?name=KH.C9.771;source=kh2013
KH.C9.763	NMA1/2	NMNAT1; NMNAT2; NMNAT3	Cirobu.g00010342	6.72148	1.52707	0.000353424	-0.737483	0.0807187	0	https://www.aniseed.cnrs.fr/aniseed/gene/show_expression?unique_id=Cirobu.g00010342	https://www.aniseed.cnrs.fr/aniseed/gene/show_gene?unique_id=Cirobu.g00010342	http://ghost.zool.kyoto-u.ac.jp/cgi-bin/fordetailkh21.cgi?name=KH.C9.763;source=kh2013
KH.C12.424	KH2013:KH.C12.424_A1CF	A1CF; RBM46; RBM47	Cirobu.g00002978	1.30546	1.52325	0.470075	2.00589	0.347057	2	https://www.aniseed.cnrs.fr/aniseed/gene/show_expression?unique_id=Cirobu.g00002978	https://www.aniseed.cnrs.fr/aniseed/gene/show_gene?unique_id=Cirobu.g00002978	http://ghost.zool.kyoto-u.ac.jp/cgi-bin/fordetailkh21.cgi?name=KH.C12.424;source=kh2013
KH.C2.448	KH2013:KH.C2.448_NAS-16/17/23/25/27/28/29/31/32	PRSS8; ST14; TMPRSS11D	Cirobu.g00004646	5.37693	1.52074	0.14454	0.283168	0.784467	1	https://www.aniseed.cnrs.fr/aniseed/gene/show_expression?unique_id=Cirobu.g00004646	https://www.aniseed.cnrs.fr/aniseed/gene/show_gene?unique_id=Cirobu.g00004646	http://ghost.zool.kyoto-u.ac.jp/cgi-bin/fordetailkh21.cgi?name=KH.C2.448;source=kh2013
KH.C11.251	TNFRSF1B	CD40; NGFR; TNFRSF19	Cirobu.g00002069	0.645453	1.5176	0.211151	0.212851	0.934544	0	https://www.aniseed.cnrs.fr/aniseed/gene/show_expression?unique_id=Cirobu.g00002069	https://www.aniseed.cnrs.fr/aniseed/gene/show_gene?unique_id=Cirobu.g00002069	http://ghost.zool.kyoto-u.ac.jp/cgi-bin/fordetailkh21.cgi?name=KH.C11.251;source=kh2013
KH.C8.287	KH2013:KH.C8.287	KH.C8.287	Cirobu.g00008908	1.38272	1.51032	0.202264	0.0426498	1	4	https://www.aniseed.cnrs.fr/aniseed/gene/show_expression?unique_id=Cirobu.g00008908	https://www.aniseed.cnrs.fr/aniseed/gene/show_gene?unique_id=Cirobu.g00008908	http://ghost.zool.kyoto-u.ac.jp/cgi-bin/fordetailkh21.cgi?name=KH.C8.287;source=kh2013
KH.C2.457	KH2013:KH.C2.457	KH.C2.457	Cirobu.g00004656	6.18204	1.50899	0.0172533	-0.452718	0.471019	0	https://www.aniseed.cnrs.fr/aniseed/gene/show_expression?unique_id=Cirobu.g00004656	https://www.aniseed.cnrs.fr/aniseed/gene/show_gene?unique_id=Cirobu.g00004656	http://ghost.zool.kyoto-u.ac.jp/cgi-bin/fordetailkh21.cgi?name=KH.C2.457;source=kh2013
KH.C8.500	KH2013:KH.C8.500	KH.C8.500	Cirobu.g00009141	2.88875	1.50871	0.0277766	-2.26805	0.00203259	0	https://www.aniseed.cnrs.fr/aniseed/gene/show_expression?unique_id=Cirobu.g00009141	https://www.aniseed.cnrs.fr/aniseed/gene/show_gene?unique_id=Cirobu.g00009141	http://ghost.zool.kyoto-u.ac.jp/cgi-bin/fordetailkh21.cgi?name=KH.C8.500;source=kh2013
KH.C11.155	ADRA2A	ADRA2A; CHRM3; MC5R	Cirobu.g00001965	1.22925	1.50706	0.151572	-0.809024	0.438505	0	https://www.aniseed.cnrs.fr/aniseed/gene/show_expression?unique_id=Cirobu.g00001965	https://www.aniseed.cnrs.fr/aniseed/gene/show_gene?unique_id=Cirobu.g00001965	http://ghost.zool.kyoto-u.ac.jp/cgi-bin/fordetailkh21.cgi?name=KH.C11.155;source=kh2013
KH.C13.115	STXBP1/2	STXBP1; STXBP2; STXBP3	Cirobu.g00003328	6.93201	1.50684	0.00335208	-0.471968	0.349988	1	https://www.aniseed.cnrs.fr/aniseed/gene/show_expression?unique_id=Cirobu.g00003328	https://www.aniseed.cnrs.fr/aniseed/gene/show_gene?unique_id=Cirobu.g00003328	http://ghost.zool.kyoto-u.ac.jp/cgi-bin/fordetailkh21.cgi?name=KH.C13.115;source=kh2013
KH.L108.27	KH2013:KH.L108.27_MUC5B	KH.L108.27	Cirobu.g00010621	0.622144	1.50433	0.0903572	-0.569599	0.53085	0	https://www.aniseed.cnrs.fr/aniseed/gene/show_expression?unique_id=Cirobu.g00010621	https://www.aniseed.cnrs.fr/aniseed/gene/show_gene?unique_id=Cirobu.g00010621	http://ghost.zool.kyoto-u.ac.jp/cgi-bin/fordetailkh21.cgi?name=KH.L108.27;source=kh2013
KH.L28.9	Q5ZMK1_CHICK	CARNMT1	Cirobu.g00012274	4.02803	1.50188	0.00238064	-0.343319	0.494079	0	https://www.aniseed.cnrs.fr/aniseed/gene/show_expression?unique_id=Cirobu.g00012274	https://www.aniseed.cnrs.fr/aniseed/gene/show_gene?unique_id=Cirobu.g00012274	http://ghost.zool.kyoto-u.ac.jp/cgi-bin/fordetailkh21.cgi?name=KH.L28.9;source=kh2013
KH.C5.522	KH2013:KH.C5.522_SLC6A13	SLC6A11; SLC6A12; SLC6A13	Cirobu.g00007416	5.27339	1.50093	0.00945222	-1.09912	0.0565321	0	https://www.aniseed.cnrs.fr/aniseed/gene/show_expression?unique_id=Cirobu.g00007416	https://www.aniseed.cnrs.fr/aniseed/gene/show_gene?unique_id=Cirobu.g00007416	http://ghost.zool.kyoto-u.ac.jp/cgi-bin/fordetailkh21.cgi?name=KH.C5.522;source=kh2013
KH.C5.443	KH2013:KH.C5.443	KH.C5.443	Cirobu.g00007328	1.41734	1.49797	0.102543	-0.930347	0.31567	4	https://www.aniseed.cnrs.fr/aniseed/gene/show_expression?unique_id=Cirobu.g00007328	https://www.aniseed.cnrs.fr/aniseed/gene/show_gene?unique_id=Cirobu.g00007328	http://ghost.zool.kyoto-u.ac.jp/cgi-bin/fordetailkh21.cgi?name=KH.C5.443;source=kh2013
KH.C10.295	KH2013:KH.C10.295	KH.C10.295	Cirobu.g00001505	2.78289	1.49678	0.0198839	-0.692962	0.279864	0	https://www.aniseed.cnrs.fr/aniseed/gene/show_expression?unique_id=Cirobu.g00001505	https://www.aniseed.cnrs.fr/aniseed/gene/show_gene?unique_id=Cirobu.g00001505	http://ghost.zool.kyoto-u.ac.jp/cgi-bin/fordetailkh21.cgi?name=KH.C10.295;source=kh2013
KH.C3.198	KH2013:KH.C3.198	KH.C3.198	Cirobu.g00005358	0.8692	1.49622	0.0718322	-0.16822	0.919326	0	https://www.aniseed.cnrs.fr/aniseed/gene/show_expression?unique_id=Cirobu.g00005358	https://www.aniseed.cnrs.fr/aniseed/gene/show_gene?unique_id=Cirobu.g00005358	http://ghost.zool.kyoto-u.ac.jp/cgi-bin/fordetailkh21.cgi?name=KH.C3.198;source=kh2013
KH.C7.615	KH2013:KH.C7.615	KH.C7.615	Cirobu.g00008479	3.86899	1.49455	0.0130537	-1.64078	0.00739517	0	https://www.aniseed.cnrs.fr/aniseed/gene/show_expression?unique_id=Cirobu.g00008479	https://www.aniseed.cnrs.fr/aniseed/gene/show_gene?unique_id=Cirobu.g00008479	http://ghost.zool.kyoto-u.ac.jp/cgi-bin/fordetailkh21.cgi?name=KH.C7.615;source=kh2013
KH.C11.45	KH2013:KH.C11.45	KH.C11.45	Cirobu.g00002283	0.389048	1.49321	0.0935371	0.505004	0.625839	0	https://www.aniseed.cnrs.fr/aniseed/gene/show_expression?unique_id=Cirobu.g00002283	https://www.aniseed.cnrs.fr/aniseed/gene/show_gene?unique_id=Cirobu.g00002283	http://ghost.zool.kyoto-u.ac.jp/cgi-bin/fordetailkh21.cgi?name=KH.C11.45;source=kh2013
KH.L116.85	KH2013:KH.L116.85_TUBB4B	TUBB; TUBB2B; TUBB4B	Cirobu.g00010819	11.7012	1.49196	0.00143564	-0.782822	0.0895708	21	https://www.aniseed.cnrs.fr/aniseed/gene/show_expression?unique_id=Cirobu.g00010819	https://www.aniseed.cnrs.fr/aniseed/gene/show_gene?unique_id=Cirobu.g00010819	http://ghost.zool.kyoto-u.ac.jp/cgi-bin/fordetailkh21.cgi?name=KH.L116.85;source=kh2013
KH.C9.381	NT5DC2/3	NT5C2; NT5DC2; NT5DC3	Cirobu.g00009921	6.02491	1.49113	0.000421493	-0.227856	0.586993	0	https://www.aniseed.cnrs.fr/aniseed/gene/show_expression?unique_id=Cirobu.g00009921	https://www.aniseed.cnrs.fr/aniseed/gene/show_gene?unique_id=Cirobu.g00009921	http://ghost.zool.kyoto-u.ac.jp/cgi-bin/fordetailkh21.cgi?name=KH.C9.381;source=kh2013
KH.C4.720	C9ORF64	C9orf64	Cirobu.g00006838	2.8864	1.48841	0.0119825	-0.087653	0.879527	0	https://www.aniseed.cnrs.fr/aniseed/gene/show_expression?unique_id=Cirobu.g00006838	https://www.aniseed.cnrs.fr/aniseed/gene/show_gene?unique_id=Cirobu.g00006838	http://ghost.zool.kyoto-u.ac.jp/cgi-bin/fordetailkh21.cgi?name=KH.C4.720;source=kh2013
KH.C3.562	MYO10	MYO10; PLEKHH2; PLEKHH3	Cirobu.g00005751	4.37354	1.48813	0.0640894	-0.227617	0.777024	0	https://www.aniseed.cnrs.fr/aniseed/gene/show_expression?unique_id=Cirobu.g00005751	https://www.aniseed.cnrs.fr/aniseed/gene/show_gene?unique_id=Cirobu.g00005751	http://ghost.zool.kyoto-u.ac.jp/cgi-bin/fordetailkh21.cgi?name=KH.C3.562;source=kh2013
KH.C5.507	KH2013:KH.C5.507	KH.C5.507	Cirobu.g00007399	2.26416	1.48784	0.129493	-0.599402	0.532493	0	https://www.aniseed.cnrs.fr/aniseed/gene/show_expression?unique_id=Cirobu.g00007399	https://www.aniseed.cnrs.fr/aniseed/gene/show_gene?unique_id=Cirobu.g00007399	http://ghost.zool.kyoto-u.ac.jp/cgi-bin/fordetailkh21.cgi?name=KH.C5.507;source=kh2013
KH.L96.71	KH2013:KH.L96.71	KH.L96.71	Cirobu.g00013418	1.58102	1.48685	0.0601226	0.10224	0.901487	0	https://www.aniseed.cnrs.fr/aniseed/gene/show_expression?unique_id=Cirobu.g00013418	https://www.aniseed.cnrs.fr/aniseed/gene/show_gene?unique_id=Cirobu.g00013418	http://ghost.zool.kyoto-u.ac.jp/cgi-bin/fordetailkh21.cgi?name=KH.L96.71;source=kh2013
KH.C4.697	KH2013:KH.C4.697_ALD4/5/6	ALDH1A2; ALDH1A3; ALDH2	Cirobu.g00006811	6.68517	1.48641	0.205831	2.73629	0.0254317	10	https://www.aniseed.cnrs.fr/aniseed/gene/show_expression?unique_id=Cirobu.g00006811	https://www.aniseed.cnrs.fr/aniseed/gene/show_gene?unique_id=Cirobu.g00006811	http://ghost.zool.kyoto-u.ac.jp/cgi-bin/fordetailkh21.cgi?name=KH.C4.697;source=kh2013
KH.S688.3	KH2013:KH.S688.3_CR762486.1	KH.S688.3	Cirobu.g00014930	0.919274	1.47817	0.0693999	0.0792413	0.92327	0	https://www.aniseed.cnrs.fr/aniseed/gene/show_expression?unique_id=Cirobu.g00014930	https://www.aniseed.cnrs.fr/aniseed/gene/show_gene?unique_id=Cirobu.g00014930	http://ghost.zool.kyoto-u.ac.jp/cgi-bin/fordetailkh21.cgi?name=KH.S688.3;source=kh2013
KH.C8.679	CNTN1/2/3/4/5/6	CNTN2; CNTN3; CNTN4	Cirobu.g00009335	3.84252	1.4735	0.13255	-0.410587	0.673127	0	https://www.aniseed.cnrs.fr/aniseed/gene/show_expression?unique_id=Cirobu.g00009335	https://www.aniseed.cnrs.fr/aniseed/gene/show_gene?unique_id=Cirobu.g00009335	http://ghost.zool.kyoto-u.ac.jp/cgi-bin/fordetailkh21.cgi?name=KH.C8.679;source=kh2013
KH.C9.192	RUNDC1	RUNDC1	Cirobu.g00009715	6.2853	1.47179	0.000219343	-0.769037	0.0512876	0	https://www.aniseed.cnrs.fr/aniseed/gene/show_expression?unique_id=Cirobu.g00009715	https://www.aniseed.cnrs.fr/aniseed/gene/show_gene?unique_id=Cirobu.g00009715	http://ghost.zool.kyoto-u.ac.jp/cgi-bin/fordetailkh21.cgi?name=KH.C9.192;source=kh2013
KH.C1.771	KH2013:KH.C1.771_LPHN1/2/3	ADGRE5; ADGRG7; ADGRL3	Cirobu.g00001043	0.319703	1.46415	0.215151	0.539243	0.690373	0	https://www.aniseed.cnrs.fr/aniseed/gene/show_expression?unique_id=Cirobu.g00001043	https://www.aniseed.cnrs.fr/aniseed/gene/show_gene?unique_id=Cirobu.g00001043	http://ghost.zool.kyoto-u.ac.jp/cgi-bin/fordetailkh21.cgi?name=KH.C1.771;source=kh2013
KH.L38.11	KH2013:KH.L38.11_FRMPD4	FRMPD1; FRMPD3; FRMPD4	Cirobu.g00012452	5.68272	1.45905	0.00709666	-0.284174	0.591604	4	https://www.aniseed.cnrs.fr/aniseed/gene/show_expression?unique_id=Cirobu.g00012452	https://www.aniseed.cnrs.fr/aniseed/gene/show_gene?unique_id=Cirobu.g00012452	http://ghost.zool.kyoto-u.ac.jp/cgi-bin/fordetailkh21.cgi?name=KH.L38.11;source=kh2013
KH.C9.15	UTP18	CDC40; POC1A; UTP18	Cirobu.g00009668	6.46219	1.45763	1.58e-05	-0.547986	0.101997	0	https://www.aniseed.cnrs.fr/aniseed/gene/show_expression?unique_id=Cirobu.g00009668	https://www.aniseed.cnrs.fr/aniseed/gene/show_gene?unique_id=Cirobu.g00009668	http://ghost.zool.kyoto-u.ac.jp/cgi-bin/fordetailkh21.cgi?name=KH.C9.15;source=kh2013
KH.C13.31	KH2013:KH.C13.31_SPARC	SPARC; SPARCL1; SPOCK3	Cirobu.g00003432	1.65012	1.45722	0.128696	0.2429	0.833462	0	https://www.aniseed.cnrs.fr/aniseed/gene/show_expression?unique_id=Cirobu.g00003432	https://www.aniseed.cnrs.fr/aniseed/gene/show_gene?unique_id=Cirobu.g00003432	http://ghost.zool.kyoto-u.ac.jp/cgi-bin/fordetailkh21.cgi?name=KH.C13.31;source=kh2013
KH.C1.872	KH2013:KH.C1.872_RDH12/14	RDH12; RDH13; RDH14	Cirobu.g00001154	3.81819	1.45494	0.00360724	0.617044	0.219841	0	https://www.aniseed.cnrs.fr/aniseed/gene/show_expression?unique_id=Cirobu.g00001154	https://www.aniseed.cnrs.fr/aniseed/gene/show_gene?unique_id=Cirobu.g00001154	http://ghost.zool.kyoto-u.ac.jp/cgi-bin/fordetailkh21.cgi?name=KH.C1.872;source=kh2013
KH.L41.56	NIMB1/2/4/5	TNXB	Cirobu.g00012610	3.86559	1.44613	0.115925	-1.04589	0.252078	0	https://www.aniseed.cnrs.fr/aniseed/gene/show_expression?unique_id=Cirobu.g00012610	https://www.aniseed.cnrs.fr/aniseed/gene/show_gene?unique_id=Cirobu.g00012610	http://ghost.zool.kyoto-u.ac.jp/cgi-bin/fordetailkh21.cgi?name=KH.L41.56;source=kh2013
KH.C8.903	KH2013:KH.C8.903	KH.C8.903	Cirobu.g00009583	3.0494	1.44539	0.00332535	0.234821	0.641685	0	https://www.aniseed.cnrs.fr/aniseed/gene/show_expression?unique_id=Cirobu.g00009583	https://www.aniseed.cnrs.fr/aniseed/gene/show_gene?unique_id=Cirobu.g00009583	http://ghost.zool.kyoto-u.ac.jp/cgi-bin/fordetailkh21.cgi?name=KH.C8.903;source=kh2013
KH.C1.552	CCDC92	CCDC92	Cirobu.g00000802	5.36769	1.44443	0.000216948	-0.346109	0.374615	0	https://www.aniseed.cnrs.fr/aniseed/gene/show_expression?unique_id=Cirobu.g00000802	https://www.aniseed.cnrs.fr/aniseed/gene/show_gene?unique_id=Cirobu.g00000802	http://ghost.zool.kyoto-u.ac.jp/cgi-bin/fordetailkh21.cgi?name=KH.C1.552;source=kh2013
KH.C8.722	TLR1/15/2/4/6	TLR2; TLR6; TLR8	Cirobu.g00009384	0.165675	1.44113	0.324808	1.15606	0.439501	0	https://www.aniseed.cnrs.fr/aniseed/gene/show_expression?unique_id=Cirobu.g00009384	https://www.aniseed.cnrs.fr/aniseed/gene/show_gene?unique_id=Cirobu.g00009384	http://ghost.zool.kyoto-u.ac.jp/cgi-bin/fordetailkh21.cgi?name=KH.C8.722;source=kh2013
KH.L41.41	KH2013:KH.L41.41_TECTB	KH.L41.41	Cirobu.g00012594	1.05236	1.44104	0.188188	0.739477	0.500153	0	https://www.aniseed.cnrs.fr/aniseed/gene/show_expression?unique_id=Cirobu.g00012594	https://www.aniseed.cnrs.fr/aniseed/gene/show_gene?unique_id=Cirobu.g00012594	http://ghost.zool.kyoto-u.ac.jp/cgi-bin/fordetailkh21.cgi?name=KH.L41.41;source=kh2013
KH.C14.591	LDHA	LDHA; LDHB; LDHC	Cirobu.g00004039	1.43617	1.43888	0.0967768	-1.66069	0.0825659	1	https://www.aniseed.cnrs.fr/aniseed/gene/show_expression?unique_id=Cirobu.g00004039	https://www.aniseed.cnrs.fr/aniseed/gene/show_gene?unique_id=Cirobu.g00004039	http://ghost.zool.kyoto-u.ac.jp/cgi-bin/fordetailkh21.cgi?name=KH.C14.591;source=kh2013
KH.C5.176	CiEnds1	KH.C5.176	Cirobu.g00007039	1.39976	1.43845	0.101782	-1.58675	0.114254	2	https://www.aniseed.cnrs.fr/aniseed/gene/show_expression?unique_id=Cirobu.g00007039	https://www.aniseed.cnrs.fr/aniseed/gene/show_gene?unique_id=Cirobu.g00007039	http://ghost.zool.kyoto-u.ac.jp/cgi-bin/fordetailkh21.cgi?name=KH.C5.176;source=kh2013
KH.L96.13	KIAA1244	ARFGEF1; ARFGEF2; ARFGEF3	Cirobu.g00013354	6.30258	1.43568	0.0106478	-0.966027	0.0830639	0	https://www.aniseed.cnrs.fr/aniseed/gene/show_expression?unique_id=Cirobu.g00013354	https://www.aniseed.cnrs.fr/aniseed/gene/show_gene?unique_id=Cirobu.g00013354	http://ghost.zool.kyoto-u.ac.jp/cgi-bin/fordetailkh21.cgi?name=KH.L96.13;source=kh2013
KH.C10.28	KH2013:KH.C10.28	KH.C10.28	Cirobu.g00001489	0.0898823	1.43303	0.0879642	1.60835	0.068021	0	https://www.aniseed.cnrs.fr/aniseed/gene/show_expression?unique_id=Cirobu.g00001489	https://www.aniseed.cnrs.fr/aniseed/gene/show_gene?unique_id=Cirobu.g00001489	http://ghost.zool.kyoto-u.ac.jp/cgi-bin/fordetailkh21.cgi?name=KH.C10.28;source=kh2013
KH.C12.354	KH2013:KH.C12.354_ALOX5	ALOX15B; ALOX5	Cirobu.g00002902	1.11847	1.43268	0.104946	0.368846	0.717317	1	https://www.aniseed.cnrs.fr/aniseed/gene/show_expression?unique_id=Cirobu.g00002902	https://www.aniseed.cnrs.fr/aniseed/gene/show_gene?unique_id=Cirobu.g00002902	http://ghost.zool.kyoto-u.ac.jp/cgi-bin/fordetailkh21.cgi?name=KH.C12.354;source=kh2013
KH.L19.1	KH2013:KH.L19.1_ROBO1/2	MYOT; OBSCN; TTN	Cirobu.g00012043	2.24656	1.43264	0.103235	0.0685781	0.959035	1	https://www.aniseed.cnrs.fr/aniseed/gene/show_expression?unique_id=Cirobu.g00012043	https://www.aniseed.cnrs.fr/aniseed/gene/show_gene?unique_id=Cirobu.g00012043	http://ghost.zool.kyoto-u.ac.jp/cgi-bin/fordetailkh21.cgi?name=KH.L19.1;source=kh2013
KH.C3.418	WIPI2	WDR45B; WIPI1; WIPI2	Cirobu.g00005597	5.93278	1.42923	0.00323021	-0.639015	0.183499	0	https://www.aniseed.cnrs.fr/aniseed/gene/show_expression?unique_id=Cirobu.g00005597	https://www.aniseed.cnrs.fr/aniseed/gene/show_gene?unique_id=Cirobu.g00005597	http://ghost.zool.kyoto-u.ac.jp/cgi-bin/fordetailkh21.cgi?name=KH.C3.418;source=kh2013
KH.C3.80	FAM71A	FAM71C	Cirobu.g00006006	2.40095	1.42738	0.129966	-0.281453	0.760332	0	https://www.aniseed.cnrs.fr/aniseed/gene/show_expression?unique_id=Cirobu.g00006006	https://www.aniseed.cnrs.fr/aniseed/gene/show_gene?unique_id=Cirobu.g00006006	http://ghost.zool.kyoto-u.ac.jp/cgi-bin/fordetailkh21.cgi?name=KH.C3.80;source=kh2013
KH.C8.703	KH2013:KH.C8.703_ACS-10/14/6	ACSF2; ACSF3; ACSM2A	Cirobu.g00009363	2.16954	1.42717	0.0349979	0.363183	0.60061	0	https://www.aniseed.cnrs.fr/aniseed/gene/show_expression?unique_id=Cirobu.g00009363	https://www.aniseed.cnrs.fr/aniseed/gene/show_gene?unique_id=Cirobu.g00009363	http://ghost.zool.kyoto-u.ac.jp/cgi-bin/fordetailkh21.cgi?name=KH.C8.703;source=kh2013
KH.C8.87	SLC6A11/12/13/2/6/8	SLC6A11; SLC6A12; SLC6A13	Cirobu.g00009545	4.837	1.42591	0.0223874	-0.708232	0.249528	0	https://www.aniseed.cnrs.fr/aniseed/gene/show_expression?unique_id=Cirobu.g00009545	https://www.aniseed.cnrs.fr/aniseed/gene/show_gene?unique_id=Cirobu.g00009545	http://ghost.zool.kyoto-u.ac.jp/cgi-bin/fordetailkh21.cgi?name=KH.C8.87;source=kh2013
KH.C9.585	RABGAP1L	EVI5L; RABGAP1; RABGAP1L	Cirobu.g00010145	6.99028	1.42288	0.000258434	-0.38464	0.317319	0	https://www.aniseed.cnrs.fr/aniseed/gene/show_expression?unique_id=Cirobu.g00010145	https://www.aniseed.cnrs.fr/aniseed/gene/show_gene?unique_id=Cirobu.g00010145	http://ghost.zool.kyoto-u.ac.jp/cgi-bin/fordetailkh21.cgi?name=KH.C9.585;source=kh2013
KH.L155.18	LRRC4C	LRRC4; LRRC4B; LRRC4C	Cirobu.g00011616	3.7983	1.41852	0.0548776	-1.0093	0.169117	0	https://www.aniseed.cnrs.fr/aniseed/gene/show_expression?unique_id=Cirobu.g00011616	https://www.aniseed.cnrs.fr/aniseed/gene/show_gene?unique_id=Cirobu.g00011616	http://ghost.zool.kyoto-u.ac.jp/cgi-bin/fordetailkh21.cgi?name=KH.L155.18;source=kh2013
KH.C5.126	CABZ01080599.1	CEP72; LRRC6; NISCH	Cirobu.g00006985	1.29978	1.41829	0.102174	0.278901	0.771658	0	https://www.aniseed.cnrs.fr/aniseed/gene/show_expression?unique_id=Cirobu.g00006985	https://www.aniseed.cnrs.fr/aniseed/gene/show_gene?unique_id=Cirobu.g00006985	http://ghost.zool.kyoto-u.ac.jp/cgi-bin/fordetailkh21.cgi?name=KH.C5.126;source=kh2013
KH.L18.43	KH2013:KH.L18.43_VWF	OTOG; OTOGL; VWF	Cirobu.g00011981	1.65688	1.41677	0.0673118	-0.212153	0.805446	0	https://www.aniseed.cnrs.fr/aniseed/gene/show_expression?unique_id=Cirobu.g00011981	https://www.aniseed.cnrs.fr/aniseed/gene/show_gene?unique_id=Cirobu.g00011981	http://ghost.zool.kyoto-u.ac.jp/cgi-bin/fordetailkh21.cgi?name=KH.L18.43;source=kh2013
KH.S1003.2	PTPRO	PTPRD; PTPRF	Cirobu.g00013484	0.694927	1.41633	0.504351	-0.678241	0.783221	0	https://www.aniseed.cnrs.fr/aniseed/gene/show_expression?unique_id=Cirobu.g00013484	https://www.aniseed.cnrs.fr/aniseed/gene/show_gene?unique_id=Cirobu.g00013484	http://ghost.zool.kyoto-u.ac.jp/cgi-bin/fordetailkh21.cgi?name=KH.S1003.2;source=kh2013
KH.C6.17	KH2013:KH.C6.17_SLC2A1	SLC2A1; SLC2A5; SLC2A9	Cirobu.g00007691	4.1775	1.41399	0.12224	0.282083	0.758438	0	https://www.aniseed.cnrs.fr/aniseed/gene/show_expression?unique_id=Cirobu.g00007691	https://www.aniseed.cnrs.fr/aniseed/gene/show_gene?unique_id=Cirobu.g00007691	http://ghost.zool.kyoto-u.ac.jp/cgi-bin/fordetailkh21.cgi?name=KH.C6.17;source=kh2013
KH.L113.1	RUFY1/2/3	RUFY1; RUFY2; RUFY3	Cirobu.g00010717	6.16687	1.4086	0.000560129	-0.457889	0.256948	12	https://www.aniseed.cnrs.fr/aniseed/gene/show_expression?unique_id=Cirobu.g00010717	https://www.aniseed.cnrs.fr/aniseed/gene/show_gene?unique_id=Cirobu.g00010717	http://ghost.zool.kyoto-u.ac.jp/cgi-bin/fordetailkh21.cgi?name=KH.L113.1;source=kh2013
KH.C1.1218	SI:CH211-197N1.2	CABP5; CAPS; EFCAB6	Cirobu.g00000242	2.00853	1.40804	0.156579	-0.765026	0.434719	0	https://www.aniseed.cnrs.fr/aniseed/gene/show_expression?unique_id=Cirobu.g00000242	https://www.aniseed.cnrs.fr/aniseed/gene/show_gene?unique_id=Cirobu.g00000242	http://ghost.zool.kyoto-u.ac.jp/cgi-bin/fordetailkh21.cgi?name=KH.C1.1218;source=kh2013
KH.S215.4	LHX3/4	LHX3; LHX4; LHX5	Cirobu.g00014215	4.85926	1.40788	0.0438539	-0.941562	0.172966	86	https://www.aniseed.cnrs.fr/aniseed/gene/show_expression?unique_id=Cirobu.g00014215	https://www.aniseed.cnrs.fr/aniseed/gene/show_gene?unique_id=Cirobu.g00014215	http://ghost.zool.kyoto-u.ac.jp/cgi-bin/fordetailkh21.cgi?name=KH.S215.4;source=kh2013
KH.C7.101	SFN	SFN; YWHAB; YWHAG	Cirobu.g00007919	4.06735	1.39905	0.00120509	-0.368534	0.405484	0	https://www.aniseed.cnrs.fr/aniseed/gene/show_expression?unique_id=Cirobu.g00007919	https://www.aniseed.cnrs.fr/aniseed/gene/show_gene?unique_id=Cirobu.g00007919	http://ghost.zool.kyoto-u.ac.jp/cgi-bin/fordetailkh21.cgi?name=KH.C7.101;source=kh2013
KH.S1271.1	SNAP23/24/25	SNAP23; SNAP25; SNAP29	Cirobu.g00013764	7.03145	1.39833	0.00641714	-0.243372	0.630526	0	https://www.aniseed.cnrs.fr/aniseed/gene/show_expression?unique_id=Cirobu.g00013764	https://www.aniseed.cnrs.fr/aniseed/gene/show_gene?unique_id=Cirobu.g00013764	http://ghost.zool.kyoto-u.ac.jp/cgi-bin/fordetailkh21.cgi?name=KH.S1271.1;source=kh2013
KH.S433.2	KH2013:KH.S433.2	KH.S433.2	Cirobu.g00014511	1.29166	1.39705	0.156163	-2.13277	0.044809	0	https://www.aniseed.cnrs.fr/aniseed/gene/show_expression?unique_id=Cirobu.g00014511	https://www.aniseed.cnrs.fr/aniseed/gene/show_gene?unique_id=Cirobu.g00014511	http://ghost.zool.kyoto-u.ac.jp/cgi-bin/fordetailkh21.cgi?name=KH.S433.2;source=kh2013
KH.S926.2	MUC19/2	MUC5AC; SSPO; VWF	Cirobu.g00015202	0.636419	1.39325	0.485579	-0.278544	0.896331	0	https://www.aniseed.cnrs.fr/aniseed/gene/show_expression?unique_id=Cirobu.g00015202	https://www.aniseed.cnrs.fr/aniseed/gene/show_gene?unique_id=Cirobu.g00015202	http://ghost.zool.kyoto-u.ac.jp/cgi-bin/fordetailkh21.cgi?name=KH.S926.2;source=kh2013
KH.C11.85	KH2013:KH.C11.85_GBH-2	BBOX1; TMLHE	Cirobu.g00002607	4.18988	1.3925	0.0948998	-0.0969377	0.906649	0	https://www.aniseed.cnrs.fr/aniseed/gene/show_expression?unique_id=Cirobu.g00002607	https://www.aniseed.cnrs.fr/aniseed/gene/show_gene?unique_id=Cirobu.g00002607	http://ghost.zool.kyoto-u.ac.jp/cgi-bin/fordetailkh21.cgi?name=KH.C11.85;source=kh2013
KH.C3.487	SLC16A12/8	SLC16A1; SLC16A12; SLC16A7	Cirobu.g00005670	1.51008	1.38434	0.163929	0.777089	0.441883	0	https://www.aniseed.cnrs.fr/aniseed/gene/show_expression?unique_id=Cirobu.g00005670	https://www.aniseed.cnrs.fr/aniseed/gene/show_gene?unique_id=Cirobu.g00005670	http://ghost.zool.kyoto-u.ac.jp/cgi-bin/fordetailkh21.cgi?name=KH.C3.487;source=kh2013
KH.L141.26	KH2013:KH.L141.26	KH.L141.26	Cirobu.g00011179	1.65579	1.38385	0.214142	-2.04361	0.0798131	0	https://www.aniseed.cnrs.fr/aniseed/gene/show_expression?unique_id=Cirobu.g00011179	https://www.aniseed.cnrs.fr/aniseed/gene/show_gene?unique_id=Cirobu.g00011179	http://ghost.zool.kyoto-u.ac.jp/cgi-bin/fordetailkh21.cgi?name=KH.L141.26;source=kh2013
KH.C7.431	ENG1B	EN1; EN2; VAX1	Cirobu.g00008277	1.6363	1.37833	0.261318	0.199614	0.870878	50	https://www.aniseed.cnrs.fr/aniseed/gene/show_expression?unique_id=Cirobu.g00008277	https://www.aniseed.cnrs.fr/aniseed/gene/show_gene?unique_id=Cirobu.g00008277	http://ghost.zool.kyoto-u.ac.jp/cgi-bin/fordetailkh21.cgi?name=KH.C7.431;source=kh2013
KH.C2.456	KH2013:KH.C2.456_MEP1/2/3	KH.C2.456	Cirobu.g00004655	4.47397	1.3768	0.286913	-3.01065	0.0280804	5	https://www.aniseed.cnrs.fr/aniseed/gene/show_expression?unique_id=Cirobu.g00004655	https://www.aniseed.cnrs.fr/aniseed/gene/show_gene?unique_id=Cirobu.g00004655	http://ghost.zool.kyoto-u.ac.jp/cgi-bin/fordetailkh21.cgi?name=KH.C2.456;source=kh2013
KH.L158.1	CHN1/2	CHN1; CHN2; GMIP	Cirobu.g00011649	4.79016	1.37433	0.000265118	0.141663	0.714779	0	https://www.aniseed.cnrs.fr/aniseed/gene/show_expression?unique_id=Cirobu.g00011649	https://www.aniseed.cnrs.fr/aniseed/gene/show_gene?unique_id=Cirobu.g00011649	http://ghost.zool.kyoto-u.ac.jp/cgi-bin/fordetailkh21.cgi?name=KH.L158.1;source=kh2013
KH.L24.21	KH2013:KH.L24.21_TEQUILA	KH.L24.21	Cirobu.g00012219	1.6724	1.37385	0.053466	0.727663	0.315338	0	https://www.aniseed.cnrs.fr/aniseed/gene/show_expression?unique_id=Cirobu.g00012219	https://www.aniseed.cnrs.fr/aniseed/gene/show_gene?unique_id=Cirobu.g00012219	http://ghost.zool.kyoto-u.ac.jp/cgi-bin/fordetailkh21.cgi?name=KH.L24.21;source=kh2013
KH.L96.27	KH2013:KH.L96.27	GNAI1; GNAI2; GNAI3	Cirobu.g00013369	5.42024	1.37258	0.00280993	0.221255	0.628731	0	https://www.aniseed.cnrs.fr/aniseed/gene/show_expression?unique_id=Cirobu.g00013369	https://www.aniseed.cnrs.fr/aniseed/gene/show_gene?unique_id=Cirobu.g00013369	http://ghost.zool.kyoto-u.ac.jp/cgi-bin/fordetailkh21.cgi?name=KH.L96.27;source=kh2013
KH.C3.134	DMP1	KH.C3.134	Cirobu.g00005289	6.61035	1.37224	0.022778	-0.192363	0.745241	0	https://www.aniseed.cnrs.fr/aniseed/gene/show_expression?unique_id=Cirobu.g00005289	https://www.aniseed.cnrs.fr/aniseed/gene/show_gene?unique_id=Cirobu.g00005289	http://ghost.zool.kyoto-u.ac.jp/cgi-bin/fordetailkh21.cgi?name=KH.C3.134;source=kh2013
KH.C10.311	PRKCE	PRKCD; PRKCE; PRKCH	Cirobu.g00001524	5.5617	1.37011	0.000216034	0.191188	0.605146	0	https://www.aniseed.cnrs.fr/aniseed/gene/show_expression?unique_id=Cirobu.g00001524	https://www.aniseed.cnrs.fr/aniseed/gene/show_gene?unique_id=Cirobu.g00001524	http://ghost.zool.kyoto-u.ac.jp/cgi-bin/fordetailkh21.cgi?name=KH.C10.311;source=kh2013
KH.C3.232	KH2013:KH.C3.232	KH.C3.232	Cirobu.g00005397	4.20589	1.36487	0.0722031	-0.101591	0.891898	1	https://www.aniseed.cnrs.fr/aniseed/gene/show_expression?unique_id=Cirobu.g00005397	https://www.aniseed.cnrs.fr/aniseed/gene/show_gene?unique_id=Cirobu.g00005397	http://ghost.zool.kyoto-u.ac.jp/cgi-bin/fordetailkh21.cgi?name=KH.C3.232;source=kh2013
KH.C3.915	MDM1	MDM1	Cirobu.g00006131	5.54762	1.36287	0.000440797	0.0205395	0.963083	0	https://www.aniseed.cnrs.fr/aniseed/gene/show_expression?unique_id=Cirobu.g00006131	https://www.aniseed.cnrs.fr/aniseed/gene/show_gene?unique_id=Cirobu.g00006131	http://ghost.zool.kyoto-u.ac.jp/cgi-bin/fordetailkh21.cgi?name=KH.C3.915;source=kh2013
KH.C1.222	AKR1C2/21	AKR1C1; AKR1C2; AKR1C4	Cirobu.g00000440	5.32592	1.36114	0.0113232	-0.0423712	0.941137	46	https://www.aniseed.cnrs.fr/aniseed/gene/show_expression?unique_id=Cirobu.g00000440	https://www.aniseed.cnrs.fr/aniseed/gene/show_gene?unique_id=Cirobu.g00000440	http://ghost.zool.kyoto-u.ac.jp/cgi-bin/fordetailkh21.cgi?name=KH.C1.222;source=kh2013
KH.L96.68	RIIAD1	CATIP; RIIAD1	Cirobu.g00013414	1.75769	1.36091	0.0639152	-0.853805	0.280064	0	https://www.aniseed.cnrs.fr/aniseed/gene/show_expression?unique_id=Cirobu.g00013414	https://www.aniseed.cnrs.fr/aniseed/gene/show_gene?unique_id=Cirobu.g00013414	http://ghost.zool.kyoto-u.ac.jp/cgi-bin/fordetailkh21.cgi?name=KH.L96.68;source=kh2013
KH.C1.274	MYT1L	MYT1; MYT1L	Cirobu.g00000497	6.99002	1.35865	0.00016304	-0.601161	0.0919442	50	https://www.aniseed.cnrs.fr/aniseed/gene/show_expression?unique_id=Cirobu.g00000497	https://www.aniseed.cnrs.fr/aniseed/gene/show_gene?unique_id=Cirobu.g00000497	http://ghost.zool.kyoto-u.ac.jp/cgi-bin/fordetailkh21.cgi?name=KH.C1.274;source=kh2013
KH.C8.908	GLYCTK	GLYCTK	Cirobu.g00009588	1.63642	1.35829	0.135948	0.549603	0.547165	0	https://www.aniseed.cnrs.fr/aniseed/gene/show_expression?unique_id=Cirobu.g00009588	https://www.aniseed.cnrs.fr/aniseed/gene/show_gene?unique_id=Cirobu.g00009588	http://ghost.zool.kyoto-u.ac.jp/cgi-bin/fordetailkh21.cgi?name=KH.C8.908;source=kh2013
KH.C9.412	KH2013:KH.C9.412	KH.C9.412	Cirobu.g00009956	6.53506	1.35476	0.0288896	-0.367553	0.546783	12	https://www.aniseed.cnrs.fr/aniseed/gene/show_expression?unique_id=Cirobu.g00009956	https://www.aniseed.cnrs.fr/aniseed/gene/show_gene?unique_id=Cirobu.g00009956	http://ghost.zool.kyoto-u.ac.jp/cgi-bin/fordetailkh21.cgi?name=KH.C9.412;source=kh2013
KH.S618.2	MCF2L/2	MCF2; MCF2L; MCF2L2	Cirobu.g00014830	6.89501	1.35402	0.00503364	-0.366653	0.441211	0	https://www.aniseed.cnrs.fr/aniseed/gene/show_expression?unique_id=Cirobu.g00014830	https://www.aniseed.cnrs.fr/aniseed/gene/show_gene?unique_id=Cirobu.g00014830	http://ghost.zool.kyoto-u.ac.jp/cgi-bin/fordetailkh21.cgi?name=KH.S618.2;source=kh2013
KH.C9.37	KH2013:KH.C9.37_RXFP1/2	LHCGR; RXFP1; TSHR	Cirobu.g00009908	0.613667	1.35146	0.353783	0.54565	0.734135	0	https://www.aniseed.cnrs.fr/aniseed/gene/show_expression?unique_id=Cirobu.g00009908	https://www.aniseed.cnrs.fr/aniseed/gene/show_gene?unique_id=Cirobu.g00009908	http://ghost.zool.kyoto-u.ac.jp/cgi-bin/fordetailkh21.cgi?name=KH.C9.37;source=kh2013
KH.C1.285	KH2013:KH.C1.285_CKM	CKB; CKM; CKMT1A	Cirobu.g00000509	3.45976	1.35064	0.0276898	-0.780578	0.200926	0	https://www.aniseed.cnrs.fr/aniseed/gene/show_expression?unique_id=Cirobu.g00000509	https://www.aniseed.cnrs.fr/aniseed/gene/show_gene?unique_id=Cirobu.g00000509	http://ghost.zool.kyoto-u.ac.jp/cgi-bin/fordetailkh21.cgi?name=KH.C1.285;source=kh2013
KH.L53.18	CG34114	DSCAM; DSCAML1; HMCN2	Cirobu.g00012769	5.44853	1.35059	0.0168488	-0.0222397	0.966554	0	https://www.aniseed.cnrs.fr/aniseed/gene/show_expression?unique_id=Cirobu.g00012769	https://www.aniseed.cnrs.fr/aniseed/gene/show_gene?unique_id=Cirobu.g00012769	http://ghost.zool.kyoto-u.ac.jp/cgi-bin/fordetailkh21.cgi?name=KH.L53.18;source=kh2013
KH.C2.236	COL6A1/2/3/5/6	COL14A1; COL24A1; COL6A2	Cirobu.g00004415	1.63405	1.34937	0.3285	-1.79095	0.20439	4	https://www.aniseed.cnrs.fr/aniseed/gene/show_expression?unique_id=Cirobu.g00004415	https://www.aniseed.cnrs.fr/aniseed/gene/show_gene?unique_id=Cirobu.g00004415	http://ghost.zool.kyoto-u.ac.jp/cgi-bin/fordetailkh21.cgi?name=KH.C2.236;source=kh2013
KH.C1.947	NAPG	NAPG	Cirobu.g00001236	5.42396	1.34758	0.00722759	-0.360653	0.469174	0	https://www.aniseed.cnrs.fr/aniseed/gene/show_expression?unique_id=Cirobu.g00001236	https://www.aniseed.cnrs.fr/aniseed/gene/show_gene?unique_id=Cirobu.g00001236	http://ghost.zool.kyoto-u.ac.jp/cgi-bin/fordetailkh21.cgi?name=KH.C1.947;source=kh2013
KH.S1158.1	KH2013:KH.S1158.1	KH.S1158.1	Cirobu.g00013671	0.95906	1.34718	0.0933144	0.660007	0.40823	0	https://www.aniseed.cnrs.fr/aniseed/gene/show_expression?unique_id=Cirobu.g00013671	https://www.aniseed.cnrs.fr/aniseed/gene/show_gene?unique_id=Cirobu.g00013671	http://ghost.zool.kyoto-u.ac.jp/cgi-bin/fordetailkh21.cgi?name=KH.S1158.1;source=kh2013
KH.S1075.2	Ci-R1CiGC25e03	KH.S1075.2	Cirobu.g00013567	0.329117	1.34664	0.282554	-2.50152	0.0524481	0	https://www.aniseed.cnrs.fr/aniseed/gene/show_expression?unique_id=Cirobu.g00013567	https://www.aniseed.cnrs.fr/aniseed/gene/show_gene?unique_id=Cirobu.g00013567	http://ghost.zool.kyoto-u.ac.jp/cgi-bin/fordetailkh21.cgi?name=KH.S1075.2;source=kh2013
KH.C11.324	KCNJ5/6/9	KCNJ3; KCNJ5; KCNJ6	Cirobu.g00002148	3.39868	1.34639	0.0451507	-0.648051	0.340009	0	https://www.aniseed.cnrs.fr/aniseed/gene/show_expression?unique_id=Cirobu.g00002148	https://www.aniseed.cnrs.fr/aniseed/gene/show_gene?unique_id=Cirobu.g00002148	http://ghost.zool.kyoto-u.ac.jp/cgi-bin/fordetailkh21.cgi?name=KH.C11.324;source=kh2013
KH.C2.678	BX510316.1	PKD1L2; PKD2; PKD2L1	Cirobu.g00004900	3.23688	1.34631	0.0106346	0.668875	0.209066	0	https://www.aniseed.cnrs.fr/aniseed/gene/show_expression?unique_id=Cirobu.g00004900	https://www.aniseed.cnrs.fr/aniseed/gene/show_gene?unique_id=Cirobu.g00004900	http://ghost.zool.kyoto-u.ac.jp/cgi-bin/fordetailkh21.cgi?name=KH.C2.678;source=kh2013
KH.C5.220	KH2013:KH.C5.220	KH.C5.220	Cirobu.g00007089	0.996155	1.34308	0.0584996	0.328684	0.671773	0	https://www.aniseed.cnrs.fr/aniseed/gene/show_expression?unique_id=Cirobu.g00007089	https://www.aniseed.cnrs.fr/aniseed/gene/show_gene?unique_id=Cirobu.g00007089	http://ghost.zool.kyoto-u.ac.jp/cgi-bin/fordetailkh21.cgi?name=KH.C5.220;source=kh2013
KH.S1182.2	KH2013:KH.S1182.2_TMED6	TMED2; TMED7; TMED7-TICAM2	Cirobu.g00013690	1.88736	1.34012	0.353461	-1.9219	0.199083	1	https://www.aniseed.cnrs.fr/aniseed/gene/show_expression?unique_id=Cirobu.g00013690	https://www.aniseed.cnrs.fr/aniseed/gene/show_gene?unique_id=Cirobu.g00013690	http://ghost.zool.kyoto-u.ac.jp/cgi-bin/fordetailkh21.cgi?name=KH.S1182.2;source=kh2013
KH.L138.1	PLCB4	PLCB1; PLCB3; PLCB4	Cirobu.g00011120	4.77451	1.33895	0.00285463	-0.67275	0.130951	0	https://www.aniseed.cnrs.fr/aniseed/gene/show_expression?unique_id=Cirobu.g00011120	https://www.aniseed.cnrs.fr/aniseed/gene/show_gene?unique_id=Cirobu.g00011120	http://ghost.zool.kyoto-u.ac.jp/cgi-bin/fordetailkh21.cgi?name=KH.L138.1;source=kh2013
KH.C3.389	RAB2A	RAB14; RAB2A; RAB2B	Cirobu.g00005565	7.76934	1.33473	0.00255262	-0.421029	0.334394	4	https://www.aniseed.cnrs.fr/aniseed/gene/show_expression?unique_id=Cirobu.g00005565	https://www.aniseed.cnrs.fr/aniseed/gene/show_gene?unique_id=Cirobu.g00005565	http://ghost.zool.kyoto-u.ac.jp/cgi-bin/fordetailkh21.cgi?name=KH.C3.389;source=kh2013
KH.C5.351	KH2013:KH.C5.351_PSG1/11/2/3/4/5/6/7/8/9	CHIA; CHIT1; HMCN2	Cirobu.g00007227	5.01984	1.33262	0.148993	-0.3567	0.694408	1	https://www.aniseed.cnrs.fr/aniseed/gene/show_expression?unique_id=Cirobu.g00007227	https://www.aniseed.cnrs.fr/aniseed/gene/show_gene?unique_id=Cirobu.g00007227	http://ghost.zool.kyoto-u.ac.jp/cgi-bin/fordetailkh21.cgi?name=KH.C5.351;source=kh2013
KH.S837.1	KH2013:KH.S837.1_METTL24	METTL24	Cirobu.g00015108	0.934764	1.32958	0.249371	0.153858	0.949029	0	https://www.aniseed.cnrs.fr/aniseed/gene/show_expression?unique_id=Cirobu.g00015108	https://www.aniseed.cnrs.fr/aniseed/gene/show_gene?unique_id=Cirobu.g00015108	http://ghost.zool.kyoto-u.ac.jp/cgi-bin/fordetailkh21.cgi?name=KH.S837.1;source=kh2013
KH.L147.5	TMEM164	TMEM164	Cirobu.g00011323	4.32967	1.32909	0.00282335	-0.0716342	0.878715	0	https://www.aniseed.cnrs.fr/aniseed/gene/show_expression?unique_id=Cirobu.g00011323	https://www.aniseed.cnrs.fr/aniseed/gene/show_gene?unique_id=Cirobu.g00011323	http://ghost.zool.kyoto-u.ac.jp/cgi-bin/fordetailkh21.cgi?name=KH.L147.5;source=kh2013
KH.C9.868	KH2013:KH.C9.868	KH.C9.868	Cirobu.g00010456	0.615072	1.32845	0.371424	-0.802708	0.584007	0	https://www.aniseed.cnrs.fr/aniseed/gene/show_expression?unique_id=Cirobu.g00010456	https://www.aniseed.cnrs.fr/aniseed/gene/show_gene?unique_id=Cirobu.g00010456	http://ghost.zool.kyoto-u.ac.jp/cgi-bin/fordetailkh21.cgi?name=KH.C9.868;source=kh2013
KH.C11.102	PIWIL1/3/4	PIWIL1; PIWIL4	Cirobu.g00001907	5.95758	1.3263	0.00106412	0.343122	0.391383	9	https://www.aniseed.cnrs.fr/aniseed/gene/show_expression?unique_id=Cirobu.g00001907	https://www.aniseed.cnrs.fr/aniseed/gene/show_gene?unique_id=Cirobu.g00001907	http://ghost.zool.kyoto-u.ac.jp/cgi-bin/fordetailkh21.cgi?name=KH.C11.102;source=kh2013
KH.C10.7	TFPT	TFPT	Cirobu.g00001871	1.64573	1.32186	0.0622285	-0.719299	0.337585	0	https://www.aniseed.cnrs.fr/aniseed/gene/show_expression?unique_id=Cirobu.g00001871	https://www.aniseed.cnrs.fr/aniseed/gene/show_gene?unique_id=Cirobu.g00001871	http://ghost.zool.kyoto-u.ac.jp/cgi-bin/fordetailkh21.cgi?name=KH.C10.7;source=kh2013
KH.C7.498	ADRA1D	ADRA1A; ADRA1B; ADRA1D	Cirobu.g00008350	0.370681	1.32081	0.18313	0.379734	0.74813	0	https://www.aniseed.cnrs.fr/aniseed/gene/show_expression?unique_id=Cirobu.g00008350	https://www.aniseed.cnrs.fr/aniseed/gene/show_gene?unique_id=Cirobu.g00008350	http://ghost.zool.kyoto-u.ac.jp/cgi-bin/fordetailkh21.cgi?name=KH.C7.498;source=kh2013
KH.L96.7	SPPL3	HM13; SPPL2B; SPPL3	Cirobu.g00013416	6.67437	1.31992	0.00551666	-0.314884	0.502109	0	https://www.aniseed.cnrs.fr/aniseed/gene/show_expression?unique_id=Cirobu.g00013416	https://www.aniseed.cnrs.fr/aniseed/gene/show_gene?unique_id=Cirobu.g00013416	http://ghost.zool.kyoto-u.ac.jp/cgi-bin/fordetailkh21.cgi?name=KH.L96.7;source=kh2013
KH.C3.266	SIRT7	SIRT4; SIRT6; SIRT7	Cirobu.g00005432	4.10926	1.31831	0.00195725	0.0144543	0.992732	9	https://www.aniseed.cnrs.fr/aniseed/gene/show_expression?unique_id=Cirobu.g00005432	https://www.aniseed.cnrs.fr/aniseed/gene/show_gene?unique_id=Cirobu.g00005432	http://ghost.zool.kyoto-u.ac.jp/cgi-bin/fordetailkh21.cgi?name=KH.C3.266;source=kh2013
KH.C5.458	VPS17	KH.C5.458	Cirobu.g00007344	1.03882	1.31711	0.232967	0.0258983	1	0	https://www.aniseed.cnrs.fr/aniseed/gene/show_expression?unique_id=Cirobu.g00007344	https://www.aniseed.cnrs.fr/aniseed/gene/show_gene?unique_id=Cirobu.g00007344	http://ghost.zool.kyoto-u.ac.jp/cgi-bin/fordetailkh21.cgi?name=KH.C5.458;source=kh2013
KH.C7.664	KH2013:KH.C7.664_MIB/1	MIB1; MIB2	Cirobu.g00008532	4.15934	1.31571	0.134262	0.0396026	0.96918	0	https://www.aniseed.cnrs.fr/aniseed/gene/show_expression?unique_id=Cirobu.g00008532	https://www.aniseed.cnrs.fr/aniseed/gene/show_gene?unique_id=Cirobu.g00008532	http://ghost.zool.kyoto-u.ac.jp/cgi-bin/fordetailkh21.cgi?name=KH.C7.664;source=kh2013
KH.L4.45	KH2013:KH.L4.45	KH.L4.45	Cirobu.g00012513	2.47757	1.31515	0.165654	-1.28242	0.180373	0	https://www.aniseed.cnrs.fr/aniseed/gene/show_expression?unique_id=Cirobu.g00012513	https://www.aniseed.cnrs.fr/aniseed/gene/show_gene?unique_id=Cirobu.g00012513	http://ghost.zool.kyoto-u.ac.jp/cgi-bin/fordetailkh21.cgi?name=KH.L4.45;source=kh2013
KH.C11.460	SLC10A3/5	SLC10A2; SLC10A3; SLC10A5	Cirobu.g00002295	5.0523	1.3137	0.00841808	0.249864	0.613259	2	https://www.aniseed.cnrs.fr/aniseed/gene/show_expression?unique_id=Cirobu.g00002295	https://www.aniseed.cnrs.fr/aniseed/gene/show_gene?unique_id=Cirobu.g00002295	http://ghost.zool.kyoto-u.ac.jp/cgi-bin/fordetailkh21.cgi?name=KH.C11.460;source=kh2013
KH.C9.235	RGS2/21/3	RGS1; RGS2; RGS5	Cirobu.g00009762	2.17607	1.31216	0.0898637	-0.451238	0.563663	1	https://www.aniseed.cnrs.fr/aniseed/gene/show_expression?unique_id=Cirobu.g00009762	https://www.aniseed.cnrs.fr/aniseed/gene/show_gene?unique_id=Cirobu.g00009762	http://ghost.zool.kyoto-u.ac.jp/cgi-bin/fordetailkh21.cgi?name=KH.C9.235;source=kh2013
KH.C5.564	GIPC1/2/3	GIPC1; GIPC2; GIPC3	Cirobu.g00007462	4.42119	1.31059	0.000419149	-0.0533359	0.892358	0	https://www.aniseed.cnrs.fr/aniseed/gene/show_expression?unique_id=Cirobu.g00007462	https://www.aniseed.cnrs.fr/aniseed/gene/show_gene?unique_id=Cirobu.g00007462	http://ghost.zool.kyoto-u.ac.jp/cgi-bin/fordetailkh21.cgi?name=KH.C5.564;source=kh2013
KH.C10.457	KH2013:KH.C10.457_T05B4.12/13/8	EFEMP2; FBLN1; FBLN5	Cirobu.g00001679	8.20159	1.30951	0.0341307	-0.460962	0.449588	0	https://www.aniseed.cnrs.fr/aniseed/gene/show_expression?unique_id=Cirobu.g00001679	https://www.aniseed.cnrs.fr/aniseed/gene/show_gene?unique_id=Cirobu.g00001679	http://ghost.zool.kyoto-u.ac.jp/cgi-bin/fordetailkh21.cgi?name=KH.C10.457;source=kh2013
KH.C1.165	VAMP1/2/3	VAMP1; VAMP2; VAMP3	Cirobu.g00000376	8.31142	1.30922	0.000183067	-0.143887	0.677205	9	https://www.aniseed.cnrs.fr/aniseed/gene/show_expression?unique_id=Cirobu.g00000376	https://www.aniseed.cnrs.fr/aniseed/gene/show_gene?unique_id=Cirobu.g00000376	http://ghost.zool.kyoto-u.ac.jp/cgi-bin/fordetailkh21.cgi?name=KH.C1.165;source=kh2013
KH.C6.289	KH2013:KH.C6.289	KH.C6.289	Cirobu.g00007820	5.20575	1.30896	0.180607	0.92784	0.33908	0	https://www.aniseed.cnrs.fr/aniseed/gene/show_expression?unique_id=Cirobu.g00007820	https://www.aniseed.cnrs.fr/aniseed/gene/show_gene?unique_id=Cirobu.g00007820	http://ghost.zool.kyoto-u.ac.jp/cgi-bin/fordetailkh21.cgi?name=KH.C6.289;source=kh2013
KH.C1.1045	KH2013:KH.C1.1045_LRRC15	CPN2; LGR5; LRRC15	Cirobu.g00000053	2.72666	1.30455	0.0959844	0.8147	0.30331	0	https://www.aniseed.cnrs.fr/aniseed/gene/show_expression?unique_id=Cirobu.g00000053	https://www.aniseed.cnrs.fr/aniseed/gene/show_gene?unique_id=Cirobu.g00000053	http://ghost.zool.kyoto-u.ac.jp/cgi-bin/fordetailkh21.cgi?name=KH.C1.1045;source=kh2013
KH.C1.111	AGAP1/2/3/9	AGAP1; AGAP3; AGAP4	Cirobu.g00000125	5.90841	1.30249	0.00581056	-0.673373	0.15106	10	https://www.aniseed.cnrs.fr/aniseed/gene/show_expression?unique_id=Cirobu.g00000125	https://www.aniseed.cnrs.fr/aniseed/gene/show_gene?unique_id=Cirobu.g00000125	http://ghost.zool.kyoto-u.ac.jp/cgi-bin/fordetailkh21.cgi?name=KH.C1.111;source=kh2013
KH.C5.412	KH2013:KH.C5.412	KH.C5.412	Cirobu.g00007294	1.20579	1.30158	0.135022	-1.60387	0.084242	0	https://www.aniseed.cnrs.fr/aniseed/gene/show_expression?unique_id=Cirobu.g00007294	https://www.aniseed.cnrs.fr/aniseed/gene/show_gene?unique_id=Cirobu.g00007294	http://ghost.zool.kyoto-u.ac.jp/cgi-bin/fordetailkh21.cgi?name=KH.C5.412;source=kh2013
KH.S514.1	TPPP/2/3	TPPP; TPPP2; TPPP3	Cirobu.g00014603	1.02911	1.29554	0.147208	0.674207	0.474569	0	https://www.aniseed.cnrs.fr/aniseed/gene/show_expression?unique_id=Cirobu.g00014603	https://www.aniseed.cnrs.fr/aniseed/gene/show_gene?unique_id=Cirobu.g00014603	http://ghost.zool.kyoto-u.ac.jp/cgi-bin/fordetailkh21.cgi?name=KH.S514.1;source=kh2013
KH.C8.688	GUCY1A2/3	GUCY1A1; GUCY1A2; GUCY1B1	Cirobu.g00009345	4.5998	1.29502	0.113158	-1.19299	0.143612	0	https://www.aniseed.cnrs.fr/aniseed/gene/show_expression?unique_id=Cirobu.g00009345	https://www.aniseed.cnrs.fr/aniseed/gene/show_gene?unique_id=Cirobu.g00009345	http://ghost.zool.kyoto-u.ac.jp/cgi-bin/fordetailkh21.cgi?name=KH.C8.688;source=kh2013
KH.C13.127	TP53INP1/2	TP53INP1; TP53INP2	Cirobu.g00003341	8.83452	1.29136	0.00468702	-0.406617	0.366679	7	https://www.aniseed.cnrs.fr/aniseed/gene/show_expression?unique_id=Cirobu.g00003341	https://www.aniseed.cnrs.fr/aniseed/gene/show_gene?unique_id=Cirobu.g00003341	http://ghost.zool.kyoto-u.ac.jp/cgi-bin/fordetailkh21.cgi?name=KH.C13.127;source=kh2013
KH.C4.428	T07H6.4	CR1; CSMD3; SVEP1	Cirobu.g00006518	3.00275	1.29133	0.0693149	-0.999045	0.166371	0	https://www.aniseed.cnrs.fr/aniseed/gene/show_expression?unique_id=Cirobu.g00006518	https://www.aniseed.cnrs.fr/aniseed/gene/show_gene?unique_id=Cirobu.g00006518	http://ghost.zool.kyoto-u.ac.jp/cgi-bin/fordetailkh21.cgi?name=KH.C4.428;source=kh2013
KH.C2.101	SYT1/2	SYT1; SYT2; SYT5	Cirobu.g00004124	8.87463	1.29112	0.00413623	-0.0960437	0.828554	4	https://www.aniseed.cnrs.fr/aniseed/gene/show_expression?unique_id=Cirobu.g00004124	https://www.aniseed.cnrs.fr/aniseed/gene/show_gene?unique_id=Cirobu.g00004124	http://ghost.zool.kyoto-u.ac.jp/cgi-bin/fordetailkh21.cgi?name=KH.C2.101;source=kh2013
KH.S1155.1	KH2013:KH.S1155.1_GABBR2	GABBR1; GABBR2	Cirobu.g00013669	4.23512	1.28945	0.00223459	0.199229	0.633833	2	https://www.aniseed.cnrs.fr/aniseed/gene/show_expression?unique_id=Cirobu.g00013669	https://www.aniseed.cnrs.fr/aniseed/gene/show_gene?unique_id=Cirobu.g00013669	http://ghost.zool.kyoto-u.ac.jp/cgi-bin/fordetailkh21.cgi?name=KH.S1155.1;source=kh2013
KH.C1.240	TACC/1/2/3	TACC1; TACC2; TACC3	Cirobu.g00000460	6.50983	1.28792	0.00391986	-0.508294	0.251086	0	https://www.aniseed.cnrs.fr/aniseed/gene/show_expression?unique_id=Cirobu.g00000460	https://www.aniseed.cnrs.fr/aniseed/gene/show_gene?unique_id=Cirobu.g00000460	http://ghost.zool.kyoto-u.ac.jp/cgi-bin/fordetailkh21.cgi?name=KH.C1.240;source=kh2013
KH.L38.13	KH2013:KH.L38.13_FRMPD4	FRMPD1; FRMPD3; FRMPD4	Cirobu.g00012454	2.70931	1.28745	0.118251	-0.54021	0.504153	0	https://www.aniseed.cnrs.fr/aniseed/gene/show_expression?unique_id=Cirobu.g00012454	https://www.aniseed.cnrs.fr/aniseed/gene/show_gene?unique_id=Cirobu.g00012454	http://ghost.zool.kyoto-u.ac.jp/cgi-bin/fordetailkh21.cgi?name=KH.L38.13;source=kh2013
KH.C1.64	F28H1.4	KH.C1.64	Cirobu.g00000897	2.08774	1.28166	0.0265649	0.526946	0.385305	0	https://www.aniseed.cnrs.fr/aniseed/gene/show_expression?unique_id=Cirobu.g00000897	https://www.aniseed.cnrs.fr/aniseed/gene/show_gene?unique_id=Cirobu.g00000897	http://ghost.zool.kyoto-u.ac.jp/cgi-bin/fordetailkh21.cgi?name=KH.C1.64;source=kh2013
KH.C11.549	KH2013:KH.C11.549_GLCE	GLCE	Cirobu.g00002390	4.67597	1.27819	0.000697234	-0.33446	0.373565	8	https://www.aniseed.cnrs.fr/aniseed/gene/show_expression?unique_id=Cirobu.g00002390	https://www.aniseed.cnrs.fr/aniseed/gene/show_gene?unique_id=Cirobu.g00002390	http://ghost.zool.kyoto-u.ac.jp/cgi-bin/fordetailkh21.cgi?name=KH.C11.549;source=kh2013
KH.S529.6	KH2013:KH.S529.6	KH.S529.6	Cirobu.g00014640	1.3234	1.27798	0.469853	-0.497102	0.776709	0	https://www.aniseed.cnrs.fr/aniseed/gene/show_expression?unique_id=Cirobu.g00014640	https://www.aniseed.cnrs.fr/aniseed/gene/show_gene?unique_id=Cirobu.g00014640	http://ghost.zool.kyoto-u.ac.jp/cgi-bin/fordetailkh21.cgi?name=KH.S529.6;source=kh2013
KH.C4.367	KH2013:KH.C4.367_DNHD1	DNAH10; DNHD1	Cirobu.g00006452	1.14164	1.27717	0.312613	0.400958	0.778775	0	https://www.aniseed.cnrs.fr/aniseed/gene/show_expression?unique_id=Cirobu.g00006452	https://www.aniseed.cnrs.fr/aniseed/gene/show_gene?unique_id=Cirobu.g00006452	http://ghost.zool.kyoto-u.ac.jp/cgi-bin/fordetailkh21.cgi?name=KH.C4.367;source=kh2013
KH.C12.687	KH2013:KH.C12.687	KH.C12.687	Cirobu.g00003266	5.87422	1.27405	0.0133739	-0.554522	0.281116	0	https://www.aniseed.cnrs.fr/aniseed/gene/show_expression?unique_id=Cirobu.g00003266	https://www.aniseed.cnrs.fr/aniseed/gene/show_gene?unique_id=Cirobu.g00003266	http://ghost.zool.kyoto-u.ac.jp/cgi-bin/fordetailkh21.cgi?name=KH.C12.687;source=kh2013
KH.L131.6	PCYT2	PCYT1A; PCYT1B; PCYT2	Cirobu.g00011038	7.41379	1.27383	0.00158806	-0.110167	0.78285	0	https://www.aniseed.cnrs.fr/aniseed/gene/show_expression?unique_id=Cirobu.g00011038	https://www.aniseed.cnrs.fr/aniseed/gene/show_gene?unique_id=Cirobu.g00011038	http://ghost.zool.kyoto-u.ac.jp/cgi-bin/fordetailkh21.cgi?name=KH.L131.6;source=kh2013
KH.C6.138	KH2013:KH.C6.138	KH.C6.138	Cirobu.g00007656	4.77127	1.2724	0.0298646	-0.0602373	0.919891	0	https://www.aniseed.cnrs.fr/aniseed/gene/show_expression?unique_id=Cirobu.g00007656	https://www.aniseed.cnrs.fr/aniseed/gene/show_gene?unique_id=Cirobu.g00007656	http://ghost.zool.kyoto-u.ac.jp/cgi-bin/fordetailkh21.cgi?name=KH.C6.138;source=kh2013
KH.L13.1	AMACR	AMACR; SUGCT	Cirobu.g00010977	1.74341	1.27238	0.0878762	1.46341	0.0490922	0	https://www.aniseed.cnrs.fr/aniseed/gene/show_expression?unique_id=Cirobu.g00010977	https://www.aniseed.cnrs.fr/aniseed/gene/show_gene?unique_id=Cirobu.g00010977	http://ghost.zool.kyoto-u.ac.jp/cgi-bin/fordetailkh21.cgi?name=KH.L13.1;source=kh2013
KH.C5.576	KH2013:KH.C5.576	KH.C5.576	Cirobu.g00007475	0.405077	1.27131	0.136541	0.798096	0.373953	0	https://www.aniseed.cnrs.fr/aniseed/gene/show_expression?unique_id=Cirobu.g00007475	https://www.aniseed.cnrs.fr/aniseed/gene/show_gene?unique_id=Cirobu.g00007475	http://ghost.zool.kyoto-u.ac.jp/cgi-bin/fordetailkh21.cgi?name=KH.C5.576;source=kh2013
KH.C5.402	KH2013:KH.C5.402_CYP-33C1/11/12/3/4/5/6/7/8	CYP2D6; CYP2J2; CYP2U1	Cirobu.g00007283	1.79014	1.27105	0.409803	-0.139169	0.925484	0	https://www.aniseed.cnrs.fr/aniseed/gene/show_expression?unique_id=Cirobu.g00007283	https://www.aniseed.cnrs.fr/aniseed/gene/show_gene?unique_id=Cirobu.g00007283	http://ghost.zool.kyoto-u.ac.jp/cgi-bin/fordetailkh21.cgi?name=KH.C5.402;source=kh2013
KH.L37.32	KH2013:KH.L37.32_R05H10.1/7	KH.L37.32	Cirobu.g00012395	1.45773	1.27101	0.309977	-1.24525	0.325294	1	https://www.aniseed.cnrs.fr/aniseed/gene/show_expression?unique_id=Cirobu.g00012395	https://www.aniseed.cnrs.fr/aniseed/gene/show_gene?unique_id=Cirobu.g00012395	http://ghost.zool.kyoto-u.ac.jp/cgi-bin/fordetailkh21.cgi?name=KH.L37.32;source=kh2013
KH.L152.32	MCTP/1/2	DOC2A; MCTP1; MCTP2	Cirobu.g00011409	4.99504	1.27078	0.00723162	-0.640599	0.176497	0	https://www.aniseed.cnrs.fr/aniseed/gene/show_expression?unique_id=Cirobu.g00011409	https://www.aniseed.cnrs.fr/aniseed/gene/show_gene?unique_id=Cirobu.g00011409	http://ghost.zool.kyoto-u.ac.jp/cgi-bin/fordetailkh21.cgi?name=KH.L152.32;source=kh2013
KH.C14.150	CU856140.1	KH.C14.150	Cirobu.g00003562	1.44896	1.26829	0.0986664	-0.0762528	0.947154	0	https://www.aniseed.cnrs.fr/aniseed/gene/show_expression?unique_id=Cirobu.g00003562	https://www.aniseed.cnrs.fr/aniseed/gene/show_gene?unique_id=Cirobu.g00003562	http://ghost.zool.kyoto-u.ac.jp/cgi-bin/fordetailkh21.cgi?name=KH.C14.150;source=kh2013
KH.L167.5	SLC6A11	SLC6A11; SLC6A12; SLC6A13	Cirobu.g00011713	8.01054	1.26685	0.00221099	-0.829328	0.0438635	0	https://www.aniseed.cnrs.fr/aniseed/gene/show_expression?unique_id=Cirobu.g00011713	https://www.aniseed.cnrs.fr/aniseed/gene/show_gene?unique_id=Cirobu.g00011713	http://ghost.zool.kyoto-u.ac.jp/cgi-bin/fordetailkh21.cgi?name=KH.L167.5;source=kh2013
KH.C4.459	KH2013:KH.C4.459_RIPK1	ANKK1; RIPK1; RIPK4	Cirobu.g00006552	1.0606	1.26543	0.187161	1.00244	0.291742	0	https://www.aniseed.cnrs.fr/aniseed/gene/show_expression?unique_id=Cirobu.g00006552	https://www.aniseed.cnrs.fr/aniseed/gene/show_gene?unique_id=Cirobu.g00006552	http://ghost.zool.kyoto-u.ac.jp/cgi-bin/fordetailkh21.cgi?name=KH.C4.459;source=kh2013
KH.C12.204	GRID1/2	GRID1; GRID2; GRIK3	Cirobu.g00002737	6.20495	1.2654	0.481767	0.800736	0.653825	0	https://www.aniseed.cnrs.fr/aniseed/gene/show_expression?unique_id=Cirobu.g00002737	https://www.aniseed.cnrs.fr/aniseed/gene/show_gene?unique_id=Cirobu.g00002737	http://ghost.zool.kyoto-u.ac.jp/cgi-bin/fordetailkh21.cgi?name=KH.C12.204;source=kh2013
KH.C7.605	CNGA3	CNGA1; CNGA2; CNGA3	Cirobu.g00008468	2.01538	1.26219	0.238363	-0.821844	0.466179	6	https://www.aniseed.cnrs.fr/aniseed/gene/show_expression?unique_id=Cirobu.g00008468	https://www.aniseed.cnrs.fr/aniseed/gene/show_gene?unique_id=Cirobu.g00008468	http://ghost.zool.kyoto-u.ac.jp/cgi-bin/fordetailkh21.cgi?name=KH.C7.605;source=kh2013
KH.S215.2	KH2013:KH.S215.2	KH.S215.2	Cirobu.g00014208	1.62524	1.26196	0.150387	0.0940488	0.941173	0	https://www.aniseed.cnrs.fr/aniseed/gene/show_expression?unique_id=Cirobu.g00014208	https://www.aniseed.cnrs.fr/aniseed/gene/show_gene?unique_id=Cirobu.g00014208	http://ghost.zool.kyoto-u.ac.jp/cgi-bin/fordetailkh21.cgi?name=KH.S215.2;source=kh2013
KH.C11.341	KH2013:KH.C11.341_CPPED1	CPPED1	Cirobu.g00002166	6.40616	1.26042	0.00435125	-0.383464	0.380721	0	https://www.aniseed.cnrs.fr/aniseed/gene/show_expression?unique_id=Cirobu.g00002166	https://www.aniseed.cnrs.fr/aniseed/gene/show_gene?unique_id=Cirobu.g00002166	http://ghost.zool.kyoto-u.ac.jp/cgi-bin/fordetailkh21.cgi?name=KH.C11.341;source=kh2013
KH.C7.37	KH2013:KH.C7.37_GPR84	CCKAR; CCKBR; GPR84	Cirobu.g00008210	1.35283	1.25966	0.233098	0.93999	0.382783	2	https://www.aniseed.cnrs.fr/aniseed/gene/show_expression?unique_id=Cirobu.g00008210	https://www.aniseed.cnrs.fr/aniseed/gene/show_gene?unique_id=Cirobu.g00008210	http://ghost.zool.kyoto-u.ac.jp/cgi-bin/fordetailkh21.cgi?name=KH.C7.37;source=kh2013
KH.C8.664	PTPDC1	CDC14A; CDC14B; PTPDC1	Cirobu.g00009319	5.10898	1.25719	0.00151858	-0.688733	0.0813237	0	https://www.aniseed.cnrs.fr/aniseed/gene/show_expression?unique_id=Cirobu.g00009319	https://www.aniseed.cnrs.fr/aniseed/gene/show_gene?unique_id=Cirobu.g00009319	http://ghost.zool.kyoto-u.ac.jp/cgi-bin/fordetailkh21.cgi?name=KH.C8.664;source=kh2013
KH.C8.371	ENO/1/2/3	ENO1; ENO2; ENO3	Cirobu.g00008998	3.62497	1.24891	0.00888994	-0.169652	0.731502	0	https://www.aniseed.cnrs.fr/aniseed/gene/show_expression?unique_id=Cirobu.g00008998	https://www.aniseed.cnrs.fr/aniseed/gene/show_gene?unique_id=Cirobu.g00008998	http://ghost.zool.kyoto-u.ac.jp/cgi-bin/fordetailkh21.cgi?name=KH.C8.371;source=kh2013
KH.C7.756	TDP2	TDP2	Cirobu.g00008634	3.87886	1.2454	0.103052	0.961907	0.209272	0	https://www.aniseed.cnrs.fr/aniseed/gene/show_expression?unique_id=Cirobu.g00008634	https://www.aniseed.cnrs.fr/aniseed/gene/show_gene?unique_id=Cirobu.g00008634	http://ghost.zool.kyoto-u.ac.jp/cgi-bin/fordetailkh21.cgi?name=KH.C7.756;source=kh2013
KH.C5.133	KH2013:KH.C5.133	HYAL1; HYAL2; HYAL4	Cirobu.g00006993	2.46827	1.24515	0.0583539	-0.276302	0.673443	0	https://www.aniseed.cnrs.fr/aniseed/gene/show_expression?unique_id=Cirobu.g00006993	https://www.aniseed.cnrs.fr/aniseed/gene/show_gene?unique_id=Cirobu.g00006993	http://ghost.zool.kyoto-u.ac.jp/cgi-bin/fordetailkh21.cgi?name=KH.C5.133;source=kh2013
KH.C7.193	KH2013:KH.C7.193	KH.C7.193	Cirobu.g00008017	2.48379	1.24409	0.0653051	-0.0985256	0.886081	0	https://www.aniseed.cnrs.fr/aniseed/gene/show_expression?unique_id=Cirobu.g00008017	https://www.aniseed.cnrs.fr/aniseed/gene/show_gene?unique_id=Cirobu.g00008017	http://ghost.zool.kyoto-u.ac.jp/cgi-bin/fordetailkh21.cgi?name=KH.C7.193;source=kh2013
KH.C5.170	LIPI	PNLIP; PNLIPRP1; PNLIPRP2	Cirobu.g00007033	0.117958	1.24072	0.187578	0.915959	0.320506	0	https://www.aniseed.cnrs.fr/aniseed/gene/show_expression?unique_id=Cirobu.g00007033	https://www.aniseed.cnrs.fr/aniseed/gene/show_gene?unique_id=Cirobu.g00007033	http://ghost.zool.kyoto-u.ac.jp/cgi-bin/fordetailkh21.cgi?name=KH.C5.170;source=kh2013
KH.L76.3	SLC7A6	SLC7A11; SLC7A5; SLC7A6	Cirobu.g00013076	0.610158	1.23698	0.354939	-0.380434	0.755845	0	https://www.aniseed.cnrs.fr/aniseed/gene/show_expression?unique_id=Cirobu.g00013076	https://www.aniseed.cnrs.fr/aniseed/gene/show_gene?unique_id=Cirobu.g00013076	http://ghost.zool.kyoto-u.ac.jp/cgi-bin/fordetailkh21.cgi?name=KH.L76.3;source=kh2013
KH.C9.573	RNF121	RNF121; RNF175; SYVN1	Cirobu.g00010132	4.38697	1.23621	0.00688071	-0.500818	0.270785	0	https://www.aniseed.cnrs.fr/aniseed/gene/show_expression?unique_id=Cirobu.g00010132	https://www.aniseed.cnrs.fr/aniseed/gene/show_gene?unique_id=Cirobu.g00010132	http://ghost.zool.kyoto-u.ac.jp/cgi-bin/fordetailkh21.cgi?name=KH.C9.573;source=kh2013
KH.C4.214	GPA2	GPHA2	Cirobu.g00006287	2.19385	1.23574	0.182326	0.449801	0.629868	0	https://www.aniseed.cnrs.fr/aniseed/gene/show_expression?unique_id=Cirobu.g00006287	https://www.aniseed.cnrs.fr/aniseed/gene/show_gene?unique_id=Cirobu.g00006287	http://ghost.zool.kyoto-u.ac.jp/cgi-bin/fordetailkh21.cgi?name=KH.C4.214;source=kh2013
KH.C12.571	KH2013:KH.C12.571	KH.C12.571	Cirobu.g00003139	0.306931	1.23377	0.219525	1.24166	0.212174	0	https://www.aniseed.cnrs.fr/aniseed/gene/show_expression?unique_id=Cirobu.g00003139	https://www.aniseed.cnrs.fr/aniseed/gene/show_gene?unique_id=Cirobu.g00003139	http://ghost.zool.kyoto-u.ac.jp/cgi-bin/fordetailkh21.cgi?name=KH.C12.571;source=kh2013
KH.C12.297	UNC13D	BAIAP3; SYT1; UNC13D	Cirobu.g00002838	5.59912	1.23192	0.210235	-0.383937	0.693738	0	https://www.aniseed.cnrs.fr/aniseed/gene/show_expression?unique_id=Cirobu.g00002838	https://www.aniseed.cnrs.fr/aniseed/gene/show_gene?unique_id=Cirobu.g00002838	http://ghost.zool.kyoto-u.ac.jp/cgi-bin/fordetailkh21.cgi?name=KH.C12.297;source=kh2013
KH.C1.970	KH2013:KH.C1.970	KH.C1.970	Cirobu.g00001262	1.97556	1.22951	0.156866	1.54845	0.0756011	0	https://www.aniseed.cnrs.fr/aniseed/gene/show_expression?unique_id=Cirobu.g00001262	https://www.aniseed.cnrs.fr/aniseed/gene/show_gene?unique_id=Cirobu.g00001262	http://ghost.zool.kyoto-u.ac.jp/cgi-bin/fordetailkh21.cgi?name=KH.C1.970;source=kh2013
KH.L134.15	KH2013:KH.L134.15_UNC93A	UNC93A	Cirobu.g00011079	0.348212	1.22903	0.334768	-0.850782	0.490614	0	https://www.aniseed.cnrs.fr/aniseed/gene/show_expression?unique_id=Cirobu.g00011079	https://www.aniseed.cnrs.fr/aniseed/gene/show_gene?unique_id=Cirobu.g00011079	http://ghost.zool.kyoto-u.ac.jp/cgi-bin/fordetailkh21.cgi?name=KH.L134.15;source=kh2013
KH.C9.498	TMEM143	TMEM143	Cirobu.g00010049	5.51375	1.22883	0.0124384	-0.287725	0.561625	0	https://www.aniseed.cnrs.fr/aniseed/gene/show_expression?unique_id=Cirobu.g00010049	https://www.aniseed.cnrs.fr/aniseed/gene/show_gene?unique_id=Cirobu.g00010049	http://ghost.zool.kyoto-u.ac.jp/cgi-bin/fordetailkh21.cgi?name=KH.C9.498;source=kh2013
KH.C7.540	KH2013:KH.C7.540	KH.C7.540	Cirobu.g00008397	4.05183	1.22857	0.0102696	-1.5103	0.00212503	0	https://www.aniseed.cnrs.fr/aniseed/gene/show_expression?unique_id=Cirobu.g00008397	https://www.aniseed.cnrs.fr/aniseed/gene/show_gene?unique_id=Cirobu.g00008397	http://ghost.zool.kyoto-u.ac.jp/cgi-bin/fordetailkh21.cgi?name=KH.C7.540;source=kh2013
KH.C2.33	ZNF385B	ZNF385A; ZNF385B; ZNF385D	Cirobu.g00004518	6.20187	1.22611	0.00157028	-0.364207	0.345223	13	https://www.aniseed.cnrs.fr/aniseed/gene/show_expression?unique_id=Cirobu.g00004518	https://www.aniseed.cnrs.fr/aniseed/gene/show_gene?unique_id=Cirobu.g00004518	http://ghost.zool.kyoto-u.ac.jp/cgi-bin/fordetailkh21.cgi?name=KH.C2.33;source=kh2013
KH.C1.1125	ARRB1/2	ARRB1; ARRB2; SAG	Cirobu.g00000142	6.26943	1.22411	0.00311659	-0.711744	0.0837787	23	https://www.aniseed.cnrs.fr/aniseed/gene/show_expression?unique_id=Cirobu.g00000142	https://www.aniseed.cnrs.fr/aniseed/gene/show_gene?unique_id=Cirobu.g00000142	http://ghost.zool.kyoto-u.ac.jp/cgi-bin/fordetailkh21.cgi?name=KH.C1.1125;source=kh2013
KH.S1411.2	KH2013:KH.S1411.2_CG9867	EOGT; POMGNT2	Cirobu.g00013862	1.20027	1.22389	0.285708	-1.70352	0.150188	0	https://www.aniseed.cnrs.fr/aniseed/gene/show_expression?unique_id=Cirobu.g00013862	https://www.aniseed.cnrs.fr/aniseed/gene/show_gene?unique_id=Cirobu.g00013862	http://ghost.zool.kyoto-u.ac.jp/cgi-bin/fordetailkh21.cgi?name=KH.S1411.2;source=kh2013
KH.C4.570	GLY-3	GALNT12; GALNT4; POC1B-GALNT4	Cirobu.g00006672	2.6541	1.22201	0.412415	0.0931053	0.955292	0	https://www.aniseed.cnrs.fr/aniseed/gene/show_expression?unique_id=Cirobu.g00006672	https://www.aniseed.cnrs.fr/aniseed/gene/show_gene?unique_id=Cirobu.g00006672	http://ghost.zool.kyoto-u.ac.jp/cgi-bin/fordetailkh21.cgi?name=KH.C4.570;source=kh2013
KH.C12.302	MAMDC2/4	MAMDC2; MAMDC4	Cirobu.g00002845	3.32596	1.2218	0.147723	-0.774247	0.3548	1	https://www.aniseed.cnrs.fr/aniseed/gene/show_expression?unique_id=Cirobu.g00002845	https://www.aniseed.cnrs.fr/aniseed/gene/show_gene?unique_id=Cirobu.g00002845	http://ghost.zool.kyoto-u.ac.jp/cgi-bin/fordetailkh21.cgi?name=KH.C12.302;source=kh2013
KH.L134.19	KH2013:KH.L134.19_GPR144	ADGRG7; ADGRL3; ADGRL4	Cirobu.g00011083	2.65834	1.2215	0.292538	0.0249447	0.992765	0	https://www.aniseed.cnrs.fr/aniseed/gene/show_expression?unique_id=Cirobu.g00011083	https://www.aniseed.cnrs.fr/aniseed/gene/show_gene?unique_id=Cirobu.g00011083	http://ghost.zool.kyoto-u.ac.jp/cgi-bin/fordetailkh21.cgi?name=KH.L134.19;source=kh2013
KH.S617.7	KH2013:KH.S617.7	KH.S617.7	Cirobu.g00014828	1.67816	1.22063	0.217688	0.238688	0.821792	0	https://www.aniseed.cnrs.fr/aniseed/gene/show_expression?unique_id=Cirobu.g00014828	https://www.aniseed.cnrs.fr/aniseed/gene/show_gene?unique_id=Cirobu.g00014828	http://ghost.zool.kyoto-u.ac.jp/cgi-bin/fordetailkh21.cgi?name=KH.S617.7;source=kh2013
KH.C1.742	KH2013:KH.C1.742_C6	C6; C7; C9	Cirobu.g00001011	0.644672	1.21933	0.259517	1.36754	0.197942	1	https://www.aniseed.cnrs.fr/aniseed/gene/show_expression?unique_id=Cirobu.g00001011	https://www.aniseed.cnrs.fr/aniseed/gene/show_gene?unique_id=Cirobu.g00001011	http://ghost.zool.kyoto-u.ac.jp/cgi-bin/fordetailkh21.cgi?name=KH.C1.742;source=kh2013
KH.C6.163	KH2013:KH.C6.163_FLRT1/2/3	FLRT1; FLRT2; FLRT3	Cirobu.g00007684	6.01883	1.21929	0.00438059	-0.436953	0.306701	0	https://www.aniseed.cnrs.fr/aniseed/gene/show_expression?unique_id=Cirobu.g00007684	https://www.aniseed.cnrs.fr/aniseed/gene/show_gene?unique_id=Cirobu.g00007684	http://ghost.zool.kyoto-u.ac.jp/cgi-bin/fordetailkh21.cgi?name=KH.C6.163;source=kh2013
KH.C5.200	NACP60E	SCN11A; SCN7A; SCN9A	Cirobu.g00007067	6.25021	1.2175	0.0130854	-0.339616	0.484459	0	https://www.aniseed.cnrs.fr/aniseed/gene/show_expression?unique_id=Cirobu.g00007067	https://www.aniseed.cnrs.fr/aniseed/gene/show_gene?unique_id=Cirobu.g00007067	http://ghost.zool.kyoto-u.ac.jp/cgi-bin/fordetailkh21.cgi?name=KH.C5.200;source=kh2013
KH.C7.544	KH2013:KH.C7.544_QDR1/2/3	SLC22A1; SLC22A4; SLC22A5	Cirobu.g00008401	0.290097	1.21626	0.300791	1.21526	0.29325	0	https://www.aniseed.cnrs.fr/aniseed/gene/show_expression?unique_id=Cirobu.g00008401	https://www.aniseed.cnrs.fr/aniseed/gene/show_gene?unique_id=Cirobu.g00008401	http://ghost.zool.kyoto-u.ac.jp/cgi-bin/fordetailkh21.cgi?name=KH.C7.544;source=kh2013
KH.C14.421	LAMA2	KH.C14.421	Cirobu.g00003854	2.53727	1.21558	0.0966902	-0.447188	0.533696	0	https://www.aniseed.cnrs.fr/aniseed/gene/show_expression?unique_id=Cirobu.g00003854	https://www.aniseed.cnrs.fr/aniseed/gene/show_gene?unique_id=Cirobu.g00003854	http://ghost.zool.kyoto-u.ac.jp/cgi-bin/fordetailkh21.cgi?name=KH.C14.421;source=kh2013
KH.C3.616	KH2013:KH.C3.616_GNRHR/1/2/4	AVPR1A; GNRHR; NPSR1	Cirobu.g00005810	1.85334	1.21368	0.257902	-1.15738	0.277612	11	https://www.aniseed.cnrs.fr/aniseed/gene/show_expression?unique_id=Cirobu.g00005810	https://www.aniseed.cnrs.fr/aniseed/gene/show_gene?unique_id=Cirobu.g00005810	http://ghost.zool.kyoto-u.ac.jp/cgi-bin/fordetailkh21.cgi?name=KH.C3.616;source=kh2013
KH.C3.416	CRIM1	CRIM1; FRAS1; KCP	Cirobu.g00005595	4.63123	1.21253	0.0334886	-1.0398	0.0692284	0	https://www.aniseed.cnrs.fr/aniseed/gene/show_expression?unique_id=Cirobu.g00005595	https://www.aniseed.cnrs.fr/aniseed/gene/show_gene?unique_id=Cirobu.g00005595	http://ghost.zool.kyoto-u.ac.jp/cgi-bin/fordetailkh21.cgi?name=KH.C3.416;source=kh2013
KH.C14.274	VAMP7	SEC22B; VAMP4; VAMP7	Cirobu.g00003696	4.78284	1.21169	0.0131916	-0.310971	0.521195	0	https://www.aniseed.cnrs.fr/aniseed/gene/show_expression?unique_id=Cirobu.g00003696	https://www.aniseed.cnrs.fr/aniseed/gene/show_gene?unique_id=Cirobu.g00003696	http://ghost.zool.kyoto-u.ac.jp/cgi-bin/fordetailkh21.cgi?name=KH.C14.274;source=kh2013
KH.C1.409	UBA1/6	UBA1; UBA6; UBA7	Cirobu.g00000647	6.71414	1.21153	0.00235643	-0.351985	0.374356	0	https://www.aniseed.cnrs.fr/aniseed/gene/show_expression?unique_id=Cirobu.g00000647	https://www.aniseed.cnrs.fr/aniseed/gene/show_gene?unique_id=Cirobu.g00000647	http://ghost.zool.kyoto-u.ac.jp/cgi-bin/fordetailkh21.cgi?name=KH.C1.409;source=kh2013
KH.C10.6	HTR2B	ADORA1; ADORA2A; ADORA2B	Cirobu.g00001833	2.06425	1.20702	0.302638	-2.02454	0.0904891	0	https://www.aniseed.cnrs.fr/aniseed/gene/show_expression?unique_id=Cirobu.g00001833	https://www.aniseed.cnrs.fr/aniseed/gene/show_gene?unique_id=Cirobu.g00001833	http://ghost.zool.kyoto-u.ac.jp/cgi-bin/fordetailkh21.cgi?name=KH.C10.6;source=kh2013
KH.C9.711	PIP5KL1	PIP5K1A; PIP5K1B; PIP5KL1	Cirobu.g00010285	4.55971	1.20607	0.00907754	-0.715585	0.125645	0	https://www.aniseed.cnrs.fr/aniseed/gene/show_expression?unique_id=Cirobu.g00010285	https://www.aniseed.cnrs.fr/aniseed/gene/show_gene?unique_id=Cirobu.g00010285	http://ghost.zool.kyoto-u.ac.jp/cgi-bin/fordetailkh21.cgi?name=KH.C9.711;source=kh2013
KH.C4.811	UNC119B	PDE6D; UNC119; UNC119B	Cirobu.g00006937	6.73312	1.20549	0.006419	-0.290572	0.506821	3	https://www.aniseed.cnrs.fr/aniseed/gene/show_expression?unique_id=Cirobu.g00006937	https://www.aniseed.cnrs.fr/aniseed/gene/show_gene?unique_id=Cirobu.g00006937	http://ghost.zool.kyoto-u.ac.jp/cgi-bin/fordetailkh21.cgi?name=KH.C4.811;source=kh2013
KH.C12.141	KH2013:KH.C12.141_CSTF1	CSTF1; PRPF4; WDR88	Cirobu.g00002668	3.86179	1.20312	0.0131422	-0.446682	0.356139	0	https://www.aniseed.cnrs.fr/aniseed/gene/show_expression?unique_id=Cirobu.g00002668	https://www.aniseed.cnrs.fr/aniseed/gene/show_gene?unique_id=Cirobu.g00002668	http://ghost.zool.kyoto-u.ac.jp/cgi-bin/fordetailkh21.cgi?name=KH.C12.141;source=kh2013
KH.C2.917	HOXA5/6/7	GSX1; GSX2; HOXA3	Cirobu.g00005160	3.79541	1.2001	0.146029	-0.578458	0.480202	27	https://www.aniseed.cnrs.fr/aniseed/gene/show_expression?unique_id=Cirobu.g00005160	https://www.aniseed.cnrs.fr/aniseed/gene/show_gene?unique_id=Cirobu.g00005160	http://ghost.zool.kyoto-u.ac.jp/cgi-bin/fordetailkh21.cgi?name=KH.C2.917;source=kh2013
KH.L84.4	FAM72B	FAM72B; FAM72C; FAM72D	Cirobu.g00013161	4.45322	1.19969	0.0201587	-0.597828	0.243783	0	https://www.aniseed.cnrs.fr/aniseed/gene/show_expression?unique_id=Cirobu.g00013161	https://www.aniseed.cnrs.fr/aniseed/gene/show_gene?unique_id=Cirobu.g00013161	http://ghost.zool.kyoto-u.ac.jp/cgi-bin/fordetailkh21.cgi?name=KH.L84.4;source=kh2013
KH.S115.6	MORN2	MORN2; MORN4; RSPH1	Cirobu.g00013664	1.83932	1.19915	0.0602196	-0.598807	0.374453	0	https://www.aniseed.cnrs.fr/aniseed/gene/show_expression?unique_id=Cirobu.g00013664	https://www.aniseed.cnrs.fr/aniseed/gene/show_gene?unique_id=Cirobu.g00013664	http://ghost.zool.kyoto-u.ac.jp/cgi-bin/fordetailkh21.cgi?name=KH.S115.6;source=kh2013
KH.C3.293	CUL2/3	CUL1; CUL2; CUL3	Cirobu.g00005462	4.00622	1.19853	0.0102879	0.324975	0.491821	0	https://www.aniseed.cnrs.fr/aniseed/gene/show_expression?unique_id=Cirobu.g00005462	https://www.aniseed.cnrs.fr/aniseed/gene/show_gene?unique_id=Cirobu.g00005462	http://ghost.zool.kyoto-u.ac.jp/cgi-bin/fordetailkh21.cgi?name=KH.C3.293;source=kh2013
KH.C6.36	DYRK2/3/4	DYRK2; DYRK3; DYRK4	Cirobu.g00007848	1.90418	1.19781	0.277591	-0.280271	0.798372	0	https://www.aniseed.cnrs.fr/aniseed/gene/show_expression?unique_id=Cirobu.g00007848	https://www.aniseed.cnrs.fr/aniseed/gene/show_gene?unique_id=Cirobu.g00007848	http://ghost.zool.kyoto-u.ac.jp/cgi-bin/fordetailkh21.cgi?name=KH.C6.36;source=kh2013
KH.C4.281	KH2013:KH.C4.281	KH.C4.281	Cirobu.g00006359	3.59616	1.19753	0.0636834	-0.722933	0.259902	0	https://www.aniseed.cnrs.fr/aniseed/gene/show_expression?unique_id=Cirobu.g00006359	https://www.aniseed.cnrs.fr/aniseed/gene/show_gene?unique_id=Cirobu.g00006359	http://ghost.zool.kyoto-u.ac.jp/cgi-bin/fordetailkh21.cgi?name=KH.C4.281;source=kh2013
KH.C4.42	CAPN1/11/2/3/8/9	CAPN1; CAPN3; CAPN9	Cirobu.g00006509	5.92317	1.19673	0.00131088	-0.154328	0.676587	0	https://www.aniseed.cnrs.fr/aniseed/gene/show_expression?unique_id=Cirobu.g00006509	https://www.aniseed.cnrs.fr/aniseed/gene/show_gene?unique_id=Cirobu.g00006509	http://ghost.zool.kyoto-u.ac.jp/cgi-bin/fordetailkh21.cgi?name=KH.C4.42;source=kh2013
KH.L168.2	DGKB	DGKA; DGKB; DGKG	Cirobu.g00011715	6.28858	1.19536	0.00256451	-0.265419	0.499807	0	https://www.aniseed.cnrs.fr/aniseed/gene/show_expression?unique_id=Cirobu.g00011715	https://www.aniseed.cnrs.fr/aniseed/gene/show_gene?unique_id=Cirobu.g00011715	http://ghost.zool.kyoto-u.ac.jp/cgi-bin/fordetailkh21.cgi?name=KH.L168.2;source=kh2013
KH.S1094.1	KH2013:KH.S1094.1	KH.S1094.1	Cirobu.g00013579	0.559921	1.19329	0.355988	0.285846	0.858975	0	https://www.aniseed.cnrs.fr/aniseed/gene/show_expression?unique_id=Cirobu.g00013579	https://www.aniseed.cnrs.fr/aniseed/gene/show_gene?unique_id=Cirobu.g00013579	http://ghost.zool.kyoto-u.ac.jp/cgi-bin/fordetailkh21.cgi?name=KH.S1094.1;source=kh2013
KH.C9.103	SLC16A12/7	SLC16A12; SLC16A14; SLC16A7	Cirobu.g00009617	5.71048	1.19194	0.0040053	-0.855854	0.0400826	0	https://www.aniseed.cnrs.fr/aniseed/gene/show_expression?unique_id=Cirobu.g00009617	https://www.aniseed.cnrs.fr/aniseed/gene/show_gene?unique_id=Cirobu.g00009617	http://ghost.zool.kyoto-u.ac.jp/cgi-bin/fordetailkh21.cgi?name=KH.C9.103;source=kh2013
KH.S1042.2	CG17717	MARCH1; MARCH8	Cirobu.g00013535	4.22686	1.18381	0.0815609	-0.851905	0.20561	0	https://www.aniseed.cnrs.fr/aniseed/gene/show_expression?unique_id=Cirobu.g00013535	https://www.aniseed.cnrs.fr/aniseed/gene/show_gene?unique_id=Cirobu.g00013535	http://ghost.zool.kyoto-u.ac.jp/cgi-bin/fordetailkh21.cgi?name=KH.S1042.2;source=kh2013
KH.C1.301	HOMER/1/2/3	HOMER1; HOMER2; HOMER3	Cirobu.g00000528	4.41683	1.18381	0.00682345	-0.217999	0.618895	0	https://www.aniseed.cnrs.fr/aniseed/gene/show_expression?unique_id=Cirobu.g00000528	https://www.aniseed.cnrs.fr/aniseed/gene/show_gene?unique_id=Cirobu.g00000528	http://ghost.zool.kyoto-u.ac.jp/cgi-bin/fordetailkh21.cgi?name=KH.C1.301;source=kh2013
KH.S781.9	GALNT4/6	GALNT4; GALNT6; POC1B-GALNT4	Cirobu.g00015058	2.70978	1.18043	0.238864	-0.0615155	0.951893	0	https://www.aniseed.cnrs.fr/aniseed/gene/show_expression?unique_id=Cirobu.g00015058	https://www.aniseed.cnrs.fr/aniseed/gene/show_gene?unique_id=Cirobu.g00015058	http://ghost.zool.kyoto-u.ac.jp/cgi-bin/fordetailkh21.cgi?name=KH.S781.9;source=kh2013
KH.C11.415	PP2D1	PP2D1; PPM1J; PPM1K	Cirobu.g00002247	0.125549	1.18025	0.37057	0.269124	0.923198	0	https://www.aniseed.cnrs.fr/aniseed/gene/show_expression?unique_id=Cirobu.g00002247	https://www.aniseed.cnrs.fr/aniseed/gene/show_gene?unique_id=Cirobu.g00002247	http://ghost.zool.kyoto-u.ac.jp/cgi-bin/fordetailkh21.cgi?name=KH.C11.415;source=kh2013
KH.C1.1153	KH2013:KH.C1.1153	KH.C1.1153	Cirobu.g00000172	1.75732	1.1794	0.116129	0.386523	0.596005	0	https://www.aniseed.cnrs.fr/aniseed/gene/show_expression?unique_id=Cirobu.g00000172	https://www.aniseed.cnrs.fr/aniseed/gene/show_gene?unique_id=Cirobu.g00000172	http://ghost.zool.kyoto-u.ac.jp/cgi-bin/fordetailkh21.cgi?name=KH.C1.1153;source=kh2013
KH.L68.2	KH2013:KH.L68.2	STMN1; STMN2; STMN3	Cirobu.g00012957	3.28215	1.17921	0.0366259	-1.1365	0.0481446	0	https://www.aniseed.cnrs.fr/aniseed/gene/show_expression?unique_id=Cirobu.g00012957	https://www.aniseed.cnrs.fr/aniseed/gene/show_gene?unique_id=Cirobu.g00012957	http://ghost.zool.kyoto-u.ac.jp/cgi-bin/fordetailkh21.cgi?name=KH.L68.2;source=kh2013
KH.C5.368	KH2013:KH.C5.368	KH.C5.368	Cirobu.g00007244	0.660055	1.17877	0.141388	0.111207	0.957368	0	https://www.aniseed.cnrs.fr/aniseed/gene/show_expression?unique_id=Cirobu.g00007244	https://www.aniseed.cnrs.fr/aniseed/gene/show_gene?unique_id=Cirobu.g00007244	http://ghost.zool.kyoto-u.ac.jp/cgi-bin/fordetailkh21.cgi?name=KH.C5.368;source=kh2013
KH.L42.10	KH2013:KH.L42.10	KH.L42.10	Cirobu.g00012635	0.342472	1.17523	0.139579	0.282023	0.797971	0	https://www.aniseed.cnrs.fr/aniseed/gene/show_expression?unique_id=Cirobu.g00012635	https://www.aniseed.cnrs.fr/aniseed/gene/show_gene?unique_id=Cirobu.g00012635	http://ghost.zool.kyoto-u.ac.jp/cgi-bin/fordetailkh21.cgi?name=KH.L42.10;source=kh2013
KH.S346.9	KH2013:KH.S346.9	KH.S346.9	Cirobu.g00014347	1.78221	1.17372	0.136302	-0.343879	0.681662	0	https://www.aniseed.cnrs.fr/aniseed/gene/show_expression?unique_id=Cirobu.g00014347	https://www.aniseed.cnrs.fr/aniseed/gene/show_gene?unique_id=Cirobu.g00014347	http://ghost.zool.kyoto-u.ac.jp/cgi-bin/fordetailkh21.cgi?name=KH.S346.9;source=kh2013
KH.C4.394	TRAF4	TRAF2; TRAF4; TRAF6	Cirobu.g00006481	7.39934	1.17016	0.00383554	0.153941	0.701908	18	https://www.aniseed.cnrs.fr/aniseed/gene/show_expression?unique_id=Cirobu.g00006481	https://www.aniseed.cnrs.fr/aniseed/gene/show_gene?unique_id=Cirobu.g00006481	http://ghost.zool.kyoto-u.ac.jp/cgi-bin/fordetailkh21.cgi?name=KH.C4.394;source=kh2013
KH.C14.416	MAPK10/8/9	MAPK10; MAPK8; MAPK9	Cirobu.g00003848	7.11873	1.17011	0.0171223	-0.0660939	0.892015	11	https://www.aniseed.cnrs.fr/aniseed/gene/show_expression?unique_id=Cirobu.g00003848	https://www.aniseed.cnrs.fr/aniseed/gene/show_gene?unique_id=Cirobu.g00003848	http://ghost.zool.kyoto-u.ac.jp/cgi-bin/fordetailkh21.cgi?name=KH.C14.416;source=kh2013
KH.C1.473	KH2013:KH.C1.473	KH.C1.473	Cirobu.g00000716	3.75175	1.16852	0.0211189	0.1176	0.812827	0	https://www.aniseed.cnrs.fr/aniseed/gene/show_expression?unique_id=Cirobu.g00000716	https://www.aniseed.cnrs.fr/aniseed/gene/show_gene?unique_id=Cirobu.g00000716	http://ghost.zool.kyoto-u.ac.jp/cgi-bin/fordetailkh21.cgi?name=KH.C1.473;source=kh2013
KH.C3.45	PRKCA	PRKCA; PRKCB; PRKCG	Cirobu.g00005631	7.00882	1.16752	0.00463776	-0.234259	0.567168	0	https://www.aniseed.cnrs.fr/aniseed/gene/show_expression?unique_id=Cirobu.g00005631	https://www.aniseed.cnrs.fr/aniseed/gene/show_gene?unique_id=Cirobu.g00005631	http://ghost.zool.kyoto-u.ac.jp/cgi-bin/fordetailkh21.cgi?name=KH.C3.45;source=kh2013
KH.L47.2	KH2013:KH.L47.2	KH.L47.2	Cirobu.g00012695	-0.113342	1.16729	0.406877	-0.605028	0.641566	0	https://www.aniseed.cnrs.fr/aniseed/gene/show_expression?unique_id=Cirobu.g00012695	https://www.aniseed.cnrs.fr/aniseed/gene/show_gene?unique_id=Cirobu.g00012695	http://ghost.zool.kyoto-u.ac.jp/cgi-bin/fordetailkh21.cgi?name=KH.L47.2;source=kh2013
KH.C12.686	KH2013:KH.C12.686	KH.C12.686	Cirobu.g00003265	2.86305	1.16524	0.0986357	0.12206	0.864067	0	https://www.aniseed.cnrs.fr/aniseed/gene/show_expression?unique_id=Cirobu.g00003265	https://www.aniseed.cnrs.fr/aniseed/gene/show_gene?unique_id=Cirobu.g00003265	http://ghost.zool.kyoto-u.ac.jp/cgi-bin/fordetailkh21.cgi?name=KH.C12.686;source=kh2013
KH.C7.584	TLR5	IGFALS; LINGO4; LRIG2	Cirobu.g00008444	2.18023	1.16325	0.106262	-0.449032	0.533842	0	https://www.aniseed.cnrs.fr/aniseed/gene/show_expression?unique_id=Cirobu.g00008444	https://www.aniseed.cnrs.fr/aniseed/gene/show_gene?unique_id=Cirobu.g00008444	http://ghost.zool.kyoto-u.ac.jp/cgi-bin/fordetailkh21.cgi?name=KH.C7.584;source=kh2013
KH.C8.372	KH2013:KH.C8.372_ASAH2	ASAH2; ASAH2B	Cirobu.g00008999	6.59217	1.16266	0.0113367	-0.709409	0.120286	0	https://www.aniseed.cnrs.fr/aniseed/gene/show_expression?unique_id=Cirobu.g00008999	https://www.aniseed.cnrs.fr/aniseed/gene/show_gene?unique_id=Cirobu.g00008999	http://ghost.zool.kyoto-u.ac.jp/cgi-bin/fordetailkh21.cgi?name=KH.C8.372;source=kh2013
KH.L96.53	KH2013:KH.L96.53	KH.L96.53	Cirobu.g00013398	0.745818	1.15991	0.489362	1.64138	0.320423	0	https://www.aniseed.cnrs.fr/aniseed/gene/show_expression?unique_id=Cirobu.g00013398	https://www.aniseed.cnrs.fr/aniseed/gene/show_gene?unique_id=Cirobu.g00013398	http://ghost.zool.kyoto-u.ac.jp/cgi-bin/fordetailkh21.cgi?name=KH.L96.53;source=kh2013
KH.C2.673	GLRX-10	GLRX; GLRX2; TXNRD3	Cirobu.g00004895	4.22849	1.15904	0.015606	0.0850261	0.872919	6	https://www.aniseed.cnrs.fr/aniseed/gene/show_expression?unique_id=Cirobu.g00004895	https://www.aniseed.cnrs.fr/aniseed/gene/show_gene?unique_id=Cirobu.g00004895	http://ghost.zool.kyoto-u.ac.jp/cgi-bin/fordetailkh21.cgi?name=KH.C2.673;source=kh2013
KH.C5.427	CHTF8	KH.C5.427	Cirobu.g00007310	2.73849	1.15834	0.0239161	0.720788	0.166352	0	https://www.aniseed.cnrs.fr/aniseed/gene/show_expression?unique_id=Cirobu.g00007310	https://www.aniseed.cnrs.fr/aniseed/gene/show_gene?unique_id=Cirobu.g00007310	http://ghost.zool.kyoto-u.ac.jp/cgi-bin/fordetailkh21.cgi?name=KH.C5.427;source=kh2013
KH.C1.507	KH2013:KH.C1.507_XKR4/6/7	XKR4; XKR6; XKR7	Cirobu.g00000753	4.70033	1.15812	0.00477247	-0.246756	0.553059	0	https://www.aniseed.cnrs.fr/aniseed/gene/show_expression?unique_id=Cirobu.g00000753	https://www.aniseed.cnrs.fr/aniseed/gene/show_gene?unique_id=Cirobu.g00000753	http://ghost.zool.kyoto-u.ac.jp/cgi-bin/fordetailkh21.cgi?name=KH.C1.507;source=kh2013
KH.L141.25	ZSCAN29	ZSCAN20; ZSCAN29	Cirobu.g00011178	3.71135	1.15495	0.00986228	0.180692	0.707147	0	https://www.aniseed.cnrs.fr/aniseed/gene/show_expression?unique_id=Cirobu.g00011178	https://www.aniseed.cnrs.fr/aniseed/gene/show_gene?unique_id=Cirobu.g00011178	http://ghost.zool.kyoto-u.ac.jp/cgi-bin/fordetailkh21.cgi?name=KH.L141.25;source=kh2013
KH.C12.176	CYP1A/1/2	CYP1A1; CYP1A2; CYP1B1	Cirobu.g00002706	2.96375	1.15396	0.0970167	-0.127902	0.866329	4	https://www.aniseed.cnrs.fr/aniseed/gene/show_expression?unique_id=Cirobu.g00002706	https://www.aniseed.cnrs.fr/aniseed/gene/show_gene?unique_id=Cirobu.g00002706	http://ghost.zool.kyoto-u.ac.jp/cgi-bin/fordetailkh21.cgi?name=KH.C12.176;source=kh2013
KH.L96.41	KH2013:KH.L96.41_AMPD2/3	AMPD1; AMPD2; AMPD3	Cirobu.g00013385	6.61807	1.15393	0.00154806	-0.303971	0.400667	1	https://www.aniseed.cnrs.fr/aniseed/gene/show_expression?unique_id=Cirobu.g00013385	https://www.aniseed.cnrs.fr/aniseed/gene/show_gene?unique_id=Cirobu.g00013385	http://ghost.zool.kyoto-u.ac.jp/cgi-bin/fordetailkh21.cgi?name=KH.L96.41;source=kh2013
KH.C1.464	F40F8.5	KH.C1.464	Cirobu.g00000706	2.9166	1.15363	0.187078	0.255107	0.779786	1	https://www.aniseed.cnrs.fr/aniseed/gene/show_expression?unique_id=Cirobu.g00000706	https://www.aniseed.cnrs.fr/aniseed/gene/show_gene?unique_id=Cirobu.g00000706	http://ghost.zool.kyoto-u.ac.jp/cgi-bin/fordetailkh21.cgi?name=KH.C1.464;source=kh2013
KH.S1066.4	KH2013:KH.S1066.4	KH.S1066.4	Cirobu.g00013562	1.6444	1.15325	0.132659	0.059638	0.957332	4	https://www.aniseed.cnrs.fr/aniseed/gene/show_expression?unique_id=Cirobu.g00013562	https://www.aniseed.cnrs.fr/aniseed/gene/show_gene?unique_id=Cirobu.g00013562	http://ghost.zool.kyoto-u.ac.jp/cgi-bin/fordetailkh21.cgi?name=KH.S1066.4;source=kh2013
KH.S1666.1	KH2013:KH.S1666.1_Y20F4.8	KH.S1666.1	Cirobu.g00014028	1.1251	1.15318	0.190502	-0.47176	0.596909	0	https://www.aniseed.cnrs.fr/aniseed/gene/show_expression?unique_id=Cirobu.g00014028	https://www.aniseed.cnrs.fr/aniseed/gene/show_gene?unique_id=Cirobu.g00014028	http://ghost.zool.kyoto-u.ac.jp/cgi-bin/fordetailkh21.cgi?name=KH.S1666.1;source=kh2013
KH.C7.530	ZGC:101765	AKR1B10; AKR1C4; AKR1D1	Cirobu.g00008386	0.586715	1.15161	0.196737	0.60889	0.521298	0	https://www.aniseed.cnrs.fr/aniseed/gene/show_expression?unique_id=Cirobu.g00008386	https://www.aniseed.cnrs.fr/aniseed/gene/show_gene?unique_id=Cirobu.g00008386	http://ghost.zool.kyoto-u.ac.jp/cgi-bin/fordetailkh21.cgi?name=KH.C7.530;source=kh2013
KH.C8.146	KH2013:KH.C8.146	KH.C8.146	Cirobu.g00008753	3.84084	1.15075	0.0474117	-0.297359	0.606285	0	https://www.aniseed.cnrs.fr/aniseed/gene/show_expression?unique_id=Cirobu.g00008753	https://www.aniseed.cnrs.fr/aniseed/gene/show_gene?unique_id=Cirobu.g00008753	http://ghost.zool.kyoto-u.ac.jp/cgi-bin/fordetailkh21.cgi?name=KH.C8.146;source=kh2013
KH.L140.2	KAZN	KAZN; PPFIA1; PPFIA3	Cirobu.g00011154	6.81441	1.14902	0.000903884	-0.544291	0.114151	0	https://www.aniseed.cnrs.fr/aniseed/gene/show_expression?unique_id=Cirobu.g00011154	https://www.aniseed.cnrs.fr/aniseed/gene/show_gene?unique_id=Cirobu.g00011154	http://ghost.zool.kyoto-u.ac.jp/cgi-bin/fordetailkh21.cgi?name=KH.L140.2;source=kh2013
KH.L96.61	KH2013:KH.L96.61	KH.L96.61	Cirobu.g00013407	1.83825	1.1482	0.187956	0.778535	0.381899	0	https://www.aniseed.cnrs.fr/aniseed/gene/show_expression?unique_id=Cirobu.g00013407	https://www.aniseed.cnrs.fr/aniseed/gene/show_gene?unique_id=Cirobu.g00013407	http://ghost.zool.kyoto-u.ac.jp/cgi-bin/fordetailkh21.cgi?name=KH.L96.61;source=kh2013
KH.L153.62	PEAR1	MEGF10; MEGF11; MEGF6	Cirobu.g00011510	2.08277	1.1463	0.106473	0.376134	0.614327	0	https://www.aniseed.cnrs.fr/aniseed/gene/show_expression?unique_id=Cirobu.g00011510	https://www.aniseed.cnrs.fr/aniseed/gene/show_gene?unique_id=Cirobu.g00011510	http://ghost.zool.kyoto-u.ac.jp/cgi-bin/fordetailkh21.cgi?name=KH.L153.62;source=kh2013
KH.L96.50	KH2013:KH.L96.50_TLE1/2/3/4	TLE1; TLE3; TLE4	Cirobu.g00013395	5.27458	1.14452	0.000846399	-0.456712	0.186437	10	https://www.aniseed.cnrs.fr/aniseed/gene/show_expression?unique_id=Cirobu.g00013395	https://www.aniseed.cnrs.fr/aniseed/gene/show_gene?unique_id=Cirobu.g00013395	http://ghost.zool.kyoto-u.ac.jp/cgi-bin/fordetailkh21.cgi?name=KH.L96.50;source=kh2013
KH.C2.923	TSSC1	EIPR1; RBBP4; RBBP7	Cirobu.g00005167	3.40055	1.14397	0.0417116	-0.32512	0.56428	0	https://www.aniseed.cnrs.fr/aniseed/gene/show_expression?unique_id=Cirobu.g00005167	https://www.aniseed.cnrs.fr/aniseed/gene/show_gene?unique_id=Cirobu.g00005167	http://ghost.zool.kyoto-u.ac.jp/cgi-bin/fordetailkh21.cgi?name=KH.C2.923;source=kh2013
KH.C4.185	KH2013:KH.C4.185	KH.C4.185	Cirobu.g00006255	1.2901	1.14375	0.301	2.03225	0.0678345	0	https://www.aniseed.cnrs.fr/aniseed/gene/show_expression?unique_id=Cirobu.g00006255	https://www.aniseed.cnrs.fr/aniseed/gene/show_gene?unique_id=Cirobu.g00006255	http://ghost.zool.kyoto-u.ac.jp/cgi-bin/fordetailkh21.cgi?name=KH.C4.185;source=kh2013
KH.C12.542	KH2013:KH.C12.542_AGPHD1	HYKK	Cirobu.g00003107	0.938684	1.14313	0.343924	0.40423	0.763432	0	https://www.aniseed.cnrs.fr/aniseed/gene/show_expression?unique_id=Cirobu.g00003107	https://www.aniseed.cnrs.fr/aniseed/gene/show_gene?unique_id=Cirobu.g00003107	http://ghost.zool.kyoto-u.ac.jp/cgi-bin/fordetailkh21.cgi?name=KH.C12.542;source=kh2013
KH.C3.847	KH2013:KH.C3.847	KH.C3.847	Cirobu.g00006057	0.681523	1.14071	0.460959	-1.11471	0.493051	0	https://www.aniseed.cnrs.fr/aniseed/gene/show_expression?unique_id=Cirobu.g00006057	https://www.aniseed.cnrs.fr/aniseed/gene/show_gene?unique_id=Cirobu.g00006057	http://ghost.zool.kyoto-u.ac.jp/cgi-bin/fordetailkh21.cgi?name=KH.C3.847;source=kh2013
KH.C8.444	PLEKHG7	PLEKHG5; PLEKHG6; PLEKHG7	Cirobu.g00009079	2.68429	1.14045	0.0476307	0.0977263	0.880227	0	https://www.aniseed.cnrs.fr/aniseed/gene/show_expression?unique_id=Cirobu.g00009079	https://www.aniseed.cnrs.fr/aniseed/gene/show_gene?unique_id=Cirobu.g00009079	http://ghost.zool.kyoto-u.ac.jp/cgi-bin/fordetailkh21.cgi?name=KH.C8.444;source=kh2013
KH.S424.4	KH2013:KH.S424.4	KH.S424.4	Cirobu.g00014487	0.366207	1.14041	0.446927	-0.650978	0.686754	0	https://www.aniseed.cnrs.fr/aniseed/gene/show_expression?unique_id=Cirobu.g00014487	https://www.aniseed.cnrs.fr/aniseed/gene/show_gene?unique_id=Cirobu.g00014487	http://ghost.zool.kyoto-u.ac.jp/cgi-bin/fordetailkh21.cgi?name=KH.S424.4;source=kh2013
KH.C10.17	KH2013:KH.C10.17	SEMA6A; SEMA6C; SEMA6D	Cirobu.g00001368	6.25755	1.13954	0.00241476	-0.411983	0.269931	7	https://www.aniseed.cnrs.fr/aniseed/gene/show_expression?unique_id=Cirobu.g00001368	https://www.aniseed.cnrs.fr/aniseed/gene/show_gene?unique_id=Cirobu.g00001368	http://ghost.zool.kyoto-u.ac.jp/cgi-bin/fordetailkh21.cgi?name=KH.C10.17;source=kh2013
KH.L51.8	KH2013:KH.L51.8	KH.L51.8	Cirobu.g00012755	3.76004	1.13904	0.0377949	-0.676981	0.228073	0	https://www.aniseed.cnrs.fr/aniseed/gene/show_expression?unique_id=Cirobu.g00012755	https://www.aniseed.cnrs.fr/aniseed/gene/show_gene?unique_id=Cirobu.g00012755	http://ghost.zool.kyoto-u.ac.jp/cgi-bin/fordetailkh21.cgi?name=KH.L51.8;source=kh2013
KH.C7.62	DRD1	DRD1; DRD5; GPR119	Cirobu.g00008484	5.5381	1.13781	0.00373898	0.263646	0.498166	0	https://www.aniseed.cnrs.fr/aniseed/gene/show_expression?unique_id=Cirobu.g00008484	https://www.aniseed.cnrs.fr/aniseed/gene/show_gene?unique_id=Cirobu.g00008484	http://ghost.zool.kyoto-u.ac.jp/cgi-bin/fordetailkh21.cgi?name=KH.C7.62;source=kh2013
KH.C8.852	KH2013:KH.C8.852_ADRB1/2/3	ADRB1; ADRB2; ADRB3	Cirobu.g00009527	2.47975	1.13718	0.255162	0.638737	0.526728	4	https://www.aniseed.cnrs.fr/aniseed/gene/show_expression?unique_id=Cirobu.g00009527	https://www.aniseed.cnrs.fr/aniseed/gene/show_gene?unique_id=Cirobu.g00009527	http://ghost.zool.kyoto-u.ac.jp/cgi-bin/fordetailkh21.cgi?name=KH.C8.852;source=kh2013
KH.S1945.1	CG1600	KH.S1945.1	Cirobu.g00014142	0.686373	1.1371	0.45843	0.23432	0.912514	0	https://www.aniseed.cnrs.fr/aniseed/gene/show_expression?unique_id=Cirobu.g00014142	https://www.aniseed.cnrs.fr/aniseed/gene/show_gene?unique_id=Cirobu.g00014142	http://ghost.zool.kyoto-u.ac.jp/cgi-bin/fordetailkh21.cgi?name=KH.S1945.1;source=kh2013
KH.C1.358	SH3GLB1/2	SH3GL1; SH3GLB1; SH3GLB2	Cirobu.g00000590	6.64906	1.13433	0.00266861	-0.199835	0.596943	2	https://www.aniseed.cnrs.fr/aniseed/gene/show_expression?unique_id=Cirobu.g00000590	https://www.aniseed.cnrs.fr/aniseed/gene/show_gene?unique_id=Cirobu.g00000590	http://ghost.zool.kyoto-u.ac.jp/cgi-bin/fordetailkh21.cgi?name=KH.C1.358;source=kh2013
KH.C3.911	KH2013:KH.C3.911	KH.C3.911	Cirobu.g00006127	2.02644	1.13056	0.432356	-0.897171	0.525893	0	https://www.aniseed.cnrs.fr/aniseed/gene/show_expression?unique_id=Cirobu.g00006127	https://www.aniseed.cnrs.fr/aniseed/gene/show_gene?unique_id=Cirobu.g00006127	http://ghost.zool.kyoto-u.ac.jp/cgi-bin/fordetailkh21.cgi?name=KH.C3.911;source=kh2013
KH.C1.710	FAM49A	FAM49A; FAM49B	Cirobu.g00000976	5.79737	1.13023	0.0160986	-0.435539	0.350319	0	https://www.aniseed.cnrs.fr/aniseed/gene/show_expression?unique_id=Cirobu.g00000976	https://www.aniseed.cnrs.fr/aniseed/gene/show_gene?unique_id=Cirobu.g00000976	http://ghost.zool.kyoto-u.ac.jp/cgi-bin/fordetailkh21.cgi?name=KH.C1.710;source=kh2013
KH.C10.207	KH2013:KH.C10.207	EML1; EML5; EML6	Cirobu.g00001409	5.66949	1.12762	0.240517	-1.07034	0.264162	2	https://www.aniseed.cnrs.fr/aniseed/gene/show_expression?unique_id=Cirobu.g00001409	https://www.aniseed.cnrs.fr/aniseed/gene/show_gene?unique_id=Cirobu.g00001409	http://ghost.zool.kyoto-u.ac.jp/cgi-bin/fordetailkh21.cgi?name=KH.C10.207;source=kh2013
KH.C11.12	ARSB	ARSB; ARSI; ARSJ	Cirobu.g00001926	1.381	1.12713	0.294148	0.632811	0.565491	0	https://www.aniseed.cnrs.fr/aniseed/gene/show_expression?unique_id=Cirobu.g00001926	https://www.aniseed.cnrs.fr/aniseed/gene/show_gene?unique_id=Cirobu.g00001926	http://ghost.zool.kyoto-u.ac.jp/cgi-bin/fordetailkh21.cgi?name=KH.C11.12;source=kh2013
KH.C8.145	KH2013:KH.C8.145	KH.C8.145	Cirobu.g00008752	0.860496	1.12599	0.366445	-1.0242	0.412043	0	https://www.aniseed.cnrs.fr/aniseed/gene/show_expression?unique_id=Cirobu.g00008752	https://www.aniseed.cnrs.fr/aniseed/gene/show_gene?unique_id=Cirobu.g00008752	http://ghost.zool.kyoto-u.ac.jp/cgi-bin/fordetailkh21.cgi?name=KH.C8.145;source=kh2013
KH.C1.1287	COL1A2	COL1A2; COL24A1; COL27A1	Cirobu.g00000318	1.74955	1.12309	0.294251	-0.864819	0.419164	0	https://www.aniseed.cnrs.fr/aniseed/gene/show_expression?unique_id=Cirobu.g00000318	https://www.aniseed.cnrs.fr/aniseed/gene/show_gene?unique_id=Cirobu.g00000318	http://ghost.zool.kyoto-u.ac.jp/cgi-bin/fordetailkh21.cgi?name=KH.C1.1287;source=kh2013
KH.L96.5	KLHL12/18/20	KLHL12; KLHL20; KLHL3	Cirobu.g00013394	3.89471	1.12152	0.0109449	-0.478988	0.282455	1	https://www.aniseed.cnrs.fr/aniseed/gene/show_expression?unique_id=Cirobu.g00013394	https://www.aniseed.cnrs.fr/aniseed/gene/show_gene?unique_id=Cirobu.g00013394	http://ghost.zool.kyoto-u.ac.jp/cgi-bin/fordetailkh21.cgi?name=KH.L96.5;source=kh2013
KH.C11.528	KH2013:KH.C11.528_CYP-33C1/11/12/3/4/5/6/7/8	CYP2A13; CYP2A6; CYP2J2	Cirobu.g00002367	0.577248	1.12118	0.295315	1.6656	0.124323	0	https://www.aniseed.cnrs.fr/aniseed/gene/show_expression?unique_id=Cirobu.g00002367	https://www.aniseed.cnrs.fr/aniseed/gene/show_gene?unique_id=Cirobu.g00002367	http://ghost.zool.kyoto-u.ac.jp/cgi-bin/fordetailkh21.cgi?name=KH.C11.528;source=kh2013
KH.L19.15	NT5E	NT5E	Cirobu.g00012049	4.64197	1.11949	0.0405485	-0.716046	0.189853	0	https://www.aniseed.cnrs.fr/aniseed/gene/show_expression?unique_id=Cirobu.g00012049	https://www.aniseed.cnrs.fr/aniseed/gene/show_gene?unique_id=Cirobu.g00012049	http://ghost.zool.kyoto-u.ac.jp/cgi-bin/fordetailkh21.cgi?name=KH.L19.15;source=kh2013
KH.C7.122	KH2013:KH.C7.122_SULT6B1	SULT1C3; SULT1C4; SULT6B1	Cirobu.g00007942	5.73734	1.11903	0.188851	1.30777	0.1263	1	https://www.aniseed.cnrs.fr/aniseed/gene/show_expression?unique_id=Cirobu.g00007942	https://www.aniseed.cnrs.fr/aniseed/gene/show_gene?unique_id=Cirobu.g00007942	http://ghost.zool.kyoto-u.ac.jp/cgi-bin/fordetailkh21.cgi?name=KH.C7.122;source=kh2013
KH.C5.172	KH2013:KH.C5.172	KH.C5.172	Cirobu.g00007035	0.586348	1.11779	0.435391	-1.67518	0.272363	0	https://www.aniseed.cnrs.fr/aniseed/gene/show_expression?unique_id=Cirobu.g00007035	https://www.aniseed.cnrs.fr/aniseed/gene/show_gene?unique_id=Cirobu.g00007035	http://ghost.zool.kyoto-u.ac.jp/cgi-bin/fordetailkh21.cgi?name=KH.C5.172;source=kh2013
KH.C1.801	GABRB1	GABRB1; GABRB3; GABRR1	Cirobu.g00001076	1.39672	1.11774	0.0999034	-0.611359	0.407012	0	https://www.aniseed.cnrs.fr/aniseed/gene/show_expression?unique_id=Cirobu.g00001076	https://www.aniseed.cnrs.fr/aniseed/gene/show_gene?unique_id=Cirobu.g00001076	http://ghost.zool.kyoto-u.ac.jp/cgi-bin/fordetailkh21.cgi?name=KH.C1.801;source=kh2013
KH.C1.1285	C1ORF74	C1orf74	Cirobu.g00000316	1.35765	1.11656	0.201662	1.72423	0.0493438	0	https://www.aniseed.cnrs.fr/aniseed/gene/show_expression?unique_id=Cirobu.g00000316	https://www.aniseed.cnrs.fr/aniseed/gene/show_gene?unique_id=Cirobu.g00000316	http://ghost.zool.kyoto-u.ac.jp/cgi-bin/fordetailkh21.cgi?name=KH.C1.1285;source=kh2013
KH.C9.872	ABI3BP	ATOH1; ATOH8; NEUROD4	Cirobu.g00010460	7.28933	1.11621	0.00976875	-0.0526297	0.904129	12	https://www.aniseed.cnrs.fr/aniseed/gene/show_expression?unique_id=Cirobu.g00010460	https://www.aniseed.cnrs.fr/aniseed/gene/show_gene?unique_id=Cirobu.g00010460	http://ghost.zool.kyoto-u.ac.jp/cgi-bin/fordetailkh21.cgi?name=KH.C9.872;source=kh2013
KH.C12.61	MAP3K10/11/9	MAP3K10; MAP3K11; MAP3K9	Cirobu.g00003181	5.74892	1.11247	0.00109511	-0.252947	0.457216	11	https://www.aniseed.cnrs.fr/aniseed/gene/show_expression?unique_id=Cirobu.g00003181	https://www.aniseed.cnrs.fr/aniseed/gene/show_gene?unique_id=Cirobu.g00003181	http://ghost.zool.kyoto-u.ac.jp/cgi-bin/fordetailkh21.cgi?name=KH.C12.61;source=kh2013
KH.C12.199	KH2013:KH.C12.199	KH.C12.199	Cirobu.g00002730	4.23739	1.11141	0.0028379	-0.548652	0.149083	0	https://www.aniseed.cnrs.fr/aniseed/gene/show_expression?unique_id=Cirobu.g00002730	https://www.aniseed.cnrs.fr/aniseed/gene/show_gene?unique_id=Cirobu.g00002730	http://ghost.zool.kyoto-u.ac.jp/cgi-bin/fordetailkh21.cgi?name=KH.C12.199;source=kh2013
KH.C3.219	KH2013:KH.C3.219_MET31/32	GFI1; GFI1B; ZNF665	Cirobu.g00005382	1.79687	1.1097	0.139362	0.606569	0.431406	0	https://www.aniseed.cnrs.fr/aniseed/gene/show_expression?unique_id=Cirobu.g00005382	https://www.aniseed.cnrs.fr/aniseed/gene/show_gene?unique_id=Cirobu.g00005382	http://ghost.zool.kyoto-u.ac.jp/cgi-bin/fordetailkh21.cgi?name=KH.C3.219;source=kh2013
KH.C2.371	KH2013:KH.C2.371_YWHAH	YWHAB; YWHAG; YWHAH	Cirobu.g00004562	3.84188	1.10829	0.0118195	0.149353	0.744479	0	https://www.aniseed.cnrs.fr/aniseed/gene/show_expression?unique_id=Cirobu.g00004562	https://www.aniseed.cnrs.fr/aniseed/gene/show_gene?unique_id=Cirobu.g00004562	http://ghost.zool.kyoto-u.ac.jp/cgi-bin/fordetailkh21.cgi?name=KH.C2.371;source=kh2013
KH.C1.1005	PLCH1/2	PLCH1; PLCH2	Cirobu.g00000009	4.20554	1.10825	0.0460139	-1.17876	0.035068	0	https://www.aniseed.cnrs.fr/aniseed/gene/show_expression?unique_id=Cirobu.g00000009	https://www.aniseed.cnrs.fr/aniseed/gene/show_gene?unique_id=Cirobu.g00000009	http://ghost.zool.kyoto-u.ac.jp/cgi-bin/fordetailkh21.cgi?name=KH.C1.1005;source=kh2013
KH.C11.637	CHAC2	CHAC1; CHAC2	Cirobu.g00002487	0.828688	1.10756	0.141386	0.507528	0.495557	4	https://www.aniseed.cnrs.fr/aniseed/gene/show_expression?unique_id=Cirobu.g00002487	https://www.aniseed.cnrs.fr/aniseed/gene/show_gene?unique_id=Cirobu.g00002487	http://ghost.zool.kyoto-u.ac.jp/cgi-bin/fordetailkh21.cgi?name=KH.C11.637;source=kh2013
KH.C4.709	AKT1/2	AKT2; AKT3	Cirobu.g00006825	1.30203	1.10542	0.501991	0.32157	0.864632	0	https://www.aniseed.cnrs.fr/aniseed/gene/show_expression?unique_id=Cirobu.g00006825	https://www.aniseed.cnrs.fr/aniseed/gene/show_gene?unique_id=Cirobu.g00006825	http://ghost.zool.kyoto-u.ac.jp/cgi-bin/fordetailkh21.cgi?name=KH.C4.709;source=kh2013
KH.C7.246	KH2013:KH.C7.246_TRIM2/3	TRIM2; TRIM3; TRIM71	Cirobu.g00008074	1.53608	1.10455	0.630752	0.426714	0.861702	0	https://www.aniseed.cnrs.fr/aniseed/gene/show_expression?unique_id=Cirobu.g00008074	https://www.aniseed.cnrs.fr/aniseed/gene/show_gene?unique_id=Cirobu.g00008074	http://ghost.zool.kyoto-u.ac.jp/cgi-bin/fordetailkh21.cgi?name=KH.C7.246;source=kh2013
KH.C3.28	SLC6A20A	SLC6A18; SLC6A19; SLC6A20	Cirobu.g00005447	0.756279	1.10418	0.296662	0.552165	0.628889	0	https://www.aniseed.cnrs.fr/aniseed/gene/show_expression?unique_id=Cirobu.g00005447	https://www.aniseed.cnrs.fr/aniseed/gene/show_gene?unique_id=Cirobu.g00005447	http://ghost.zool.kyoto-u.ac.jp/cgi-bin/fordetailkh21.cgi?name=KH.C3.28;source=kh2013
KH.L25.4	KH2013:KH.L25.4	KH.L25.4	Cirobu.g00012256	3.76844	1.10393	0.234678	-1.78969	0.0586684	0	https://www.aniseed.cnrs.fr/aniseed/gene/show_expression?unique_id=Cirobu.g00012256	https://www.aniseed.cnrs.fr/aniseed/gene/show_gene?unique_id=Cirobu.g00012256	http://ghost.zool.kyoto-u.ac.jp/cgi-bin/fordetailkh21.cgi?name=KH.L25.4;source=kh2013
KH.L18.22	BDH1	BDH1; HSD17B6	Cirobu.g00011958	5.80147	1.10382	0.0280781	-0.233396	0.638717	1	https://www.aniseed.cnrs.fr/aniseed/gene/show_expression?unique_id=Cirobu.g00011958	https://www.aniseed.cnrs.fr/aniseed/gene/show_gene?unique_id=Cirobu.g00011958	http://ghost.zool.kyoto-u.ac.jp/cgi-bin/fordetailkh21.cgi?name=KH.L18.22;source=kh2013
KH.C8.738	ERG5	CYP26A1; CYP26B1; CYP26C1	Cirobu.g00009401	5.14473	1.1009	0.260689	2.37314	0.0194856	8	https://www.aniseed.cnrs.fr/aniseed/gene/show_expression?unique_id=Cirobu.g00009401	https://www.aniseed.cnrs.fr/aniseed/gene/show_gene?unique_id=Cirobu.g00009401	http://ghost.zool.kyoto-u.ac.jp/cgi-bin/fordetailkh21.cgi?name=KH.C8.738;source=kh2013
KH.C2.404	PKD1L3	PKD1L1; PKD2; PKD2L1	Cirobu.g00004599	3.1895	1.10063	0.132288	-0.958266	0.200332	0	https://www.aniseed.cnrs.fr/aniseed/gene/show_expression?unique_id=Cirobu.g00004599	https://www.aniseed.cnrs.fr/aniseed/gene/show_gene?unique_id=Cirobu.g00004599	http://ghost.zool.kyoto-u.ac.jp/cgi-bin/fordetailkh21.cgi?name=KH.C2.404;source=kh2013
KH.C4.108	KH2013:KH.C4.108_STIP1	SGTA; STIP1; TTC28	Cirobu.g00006173	2.27806	1.10054	0.0982573	0.255755	0.709557	0	https://www.aniseed.cnrs.fr/aniseed/gene/show_expression?unique_id=Cirobu.g00006173	https://www.aniseed.cnrs.fr/aniseed/gene/show_gene?unique_id=Cirobu.g00006173	http://ghost.zool.kyoto-u.ac.jp/cgi-bin/fordetailkh21.cgi?name=KH.C4.108;source=kh2013
KH.L164.19	ADORA2A	ADORA2A; ADRB2; BRS3	Cirobu.g00011686	3.39194	1.10047	0.0310361	-0.434198	0.401921	0	https://www.aniseed.cnrs.fr/aniseed/gene/show_expression?unique_id=Cirobu.g00011686	https://www.aniseed.cnrs.fr/aniseed/gene/show_gene?unique_id=Cirobu.g00011686	http://ghost.zool.kyoto-u.ac.jp/cgi-bin/fordetailkh21.cgi?name=KH.L164.19;source=kh2013
KH.C7.388	KH2013:KH.C7.388_CHRNB1	CHRNB1; CHRNB4; CHRND	Cirobu.g00008230	3.43745	1.09911	0.280711	0.782547	0.444059	0	https://www.aniseed.cnrs.fr/aniseed/gene/show_expression?unique_id=Cirobu.g00008230	https://www.aniseed.cnrs.fr/aniseed/gene/show_gene?unique_id=Cirobu.g00008230	http://ghost.zool.kyoto-u.ac.jp/cgi-bin/fordetailkh21.cgi?name=KH.C7.388;source=kh2013
KH.L79.2	KH2013:KH.L79.2	KH.L79.2	Cirobu.g00013095	0.196566	1.09895	0.461491	1.01039	0.509158	0	https://www.aniseed.cnrs.fr/aniseed/gene/show_expression?unique_id=Cirobu.g00013095	https://www.aniseed.cnrs.fr/aniseed/gene/show_gene?unique_id=Cirobu.g00013095	http://ghost.zool.kyoto-u.ac.jp/cgi-bin/fordetailkh21.cgi?name=KH.L79.2;source=kh2013
KH.C12.538	ATP6V1F	ATP6V1F	Cirobu.g00003102	4.53155	1.09813	0.027732	0.496081	0.316726	0	https://www.aniseed.cnrs.fr/aniseed/gene/show_expression?unique_id=Cirobu.g00003102	https://www.aniseed.cnrs.fr/aniseed/gene/show_gene?unique_id=Cirobu.g00003102	http://ghost.zool.kyoto-u.ac.jp/cgi-bin/fordetailkh21.cgi?name=KH.C12.538;source=kh2013
KH.L5.21	KH2013:KH.L5.21_ACE	ACHE; BCHE; CES5A	Cirobu.g00012715	0.698308	1.09612	0.529657	0.0073611	1	0	https://www.aniseed.cnrs.fr/aniseed/gene/show_expression?unique_id=Cirobu.g00012715	https://www.aniseed.cnrs.fr/aniseed/gene/show_gene?unique_id=Cirobu.g00012715	http://ghost.zool.kyoto-u.ac.jp/cgi-bin/fordetailkh21.cgi?name=KH.L5.21;source=kh2013
KH.L132.15	SLC24A3/4/5	SLC24A2; SLC24A3; SLC24A4	Cirobu.g00011048	3.57821	1.0961	0.163022	-1.10715	0.15914	0	https://www.aniseed.cnrs.fr/aniseed/gene/show_expression?unique_id=Cirobu.g00011048	https://www.aniseed.cnrs.fr/aniseed/gene/show_gene?unique_id=Cirobu.g00011048	http://ghost.zool.kyoto-u.ac.jp/cgi-bin/fordetailkh21.cgi?name=KH.L132.15;source=kh2013
KH.C2.834	KH2013:KH.C2.834_ACHE	ACHE; BCHE; NLGN4X	Cirobu.g00005069	1.55737	1.09513	0.123771	0.331583	0.66637	0	https://www.aniseed.cnrs.fr/aniseed/gene/show_expression?unique_id=Cirobu.g00005069	https://www.aniseed.cnrs.fr/aniseed/gene/show_gene?unique_id=Cirobu.g00005069	http://ghost.zool.kyoto-u.ac.jp/cgi-bin/fordetailkh21.cgi?name=KH.C2.834;source=kh2013
KH.C7.700	KH2013:KH.C7.700	KH.C7.700	Cirobu.g00008573	0.177219	1.09463	0.356621	0.186401	0.919965	0	https://www.aniseed.cnrs.fr/aniseed/gene/show_expression?unique_id=Cirobu.g00008573	https://www.aniseed.cnrs.fr/aniseed/gene/show_gene?unique_id=Cirobu.g00008573	http://ghost.zool.kyoto-u.ac.jp/cgi-bin/fordetailkh21.cgi?name=KH.C7.700;source=kh2013
KH.C8.876	KH2013:KH.C8.876_MFSD7	FLVCR1; FLVCR2; SLC49A3	Cirobu.g00009552	6.44412	1.09138	0.0502133	-0.793325	0.153093	4	https://www.aniseed.cnrs.fr/aniseed/gene/show_expression?unique_id=Cirobu.g00009552	https://www.aniseed.cnrs.fr/aniseed/gene/show_gene?unique_id=Cirobu.g00009552	http://ghost.zool.kyoto-u.ac.jp/cgi-bin/fordetailkh21.cgi?name=KH.C8.876;source=kh2013
KH.C5.625	KH2013:KH.C5.625_KLHL12/3	KLHL12; KLHL2; KLHL3	Cirobu.g00007530	0.748455	1.09104	0.224622	-1.6429	0.0952601	0	https://www.aniseed.cnrs.fr/aniseed/gene/show_expression?unique_id=Cirobu.g00007530	https://www.aniseed.cnrs.fr/aniseed/gene/show_gene?unique_id=Cirobu.g00007530	http://ghost.zool.kyoto-u.ac.jp/cgi-bin/fordetailkh21.cgi?name=KH.C5.625;source=kh2013
KH.C1.1016	NR6A1	NR5A1; NR6A1; RXRG	Cirobu.g00000021	6.86156	1.08981	0.0127038	-0.24253	0.574937	15	https://www.aniseed.cnrs.fr/aniseed/gene/show_expression?unique_id=Cirobu.g00000021	https://www.aniseed.cnrs.fr/aniseed/gene/show_gene?unique_id=Cirobu.g00000021	http://ghost.zool.kyoto-u.ac.jp/cgi-bin/fordetailkh21.cgi?name=KH.C1.1016;source=kh2013
KH.C7.461	KH2013:KH.C7.461_CRG1	COQ3; METTL7B; NDUFAF5	Cirobu.g00008310	9.45494	1.08863	0.0644373	0.202541	0.727976	0	https://www.aniseed.cnrs.fr/aniseed/gene/show_expression?unique_id=Cirobu.g00008310	https://www.aniseed.cnrs.fr/aniseed/gene/show_gene?unique_id=Cirobu.g00008310	http://ghost.zool.kyoto-u.ac.jp/cgi-bin/fordetailkh21.cgi?name=KH.C7.461;source=kh2013
KH.C11.270	DISP/1/2	DISP1; DISP2; DISP3	Cirobu.g00002090	6.32482	1.08832	0.0691889	0.264554	0.655612	0	https://www.aniseed.cnrs.fr/aniseed/gene/show_expression?unique_id=Cirobu.g00002090	https://www.aniseed.cnrs.fr/aniseed/gene/show_gene?unique_id=Cirobu.g00002090	http://ghost.zool.kyoto-u.ac.jp/cgi-bin/fordetailkh21.cgi?name=KH.C11.270;source=kh2013
KH.C4.478	FSCB	AHNAK2; SF3A2; SPA17	Cirobu.g00006573	2.5442	1.08718	0.0980669	0.0176246	0.987055	0	https://www.aniseed.cnrs.fr/aniseed/gene/show_expression?unique_id=Cirobu.g00006573	https://www.aniseed.cnrs.fr/aniseed/gene/show_gene?unique_id=Cirobu.g00006573	http://ghost.zool.kyoto-u.ac.jp/cgi-bin/fordetailkh21.cgi?name=KH.C4.478;source=kh2013
KH.C14.306	IRF1/10/2/5	IRF1; IRF2; IRF8	Cirobu.g00003732	2.42817	1.08712	0.102031	0.719675	0.283514	10	https://www.aniseed.cnrs.fr/aniseed/gene/show_expression?unique_id=Cirobu.g00003732	https://www.aniseed.cnrs.fr/aniseed/gene/show_gene?unique_id=Cirobu.g00003732	http://ghost.zool.kyoto-u.ac.jp/cgi-bin/fordetailkh21.cgi?name=KH.C14.306;source=kh2013
KH.C9.595	XPR1	XPR1	Cirobu.g00010156	5.48204	1.08641	0.0137356	-0.605489	0.168416	0	https://www.aniseed.cnrs.fr/aniseed/gene/show_expression?unique_id=Cirobu.g00010156	https://www.aniseed.cnrs.fr/aniseed/gene/show_gene?unique_id=Cirobu.g00010156	http://ghost.zool.kyoto-u.ac.jp/cgi-bin/fordetailkh21.cgi?name=KH.C9.595;source=kh2013
KH.C10.351	KH2013:KH.C10.351_CRYM	CRYM	Cirobu.g00001565	3.403	1.08556	0.28232	0.886718	0.379266	11	https://www.aniseed.cnrs.fr/aniseed/gene/show_expression?unique_id=Cirobu.g00001565	https://www.aniseed.cnrs.fr/aniseed/gene/show_gene?unique_id=Cirobu.g00001565	http://ghost.zool.kyoto-u.ac.jp/cgi-bin/fordetailkh21.cgi?name=KH.C10.351;source=kh2013
KH.C9.841	KH2013:KH.C9.841	KH.C9.841	Cirobu.g00010428	1.84371	1.0837	0.137766	0.621241	0.39645	0	https://www.aniseed.cnrs.fr/aniseed/gene/show_expression?unique_id=Cirobu.g00010428	https://www.aniseed.cnrs.fr/aniseed/gene/show_gene?unique_id=Cirobu.g00010428	http://ghost.zool.kyoto-u.ac.jp/cgi-bin/fordetailkh21.cgi?name=KH.C9.841;source=kh2013
KH.C11.368	C7ORF23	TMEM243	Cirobu.g00002195	0.491892	1.08258	0.152253	-0.405564	0.693397	0	https://www.aniseed.cnrs.fr/aniseed/gene/show_expression?unique_id=Cirobu.g00002195	https://www.aniseed.cnrs.fr/aniseed/gene/show_gene?unique_id=Cirobu.g00002195	http://ghost.zool.kyoto-u.ac.jp/cgi-bin/fordetailkh21.cgi?name=KH.C11.368;source=kh2013
KH.C3.223	KH2013:KH.C3.223_ZNFX1	KH.C3.223	Cirobu.g00005387	6.32964	1.08213	0.00844787	0.0655394	0.874759	4	https://www.aniseed.cnrs.fr/aniseed/gene/show_expression?unique_id=Cirobu.g00005387	https://www.aniseed.cnrs.fr/aniseed/gene/show_gene?unique_id=Cirobu.g00005387	http://ghost.zool.kyoto-u.ac.jp/cgi-bin/fordetailkh21.cgi?name=KH.C3.223;source=kh2013
KH.C10.340	KH2013:KH.C10.340_DHRS11	CBR4; DHRS11	Cirobu.g00001553	2.05936	1.08128	0.115304	0.594558	0.401203	0	https://www.aniseed.cnrs.fr/aniseed/gene/show_expression?unique_id=Cirobu.g00001553	https://www.aniseed.cnrs.fr/aniseed/gene/show_gene?unique_id=Cirobu.g00001553	http://ghost.zool.kyoto-u.ac.jp/cgi-bin/fordetailkh21.cgi?name=KH.C10.340;source=kh2013
KH.C9.407	IPMK	IP6K2; IP6K3; IPMK	Cirobu.g00009950	6.57659	1.07767	0.0117209	-0.0888159	0.835818	1	https://www.aniseed.cnrs.fr/aniseed/gene/show_expression?unique_id=Cirobu.g00009950	https://www.aniseed.cnrs.fr/aniseed/gene/show_gene?unique_id=Cirobu.g00009950	http://ghost.zool.kyoto-u.ac.jp/cgi-bin/fordetailkh21.cgi?name=KH.C9.407;source=kh2013
KH.C2.812	PLEKHB1/2	ARHGAP22; PLEKHB1; PLEKHB2	Cirobu.g00005045	1.39805	1.0776	0.128146	0.345583	0.650825	2	https://www.aniseed.cnrs.fr/aniseed/gene/show_expression?unique_id=Cirobu.g00005045	https://www.aniseed.cnrs.fr/aniseed/gene/show_gene?unique_id=Cirobu.g00005045	http://ghost.zool.kyoto-u.ac.jp/cgi-bin/fordetailkh21.cgi?name=KH.C2.812;source=kh2013
KH.C1.1099	SGPL1	PDXDC1; SGPL1	Cirobu.g00000112	7.11538	1.0693	0.00370985	-0.366776	0.315803	0	https://www.aniseed.cnrs.fr/aniseed/gene/show_expression?unique_id=Cirobu.g00000112	https://www.aniseed.cnrs.fr/aniseed/gene/show_gene?unique_id=Cirobu.g00000112	http://ghost.zool.kyoto-u.ac.jp/cgi-bin/fordetailkh21.cgi?name=KH.C1.1099;source=kh2013
KH.L65.2	KH2013:KH.L65.2_MUC3	ANK2; MUC17; SMIM24	Cirobu.g00012926	3.40013	1.06913	0.0966408	-0.226608	0.727188	4	https://www.aniseed.cnrs.fr/aniseed/gene/show_expression?unique_id=Cirobu.g00012926	https://www.aniseed.cnrs.fr/aniseed/gene/show_gene?unique_id=Cirobu.g00012926	http://ghost.zool.kyoto-u.ac.jp/cgi-bin/fordetailkh21.cgi?name=KH.L65.2;source=kh2013
KH.C11.540	PCBP3	NOVA1; NOVA2; PCBP1	Cirobu.g00002381	6.7663	1.06861	0.00700031	-0.836711	0.0346928	0	https://www.aniseed.cnrs.fr/aniseed/gene/show_expression?unique_id=Cirobu.g00002381	https://www.aniseed.cnrs.fr/aniseed/gene/show_gene?unique_id=Cirobu.g00002381	http://ghost.zool.kyoto-u.ac.jp/cgi-bin/fordetailkh21.cgi?name=KH.C11.540;source=kh2013
KH.C5.554	KH2013:KH.C5.554_FER3	ATOH1; NEUROD6; NEUROG2	Cirobu.g00007451	-0.0347612	1.06773	0.474084	-0.035126	1	4	https://www.aniseed.cnrs.fr/aniseed/gene/show_expression?unique_id=Cirobu.g00007451	https://www.aniseed.cnrs.fr/aniseed/gene/show_gene?unique_id=Cirobu.g00007451	http://ghost.zool.kyoto-u.ac.jp/cgi-bin/fordetailkh21.cgi?name=KH.C5.554;source=kh2013
KH.C4.624	KH2013:KH.C4.624_BSC6	MFSD4A; MFSD4B	Cirobu.g00006731	1.71206	1.06514	0.486263	0.853131	0.584649	0	https://www.aniseed.cnrs.fr/aniseed/gene/show_expression?unique_id=Cirobu.g00006731	https://www.aniseed.cnrs.fr/aniseed/gene/show_gene?unique_id=Cirobu.g00006731	http://ghost.zool.kyoto-u.ac.jp/cgi-bin/fordetailkh21.cgi?name=KH.C4.624;source=kh2013
KH.L87.34	KH2013:KH.L87.34_HEPHL1	CP; HEPH; HEPHL1	Cirobu.g00013197	1.40868	1.06464	0.0982244	0.113553	0.884656	0	https://www.aniseed.cnrs.fr/aniseed/gene/show_expression?unique_id=Cirobu.g00013197	https://www.aniseed.cnrs.fr/aniseed/gene/show_gene?unique_id=Cirobu.g00013197	http://ghost.zool.kyoto-u.ac.jp/cgi-bin/fordetailkh21.cgi?name=KH.L87.34;source=kh2013
KH.C4.628	PTPN13	DLG1; FRMPD2; PTPN13	Cirobu.g00006735	4.18377	1.0633	0.0183662	-0.275964	0.54837	14	https://www.aniseed.cnrs.fr/aniseed/gene/show_expression?unique_id=Cirobu.g00006735	https://www.aniseed.cnrs.fr/aniseed/gene/show_gene?unique_id=Cirobu.g00006735	http://ghost.zool.kyoto-u.ac.jp/cgi-bin/fordetailkh21.cgi?name=KH.C4.628;source=kh2013
KH.L20.13	CDH23	CDH23	Cirobu.g00012064	5.04103	1.06248	0.0523195	0.0162018	0.981103	13	https://www.aniseed.cnrs.fr/aniseed/gene/show_expression?unique_id=Cirobu.g00012064	https://www.aniseed.cnrs.fr/aniseed/gene/show_gene?unique_id=Cirobu.g00012064	http://ghost.zool.kyoto-u.ac.jp/cgi-bin/fordetailkh21.cgi?name=KH.L20.13;source=kh2013
KH.L134.29	KH2013:KH.L134.29	KH.L134.29	Cirobu.g00011094	0.40803	1.06205	0.273916	0.473101	0.609105	0	https://www.aniseed.cnrs.fr/aniseed/gene/show_expression?unique_id=Cirobu.g00011094	https://www.aniseed.cnrs.fr/aniseed/gene/show_gene?unique_id=Cirobu.g00011094	http://ghost.zool.kyoto-u.ac.jp/cgi-bin/fordetailkh21.cgi?name=KH.L134.29;source=kh2013
KH.S2067.1	KH2013:KH.S2067.1	KH.S2067.1	Cirobu.g00014180	0.403984	1.06156	0.190406	-0.575629	0.557885	0	https://www.aniseed.cnrs.fr/aniseed/gene/show_expression?unique_id=Cirobu.g00014180	https://www.aniseed.cnrs.fr/aniseed/gene/show_gene?unique_id=Cirobu.g00014180	http://ghost.zool.kyoto-u.ac.jp/cgi-bin/fordetailkh21.cgi?name=KH.S2067.1;source=kh2013
KH.L115.1	KH2013:KH.L115.1	KH.L115.1	Cirobu.g00010732	1.40721	1.06051	0.239232	-0.0144816	1	0	https://www.aniseed.cnrs.fr/aniseed/gene/show_expression?unique_id=Cirobu.g00010732	https://www.aniseed.cnrs.fr/aniseed/gene/show_gene?unique_id=Cirobu.g00010732	http://ghost.zool.kyoto-u.ac.jp/cgi-bin/fordetailkh21.cgi?name=KH.L115.1;source=kh2013
KH.L96.90	KH2013:KH.L96.90	CRABP2	Cirobu.g00013438	0.655826	1.05685	0.303009	0.136353	0.935888	0	https://www.aniseed.cnrs.fr/aniseed/gene/show_expression?unique_id=Cirobu.g00013438	https://www.aniseed.cnrs.fr/aniseed/gene/show_gene?unique_id=Cirobu.g00013438	http://ghost.zool.kyoto-u.ac.jp/cgi-bin/fordetailkh21.cgi?name=KH.L96.90;source=kh2013
KH.C4.423	KH2013:KH.C4.423_PLEC	DSP; EPPK1; PLEC	Cirobu.g00006513	0.498447	1.05633	0.524214	-0.935682	0.551658	0	https://www.aniseed.cnrs.fr/aniseed/gene/show_expression?unique_id=Cirobu.g00006513	https://www.aniseed.cnrs.fr/aniseed/gene/show_gene?unique_id=Cirobu.g00006513	http://ghost.zool.kyoto-u.ac.jp/cgi-bin/fordetailkh21.cgi?name=KH.C4.423;source=kh2013
KH.S1269.1	KH2013:KH.S1269.1	CLDN1; CLDN18; CLDN19	Cirobu.g00013760	3.86291	1.05545	0.0382006	-0.0175266	0.986814	0	https://www.aniseed.cnrs.fr/aniseed/gene/show_expression?unique_id=Cirobu.g00013760	https://www.aniseed.cnrs.fr/aniseed/gene/show_gene?unique_id=Cirobu.g00013760	http://ghost.zool.kyoto-u.ac.jp/cgi-bin/fordetailkh21.cgi?name=KH.S1269.1;source=kh2013
KH.C7.636	ZK180.5	KH.C7.636	Cirobu.g00008502	2.44482	1.05528	0.442339	-0.204806	0.882565	0	https://www.aniseed.cnrs.fr/aniseed/gene/show_expression?unique_id=Cirobu.g00008502	https://www.aniseed.cnrs.fr/aniseed/gene/show_gene?unique_id=Cirobu.g00008502	http://ghost.zool.kyoto-u.ac.jp/cgi-bin/fordetailkh21.cgi?name=KH.C7.636;source=kh2013
KH.L47.5	FMN2	FMN1; FMN2	Cirobu.g00012698	2.79848	1.0547	0.0641373	-0.340978	0.556094	0	https://www.aniseed.cnrs.fr/aniseed/gene/show_expression?unique_id=Cirobu.g00012698	https://www.aniseed.cnrs.fr/aniseed/gene/show_gene?unique_id=Cirobu.g00012698	http://ghost.zool.kyoto-u.ac.jp/cgi-bin/fordetailkh21.cgi?name=KH.L47.5;source=kh2013
KH.L135.3	NOXRED1	NOXRED1; PYCR3	Cirobu.g00011106	1.03807	1.05467	0.160766	0.900889	0.244519	0	https://www.aniseed.cnrs.fr/aniseed/gene/show_expression?unique_id=Cirobu.g00011106	https://www.aniseed.cnrs.fr/aniseed/gene/show_gene?unique_id=Cirobu.g00011106	http://ghost.zool.kyoto-u.ac.jp/cgi-bin/fordetailkh21.cgi?name=KH.L135.3;source=kh2013
KH.C11.574	KH2013:KH.C11.574_DRD2	ADRA1A; DRD2; HTR1A	Cirobu.g00002418	0.70073	1.05453	0.268694	0.366791	0.721964	0	https://www.aniseed.cnrs.fr/aniseed/gene/show_expression?unique_id=Cirobu.g00002418	https://www.aniseed.cnrs.fr/aniseed/gene/show_gene?unique_id=Cirobu.g00002418	http://ghost.zool.kyoto-u.ac.jp/cgi-bin/fordetailkh21.cgi?name=KH.C11.574;source=kh2013
KH.C9.885	OXTR	AVPR1A; AVPR1B; OXTR	Cirobu.g00010474	3.07067	1.05429	0.26982	-0.317453	0.737857	2	https://www.aniseed.cnrs.fr/aniseed/gene/show_expression?unique_id=Cirobu.g00010474	https://www.aniseed.cnrs.fr/aniseed/gene/show_gene?unique_id=Cirobu.g00010474	http://ghost.zool.kyoto-u.ac.jp/cgi-bin/fordetailkh21.cgi?name=KH.C9.885;source=kh2013
KH.C12.579	CG30419	KH.C12.579	Cirobu.g00003147	5.33572	1.05377	0.0629878	-0.362673	0.525251	1	https://www.aniseed.cnrs.fr/aniseed/gene/show_expression?unique_id=Cirobu.g00003147	https://www.aniseed.cnrs.fr/aniseed/gene/show_gene?unique_id=Cirobu.g00003147	http://ghost.zool.kyoto-u.ac.jp/cgi-bin/fordetailkh21.cgi?name=KH.C12.579;source=kh2013
KH.C4.135	PPTC7	PPM1E; PPTC7	Cirobu.g00006202	6.26348	1.05104	0.00600088	-0.331178	0.38743	4	https://www.aniseed.cnrs.fr/aniseed/gene/show_expression?unique_id=Cirobu.g00006202	https://www.aniseed.cnrs.fr/aniseed/gene/show_gene?unique_id=Cirobu.g00006202	http://ghost.zool.kyoto-u.ac.jp/cgi-bin/fordetailkh21.cgi?name=KH.C4.135;source=kh2013
KH.C8.796	EPHA3/5/7	EPHA4; EPHA7; EPHB2	Cirobu.g00009465	6.43547	1.05104	0.0321361	-0.1685	0.728923	9	https://www.aniseed.cnrs.fr/aniseed/gene/show_expression?unique_id=Cirobu.g00009465	https://www.aniseed.cnrs.fr/aniseed/gene/show_gene?unique_id=Cirobu.g00009465	http://ghost.zool.kyoto-u.ac.jp/cgi-bin/fordetailkh21.cgi?name=KH.C8.796;source=kh2013
KH.S115.39	C1ORF114	CCDC181	Cirobu.g00013661	1.28316	1.0502	0.193122	-0.614766	0.497523	0	https://www.aniseed.cnrs.fr/aniseed/gene/show_expression?unique_id=Cirobu.g00013661	https://www.aniseed.cnrs.fr/aniseed/gene/show_gene?unique_id=Cirobu.g00013661	http://ghost.zool.kyoto-u.ac.jp/cgi-bin/fordetailkh21.cgi?name=KH.S115.39;source=kh2013
KH.L86.1	KH2013:KH.L86.1	KH.L86.1	Cirobu.g00013169	1.28813	1.05002	0.251264	-0.608511	0.508425	0	https://www.aniseed.cnrs.fr/aniseed/gene/show_expression?unique_id=Cirobu.g00013169	https://www.aniseed.cnrs.fr/aniseed/gene/show_gene?unique_id=Cirobu.g00013169	http://ghost.zool.kyoto-u.ac.jp/cgi-bin/fordetailkh21.cgi?name=KH.L86.1;source=kh2013
KH.C3.346	KH2013:KH.C3.346	KH.C3.346	Cirobu.g00005519	0.580905	1.04969	0.327157	1.7561	0.0945852	0	https://www.aniseed.cnrs.fr/aniseed/gene/show_expression?unique_id=Cirobu.g00005519	https://www.aniseed.cnrs.fr/aniseed/gene/show_gene?unique_id=Cirobu.g00005519	http://ghost.zool.kyoto-u.ac.jp/cgi-bin/fordetailkh21.cgi?name=KH.C3.346;source=kh2013
KH.L164.9	KH2013:KH.L164.9_ADORA2AB	ADORA2A; ADORA2B; TAAR2	Cirobu.g00011696	3.92177	1.04944	0.0211017	-0.102126	0.822674	0	https://www.aniseed.cnrs.fr/aniseed/gene/show_expression?unique_id=Cirobu.g00011696	https://www.aniseed.cnrs.fr/aniseed/gene/show_gene?unique_id=Cirobu.g00011696	http://ghost.zool.kyoto-u.ac.jp/cgi-bin/fordetailkh21.cgi?name=KH.L164.9;source=kh2013
KH.L19.11	KH2013:KH.L19.11	KH.L19.11	Cirobu.g00012045	1.19304	1.04685	0.285664	0.0824295	0.93225	0	https://www.aniseed.cnrs.fr/aniseed/gene/show_expression?unique_id=Cirobu.g00012045	https://www.aniseed.cnrs.fr/aniseed/gene/show_gene?unique_id=Cirobu.g00012045	http://ghost.zool.kyoto-u.ac.jp/cgi-bin/fordetailkh21.cgi?name=KH.L19.11;source=kh2013
KH.C2.62	KH2013:KH.C2.62_MGAT4B	MGAT4A; MGAT4B; MGAT4D	Cirobu.g00004837	3.48108	1.04647	0.0227301	0.424236	0.365058	0	https://www.aniseed.cnrs.fr/aniseed/gene/show_expression?unique_id=Cirobu.g00004837	https://www.aniseed.cnrs.fr/aniseed/gene/show_gene?unique_id=Cirobu.g00004837	http://ghost.zool.kyoto-u.ac.jp/cgi-bin/fordetailkh21.cgi?name=KH.C2.62;source=kh2013
KH.L41.7	GPR152	ARMCX4; CUBN; GPR152	Cirobu.g00012625	2.50227	1.04048	0.227849	0.830976	0.340039	0	https://www.aniseed.cnrs.fr/aniseed/gene/show_expression?unique_id=Cirobu.g00012625	https://www.aniseed.cnrs.fr/aniseed/gene/show_gene?unique_id=Cirobu.g00012625	http://ghost.zool.kyoto-u.ac.jp/cgi-bin/fordetailkh21.cgi?name=KH.L41.7;source=kh2013
KH.S514.6	PIRT	PIRT	Cirobu.g00014608	4.32776	1.04041	0.266764	-0.719681	0.439759	1	https://www.aniseed.cnrs.fr/aniseed/gene/show_expression?unique_id=Cirobu.g00014608	https://www.aniseed.cnrs.fr/aniseed/gene/show_gene?unique_id=Cirobu.g00014608	http://ghost.zool.kyoto-u.ac.jp/cgi-bin/fordetailkh21.cgi?name=KH.S514.6;source=kh2013
KH.C3.740	KH2013:KH.C3.740_EXD2	EXD2; EXD3; WRN	Cirobu.g00005943	2.66446	1.03951	0.0718353	0.126126	0.857607	0	https://www.aniseed.cnrs.fr/aniseed/gene/show_expression?unique_id=Cirobu.g00005943	https://www.aniseed.cnrs.fr/aniseed/gene/show_gene?unique_id=Cirobu.g00005943	http://ghost.zool.kyoto-u.ac.jp/cgi-bin/fordetailkh21.cgi?name=KH.C3.740;source=kh2013
KH.C11.411	KH2013:KH.C11.411	KH.C11.411	Cirobu.g00002243	0.22784	1.0393	0.26402	0.0857649	1	0	https://www.aniseed.cnrs.fr/aniseed/gene/show_expression?unique_id=Cirobu.g00002243	https://www.aniseed.cnrs.fr/aniseed/gene/show_gene?unique_id=Cirobu.g00002243	http://ghost.zool.kyoto-u.ac.jp/cgi-bin/fordetailkh21.cgi?name=KH.C11.411;source=kh2013
KH.C4.267	KH2013:KH.C4.267_GJA10	GJA10; GJA8; GJC1	Cirobu.g00006343	1.5969	1.03887	0.475746	-0.785851	0.589884	0	https://www.aniseed.cnrs.fr/aniseed/gene/show_expression?unique_id=Cirobu.g00006343	https://www.aniseed.cnrs.fr/aniseed/gene/show_gene?unique_id=Cirobu.g00006343	http://ghost.zool.kyoto-u.ac.jp/cgi-bin/fordetailkh21.cgi?name=KH.C4.267;source=kh2013
KH.C3.834	KH2013:KH.C3.834	KH.C3.834	Cirobu.g00006043	0.266978	1.0356	0.192077	0.355603	0.687654	0	https://www.aniseed.cnrs.fr/aniseed/gene/show_expression?unique_id=Cirobu.g00006043	https://www.aniseed.cnrs.fr/aniseed/gene/show_gene?unique_id=Cirobu.g00006043	http://ghost.zool.kyoto-u.ac.jp/cgi-bin/fordetailkh21.cgi?name=KH.C3.834;source=kh2013
KH.C8.449	KH2013:KH.C8.449_HSD17B14	HSD17B8	Cirobu.g00009084	2.95316	1.03514	0.0769803	0.0500136	0.946707	0	https://www.aniseed.cnrs.fr/aniseed/gene/show_expression?unique_id=Cirobu.g00009084	https://www.aniseed.cnrs.fr/aniseed/gene/show_gene?unique_id=Cirobu.g00009084	http://ghost.zool.kyoto-u.ac.jp/cgi-bin/fordetailkh21.cgi?name=KH.C8.449;source=kh2013
KH.C3.458	KH2013:KH.C3.458	KH.C3.458	Cirobu.g00005640	3.52163	1.03495	0.204409	0.150122	0.854421	0	https://www.aniseed.cnrs.fr/aniseed/gene/show_expression?unique_id=Cirobu.g00005640	https://www.aniseed.cnrs.fr/aniseed/gene/show_gene?unique_id=Cirobu.g00005640	http://ghost.zool.kyoto-u.ac.jp/cgi-bin/fordetailkh21.cgi?name=KH.C3.458;source=kh2013
KH.C12.380	AGPAT3/4	AGPAT3; AGPAT4; AGPAT5	Cirobu.g00002931	5.94	1.03282	0.0157576	-0.492273	0.247781	0	https://www.aniseed.cnrs.fr/aniseed/gene/show_expression?unique_id=Cirobu.g00002931	https://www.aniseed.cnrs.fr/aniseed/gene/show_gene?unique_id=Cirobu.g00002931	http://ghost.zool.kyoto-u.ac.jp/cgi-bin/fordetailkh21.cgi?name=KH.C12.380;source=kh2013
KH.L42.1	KH2013:KH.L42.1	KH.L42.1	Cirobu.g00012634	0.678294	1.03237	0.277001	0.435236	0.662914	0	https://www.aniseed.cnrs.fr/aniseed/gene/show_expression?unique_id=Cirobu.g00012634	https://www.aniseed.cnrs.fr/aniseed/gene/show_gene?unique_id=Cirobu.g00012634	http://ghost.zool.kyoto-u.ac.jp/cgi-bin/fordetailkh21.cgi?name=KH.L42.1;source=kh2013
KH.C9.401	NSF/2	NSF	Cirobu.g00009944	8.15092	1.03151	0.0329517	-0.28302	0.555151	0	https://www.aniseed.cnrs.fr/aniseed/gene/show_expression?unique_id=Cirobu.g00009944	https://www.aniseed.cnrs.fr/aniseed/gene/show_gene?unique_id=Cirobu.g00009944	http://ghost.zool.kyoto-u.ac.jp/cgi-bin/fordetailkh21.cgi?name=KH.C9.401;source=kh2013
KH.S546.8	SI:CH211-218M3.16	OR5F1; OR5M3; OR5M8	Cirobu.g00014672	2.56327	1.02965	0.0646123	0.359086	0.517285	0	https://www.aniseed.cnrs.fr/aniseed/gene/show_expression?unique_id=Cirobu.g00014672	https://www.aniseed.cnrs.fr/aniseed/gene/show_gene?unique_id=Cirobu.g00014672	http://ghost.zool.kyoto-u.ac.jp/cgi-bin/fordetailkh21.cgi?name=KH.S546.8;source=kh2013
KH.C2.534	CHIC1/2	CHIC1; CHIC2	Cirobu.g00004742	4.89373	1.02795	0.0207528	0.361108	0.414746	0	https://www.aniseed.cnrs.fr/aniseed/gene/show_expression?unique_id=Cirobu.g00004742	https://www.aniseed.cnrs.fr/aniseed/gene/show_gene?unique_id=Cirobu.g00004742	http://ghost.zool.kyoto-u.ac.jp/cgi-bin/fordetailkh21.cgi?name=KH.C2.534;source=kh2013
KH.C11.47	KH2013:KH.C11.47	KH.C11.47	Cirobu.g00002304	1.01205	1.02631	0.185965	0.489451	0.572394	0	https://www.aniseed.cnrs.fr/aniseed/gene/show_expression?unique_id=Cirobu.g00002304	https://www.aniseed.cnrs.fr/aniseed/gene/show_gene?unique_id=Cirobu.g00002304	http://ghost.zool.kyoto-u.ac.jp/cgi-bin/fordetailkh21.cgi?name=KH.C11.47;source=kh2013
KH.C10.277	A730011L01RIK	ENDOV	Cirobu.g00001486	3.29338	1.02522	0.0373519	-0.210705	0.688457	0	https://www.aniseed.cnrs.fr/aniseed/gene/show_expression?unique_id=Cirobu.g00001486	https://www.aniseed.cnrs.fr/aniseed/gene/show_gene?unique_id=Cirobu.g00001486	http://ghost.zool.kyoto-u.ac.jp/cgi-bin/fordetailkh21.cgi?name=KH.C10.277;source=kh2013
KH.S588.2	KH2013:KH.S588.2	KH.S588.2	Cirobu.g00014735	3.38867	1.02493	0.237075	0.912699	0.293465	0	https://www.aniseed.cnrs.fr/aniseed/gene/show_expression?unique_id=Cirobu.g00014735	https://www.aniseed.cnrs.fr/aniseed/gene/show_gene?unique_id=Cirobu.g00014735	http://ghost.zool.kyoto-u.ac.jp/cgi-bin/fordetailkh21.cgi?name=KH.S588.2;source=kh2013
KH.C1.19	ANKMY2	ANKMY2; ANKRD39; TANC2	Cirobu.g00000403	7.13431	1.02477	0.022175	-0.687143	0.124156	12	https://www.aniseed.cnrs.fr/aniseed/gene/show_expression?unique_id=Cirobu.g00000403	https://www.aniseed.cnrs.fr/aniseed/gene/show_gene?unique_id=Cirobu.g00000403	http://ghost.zool.kyoto-u.ac.jp/cgi-bin/fordetailkh21.cgi?name=KH.C1.19;source=kh2013
KH.C7.387	KH2013:KH.C7.387_CPB1/2	CPA3; CPA6; CPB1	Cirobu.g00008229	2.75306	1.02397	0.0792185	0.291847	0.636863	0	https://www.aniseed.cnrs.fr/aniseed/gene/show_expression?unique_id=Cirobu.g00008229	https://www.aniseed.cnrs.fr/aniseed/gene/show_gene?unique_id=Cirobu.g00008229	http://ghost.zool.kyoto-u.ac.jp/cgi-bin/fordetailkh21.cgi?name=KH.C7.387;source=kh2013
KH.C9.232	SCAI	SCAI	Cirobu.g00009759	5.67317	1.02244	0.0294662	-0.0388486	0.937692	4	https://www.aniseed.cnrs.fr/aniseed/gene/show_expression?unique_id=Cirobu.g00009759	https://www.aniseed.cnrs.fr/aniseed/gene/show_gene?unique_id=Cirobu.g00009759	http://ghost.zool.kyoto-u.ac.jp/cgi-bin/fordetailkh21.cgi?name=KH.C9.232;source=kh2013
KH.C6.128	CELF3/4/5/6	CELF3; CELF5; CELF6	Cirobu.g00007645	9.44544	1.01996	0.0160039	-0.602997	0.151843	99	https://www.aniseed.cnrs.fr/aniseed/gene/show_expression?unique_id=Cirobu.g00007645	https://www.aniseed.cnrs.fr/aniseed/gene/show_gene?unique_id=Cirobu.g00007645	http://ghost.zool.kyoto-u.ac.jp/cgi-bin/fordetailkh21.cgi?name=KH.C6.128;source=kh2013
KH.C7.51	KH2013:KH.C7.51	KH.C7.51	Cirobu.g00008363	5.04902	1.01827	0.0636749	1.20754	0.0285628	2	https://www.aniseed.cnrs.fr/aniseed/gene/show_expression?unique_id=Cirobu.g00008363	https://www.aniseed.cnrs.fr/aniseed/gene/show_gene?unique_id=Cirobu.g00008363	http://ghost.zool.kyoto-u.ac.jp/cgi-bin/fordetailkh21.cgi?name=KH.C7.51;source=kh2013
KH.C7.478	SI:DKEY-98P3.7	KH.C7.478	Cirobu.g00008328	5.6674	1.0168	0.0353123	-0.269152	0.576234	0	https://www.aniseed.cnrs.fr/aniseed/gene/show_expression?unique_id=Cirobu.g00008328	https://www.aniseed.cnrs.fr/aniseed/gene/show_gene?unique_id=Cirobu.g00008328	http://ghost.zool.kyoto-u.ac.jp/cgi-bin/fordetailkh21.cgi?name=KH.C7.478;source=kh2013
KH.C12.22	KH2013:KH.C12.22	KH.C12.22	Cirobu.g00002754	3.57588	1.01638	0.113515	-0.0818174	0.904224	0	https://www.aniseed.cnrs.fr/aniseed/gene/show_expression?unique_id=Cirobu.g00002754	https://www.aniseed.cnrs.fr/aniseed/gene/show_gene?unique_id=Cirobu.g00002754	http://ghost.zool.kyoto-u.ac.jp/cgi-bin/fordetailkh21.cgi?name=KH.C12.22;source=kh2013
KH.C1.457	KLHL1/4/5	KLHL1; KLHL4; KLHL5	Cirobu.g00000699	7.58374	1.01629	0.00841148	-0.214835	0.574242	0	https://www.aniseed.cnrs.fr/aniseed/gene/show_expression?unique_id=Cirobu.g00000699	https://www.aniseed.cnrs.fr/aniseed/gene/show_gene?unique_id=Cirobu.g00000699	http://ghost.zool.kyoto-u.ac.jp/cgi-bin/fordetailkh21.cgi?name=KH.C1.457;source=kh2013
KH.C2.724	SOLH	CAPN12; CAPN15	Cirobu.g00004949	4.11225	1.01595	0.0291095	-0.445709	0.338888	11	https://www.aniseed.cnrs.fr/aniseed/gene/show_expression?unique_id=Cirobu.g00004949	https://www.aniseed.cnrs.fr/aniseed/gene/show_gene?unique_id=Cirobu.g00004949	http://ghost.zool.kyoto-u.ac.jp/cgi-bin/fordetailkh21.cgi?name=KH.C2.724;source=kh2013
KH.C8.18	TMEM43	AC090004.1; TMEM43	Cirobu.g00008790	5.11916	1.01175	0.00668495	-0.0744602	0.852078	1	https://www.aniseed.cnrs.fr/aniseed/gene/show_expression?unique_id=Cirobu.g00008790	https://www.aniseed.cnrs.fr/aniseed/gene/show_gene?unique_id=Cirobu.g00008790	http://ghost.zool.kyoto-u.ac.jp/cgi-bin/fordetailkh21.cgi?name=KH.C8.18;source=kh2013
KH.C1.367	SLC39A10/6	SLC39A10; SLC39A14; SLC39A6	Cirobu.g00000600	6.82174	1.00942	0.124911	-0.650387	0.320693	0	https://www.aniseed.cnrs.fr/aniseed/gene/show_expression?unique_id=Cirobu.g00000600	https://www.aniseed.cnrs.fr/aniseed/gene/show_gene?unique_id=Cirobu.g00000600	http://ghost.zool.kyoto-u.ac.jp/cgi-bin/fordetailkh21.cgi?name=KH.C1.367;source=kh2013
KH.L18.81	KLC/1/2/4	KLC1; KLC2; KLC4	Cirobu.g00012023	6.54645	1.00859	0.037605	-0.475522	0.323849	0	https://www.aniseed.cnrs.fr/aniseed/gene/show_expression?unique_id=Cirobu.g00012023	https://www.aniseed.cnrs.fr/aniseed/gene/show_gene?unique_id=Cirobu.g00012023	http://ghost.zool.kyoto-u.ac.jp/cgi-bin/fordetailkh21.cgi?name=KH.L18.81;source=kh2013
KH.L96.37	IAH1	IAH1	Cirobu.g00013380	1.83806	1.00811	0.0948422	0.337536	0.609032	0	https://www.aniseed.cnrs.fr/aniseed/gene/show_expression?unique_id=Cirobu.g00013380	https://www.aniseed.cnrs.fr/aniseed/gene/show_gene?unique_id=Cirobu.g00013380	http://ghost.zool.kyoto-u.ac.jp/cgi-bin/fordetailkh21.cgi?name=KH.L96.37;source=kh2013
KH.C2.828	PDCL	PDC; PDCL; PDCL2	Cirobu.g00005062	5.93003	1.00698	0.0199939	-0.0559123	0.895611	1	https://www.aniseed.cnrs.fr/aniseed/gene/show_expression?unique_id=Cirobu.g00005062	https://www.aniseed.cnrs.fr/aniseed/gene/show_gene?unique_id=Cirobu.g00005062	http://ghost.zool.kyoto-u.ac.jp/cgi-bin/fordetailkh21.cgi?name=KH.C2.828;source=kh2013
KH.L96.22	GNB5	GNB2; GNB4; GNB5	Cirobu.g00013364	6.84625	1.00592	0.00384099	-0.255885	0.459725	0	https://www.aniseed.cnrs.fr/aniseed/gene/show_expression?unique_id=Cirobu.g00013364	https://www.aniseed.cnrs.fr/aniseed/gene/show_gene?unique_id=Cirobu.g00013364	http://ghost.zool.kyoto-u.ac.jp/cgi-bin/fordetailkh21.cgi?name=KH.L96.22;source=kh2013
KH.C1.1116	HAND/2	HAND1; HAND2; SCX	Cirobu.g00000132	2.5348	1.00449	0.195511	0.811293	0.297106	41	https://www.aniseed.cnrs.fr/aniseed/gene/show_expression?unique_id=Cirobu.g00000132	https://www.aniseed.cnrs.fr/aniseed/gene/show_gene?unique_id=Cirobu.g00000132	http://ghost.zool.kyoto-u.ac.jp/cgi-bin/fordetailkh21.cgi?name=KH.C1.1116;source=kh2013
KH.S484.1	SSU-2	SSUH2	Cirobu.g00014567	4.1612	1.00377	0.0282913	-0.499243	0.287481	0	https://www.aniseed.cnrs.fr/aniseed/gene/show_expression?unique_id=Cirobu.g00014567	https://www.aniseed.cnrs.fr/aniseed/gene/show_gene?unique_id=Cirobu.g00014567	http://ghost.zool.kyoto-u.ac.jp/cgi-bin/fordetailkh21.cgi?name=KH.S484.1;source=kh2013
KH.C2.865	CCKAR	CCKAR; CCKBR; HCRTR2	Cirobu.g00005103	0.410729	1.00355	0.242349	0.00609851	1	0	https://www.aniseed.cnrs.fr/aniseed/gene/show_expression?unique_id=Cirobu.g00005103	https://www.aniseed.cnrs.fr/aniseed/gene/show_gene?unique_id=Cirobu.g00005103	http://ghost.zool.kyoto-u.ac.jp/cgi-bin/fordetailkh21.cgi?name=KH.C2.865;source=kh2013
KH.C1.1146	KH2013:KH.C1.1146_QDR1/2/3	SLC22A13; SLC22A16; SLC22A4	Cirobu.g00000164	2.83572	1.0015	0.218508	-0.0307094	0.966469	0	https://www.aniseed.cnrs.fr/aniseed/gene/show_expression?unique_id=Cirobu.g00000164	https://www.aniseed.cnrs.fr/aniseed/gene/show_gene?unique_id=Cirobu.g00000164	http://ghost.zool.kyoto-u.ac.jp/cgi-bin/fordetailkh21.cgi?name=KH.C1.1146;source=kh2013
KH.C5.546	SACM1L	INPP5F; SACM1L; SYNJ1	Cirobu.g00007442	6.23632	0.999589	0.0106078	0.0382205	0.92331	1	https://www.aniseed.cnrs.fr/aniseed/gene/show_expression?unique_id=Cirobu.g00007442	https://www.aniseed.cnrs.fr/aniseed/gene/show_gene?unique_id=Cirobu.g00007442	http://ghost.zool.kyoto-u.ac.jp/cgi-bin/fordetailkh21.cgi?name=KH.C5.546;source=kh2013
KH.L41.4	C20H1ORF112	C1orf112	Cirobu.g00012592	3.38903	0.997505	0.0510273	0.122408	0.835463	0	https://www.aniseed.cnrs.fr/aniseed/gene/show_expression?unique_id=Cirobu.g00012592	https://www.aniseed.cnrs.fr/aniseed/gene/show_gene?unique_id=Cirobu.g00012592	http://ghost.zool.kyoto-u.ac.jp/cgi-bin/fordetailkh21.cgi?name=KH.L41.4;source=kh2013
KH.C8.657	KH2013:KH.C8.657	KH.C8.657	Cirobu.g00009311	2.25952	0.995492	0.271086	0.149728	0.878884	0	https://www.aniseed.cnrs.fr/aniseed/gene/show_expression?unique_id=Cirobu.g00009311	https://www.aniseed.cnrs.fr/aniseed/gene/show_gene?unique_id=Cirobu.g00009311	http://ghost.zool.kyoto-u.ac.jp/cgi-bin/fordetailkh21.cgi?name=KH.C8.657;source=kh2013
KH.L20.8	KH2013:KH.L20.8	KH.L20.8	Cirobu.g00012120	3.20483	0.995178	0.105662	-0.15286	0.801607	9	https://www.aniseed.cnrs.fr/aniseed/gene/show_expression?unique_id=Cirobu.g00012120	https://www.aniseed.cnrs.fr/aniseed/gene/show_gene?unique_id=Cirobu.g00012120	http://ghost.zool.kyoto-u.ac.jp/cgi-bin/fordetailkh21.cgi?name=KH.L20.8;source=kh2013
KH.S910.3	HDAC11	HDAC1; HDAC11; HDAC3	Cirobu.g00015180	4.87157	0.995028	0.0132894	-0.451898	0.267676	0	https://www.aniseed.cnrs.fr/aniseed/gene/show_expression?unique_id=Cirobu.g00015180	https://www.aniseed.cnrs.fr/aniseed/gene/show_gene?unique_id=Cirobu.g00015180	http://ghost.zool.kyoto-u.ac.jp/cgi-bin/fordetailkh21.cgi?name=KH.S910.3;source=kh2013
KH.C7.52	CABIN1	CABIN1	Cirobu.g00008374	6.49287	0.990844	0.00284367	-0.300888	0.36387	7	https://www.aniseed.cnrs.fr/aniseed/gene/show_expression?unique_id=Cirobu.g00008374	https://www.aniseed.cnrs.fr/aniseed/gene/show_gene?unique_id=Cirobu.g00008374	http://ghost.zool.kyoto-u.ac.jp/cgi-bin/fordetailkh21.cgi?name=KH.C7.52;source=kh2013
KH.C2.230	CHMP2A	CHMP2A; CHMP2B; CHMP3	Cirobu.g00004409	6.87353	0.990671	0.0195357	0.357049	0.396563	4	https://www.aniseed.cnrs.fr/aniseed/gene/show_expression?unique_id=Cirobu.g00004409	https://www.aniseed.cnrs.fr/aniseed/gene/show_gene?unique_id=Cirobu.g00004409	http://ghost.zool.kyoto-u.ac.jp/cgi-bin/fordetailkh21.cgi?name=KH.C2.230;source=kh2013
KH.C2.1125	TXNDC9	PDCL2; PDCL3; TXNDC9	Cirobu.g00004252	7.46523	0.990169	0.00784504	0.0789689	0.830372	0	https://www.aniseed.cnrs.fr/aniseed/gene/show_expression?unique_id=Cirobu.g00004252	https://www.aniseed.cnrs.fr/aniseed/gene/show_gene?unique_id=Cirobu.g00004252	http://ghost.zool.kyoto-u.ac.jp/cgi-bin/fordetailkh21.cgi?name=KH.C2.1125;source=kh2013
KH.C2.256	PRAF2	ARL6IP5; PRAF2; RABAC1	Cirobu.g00004436	5.37772	0.990014	0.0114038	0.155004	0.689711	0	https://www.aniseed.cnrs.fr/aniseed/gene/show_expression?unique_id=Cirobu.g00004436	https://www.aniseed.cnrs.fr/aniseed/gene/show_gene?unique_id=Cirobu.g00004436	http://ghost.zool.kyoto-u.ac.jp/cgi-bin/fordetailkh21.cgi?name=KH.C2.256;source=kh2013
KH.L71.1	RBPMS/2	RBPMS; RBPMS2; SNRPB2	Cirobu.g00013008	4.35882	0.989054	0.148593	-1.79448	0.010452	0	https://www.aniseed.cnrs.fr/aniseed/gene/show_expression?unique_id=Cirobu.g00013008	https://www.aniseed.cnrs.fr/aniseed/gene/show_gene?unique_id=Cirobu.g00013008	http://ghost.zool.kyoto-u.ac.jp/cgi-bin/fordetailkh21.cgi?name=KH.L71.1;source=kh2013
KH.C3.813	GDF11	GDF11; INHBB; MSTN	Cirobu.g00006021	2.03701	0.988936	0.338627	0.552789	0.593902	12	https://www.aniseed.cnrs.fr/aniseed/gene/show_expression?unique_id=Cirobu.g00006021	https://www.aniseed.cnrs.fr/aniseed/gene/show_gene?unique_id=Cirobu.g00006021	http://ghost.zool.kyoto-u.ac.jp/cgi-bin/fordetailkh21.cgi?name=KH.C3.813;source=kh2013
KH.C9.222	KCNH3/4/8	KCNH3; KCNH4; KCNH8	Cirobu.g00009748	3.35663	0.988264	0.0990377	-0.313451	0.614837	2	https://www.aniseed.cnrs.fr/aniseed/gene/show_expression?unique_id=Cirobu.g00009748	https://www.aniseed.cnrs.fr/aniseed/gene/show_gene?unique_id=Cirobu.g00009748	http://ghost.zool.kyoto-u.ac.jp/cgi-bin/fordetailkh21.cgi?name=KH.C9.222;source=kh2013
KH.C10.124	KH2013:KH.C10.124	PIK3R5; PIK3R6	Cirobu.g00001321	6.24817	0.986786	0.121914	-0.230305	0.716212	0	https://www.aniseed.cnrs.fr/aniseed/gene/show_expression?unique_id=Cirobu.g00001321	https://www.aniseed.cnrs.fr/aniseed/gene/show_gene?unique_id=Cirobu.g00001321	http://ghost.zool.kyoto-u.ac.jp/cgi-bin/fordetailkh21.cgi?name=KH.C10.124;source=kh2013
KH.C5.278	VEZT	VEZT	Cirobu.g00007150	4.68858	0.986621	0.0404209	0.0804102	0.865	2	https://www.aniseed.cnrs.fr/aniseed/gene/show_expression?unique_id=Cirobu.g00007150	https://www.aniseed.cnrs.fr/aniseed/gene/show_gene?unique_id=Cirobu.g00007150	http://ghost.zool.kyoto-u.ac.jp/cgi-bin/fordetailkh21.cgi?name=KH.C5.278;source=kh2013
KH.C10.297	MOK	ICK; MAK; MOK	Cirobu.g00001507	1.78624	0.986112	0.196453	0.102678	0.927164	0	https://www.aniseed.cnrs.fr/aniseed/gene/show_expression?unique_id=Cirobu.g00001507	https://www.aniseed.cnrs.fr/aniseed/gene/show_gene?unique_id=Cirobu.g00001507	http://ghost.zool.kyoto-u.ac.jp/cgi-bin/fordetailkh21.cgi?name=KH.C10.297;source=kh2013
KH.C5.667	KH2013:KH.C5.667	ATPAF1	Cirobu.g00007576	1.18226	0.985384	0.181994	1.05101	0.165699	9	https://www.aniseed.cnrs.fr/aniseed/gene/show_expression?unique_id=Cirobu.g00007576	https://www.aniseed.cnrs.fr/aniseed/gene/show_gene?unique_id=Cirobu.g00007576	http://ghost.zool.kyoto-u.ac.jp/cgi-bin/fordetailkh21.cgi?name=KH.C5.667;source=kh2013
KH.L116.47	WDR92	NUP43; SNRNP40; WDR92	Cirobu.g00010778	3.09995	0.984423	0.0939744	-0.338633	0.562236	0	https://www.aniseed.cnrs.fr/aniseed/gene/show_expression?unique_id=Cirobu.g00010778	https://www.aniseed.cnrs.fr/aniseed/gene/show_gene?unique_id=Cirobu.g00010778	http://ghost.zool.kyoto-u.ac.jp/cgi-bin/fordetailkh21.cgi?name=KH.L116.47;source=kh2013
KH.C10.112	KH2013:KH.C10.112	KH.C10.112	Cirobu.g00001308	1.47588	0.983639	0.310617	0.0868412	0.962983	0	https://www.aniseed.cnrs.fr/aniseed/gene/show_expression?unique_id=Cirobu.g00001308	https://www.aniseed.cnrs.fr/aniseed/gene/show_gene?unique_id=Cirobu.g00001308	http://ghost.zool.kyoto-u.ac.jp/cgi-bin/fordetailkh21.cgi?name=KH.C10.112;source=kh2013
KH.L61.8	SYCE2	SYCE2	Cirobu.g00012882	2.02676	0.98279	0.103347	-0.157506	0.802583	2	https://www.aniseed.cnrs.fr/aniseed/gene/show_expression?unique_id=Cirobu.g00012882	https://www.aniseed.cnrs.fr/aniseed/gene/show_gene?unique_id=Cirobu.g00012882	http://ghost.zool.kyoto-u.ac.jp/cgi-bin/fordetailkh21.cgi?name=KH.L61.8;source=kh2013
KH.C10.168	KH2013:KH.C10.168	PITPNA; PITPNC1; PITPNM2	Cirobu.g00001366	4.74209	0.982271	0.0251174	-0.620621	0.158168	0	https://www.aniseed.cnrs.fr/aniseed/gene/show_expression?unique_id=Cirobu.g00001366	https://www.aniseed.cnrs.fr/aniseed/gene/show_gene?unique_id=Cirobu.g00001366	http://ghost.zool.kyoto-u.ac.jp/cgi-bin/fordetailkh21.cgi?name=KH.C10.168;source=kh2013
KH.C9.89	KH2013:KH.C9.89	KH.C9.89	Cirobu.g00010479	0.947476	0.98188	0.226665	0.895319	0.268365	0	https://www.aniseed.cnrs.fr/aniseed/gene/show_expression?unique_id=Cirobu.g00010479	https://www.aniseed.cnrs.fr/aniseed/gene/show_gene?unique_id=Cirobu.g00010479	http://ghost.zool.kyoto-u.ac.jp/cgi-bin/fordetailkh21.cgi?name=KH.C9.89;source=kh2013
KH.L92.2	SC5DL	FAXDC2; MSMO1; SC5D	Cirobu.g00013298	4.75385	0.981047	0.0913271	-0.455001	0.438554	0	https://www.aniseed.cnrs.fr/aniseed/gene/show_expression?unique_id=Cirobu.g00013298	https://www.aniseed.cnrs.fr/aniseed/gene/show_gene?unique_id=Cirobu.g00013298	http://ghost.zool.kyoto-u.ac.jp/cgi-bin/fordetailkh21.cgi?name=KH.L92.2;source=kh2013
KH.S695.2	KH2013:KH.S695.2	KH.S695.2	Cirobu.g00014942	1.26144	0.979629	0.487301	-0.769727	0.591888	0	https://www.aniseed.cnrs.fr/aniseed/gene/show_expression?unique_id=Cirobu.g00014942	https://www.aniseed.cnrs.fr/aniseed/gene/show_gene?unique_id=Cirobu.g00014942	http://ghost.zool.kyoto-u.ac.jp/cgi-bin/fordetailkh21.cgi?name=KH.S695.2;source=kh2013
KH.C1.1300	MAK	ICK; MAK; MOK	Cirobu.g00000334	5.85514	0.979401	0.00698619	0.286174	0.43091	1	https://www.aniseed.cnrs.fr/aniseed/gene/show_expression?unique_id=Cirobu.g00000334	https://www.aniseed.cnrs.fr/aniseed/gene/show_gene?unique_id=Cirobu.g00000334	http://ghost.zool.kyoto-u.ac.jp/cgi-bin/fordetailkh21.cgi?name=KH.C1.1300;source=kh2013
KH.C12.463	KH2013:KH.C12.463	KH.C12.463	Cirobu.g00003019	1.4797	0.979132	0.257624	1.47998	0.0832419	0	https://www.aniseed.cnrs.fr/aniseed/gene/show_expression?unique_id=Cirobu.g00003019	https://www.aniseed.cnrs.fr/aniseed/gene/show_gene?unique_id=Cirobu.g00003019	http://ghost.zool.kyoto-u.ac.jp/cgi-bin/fordetailkh21.cgi?name=KH.C12.463;source=kh2013
KH.S1373.1	KIAA1199	PKHD1; PKHD1L1; TMEM2	Cirobu.g00013832	2.80902	0.978601	0.497108	-0.826654	0.563614	0	https://www.aniseed.cnrs.fr/aniseed/gene/show_expression?unique_id=Cirobu.g00013832	https://www.aniseed.cnrs.fr/aniseed/gene/show_gene?unique_id=Cirobu.g00013832	http://ghost.zool.kyoto-u.ac.jp/cgi-bin/fordetailkh21.cgi?name=KH.S1373.1;source=kh2013
KH.C1.1043	MTF1	MTF1; ZNF143; ZNF76	Cirobu.g00000051	5.28082	0.976778	0.0176158	-0.0300638	0.949201	11	https://www.aniseed.cnrs.fr/aniseed/gene/show_expression?unique_id=Cirobu.g00000051	https://www.aniseed.cnrs.fr/aniseed/gene/show_gene?unique_id=Cirobu.g00000051	http://ghost.zool.kyoto-u.ac.jp/cgi-bin/fordetailkh21.cgi?name=KH.C1.1043;source=kh2013
KH.C11.436	GALM	GALM	Cirobu.g00002269	1.22436	0.975729	0.241735	0.177417	0.853186	0	https://www.aniseed.cnrs.fr/aniseed/gene/show_expression?unique_id=Cirobu.g00002269	https://www.aniseed.cnrs.fr/aniseed/gene/show_gene?unique_id=Cirobu.g00002269	http://ghost.zool.kyoto-u.ac.jp/cgi-bin/fordetailkh21.cgi?name=KH.C11.436;source=kh2013
KH.L73.8	SLC39A4	SLC39A10; SLC39A12; SLC39A4	Cirobu.g00013050	2.44968	0.97416	0.111191	0.235878	0.717019	0	https://www.aniseed.cnrs.fr/aniseed/gene/show_expression?unique_id=Cirobu.g00013050	https://www.aniseed.cnrs.fr/aniseed/gene/show_gene?unique_id=Cirobu.g00013050	http://ghost.zool.kyoto-u.ac.jp/cgi-bin/fordetailkh21.cgi?name=KH.L73.8;source=kh2013
KH.L87.11	PHKG1/2	CAMK4; PHKG1; PHKG2	Cirobu.g00013172	6.74896	0.973011	0.00747504	-0.770067	0.0342544	6	https://www.aniseed.cnrs.fr/aniseed/gene/show_expression?unique_id=Cirobu.g00013172	https://www.aniseed.cnrs.fr/aniseed/gene/show_gene?unique_id=Cirobu.g00013172	http://ghost.zool.kyoto-u.ac.jp/cgi-bin/fordetailkh21.cgi?name=KH.L87.11;source=kh2013
KH.S1691.1	KH2013:KH.S1691.1_NPTX1/2	NPTX1; NPTX2; NPTXR	Cirobu.g00014031	2.49613	0.970734	0.771175	-0.0151437	0.997405	1	https://www.aniseed.cnrs.fr/aniseed/gene/show_expression?unique_id=Cirobu.g00014031	https://www.aniseed.cnrs.fr/aniseed/gene/show_gene?unique_id=Cirobu.g00014031	http://ghost.zool.kyoto-u.ac.jp/cgi-bin/fordetailkh21.cgi?name=KH.S1691.1;source=kh2013
KH.L170.53	TTC39B	TTC39A; TTC39B; TTC39C	Cirobu.g00011791	5.67067	0.970227	0.0161359	-0.419038	0.297355	0	https://www.aniseed.cnrs.fr/aniseed/gene/show_expression?unique_id=Cirobu.g00011791	https://www.aniseed.cnrs.fr/aniseed/gene/show_gene?unique_id=Cirobu.g00011791	http://ghost.zool.kyoto-u.ac.jp/cgi-bin/fordetailkh21.cgi?name=KH.L170.53;source=kh2013
KH.C1.992	KH2013:KH.C1.992	KH.C1.992	Cirobu.g00001286	2.53098	0.969015	0.0902091	0.0347828	0.971534	0	https://www.aniseed.cnrs.fr/aniseed/gene/show_expression?unique_id=Cirobu.g00001286	https://www.aniseed.cnrs.fr/aniseed/gene/show_gene?unique_id=Cirobu.g00001286	http://ghost.zool.kyoto-u.ac.jp/cgi-bin/fordetailkh21.cgi?name=KH.C1.992;source=kh2013
KH.S364.2	KH2013:KH.S364.2_STOM	NPHS2; STOM; STOML3	Cirobu.g00014363	4.60328	0.967926	0.118723	-0.0673637	0.911376	0	https://www.aniseed.cnrs.fr/aniseed/gene/show_expression?unique_id=Cirobu.g00014363	https://www.aniseed.cnrs.fr/aniseed/gene/show_gene?unique_id=Cirobu.g00014363	http://ghost.zool.kyoto-u.ac.jp/cgi-bin/fordetailkh21.cgi?name=KH.S364.2;source=kh2013
KH.C1.945	CCDC166	CCDC121; CCDC166	Cirobu.g00001234	0.823706	0.967459	0.251162	0.592874	0.486401	0	https://www.aniseed.cnrs.fr/aniseed/gene/show_expression?unique_id=Cirobu.g00001234	https://www.aniseed.cnrs.fr/aniseed/gene/show_gene?unique_id=Cirobu.g00001234	http://ghost.zool.kyoto-u.ac.jp/cgi-bin/fordetailkh21.cgi?name=KH.C1.945;source=kh2013
KH.C7.168	KH2013:KH.C7.168_KIF13B	CLIP2; CLIP3; KIF13B	Cirobu.g00007991	3.84977	0.966439	0.0399594	-0.535265	0.265529	1	https://www.aniseed.cnrs.fr/aniseed/gene/show_expression?unique_id=Cirobu.g00007991	https://www.aniseed.cnrs.fr/aniseed/gene/show_gene?unique_id=Cirobu.g00007991	http://ghost.zool.kyoto-u.ac.jp/cgi-bin/fordetailkh21.cgi?name=KH.C7.168;source=kh2013
KH.C12.334	WNT2	WNT2; WNT2B; WNT4	Cirobu.g00002880	2.86662	0.96494	0.13655	0.498352	0.455309	11	https://www.aniseed.cnrs.fr/aniseed/gene/show_expression?unique_id=Cirobu.g00002880	https://www.aniseed.cnrs.fr/aniseed/gene/show_gene?unique_id=Cirobu.g00002880	http://ghost.zool.kyoto-u.ac.jp/cgi-bin/fordetailkh21.cgi?name=KH.C12.334;source=kh2013
KH.C4.676	STON1/2	STON1; STON1-GTF2A1L; STON2	Cirobu.g00006788	6.38267	0.964189	0.0249008	-0.76621	0.075192	0	https://www.aniseed.cnrs.fr/aniseed/gene/show_expression?unique_id=Cirobu.g00006788	https://www.aniseed.cnrs.fr/aniseed/gene/show_gene?unique_id=Cirobu.g00006788	http://ghost.zool.kyoto-u.ac.jp/cgi-bin/fordetailkh21.cgi?name=KH.C4.676;source=kh2013
KH.C12.521	CALML6	CALM1; CALM3; CALML6	Cirobu.g00003084	1.77791	0.963659	0.243516	0.576455	0.493499	0	https://www.aniseed.cnrs.fr/aniseed/gene/show_expression?unique_id=Cirobu.g00003084	https://www.aniseed.cnrs.fr/aniseed/gene/show_gene?unique_id=Cirobu.g00003084	http://ghost.zool.kyoto-u.ac.jp/cgi-bin/fordetailkh21.cgi?name=KH.C12.521;source=kh2013
KH.C3.47	KH2013:KH.C3.47_VTI1A	VTI1A	Cirobu.g00005653	1.25205	0.963624	0.252527	-0.815803	0.358546	0	https://www.aniseed.cnrs.fr/aniseed/gene/show_expression?unique_id=Cirobu.g00005653	https://www.aniseed.cnrs.fr/aniseed/gene/show_gene?unique_id=Cirobu.g00005653	http://ghost.zool.kyoto-u.ac.jp/cgi-bin/fordetailkh21.cgi?name=KH.C3.47;source=kh2013
KH.C10.353	HS1BP3	HS1BP3	Cirobu.g00001567	0.614673	0.962389	0.242262	0.0782523	0.959415	0	https://www.aniseed.cnrs.fr/aniseed/gene/show_expression?unique_id=Cirobu.g00001567	https://www.aniseed.cnrs.fr/aniseed/gene/show_gene?unique_id=Cirobu.g00001567	http://ghost.zool.kyoto-u.ac.jp/cgi-bin/fordetailkh21.cgi?name=KH.C10.353;source=kh2013
KH.L108.26	KH2013:KH.L108.26	KH.L108.26	Cirobu.g00010620	2.38612	0.961919	0.142894	-0.415415	0.52317	0	https://www.aniseed.cnrs.fr/aniseed/gene/show_expression?unique_id=Cirobu.g00010620	https://www.aniseed.cnrs.fr/aniseed/gene/show_gene?unique_id=Cirobu.g00010620	http://ghost.zool.kyoto-u.ac.jp/cgi-bin/fordetailkh21.cgi?name=KH.L108.26;source=kh2013
KH.L44.2	CAMKK1/2	CAMKK1; CAMKK2; PRKAA1	Cirobu.g00012660	5.08516	0.961851	0.0315977	-0.294455	0.51207	2	https://www.aniseed.cnrs.fr/aniseed/gene/show_expression?unique_id=Cirobu.g00012660	https://www.aniseed.cnrs.fr/aniseed/gene/show_gene?unique_id=Cirobu.g00012660	http://ghost.zool.kyoto-u.ac.jp/cgi-bin/fordetailkh21.cgi?name=KH.L44.2;source=kh2013
KH.C12.101	KH2013:KH.C12.101_GBP1/2/3/4/5/6/7	ATL1; ATL2; ATL3	Cirobu.g00002625	3.36236	0.959745	0.261777	0.19859	0.823702	1	https://www.aniseed.cnrs.fr/aniseed/gene/show_expression?unique_id=Cirobu.g00002625	https://www.aniseed.cnrs.fr/aniseed/gene/show_gene?unique_id=Cirobu.g00002625	http://ghost.zool.kyoto-u.ac.jp/cgi-bin/fordetailkh21.cgi?name=KH.C12.101;source=kh2013
KH.C2.629	KH2013:KH.C2.629_FAM167A	FAM167A; FAM167B	Cirobu.g00004847	-0.1691	0.957869	0.309534	-1.86135	0.0618382	0	https://www.aniseed.cnrs.fr/aniseed/gene/show_expression?unique_id=Cirobu.g00004847	https://www.aniseed.cnrs.fr/aniseed/gene/show_gene?unique_id=Cirobu.g00004847	http://ghost.zool.kyoto-u.ac.jp/cgi-bin/fordetailkh21.cgi?name=KH.C2.629;source=kh2013
KH.C4.761	KH2013:KH.C4.761_ADH1/2/3/5	ADH1A; ADH1B; ADH1C	Cirobu.g00006882	2.6375	0.957456	0.288963	0.442393	0.630597	0	https://www.aniseed.cnrs.fr/aniseed/gene/show_expression?unique_id=Cirobu.g00006882	https://www.aniseed.cnrs.fr/aniseed/gene/show_gene?unique_id=Cirobu.g00006882	http://ghost.zool.kyoto-u.ac.jp/cgi-bin/fordetailkh21.cgi?name=KH.C4.761;source=kh2013
KH.S1066.5	MUC19	FRAS1; KCP; MUC5B	Cirobu.g00013563	1.90834	0.957173	0.13937	-0.545889	0.400615	0	https://www.aniseed.cnrs.fr/aniseed/gene/show_expression?unique_id=Cirobu.g00013563	https://www.aniseed.cnrs.fr/aniseed/gene/show_gene?unique_id=Cirobu.g00013563	http://ghost.zool.kyoto-u.ac.jp/cgi-bin/fordetailkh21.cgi?name=KH.S1066.5;source=kh2013
KH.C5.592	KH2013:KH.C5.592_MGAT4B	MGAT4A; MGAT4B; MGAT4D	Cirobu.g00007493	6.43476	0.954453	0.00971229	-0.539701	0.143872	0	https://www.aniseed.cnrs.fr/aniseed/gene/show_expression?unique_id=Cirobu.g00007493	https://www.aniseed.cnrs.fr/aniseed/gene/show_gene?unique_id=Cirobu.g00007493	http://ghost.zool.kyoto-u.ac.jp/cgi-bin/fordetailkh21.cgi?name=KH.C5.592;source=kh2013
KH.S256.14	KH2013:KH.S256.14	KH.S256.14	Cirobu.g00014273	0.365627	0.954028	0.408331	1.34464	0.245642	0	https://www.aniseed.cnrs.fr/aniseed/gene/show_expression?unique_id=Cirobu.g00014273	https://www.aniseed.cnrs.fr/aniseed/gene/show_gene?unique_id=Cirobu.g00014273	http://ghost.zool.kyoto-u.ac.jp/cgi-bin/fordetailkh21.cgi?name=KH.S256.14;source=kh2013
KH.C12.410	KH2013:KH.C12.410	KH.C12.410	Cirobu.g00002964	0.794221	0.95393	0.226797	0.0357241	1	0	https://www.aniseed.cnrs.fr/aniseed/gene/show_expression?unique_id=Cirobu.g00002964	https://www.aniseed.cnrs.fr/aniseed/gene/show_gene?unique_id=Cirobu.g00002964	http://ghost.zool.kyoto-u.ac.jp/cgi-bin/fordetailkh21.cgi?name=KH.C12.410;source=kh2013
KH.C3.55	KH2013:KH.C3.55	KH.C3.55	Cirobu.g00005738	1.23746	0.953422	0.401918	-1.41116	0.222308	0	https://www.aniseed.cnrs.fr/aniseed/gene/show_expression?unique_id=Cirobu.g00005738	https://www.aniseed.cnrs.fr/aniseed/gene/show_gene?unique_id=Cirobu.g00005738	http://ghost.zool.kyoto-u.ac.jp/cgi-bin/fordetailkh21.cgi?name=KH.C3.55;source=kh2013
KH.S683.1	KH2013:KH.S683.1_DCBLD1/2	DCBLD1; DCBLD2; F8	Cirobu.g00014926	1.5337	0.952906	0.314828	0.762608	0.424231	0	https://www.aniseed.cnrs.fr/aniseed/gene/show_expression?unique_id=Cirobu.g00014926	https://www.aniseed.cnrs.fr/aniseed/gene/show_gene?unique_id=Cirobu.g00014926	http://ghost.zool.kyoto-u.ac.jp/cgi-bin/fordetailkh21.cgi?name=KH.S683.1;source=kh2013
KH.C3.801	KH2013:KH.C3.801_TRPA-1	ANK1; ANKRD50; TRPA1	Cirobu.g00006008	3.85116	0.952527	0.332408	-0.277082	0.77514	1	https://www.aniseed.cnrs.fr/aniseed/gene/show_expression?unique_id=Cirobu.g00006008	https://www.aniseed.cnrs.fr/aniseed/gene/show_gene?unique_id=Cirobu.g00006008	http://ghost.zool.kyoto-u.ac.jp/cgi-bin/fordetailkh21.cgi?name=KH.C3.801;source=kh2013
KH.C1.546	FBXL2/20	FBXL2; FBXL20; FBXL7	Cirobu.g00000795	5.47353	0.952259	0.00731406	0.156371	0.661578	2	https://www.aniseed.cnrs.fr/aniseed/gene/show_expression?unique_id=Cirobu.g00000795	https://www.aniseed.cnrs.fr/aniseed/gene/show_gene?unique_id=Cirobu.g00000795	http://ghost.zool.kyoto-u.ac.jp/cgi-bin/fordetailkh21.cgi?name=KH.C1.546;source=kh2013
KH.C4.652	KH2013:KH.C4.652	KH.C4.652	Cirobu.g00006762	1.7403	0.951828	0.351627	1.71699	0.0944106	0	https://www.aniseed.cnrs.fr/aniseed/gene/show_expression?unique_id=Cirobu.g00006762	https://www.aniseed.cnrs.fr/aniseed/gene/show_gene?unique_id=Cirobu.g00006762	http://ghost.zool.kyoto-u.ac.jp/cgi-bin/fordetailkh21.cgi?name=KH.C4.652;source=kh2013
KH.L153.41	KH2013:KH.L153.41	KH.L153.41	Cirobu.g00011491	0.860333	0.949983	0.419625	1.52787	0.180824	1	https://www.aniseed.cnrs.fr/aniseed/gene/show_expression?unique_id=Cirobu.g00011491	https://www.aniseed.cnrs.fr/aniseed/gene/show_gene?unique_id=Cirobu.g00011491	http://ghost.zool.kyoto-u.ac.jp/cgi-bin/fordetailkh21.cgi?name=KH.L153.41;source=kh2013
KH.L134.22	PIP4K2B	PIP4K2A; PIP4K2B	Cirobu.g00011087	4.71186	0.94949	0.0454252	-0.314187	0.508386	3	https://www.aniseed.cnrs.fr/aniseed/gene/show_expression?unique_id=Cirobu.g00011087	https://www.aniseed.cnrs.fr/aniseed/gene/show_gene?unique_id=Cirobu.g00011087	http://ghost.zool.kyoto-u.ac.jp/cgi-bin/fordetailkh21.cgi?name=KH.L134.22;source=kh2013
KH.C3.966	KH2013:KH.C3.966	KH.C3.966	Cirobu.g00006156	0.922391	0.948055	0.398998	-2.7161	0.0409524	0	https://www.aniseed.cnrs.fr/aniseed/gene/show_expression?unique_id=Cirobu.g00006156	https://www.aniseed.cnrs.fr/aniseed/gene/show_gene?unique_id=Cirobu.g00006156	http://ghost.zool.kyoto-u.ac.jp/cgi-bin/fordetailkh21.cgi?name=KH.C3.966;source=kh2013
KH.C3.799	KH2013:KH.C3.799	KH.C3.799	Cirobu.g00006004	2.67086	0.947889	0.0739201	0.0918617	0.876538	0	https://www.aniseed.cnrs.fr/aniseed/gene/show_expression?unique_id=Cirobu.g00006004	https://www.aniseed.cnrs.fr/aniseed/gene/show_gene?unique_id=Cirobu.g00006004	http://ghost.zool.kyoto-u.ac.jp/cgi-bin/fordetailkh21.cgi?name=KH.C3.799;source=kh2013
KH.C10.531	KH2013:KH.C10.531_KCNK10/2/4	KCNK10; KCNK2; KCNK4	Cirobu.g00001759	6.47508	0.946664	0.00759306	-0.114619	0.748981	4	https://www.aniseed.cnrs.fr/aniseed/gene/show_expression?unique_id=Cirobu.g00001759	https://www.aniseed.cnrs.fr/aniseed/gene/show_gene?unique_id=Cirobu.g00001759	http://ghost.zool.kyoto-u.ac.jp/cgi-bin/fordetailkh21.cgi?name=KH.C10.531;source=kh2013
KH.C8.775	BTB-17	KLHL13	Cirobu.g00009442	4.65966	0.946408	0.0749799	-0.740909	0.163882	3	https://www.aniseed.cnrs.fr/aniseed/gene/show_expression?unique_id=Cirobu.g00009442	https://www.aniseed.cnrs.fr/aniseed/gene/show_gene?unique_id=Cirobu.g00009442	http://ghost.zool.kyoto-u.ac.jp/cgi-bin/fordetailkh21.cgi?name=KH.C8.775;source=kh2013
KH.L169.3	KH2013:KH.L169.3_SLC17A5	SLC17A5; SLC17A6; SLC17A8	Cirobu.g00011725	1.72925	0.946131	0.166426	-0.0759222	0.956908	0	https://www.aniseed.cnrs.fr/aniseed/gene/show_expression?unique_id=Cirobu.g00011725	https://www.aniseed.cnrs.fr/aniseed/gene/show_gene?unique_id=Cirobu.g00011725	http://ghost.zool.kyoto-u.ac.jp/cgi-bin/fordetailkh21.cgi?name=KH.L169.3;source=kh2013
KH.C2.1145	KH2013:KH.C2.1145	KH.C2.1145	Cirobu.g00004274	2.30739	0.945728	0.181583	0.464025	0.518948	0	https://www.aniseed.cnrs.fr/aniseed/gene/show_expression?unique_id=Cirobu.g00004274	https://www.aniseed.cnrs.fr/aniseed/gene/show_gene?unique_id=Cirobu.g00004274	http://ghost.zool.kyoto-u.ac.jp/cgi-bin/fordetailkh21.cgi?name=KH.C2.1145;source=kh2013
KH.C4.341	KH2013:KH.C4.341_FOXN1	FOXA2; FOXB1; FOXB2	Cirobu.g00006425	5.44017	0.945573	0.222865	0.046603	0.951389	50	https://www.aniseed.cnrs.fr/aniseed/gene/show_expression?unique_id=Cirobu.g00006425	https://www.aniseed.cnrs.fr/aniseed/gene/show_gene?unique_id=Cirobu.g00006425	http://ghost.zool.kyoto-u.ac.jp/cgi-bin/fordetailkh21.cgi?name=KH.C4.341;source=kh2013
KH.C1.698	KH2013:KH.C1.698	SLC35G1	Cirobu.g00000961	0.787043	0.945543	0.333573	-0.474511	0.686984	0	https://www.aniseed.cnrs.fr/aniseed/gene/show_expression?unique_id=Cirobu.g00000961	https://www.aniseed.cnrs.fr/aniseed/gene/show_gene?unique_id=Cirobu.g00000961	http://ghost.zool.kyoto-u.ac.jp/cgi-bin/fordetailkh21.cgi?name=KH.C1.698;source=kh2013
KH.C2.765	RIMS1/2	PCLO; RIMS1; RIMS2	Cirobu.g00004993	5.2099	0.945382	0.0357814	-0.174135	0.698876	0	https://www.aniseed.cnrs.fr/aniseed/gene/show_expression?unique_id=Cirobu.g00004993	https://www.aniseed.cnrs.fr/aniseed/gene/show_gene?unique_id=Cirobu.g00004993	http://ghost.zool.kyoto-u.ac.jp/cgi-bin/fordetailkh21.cgi?name=KH.C2.765;source=kh2013
KH.C1.553	OLFM2/3	OLFM2; OLFM3; OLFML2B	Cirobu.g00000803	5.80535	0.945303	0.175454	0.436725	0.53	0	https://www.aniseed.cnrs.fr/aniseed/gene/show_expression?unique_id=Cirobu.g00000803	https://www.aniseed.cnrs.fr/aniseed/gene/show_gene?unique_id=Cirobu.g00000803	http://ghost.zool.kyoto-u.ac.jp/cgi-bin/fordetailkh21.cgi?name=KH.C1.553;source=kh2013
KH.C3.42	KH2013:KH.C3.42	KH.C3.42	Cirobu.g00005598	0.842533	0.944146	0.18633	0.876079	0.232967	0	https://www.aniseed.cnrs.fr/aniseed/gene/show_expression?unique_id=Cirobu.g00005598	https://www.aniseed.cnrs.fr/aniseed/gene/show_gene?unique_id=Cirobu.g00005598	http://ghost.zool.kyoto-u.ac.jp/cgi-bin/fordetailkh21.cgi?name=KH.C3.42;source=kh2013
KH.C2.554	KH2013:KH.C2.554_SRD5A3	SRD5A1; SRD5A2; SRD5A3	Cirobu.g00004764	0.629882	0.943121	0.26512	-2.80245	0.0052263	0	https://www.aniseed.cnrs.fr/aniseed/gene/show_expression?unique_id=Cirobu.g00004764	https://www.aniseed.cnrs.fr/aniseed/gene/show_gene?unique_id=Cirobu.g00004764	http://ghost.zool.kyoto-u.ac.jp/cgi-bin/fordetailkh21.cgi?name=KH.C2.554;source=kh2013
KH.C2.96	KH2013:KH.C2.96	KH.C2.96	Cirobu.g00005206	0.558779	0.9401	0.507284	-0.647044	0.653678	0	https://www.aniseed.cnrs.fr/aniseed/gene/show_expression?unique_id=Cirobu.g00005206	https://www.aniseed.cnrs.fr/aniseed/gene/show_gene?unique_id=Cirobu.g00005206	http://ghost.zool.kyoto-u.ac.jp/cgi-bin/fordetailkh21.cgi?name=KH.C2.96;source=kh2013
KH.C1.652	KH2013:KH.C1.652_GRIA2/3/4	GRID1; GRID2; GRIK2	Cirobu.g00000911	1.11842	0.939494	0.31933	-0.515794	0.597757	0	https://www.aniseed.cnrs.fr/aniseed/gene/show_expression?unique_id=Cirobu.g00000911	https://www.aniseed.cnrs.fr/aniseed/gene/show_gene?unique_id=Cirobu.g00000911	http://ghost.zool.kyoto-u.ac.jp/cgi-bin/fordetailkh21.cgi?name=KH.C1.652;source=kh2013
KH.L95.17	ZFP1/12/13/14/28/30/39/61/68/69/7/78/81/82/84/9/90/92/93/94	PRDM14; PRDM4; PRDM9	Cirobu.g00013323	0.495884	0.93932	0.242186	-0.748478	0.378879	9	https://www.aniseed.cnrs.fr/aniseed/gene/show_expression?unique_id=Cirobu.g00013323	https://www.aniseed.cnrs.fr/aniseed/gene/show_gene?unique_id=Cirobu.g00013323	http://ghost.zool.kyoto-u.ac.jp/cgi-bin/fordetailkh21.cgi?name=KH.L95.17;source=kh2013
KH.C6.300	SCARA3	CD207; COLEC12; FCER2	Cirobu.g00007834	1.43009	0.939236	0.26389	-0.19054	0.845136	0	https://www.aniseed.cnrs.fr/aniseed/gene/show_expression?unique_id=Cirobu.g00007834	https://www.aniseed.cnrs.fr/aniseed/gene/show_gene?unique_id=Cirobu.g00007834	http://ghost.zool.kyoto-u.ac.jp/cgi-bin/fordetailkh21.cgi?name=KH.C6.300;source=kh2013
KH.C1.923	C1ORF109	C1orf109	Cirobu.g00001211	0.492906	0.937879	0.219444	0.447766	0.578537	2	https://www.aniseed.cnrs.fr/aniseed/gene/show_expression?unique_id=Cirobu.g00001211	https://www.aniseed.cnrs.fr/aniseed/gene/show_gene?unique_id=Cirobu.g00001211	http://ghost.zool.kyoto-u.ac.jp/cgi-bin/fordetailkh21.cgi?name=KH.C1.923;source=kh2013
KH.C11.195	FAM92A/1	FAM92A; FAM92B	Cirobu.g00002008	2.61648	0.937595	0.130086	0.0144239	1	0	https://www.aniseed.cnrs.fr/aniseed/gene/show_expression?unique_id=Cirobu.g00002008	https://www.aniseed.cnrs.fr/aniseed/gene/show_gene?unique_id=Cirobu.g00002008	http://ghost.zool.kyoto-u.ac.jp/cgi-bin/fordetailkh21.cgi?name=KH.C11.195;source=kh2013
KH.C1.110	PUF60/68	PABPC1L2A; PUF60	Cirobu.g00000114	3.97918	0.937247	0.0371147	-0.181366	0.697123	0	https://www.aniseed.cnrs.fr/aniseed/gene/show_expression?unique_id=Cirobu.g00000114	https://www.aniseed.cnrs.fr/aniseed/gene/show_gene?unique_id=Cirobu.g00000114	http://ghost.zool.kyoto-u.ac.jp/cgi-bin/fordetailkh21.cgi?name=KH.C1.110;source=kh2013
KH.S691.2	KH2013:KH.S691.2_GABBR2	GABBR1; GABBR2; GPR156	Cirobu.g00014933	2.64299	0.936746	0.512322	-0.39559	0.777862	0	https://www.aniseed.cnrs.fr/aniseed/gene/show_expression?unique_id=Cirobu.g00014933	https://www.aniseed.cnrs.fr/aniseed/gene/show_gene?unique_id=Cirobu.g00014933	http://ghost.zool.kyoto-u.ac.jp/cgi-bin/fordetailkh21.cgi?name=KH.S691.2;source=kh2013
KH.C1.803	PAQR6/9	ADIPOR2; PAQR5; PAQR9	Cirobu.g00001078	5.33518	0.93498	0.00801749	0.105644	0.768883	0	https://www.aniseed.cnrs.fr/aniseed/gene/show_expression?unique_id=Cirobu.g00001078	https://www.aniseed.cnrs.fr/aniseed/gene/show_gene?unique_id=Cirobu.g00001078	http://ghost.zool.kyoto-u.ac.jp/cgi-bin/fordetailkh21.cgi?name=KH.C1.803;source=kh2013
KH.S1042.4	KH2013:KH.S1042.4	KH.S1042.4	Cirobu.g00013537	3.54904	0.933987	0.143138	-0.208509	0.744378	0	https://www.aniseed.cnrs.fr/aniseed/gene/show_expression?unique_id=Cirobu.g00013537	https://www.aniseed.cnrs.fr/aniseed/gene/show_gene?unique_id=Cirobu.g00013537	http://ghost.zool.kyoto-u.ac.jp/cgi-bin/fordetailkh21.cgi?name=KH.S1042.4;source=kh2013
KH.C6.217	CHST13	CHST10; CHST11; CHST13	Cirobu.g00007742	1.65145	0.932525	0.559151	3.02801	0.0653674	0	https://www.aniseed.cnrs.fr/aniseed/gene/show_expression?unique_id=Cirobu.g00007742	https://www.aniseed.cnrs.fr/aniseed/gene/show_gene?unique_id=Cirobu.g00007742	http://ghost.zool.kyoto-u.ac.jp/cgi-bin/fordetailkh21.cgi?name=KH.C6.217;source=kh2013
KH.C9.691	FTSJD2	CMTR1; CMTR2	Cirobu.g00010262	1.96013	0.931726	0.19554	-0.0957466	0.896128	0	https://www.aniseed.cnrs.fr/aniseed/gene/show_expression?unique_id=Cirobu.g00010262	https://www.aniseed.cnrs.fr/aniseed/gene/show_gene?unique_id=Cirobu.g00010262	http://ghost.zool.kyoto-u.ac.jp/cgi-bin/fordetailkh21.cgi?name=KH.C9.691;source=kh2013
KH.C10.497	KH2013:KH.C10.497	KH.C10.497	Cirobu.g00001721	0.654848	0.931089	0.233813	0.785237	0.340875	0	https://www.aniseed.cnrs.fr/aniseed/gene/show_expression?unique_id=Cirobu.g00001721	https://www.aniseed.cnrs.fr/aniseed/gene/show_gene?unique_id=Cirobu.g00001721	http://ghost.zool.kyoto-u.ac.jp/cgi-bin/fordetailkh21.cgi?name=KH.C10.497;source=kh2013
KH.C3.40	KH2013:KH.C3.40_WDR90	EML5; EML6; WDR90	Cirobu.g00005577	7.11256	0.930707	0.00792564	-0.18352	0.598238	5	https://www.aniseed.cnrs.fr/aniseed/gene/show_expression?unique_id=Cirobu.g00005577	https://www.aniseed.cnrs.fr/aniseed/gene/show_gene?unique_id=Cirobu.g00005577	http://ghost.zool.kyoto-u.ac.jp/cgi-bin/fordetailkh21.cgi?name=KH.C3.40;source=kh2013
KH.C9.60	KH2013:KH.C9.60	KH.C9.60	Cirobu.g00010162	1.87342	0.930276	0.128933	-0.929606	0.14193	0	https://www.aniseed.cnrs.fr/aniseed/gene/show_expression?unique_id=Cirobu.g00010162	https://www.aniseed.cnrs.fr/aniseed/gene/show_gene?unique_id=Cirobu.g00010162	http://ghost.zool.kyoto-u.ac.jp/cgi-bin/fordetailkh21.cgi?name=KH.C9.60;source=kh2013
KH.S654.3	KH2013:KH.S654.3_DOC1/2/3	TBX2; TBX4; TBX6	Cirobu.g00014873	0.350094	0.930189	0.488562	-0.508276	0.74772	101	https://www.aniseed.cnrs.fr/aniseed/gene/show_expression?unique_id=Cirobu.g00014873	https://www.aniseed.cnrs.fr/aniseed/gene/show_gene?unique_id=Cirobu.g00014873	http://ghost.zool.kyoto-u.ac.jp/cgi-bin/fordetailkh21.cgi?name=KH.S654.3;source=kh2013
KH.S1034.1	KH2013:KH.S1034.1_PIPOX	PIPOX	Cirobu.g00013518	1.48313	0.928343	0.249245	-0.0789973	0.912541	0	https://www.aniseed.cnrs.fr/aniseed/gene/show_expression?unique_id=Cirobu.g00013518	https://www.aniseed.cnrs.fr/aniseed/gene/show_gene?unique_id=Cirobu.g00013518	http://ghost.zool.kyoto-u.ac.jp/cgi-bin/fordetailkh21.cgi?name=KH.S1034.1;source=kh2013
KH.L28.3	KH2013:KH.L28.3_VHL	VHL	Cirobu.g00012268	3.81092	0.927813	0.0514861	0.0207487	0.958482	0	https://www.aniseed.cnrs.fr/aniseed/gene/show_expression?unique_id=Cirobu.g00012268	https://www.aniseed.cnrs.fr/aniseed/gene/show_gene?unique_id=Cirobu.g00012268	http://ghost.zool.kyoto-u.ac.jp/cgi-bin/fordetailkh21.cgi?name=KH.L28.3;source=kh2013
KH.C8.660	KH2013:KH.C8.660	KH.C8.660	Cirobu.g00009315	4.41025	0.927684	0.0514953	-0.91022	0.0569117	3	https://www.aniseed.cnrs.fr/aniseed/gene/show_expression?unique_id=Cirobu.g00009315	https://www.aniseed.cnrs.fr/aniseed/gene/show_gene?unique_id=Cirobu.g00009315	http://ghost.zool.kyoto-u.ac.jp/cgi-bin/fordetailkh21.cgi?name=KH.C8.660;source=kh2013
KH.C12.447	KH2013:KH.C12.447	KH.C12.447	Cirobu.g00003002	0.84875	0.927084	0.211923	0.480431	0.522613	0	https://www.aniseed.cnrs.fr/aniseed/gene/show_expression?unique_id=Cirobu.g00003002	https://www.aniseed.cnrs.fr/aniseed/gene/show_gene?unique_id=Cirobu.g00003002	http://ghost.zool.kyoto-u.ac.jp/cgi-bin/fordetailkh21.cgi?name=KH.C12.447;source=kh2013
KH.C9.752	KH2013:KH.C9.752_JMJD5	HSPBAP1; JMJD7; KDM8	Cirobu.g00010330	0.735641	0.926691	0.43627	1.82657	0.128109	0	https://www.aniseed.cnrs.fr/aniseed/gene/show_expression?unique_id=Cirobu.g00010330	https://www.aniseed.cnrs.fr/aniseed/gene/show_gene?unique_id=Cirobu.g00010330	http://ghost.zool.kyoto-u.ac.jp/cgi-bin/fordetailkh21.cgi?name=KH.C9.752;source=kh2013
KH.S546.7	ACOT10/9	ACOT11; ACOT7; ACOT9	Cirobu.g00014671	4.37471	0.926687	0.0221537	0.12881	0.760522	0	https://www.aniseed.cnrs.fr/aniseed/gene/show_expression?unique_id=Cirobu.g00014671	https://www.aniseed.cnrs.fr/aniseed/gene/show_gene?unique_id=Cirobu.g00014671	http://ghost.zool.kyoto-u.ac.jp/cgi-bin/fordetailkh21.cgi?name=KH.S546.7;source=kh2013
KH.C9.239	KH2013:KH.C9.239	KH.C9.239	Cirobu.g00009766	5.50708	0.924328	0.0948142	-0.693087	0.209274	4	https://www.aniseed.cnrs.fr/aniseed/gene/show_expression?unique_id=Cirobu.g00009766	https://www.aniseed.cnrs.fr/aniseed/gene/show_gene?unique_id=Cirobu.g00009766	http://ghost.zool.kyoto-u.ac.jp/cgi-bin/fordetailkh21.cgi?name=KH.C9.239;source=kh2013
KH.C8.159	CG12061	SLC8A1; SLC8A2; SLC8A3	Cirobu.g00008767	6.47211	0.924181	0.0894006	0.310804	0.566756	0	https://www.aniseed.cnrs.fr/aniseed/gene/show_expression?unique_id=Cirobu.g00008767	https://www.aniseed.cnrs.fr/aniseed/gene/show_gene?unique_id=Cirobu.g00008767	http://ghost.zool.kyoto-u.ac.jp/cgi-bin/fordetailkh21.cgi?name=KH.C8.159;source=kh2013
KH.C10.288	RIC3	RIC3	Cirobu.g00001498	5.75261	0.923768	0.0166306	-0.0728917	0.855294	7	https://www.aniseed.cnrs.fr/aniseed/gene/show_expression?unique_id=Cirobu.g00001498	https://www.aniseed.cnrs.fr/aniseed/gene/show_gene?unique_id=Cirobu.g00001498	http://ghost.zool.kyoto-u.ac.jp/cgi-bin/fordetailkh21.cgi?name=KH.C10.288;source=kh2013
KH.S404.12	KH2013:KH.S404.12_HSP-16.1/11/2/41/48/49	CRYAA2; CRYAB; HSPB6	Cirobu.g00014438	2.61213	0.923297	0.632264	1.20913	0.533425	0	https://www.aniseed.cnrs.fr/aniseed/gene/show_expression?unique_id=Cirobu.g00014438	https://www.aniseed.cnrs.fr/aniseed/gene/show_gene?unique_id=Cirobu.g00014438	http://ghost.zool.kyoto-u.ac.jp/cgi-bin/fordetailkh21.cgi?name=KH.S404.12;source=kh2013
KH.C1.70	OSBPL5/8	OSBPL11; OSBPL5; OSBPL8	Cirobu.g00000964	7.22935	0.922873	0.011947	-1.02481	0.0054535	4	https://www.aniseed.cnrs.fr/aniseed/gene/show_expression?unique_id=Cirobu.g00000964	https://www.aniseed.cnrs.fr/aniseed/gene/show_gene?unique_id=Cirobu.g00000964	http://ghost.zool.kyoto-u.ac.jp/cgi-bin/fordetailkh21.cgi?name=KH.C1.70;source=kh2013
KH.S1203.1	THA1	KH.S1203.1	Cirobu.g00013698	1.70405	0.922733	0.244024	0.092815	0.926275	0	https://www.aniseed.cnrs.fr/aniseed/gene/show_expression?unique_id=Cirobu.g00013698	https://www.aniseed.cnrs.fr/aniseed/gene/show_gene?unique_id=Cirobu.g00013698	http://ghost.zool.kyoto-u.ac.jp/cgi-bin/fordetailkh21.cgi?name=KH.S1203.1;source=kh2013
KH.C11.307	KH2013:KH.C11.307_AADACL2/3/4	AADAC; AADACL3; AADACL4	Cirobu.g00002129	0.750691	0.921781	0.241417	0.854123	0.282938	0	https://www.aniseed.cnrs.fr/aniseed/gene/show_expression?unique_id=Cirobu.g00002129	https://www.aniseed.cnrs.fr/aniseed/gene/show_gene?unique_id=Cirobu.g00002129	http://ghost.zool.kyoto-u.ac.jp/cgi-bin/fordetailkh21.cgi?name=KH.C11.307;source=kh2013
KH.C7.149	F49C12.1/12	RNASEK; RNASEK-C17orf49	Cirobu.g00007970	7.11018	0.921203	0.0134585	0.200175	0.58889	10	https://www.aniseed.cnrs.fr/aniseed/gene/show_expression?unique_id=Cirobu.g00007970	https://www.aniseed.cnrs.fr/aniseed/gene/show_gene?unique_id=Cirobu.g00007970	http://ghost.zool.kyoto-u.ac.jp/cgi-bin/fordetailkh21.cgi?name=KH.C7.149;source=kh2013
KH.C9.124	KH2013:KH.C9.124_PRPS1/2	PRPS1; PRPS1L1; PRPS2	Cirobu.g00009640	6.80754	0.919755	0.0137335	0.0510644	0.892739	0	https://www.aniseed.cnrs.fr/aniseed/gene/show_expression?unique_id=Cirobu.g00009640	https://www.aniseed.cnrs.fr/aniseed/gene/show_gene?unique_id=Cirobu.g00009640	http://ghost.zool.kyoto-u.ac.jp/cgi-bin/fordetailkh21.cgi?name=KH.C9.124;source=kh2013
KH.C2.203	EFCAB4BB	CRACR2A; RAB44; RASEF	Cirobu.g00004380	4.93947	0.919275	0.0437941	0.257645	0.569961	0	https://www.aniseed.cnrs.fr/aniseed/gene/show_expression?unique_id=Cirobu.g00004380	https://www.aniseed.cnrs.fr/aniseed/gene/show_gene?unique_id=Cirobu.g00004380	http://ghost.zool.kyoto-u.ac.jp/cgi-bin/fordetailkh21.cgi?name=KH.C2.203;source=kh2013
KH.C8.501	KH2013:KH.C8.501_MGAT5	MGAT5; MGAT5B	Cirobu.g00009142	5.82299	0.918086	0.109092	-0.995616	0.0837765	0	https://www.aniseed.cnrs.fr/aniseed/gene/show_expression?unique_id=Cirobu.g00009142	https://www.aniseed.cnrs.fr/aniseed/gene/show_gene?unique_id=Cirobu.g00009142	http://ghost.zool.kyoto-u.ac.jp/cgi-bin/fordetailkh21.cgi?name=KH.C8.501;source=kh2013
KH.L147.11	SGSM1/2	SGSM1; SGSM2; TBC1D15	Cirobu.g00011290	5.67111	0.917347	0.195577	-1.4724	0.0403157	0	https://www.aniseed.cnrs.fr/aniseed/gene/show_expression?unique_id=Cirobu.g00011290	https://www.aniseed.cnrs.fr/aniseed/gene/show_gene?unique_id=Cirobu.g00011290	http://ghost.zool.kyoto-u.ac.jp/cgi-bin/fordetailkh21.cgi?name=KH.L147.11;source=kh2013
KH.S1526.1	RIMS1/3/4	RIMS1; RIMS2; RIMS3	Cirobu.g00013928	4.52779	0.917171	0.0772164	-0.259659	0.612669	0	https://www.aniseed.cnrs.fr/aniseed/gene/show_expression?unique_id=Cirobu.g00013928	https://www.aniseed.cnrs.fr/aniseed/gene/show_gene?unique_id=Cirobu.g00013928	http://ghost.zool.kyoto-u.ac.jp/cgi-bin/fordetailkh21.cgi?name=KH.S1526.1;source=kh2013
KH.C11.633	KH2013:KH.C11.633	KH.C11.633	Cirobu.g00002483	3.23223	0.916738	0.470887	0.343147	0.789534	0	https://www.aniseed.cnrs.fr/aniseed/gene/show_expression?unique_id=Cirobu.g00002483	https://www.aniseed.cnrs.fr/aniseed/gene/show_gene?unique_id=Cirobu.g00002483	http://ghost.zool.kyoto-u.ac.jp/cgi-bin/fordetailkh21.cgi?name=KH.C11.633;source=kh2013
KH.C4.124	KH2013:KH.C4.124_C14ORF135	PCNX2; PCNX3; PCNX4	Cirobu.g00006190	2.90487	0.91647	0.137526	0.151584	0.82351	0	https://www.aniseed.cnrs.fr/aniseed/gene/show_expression?unique_id=Cirobu.g00006190	https://www.aniseed.cnrs.fr/aniseed/gene/show_gene?unique_id=Cirobu.g00006190	http://ghost.zool.kyoto-u.ac.jp/cgi-bin/fordetailkh21.cgi?name=KH.C4.124;source=kh2013
KH.S404.8	KH2013:KH.S404.8_HSP-16.1/11/2/41/48/49	CRYAA2; CRYAB; HSPB6	Cirobu.g00014445	2.17298	0.915106	0.55777	1.19348	0.445334	0	https://www.aniseed.cnrs.fr/aniseed/gene/show_expression?unique_id=Cirobu.g00014445	https://www.aniseed.cnrs.fr/aniseed/gene/show_gene?unique_id=Cirobu.g00014445	http://ghost.zool.kyoto-u.ac.jp/cgi-bin/fordetailkh21.cgi?name=KH.S404.8;source=kh2013
KH.S115.31	KH2013:KH.S115.31	KH.S115.31	Cirobu.g00013653	3.36308	0.914285	0.125335	-0.257824	0.677496	0	https://www.aniseed.cnrs.fr/aniseed/gene/show_expression?unique_id=Cirobu.g00013653	https://www.aniseed.cnrs.fr/aniseed/gene/show_gene?unique_id=Cirobu.g00013653	http://ghost.zool.kyoto-u.ac.jp/cgi-bin/fordetailkh21.cgi?name=KH.S115.31;source=kh2013
KH.C2.302	TUB	TUB; TULP1; TULP3	Cirobu.g00004488	6.99054	0.913999	0.0748003	0.132141	0.796637	10	https://www.aniseed.cnrs.fr/aniseed/gene/show_expression?unique_id=Cirobu.g00004488	https://www.aniseed.cnrs.fr/aniseed/gene/show_gene?unique_id=Cirobu.g00004488	http://ghost.zool.kyoto-u.ac.jp/cgi-bin/fordetailkh21.cgi?name=KH.C2.302;source=kh2013
KH.C9.77	KH2013:KH.C9.77_MATN4	FBN2; FBN3; LTBP4	Cirobu.g00010349	1.82881	0.911025	0.150083	-0.248131	0.726014	0	https://www.aniseed.cnrs.fr/aniseed/gene/show_expression?unique_id=Cirobu.g00010349	https://www.aniseed.cnrs.fr/aniseed/gene/show_gene?unique_id=Cirobu.g00010349	http://ghost.zool.kyoto-u.ac.jp/cgi-bin/fordetailkh21.cgi?name=KH.C9.77;source=kh2013
KH.C8.123	KH2013:KH.C8.123_MEP1B	ASTL; MEP1A; MEP1B	Cirobu.g00008728	3.4666	0.91086	0.0734229	0.374613	0.471354	0	https://www.aniseed.cnrs.fr/aniseed/gene/show_expression?unique_id=Cirobu.g00008728	https://www.aniseed.cnrs.fr/aniseed/gene/show_gene?unique_id=Cirobu.g00008728	http://ghost.zool.kyoto-u.ac.jp/cgi-bin/fordetailkh21.cgi?name=KH.C8.123;source=kh2013
KH.L63.25	KH2013:KH.L63.25_RXFP1/2	LHCGR; RXFP1; RXFP2	Cirobu.g00012902	2.65743	0.909976	0.108219	-0.346205	0.560468	0	https://www.aniseed.cnrs.fr/aniseed/gene/show_expression?unique_id=Cirobu.g00012902	https://www.aniseed.cnrs.fr/aniseed/gene/show_gene?unique_id=Cirobu.g00012902	http://ghost.zool.kyoto-u.ac.jp/cgi-bin/fordetailkh21.cgi?name=KH.L63.25;source=kh2013
KH.S164.22	KH2013:KH.S164.22	KH.S164.22	Cirobu.g00014000	1.44111	0.909804	0.425877	0.367221	0.768271	0	https://www.aniseed.cnrs.fr/aniseed/gene/show_expression?unique_id=Cirobu.g00014000	https://www.aniseed.cnrs.fr/aniseed/gene/show_gene?unique_id=Cirobu.g00014000	http://ghost.zool.kyoto-u.ac.jp/cgi-bin/fordetailkh21.cgi?name=KH.S164.22;source=kh2013
KH.C11.325	PHLDA2/3	PHLDA2; PHLDA3	Cirobu.g00002149	3.86814	0.909005	0.462117	-0.405119	0.741322	1	https://www.aniseed.cnrs.fr/aniseed/gene/show_expression?unique_id=Cirobu.g00002149	https://www.aniseed.cnrs.fr/aniseed/gene/show_gene?unique_id=Cirobu.g00002149	http://ghost.zool.kyoto-u.ac.jp/cgi-bin/fordetailkh21.cgi?name=KH.C11.325;source=kh2013
KH.C1.1245	2610001J05RIK	KH.C1.1245	Cirobu.g00000272	0.571146	0.908232	0.235267	0.0814376	1	0	https://www.aniseed.cnrs.fr/aniseed/gene/show_expression?unique_id=Cirobu.g00000272	https://www.aniseed.cnrs.fr/aniseed/gene/show_gene?unique_id=Cirobu.g00000272	http://ghost.zool.kyoto-u.ac.jp/cgi-bin/fordetailkh21.cgi?name=KH.C1.1245;source=kh2013
KH.C3.360	KH2013:KH.C3.360_THBS1	SSPO; THBS1; THBS2	Cirobu.g00005534	0.0763858	0.905231	0.328169	-0.00392302	1	0	https://www.aniseed.cnrs.fr/aniseed/gene/show_expression?unique_id=Cirobu.g00005534	https://www.aniseed.cnrs.fr/aniseed/gene/show_gene?unique_id=Cirobu.g00005534	http://ghost.zool.kyoto-u.ac.jp/cgi-bin/fordetailkh21.cgi?name=KH.C3.360;source=kh2013
KH.C8.499	MRPL42	MRPL42	Cirobu.g00009138	4.42584	0.904743	0.0304552	-0.370012	0.374779	0	https://www.aniseed.cnrs.fr/aniseed/gene/show_expression?unique_id=Cirobu.g00009138	https://www.aniseed.cnrs.fr/aniseed/gene/show_gene?unique_id=Cirobu.g00009138	http://ghost.zool.kyoto-u.ac.jp/cgi-bin/fordetailkh21.cgi?name=KH.C8.499;source=kh2013
KH.C9.82	IVNS1ABP	IVNS1ABP; KLHL20; KLHL3	Cirobu.g00010405	6.04812	0.904057	0.138686	0.094562	0.87873	1	https://www.aniseed.cnrs.fr/aniseed/gene/show_expression?unique_id=Cirobu.g00010405	https://www.aniseed.cnrs.fr/aniseed/gene/show_gene?unique_id=Cirobu.g00010405	http://ghost.zool.kyoto-u.ac.jp/cgi-bin/fordetailkh21.cgi?name=KH.C9.82;source=kh2013
KH.C12.633	TAT	GPT2; KYAT1; TAT	Cirobu.g00003207	1.0115	0.904004	0.472906	-0.800271	0.514336	0	https://www.aniseed.cnrs.fr/aniseed/gene/show_expression?unique_id=Cirobu.g00003207	https://www.aniseed.cnrs.fr/aniseed/gene/show_gene?unique_id=Cirobu.g00003207	http://ghost.zool.kyoto-u.ac.jp/cgi-bin/fordetailkh21.cgi?name=KH.C12.633;source=kh2013
KH.C5.103	WSCD1	KH.C5.103	Cirobu.g00006961	2.34484	0.902851	0.223798	0.107697	0.902815	0	https://www.aniseed.cnrs.fr/aniseed/gene/show_expression?unique_id=Cirobu.g00006961	https://www.aniseed.cnrs.fr/aniseed/gene/show_gene?unique_id=Cirobu.g00006961	http://ghost.zool.kyoto-u.ac.jp/cgi-bin/fordetailkh21.cgi?name=KH.C5.103;source=kh2013
KH.L4.21	DCUN1D3	DCUN1D1; DCUN1D2; DCUN1D3	Cirobu.g00012488	6.86373	0.901825	0.0385209	-0.184075	0.673407	4	https://www.aniseed.cnrs.fr/aniseed/gene/show_expression?unique_id=Cirobu.g00012488	https://www.aniseed.cnrs.fr/aniseed/gene/show_gene?unique_id=Cirobu.g00012488	http://ghost.zool.kyoto-u.ac.jp/cgi-bin/fordetailkh21.cgi?name=KH.L4.21;source=kh2013
KH.S1227.2	KH2013:KH.S1227.2_BATH-1/10/13/15/2/20/24/27/29/3/31/33/35/36/38/39/4/5/7/9	KLHL12; KLHL17; KLHL2	Cirobu.g00013729	1.83856	0.901036	0.145595	0.273837	0.685027	0	https://www.aniseed.cnrs.fr/aniseed/gene/show_expression?unique_id=Cirobu.g00013729	https://www.aniseed.cnrs.fr/aniseed/gene/show_gene?unique_id=Cirobu.g00013729	http://ghost.zool.kyoto-u.ac.jp/cgi-bin/fordetailkh21.cgi?name=KH.S1227.2;source=kh2013
KH.C1.1061	KH2013:KH.C1.1061_TRIM2	KH.C1.1061	Cirobu.g00000071	0.669307	0.901022	0.537067	1.4839	0.325171	0	https://www.aniseed.cnrs.fr/aniseed/gene/show_expression?unique_id=Cirobu.g00000071	https://www.aniseed.cnrs.fr/aniseed/gene/show_gene?unique_id=Cirobu.g00000071	http://ghost.zool.kyoto-u.ac.jp/cgi-bin/fordetailkh21.cgi?name=KH.C1.1061;source=kh2013
KH.C2.476	CYP11B1/2	CYP11A1; CYP11B2; CYP24A1	Cirobu.g00004677	4.4671	0.900445	0.074985	0.62733	0.215847	0	https://www.aniseed.cnrs.fr/aniseed/gene/show_expression?unique_id=Cirobu.g00004677	https://www.aniseed.cnrs.fr/aniseed/gene/show_gene?unique_id=Cirobu.g00004677	http://ghost.zool.kyoto-u.ac.jp/cgi-bin/fordetailkh21.cgi?name=KH.C2.476;source=kh2013
KH.S489.5	KH2013:KH.S489.5_MS4A1/15/18/2/3	KH.S489.5	Cirobu.g00014575	0.0848636	0.900115	0.325483	-0.332648	0.784714	4	https://www.aniseed.cnrs.fr/aniseed/gene/show_expression?unique_id=Cirobu.g00014575	https://www.aniseed.cnrs.fr/aniseed/gene/show_gene?unique_id=Cirobu.g00014575	http://ghost.zool.kyoto-u.ac.jp/cgi-bin/fordetailkh21.cgi?name=KH.S489.5;source=kh2013
KH.C1.887	CNTD1	CNTD1	Cirobu.g00001170	1.59433	0.897712	0.250585	0.116063	0.900161	0	https://www.aniseed.cnrs.fr/aniseed/gene/show_expression?unique_id=Cirobu.g00001170	https://www.aniseed.cnrs.fr/aniseed/gene/show_gene?unique_id=Cirobu.g00001170	http://ghost.zool.kyoto-u.ac.jp/cgi-bin/fordetailkh21.cgi?name=KH.C1.887;source=kh2013
KH.L41.22	KH2013:KH.L41.22_TECTB	TECTA; TECTB; UMODL1	Cirobu.g00012573	1.67783	0.897614	0.308825	0.405123	0.660152	0	https://www.aniseed.cnrs.fr/aniseed/gene/show_expression?unique_id=Cirobu.g00012573	https://www.aniseed.cnrs.fr/aniseed/gene/show_gene?unique_id=Cirobu.g00012573	http://ghost.zool.kyoto-u.ac.jp/cgi-bin/fordetailkh21.cgi?name=KH.L41.22;source=kh2013
KH.C8.93	TMEM62	TMEM62	Cirobu.g00009606	6.58876	0.897586	0.0230381	-0.75116	0.0577714	0	https://www.aniseed.cnrs.fr/aniseed/gene/show_expression?unique_id=Cirobu.g00009606	https://www.aniseed.cnrs.fr/aniseed/gene/show_gene?unique_id=Cirobu.g00009606	http://ghost.zool.kyoto-u.ac.jp/cgi-bin/fordetailkh21.cgi?name=KH.C8.93;source=kh2013
KH.C10.620	TMEM30A	TMEM30A; TMEM30B	Cirobu.g00001857	1.98584	0.896725	0.182658	0.0809289	0.930346	0	https://www.aniseed.cnrs.fr/aniseed/gene/show_expression?unique_id=Cirobu.g00001857	https://www.aniseed.cnrs.fr/aniseed/gene/show_gene?unique_id=Cirobu.g00001857	http://ghost.zool.kyoto-u.ac.jp/cgi-bin/fordetailkh21.cgi?name=KH.C10.620;source=kh2013
KH.L37.38	GPT/2	GPT; GPT2; TAT	Cirobu.g00012401	5.72883	0.896711	0.0715672	-0.0182868	0.970904	9	https://www.aniseed.cnrs.fr/aniseed/gene/show_expression?unique_id=Cirobu.g00012401	https://www.aniseed.cnrs.fr/aniseed/gene/show_gene?unique_id=Cirobu.g00012401	http://ghost.zool.kyoto-u.ac.jp/cgi-bin/fordetailkh21.cgi?name=KH.L37.38;source=kh2013
KH.L128.12	HOXC4/5	HOXA3; HOXB3; MNX1	Cirobu.g00010957	2.68768	0.895728	0.138006	-1.93688	0.00346693	59	https://www.aniseed.cnrs.fr/aniseed/gene/show_expression?unique_id=Cirobu.g00010957	https://www.aniseed.cnrs.fr/aniseed/gene/show_gene?unique_id=Cirobu.g00010957	http://ghost.zool.kyoto-u.ac.jp/cgi-bin/fordetailkh21.cgi?name=KH.L128.12;source=kh2013
KH.L170.8	PNKP	APTX; PNKP	Cirobu.g00011819	3.95122	0.895346	0.0284234	-0.0435367	0.927225	0	https://www.aniseed.cnrs.fr/aniseed/gene/show_expression?unique_id=Cirobu.g00011819	https://www.aniseed.cnrs.fr/aniseed/gene/show_gene?unique_id=Cirobu.g00011819	http://ghost.zool.kyoto-u.ac.jp/cgi-bin/fordetailkh21.cgi?name=KH.L170.8;source=kh2013
KH.C5.348	KH2013:KH.C5.348_EPS15	EPS15; EPS15L1; ITSN1	Cirobu.g00007223	8.02729	0.894081	0.0257551	0.215512	0.589213	2	https://www.aniseed.cnrs.fr/aniseed/gene/show_expression?unique_id=Cirobu.g00007223	https://www.aniseed.cnrs.fr/aniseed/gene/show_gene?unique_id=Cirobu.g00007223	http://ghost.zool.kyoto-u.ac.jp/cgi-bin/fordetailkh21.cgi?name=KH.C5.348;source=kh2013
KH.C1.849	KH2013:KH.C1.849	KH.C1.849	Cirobu.g00001128	3.0651	0.893606	0.654535	-0.318278	0.873314	1	https://www.aniseed.cnrs.fr/aniseed/gene/show_expression?unique_id=Cirobu.g00001128	https://www.aniseed.cnrs.fr/aniseed/gene/show_gene?unique_id=Cirobu.g00001128	http://ghost.zool.kyoto-u.ac.jp/cgi-bin/fordetailkh21.cgi?name=KH.C1.849;source=kh2013
KH.S1446.3	PREX1/2	ARHGEF9; PREX1; PREX2	Cirobu.g00013877	2.03254	0.893247	0.521053	-2.12186	0.141089	1	https://www.aniseed.cnrs.fr/aniseed/gene/show_expression?unique_id=Cirobu.g00013877	https://www.aniseed.cnrs.fr/aniseed/gene/show_gene?unique_id=Cirobu.g00013877	http://ghost.zool.kyoto-u.ac.jp/cgi-bin/fordetailkh21.cgi?name=KH.S1446.3;source=kh2013
KH.L20.12	SGPP1/2	SGPP1; SGPP2	Cirobu.g00012063	6.63466	0.892573	0.0448059	-0.00249248	0.995132	0	https://www.aniseed.cnrs.fr/aniseed/gene/show_expression?unique_id=Cirobu.g00012063	https://www.aniseed.cnrs.fr/aniseed/gene/show_gene?unique_id=Cirobu.g00012063	http://ghost.zool.kyoto-u.ac.jp/cgi-bin/fordetailkh21.cgi?name=KH.L20.12;source=kh2013
KH.L13.2	KH2013:KH.L13.2_HSPG2	CORIN; HSPG2; LRP2	Cirobu.g00010988	3.5245	0.892524	0.140728	-1.00473	0.103189	0	https://www.aniseed.cnrs.fr/aniseed/gene/show_expression?unique_id=Cirobu.g00010988	https://www.aniseed.cnrs.fr/aniseed/gene/show_gene?unique_id=Cirobu.g00010988	http://ghost.zool.kyoto-u.ac.jp/cgi-bin/fordetailkh21.cgi?name=KH.L13.2;source=kh2013
KH.L65.14	PRMT6	PRMT1; PRMT6; PRMT8	Cirobu.g00012920	3.9352	0.89044	0.0878022	-0.748726	0.154539	4	https://www.aniseed.cnrs.fr/aniseed/gene/show_expression?unique_id=Cirobu.g00012920	https://www.aniseed.cnrs.fr/aniseed/gene/show_gene?unique_id=Cirobu.g00012920	http://ghost.zool.kyoto-u.ac.jp/cgi-bin/fordetailkh21.cgi?name=KH.L65.14;source=kh2013
KH.C13.9	KH2013:KH.C13.9_RIF1	RIF1	Cirobu.g00003494	4.25096	0.890192	0.457915	-0.00865006	0.993914	0	https://www.aniseed.cnrs.fr/aniseed/gene/show_expression?unique_id=Cirobu.g00003494	https://www.aniseed.cnrs.fr/aniseed/gene/show_gene?unique_id=Cirobu.g00003494	http://ghost.zool.kyoto-u.ac.jp/cgi-bin/fordetailkh21.cgi?name=KH.C13.9;source=kh2013
KH.C1.178	SSU72	SSU72	Cirobu.g00000390	3.37746	0.888824	0.281224	-0.112972	0.890011	0	https://www.aniseed.cnrs.fr/aniseed/gene/show_expression?unique_id=Cirobu.g00000390	https://www.aniseed.cnrs.fr/aniseed/gene/show_gene?unique_id=Cirobu.g00000390	http://ghost.zool.kyoto-u.ac.jp/cgi-bin/fordetailkh21.cgi?name=KH.C1.178;source=kh2013
KH.C3.108	KIAA1644	SHISAL1	Cirobu.g00005260	6.17814	0.885278	0.015069	-0.134114	0.71307	0	https://www.aniseed.cnrs.fr/aniseed/gene/show_expression?unique_id=Cirobu.g00005260	https://www.aniseed.cnrs.fr/aniseed/gene/show_gene?unique_id=Cirobu.g00005260	http://ghost.zool.kyoto-u.ac.jp/cgi-bin/fordetailkh21.cgi?name=KH.C3.108;source=kh2013
KH.C10.576	RABIF	RABIF	Cirobu.g00001807	5.39615	0.88438	0.0292856	-0.26756	0.506518	0	https://www.aniseed.cnrs.fr/aniseed/gene/show_expression?unique_id=Cirobu.g00001807	https://www.aniseed.cnrs.fr/aniseed/gene/show_gene?unique_id=Cirobu.g00001807	http://ghost.zool.kyoto-u.ac.jp/cgi-bin/fordetailkh21.cgi?name=KH.C10.576;source=kh2013
KH.C11.7	DICER1	DICER1; DROSHA; IFIH1	Cirobu.g00002553	5.31624	0.882276	0.0719642	-0.449769	0.362627	0	https://www.aniseed.cnrs.fr/aniseed/gene/show_expression?unique_id=Cirobu.g00002553	https://www.aniseed.cnrs.fr/aniseed/gene/show_gene?unique_id=Cirobu.g00002553	http://ghost.zool.kyoto-u.ac.jp/cgi-bin/fordetailkh21.cgi?name=KH.C11.7;source=kh2013
KH.C6.284	KH2013:KH.C6.284_TMEM150A	DRAM1; DRAM2; TMEM150A	Cirobu.g00007815	3.82535	0.881638	0.125989	-0.253868	0.653889	4	https://www.aniseed.cnrs.fr/aniseed/gene/show_expression?unique_id=Cirobu.g00007815	https://www.aniseed.cnrs.fr/aniseed/gene/show_gene?unique_id=Cirobu.g00007815	http://ghost.zool.kyoto-u.ac.jp/cgi-bin/fordetailkh21.cgi?name=KH.C6.284;source=kh2013
KH.C3.783	THNSL2	THNSL1; THNSL2	Cirobu.g00005988	5.46947	0.881503	0.0648549	0.228154	0.630947	0	https://www.aniseed.cnrs.fr/aniseed/gene/show_expression?unique_id=Cirobu.g00005988	https://www.aniseed.cnrs.fr/aniseed/gene/show_gene?unique_id=Cirobu.g00005988	http://ghost.zool.kyoto-u.ac.jp/cgi-bin/fordetailkh21.cgi?name=KH.C3.783;source=kh2013
KH.C1.775	KH2013:KH.C1.775	INO80	Cirobu.g00001047	2.80575	0.879373	0.105719	0.938586	0.0848057	4	https://www.aniseed.cnrs.fr/aniseed/gene/show_expression?unique_id=Cirobu.g00001047	https://www.aniseed.cnrs.fr/aniseed/gene/show_gene?unique_id=Cirobu.g00001047	http://ghost.zool.kyoto-u.ac.jp/cgi-bin/fordetailkh21.cgi?name=KH.C1.775;source=kh2013
KH.S761.2	PREX1	INPP4A; PREX1; PREX2	Cirobu.g00015004	2.03215	0.879099	0.494847	-2.22003	0.0973934	0	https://www.aniseed.cnrs.fr/aniseed/gene/show_expression?unique_id=Cirobu.g00015004	https://www.aniseed.cnrs.fr/aniseed/gene/show_gene?unique_id=Cirobu.g00015004	http://ghost.zool.kyoto-u.ac.jp/cgi-bin/fordetailkh21.cgi?name=KH.S761.2;source=kh2013
KH.C10.47	KH2013:KH.C10.47	ADGRG2; ADGRG4; ADGRG7	Cirobu.g00001693	1.47157	0.876639	0.42512	0.43871	0.69811	0	https://www.aniseed.cnrs.fr/aniseed/gene/show_expression?unique_id=Cirobu.g00001693	https://www.aniseed.cnrs.fr/aniseed/gene/show_gene?unique_id=Cirobu.g00001693	http://ghost.zool.kyoto-u.ac.jp/cgi-bin/fordetailkh21.cgi?name=KH.C10.47;source=kh2013
KH.C1.523	GYG/1/2	GYG1; GYG2	Cirobu.g00000771	2.09714	0.876566	0.119996	0.0313848	0.980764	0	https://www.aniseed.cnrs.fr/aniseed/gene/show_expression?unique_id=Cirobu.g00000771	https://www.aniseed.cnrs.fr/aniseed/gene/show_gene?unique_id=Cirobu.g00000771	http://ghost.zool.kyoto-u.ac.jp/cgi-bin/fordetailkh21.cgi?name=KH.C1.523;source=kh2013
KH.C3.768	DNAH8	DNAH2; DNAH5; DNAH8	Cirobu.g00005972	2.5735	0.876208	0.439834	-0.324699	0.774927	0	https://www.aniseed.cnrs.fr/aniseed/gene/show_expression?unique_id=Cirobu.g00005972	https://www.aniseed.cnrs.fr/aniseed/gene/show_gene?unique_id=Cirobu.g00005972	http://ghost.zool.kyoto-u.ac.jp/cgi-bin/fordetailkh21.cgi?name=KH.C3.768;source=kh2013
KH.C2.1056	RSPO1/2/3/4	RSPO1; RSPO2; RSPO3	Cirobu.g00004175	3.37055	0.875888	0.133463	0.303547	0.60035	0	https://www.aniseed.cnrs.fr/aniseed/gene/show_expression?unique_id=Cirobu.g00004175	https://www.aniseed.cnrs.fr/aniseed/gene/show_gene?unique_id=Cirobu.g00004175	http://ghost.zool.kyoto-u.ac.jp/cgi-bin/fordetailkh21.cgi?name=KH.C2.1056;source=kh2013
KH.L122.14	KH2013:KH.L122.14_JMJD5	HSPBAP1; JMJD7; KDM8	Cirobu.g00010893	4.56463	0.875672	0.0288783	-0.410282	0.312671	18	https://www.aniseed.cnrs.fr/aniseed/gene/show_expression?unique_id=Cirobu.g00010893	https://www.aniseed.cnrs.fr/aniseed/gene/show_gene?unique_id=Cirobu.g00010893	http://ghost.zool.kyoto-u.ac.jp/cgi-bin/fordetailkh21.cgi?name=KH.L122.14;source=kh2013
KH.C4.101	KH2013:KH.C4.101	KH.C4.101	Cirobu.g00006166	1.55131	0.875523	0.735071	-1.26032	0.625443	0	https://www.aniseed.cnrs.fr/aniseed/gene/show_expression?unique_id=Cirobu.g00006166	https://www.aniseed.cnrs.fr/aniseed/gene/show_gene?unique_id=Cirobu.g00006166	http://ghost.zool.kyoto-u.ac.jp/cgi-bin/fordetailkh21.cgi?name=KH.C4.101;source=kh2013
KH.C14.292	ACCN4	ASIC2; ASIC3; ASIC5	Cirobu.g00003716	1.35487	0.875064	0.313373	0.294574	0.752284	2	https://www.aniseed.cnrs.fr/aniseed/gene/show_expression?unique_id=Cirobu.g00003716	https://www.aniseed.cnrs.fr/aniseed/gene/show_gene?unique_id=Cirobu.g00003716	http://ghost.zool.kyoto-u.ac.jp/cgi-bin/fordetailkh21.cgi?name=KH.C14.292;source=kh2013
KH.C9.171	KH2013:KH.C9.171_LRSAM1	BIRC7; LRSAM1; XIAP	Cirobu.g00009692	3.02019	0.874754	0.0791302	-0.333175	0.519198	0	https://www.aniseed.cnrs.fr/aniseed/gene/show_expression?unique_id=Cirobu.g00009692	https://www.aniseed.cnrs.fr/aniseed/gene/show_gene?unique_id=Cirobu.g00009692	http://ghost.zool.kyoto-u.ac.jp/cgi-bin/fordetailkh21.cgi?name=KH.C9.171;source=kh2013
KH.C2.614	ADA	ADA; ADA2; ADAL	Cirobu.g00004831	3.05064	0.873839	0.455595	0.170085	0.884817	0	https://www.aniseed.cnrs.fr/aniseed/gene/show_expression?unique_id=Cirobu.g00004831	https://www.aniseed.cnrs.fr/aniseed/gene/show_gene?unique_id=Cirobu.g00004831	http://ghost.zool.kyoto-u.ac.jp/cgi-bin/fordetailkh21.cgi?name=KH.C2.614;source=kh2013
KH.C6.257	S1PR2/4	LPAR2; S1PR1; S1PR2	Cirobu.g00007785	3.01648	0.873817	0.104584	0.653678	0.22975	0	https://www.aniseed.cnrs.fr/aniseed/gene/show_expression?unique_id=Cirobu.g00007785	https://www.aniseed.cnrs.fr/aniseed/gene/show_gene?unique_id=Cirobu.g00007785	http://ghost.zool.kyoto-u.ac.jp/cgi-bin/fordetailkh21.cgi?name=KH.C6.257;source=kh2013
KH.C2.287	KH2013:KH.C2.287_DSCAM/2/3/4	IGSF22; MYBPC3; TTN	Cirobu.g00004470	4.42994	0.873803	0.0256042	0.505671	0.199796	0	https://www.aniseed.cnrs.fr/aniseed/gene/show_expression?unique_id=Cirobu.g00004470	https://www.aniseed.cnrs.fr/aniseed/gene/show_gene?unique_id=Cirobu.g00004470	http://ghost.zool.kyoto-u.ac.jp/cgi-bin/fordetailkh21.cgi?name=KH.C2.287;source=kh2013
KH.L18.93	KH2013:KH.L18.93_IL17RA	IL17RA; IL17RD	Cirobu.g00012036	3.90902	0.87352	0.0256877	-0.519755	0.195356	0	https://www.aniseed.cnrs.fr/aniseed/gene/show_expression?unique_id=Cirobu.g00012036	https://www.aniseed.cnrs.fr/aniseed/gene/show_gene?unique_id=Cirobu.g00012036	http://ghost.zool.kyoto-u.ac.jp/cgi-bin/fordetailkh21.cgi?name=KH.L18.93;source=kh2013
KH.C3.706	KH2013:KH.C3.706_BAI3	ADGRB3; CILP; SSPO	Cirobu.g00005907	0.134264	0.873436	0.474958	-0.297673	0.799175	0	https://www.aniseed.cnrs.fr/aniseed/gene/show_expression?unique_id=Cirobu.g00005907	https://www.aniseed.cnrs.fr/aniseed/gene/show_gene?unique_id=Cirobu.g00005907	http://ghost.zool.kyoto-u.ac.jp/cgi-bin/fordetailkh21.cgi?name=KH.C3.706;source=kh2013
KH.L4.44	TUSC2	TUSC2	Cirobu.g00012512	2.55798	0.871928	0.118231	-0.429395	0.477575	4	https://www.aniseed.cnrs.fr/aniseed/gene/show_expression?unique_id=Cirobu.g00012512	https://www.aniseed.cnrs.fr/aniseed/gene/show_gene?unique_id=Cirobu.g00012512	http://ghost.zool.kyoto-u.ac.jp/cgi-bin/fordetailkh21.cgi?name=KH.L4.44;source=kh2013
KH.C7.380	FBXW10	AC005324.3; CDRT1; FBXW10	Cirobu.g00008222	2.04092	0.871719	0.199021	0.403385	0.567161	0	https://www.aniseed.cnrs.fr/aniseed/gene/show_expression?unique_id=Cirobu.g00008222	https://www.aniseed.cnrs.fr/aniseed/gene/show_gene?unique_id=Cirobu.g00008222	http://ghost.zool.kyoto-u.ac.jp/cgi-bin/fordetailkh21.cgi?name=KH.C7.380;source=kh2013
KH.C11.631	AKAP6	KH.C11.631	Cirobu.g00002481	1.85146	0.871283	0.468638	0.683668	0.578898	3	https://www.aniseed.cnrs.fr/aniseed/gene/show_expression?unique_id=Cirobu.g00002481	https://www.aniseed.cnrs.fr/aniseed/gene/show_gene?unique_id=Cirobu.g00002481	http://ghost.zool.kyoto-u.ac.jp/cgi-bin/fordetailkh21.cgi?name=KH.C11.631;source=kh2013
KH.C7.579	SSSCA1	SSSCA1	Cirobu.g00008438	2.16152	0.870397	0.171249	-0.163538	0.80197	0	https://www.aniseed.cnrs.fr/aniseed/gene/show_expression?unique_id=Cirobu.g00008438	https://www.aniseed.cnrs.fr/aniseed/gene/show_gene?unique_id=Cirobu.g00008438	http://ghost.zool.kyoto-u.ac.jp/cgi-bin/fordetailkh21.cgi?name=KH.C7.579;source=kh2013
KH.C10.283	KH2013:KH.C10.283	KH.C10.283	Cirobu.g00001493	4.01218	0.869271	0.0278476	0.0167221	0.971616	5	https://www.aniseed.cnrs.fr/aniseed/gene/show_expression?unique_id=Cirobu.g00001493	https://www.aniseed.cnrs.fr/aniseed/gene/show_gene?unique_id=Cirobu.g00001493	http://ghost.zool.kyoto-u.ac.jp/cgi-bin/fordetailkh21.cgi?name=KH.C10.283;source=kh2013
KH.C4.593	KH2013:KH.C4.593_RIPK2/3	ANKK1; RIPK1; RIPK3	Cirobu.g00006696	2.14085	0.869066	0.547767	0.71846	0.618601	0	https://www.aniseed.cnrs.fr/aniseed/gene/show_expression?unique_id=Cirobu.g00006696	https://www.aniseed.cnrs.fr/aniseed/gene/show_gene?unique_id=Cirobu.g00006696	http://ghost.zool.kyoto-u.ac.jp/cgi-bin/fordetailkh21.cgi?name=KH.C4.593;source=kh2013
KH.L170.87	ZCCHC10	ZCCHC10	Cirobu.g00011827	4.34738	0.869056	0.056196	-0.0702022	0.876101	0	https://www.aniseed.cnrs.fr/aniseed/gene/show_expression?unique_id=Cirobu.g00011827	https://www.aniseed.cnrs.fr/aniseed/gene/show_gene?unique_id=Cirobu.g00011827	http://ghost.zool.kyoto-u.ac.jp/cgi-bin/fordetailkh21.cgi?name=KH.L170.87;source=kh2013
KH.L57.12	KDELR/2/3	KDELR1; KDELR2; KDELR3	Cirobu.g00012799	2.20481	0.868513	0.223909	1.40738	0.0493854	4	https://www.aniseed.cnrs.fr/aniseed/gene/show_expression?unique_id=Cirobu.g00012799	https://www.aniseed.cnrs.fr/aniseed/gene/show_gene?unique_id=Cirobu.g00012799	http://ghost.zool.kyoto-u.ac.jp/cgi-bin/fordetailkh21.cgi?name=KH.L57.12;source=kh2013
KH.C3.400	HECW1/2	HECW1; HECW2; NEDD4L	Cirobu.g00005578	6.17761	0.867987	0.0340332	-0.751724	0.0667354	0	https://www.aniseed.cnrs.fr/aniseed/gene/show_expression?unique_id=Cirobu.g00005578	https://www.aniseed.cnrs.fr/aniseed/gene/show_gene?unique_id=Cirobu.g00005578	http://ghost.zool.kyoto-u.ac.jp/cgi-bin/fordetailkh21.cgi?name=KH.C3.400;source=kh2013
KH.C1.430	KH2013:KH.C1.430	KH.C1.430	Cirobu.g00000671	0.587306	0.867553	0.410778	-0.653519	0.530222	0	https://www.aniseed.cnrs.fr/aniseed/gene/show_expression?unique_id=Cirobu.g00000671	https://www.aniseed.cnrs.fr/aniseed/gene/show_gene?unique_id=Cirobu.g00000671	http://ghost.zool.kyoto-u.ac.jp/cgi-bin/fordetailkh21.cgi?name=KH.C1.430;source=kh2013
KH.S215.11	GPSM1/2	GPSM1; GPSM2; TTC28	Cirobu.g00014199	5.73428	0.867101	0.0177591	-0.0645454	0.859189	0	https://www.aniseed.cnrs.fr/aniseed/gene/show_expression?unique_id=Cirobu.g00014199	https://www.aniseed.cnrs.fr/aniseed/gene/show_gene?unique_id=Cirobu.g00014199	http://ghost.zool.kyoto-u.ac.jp/cgi-bin/fordetailkh21.cgi?name=KH.S215.11;source=kh2013
KH.C6.264	KH2013:KH.C6.264_DAF-36	KH.C6.264	Cirobu.g00007793	3.44428	0.865778	0.0780974	-0.260093	0.594207	4	https://www.aniseed.cnrs.fr/aniseed/gene/show_expression?unique_id=Cirobu.g00007793	https://www.aniseed.cnrs.fr/aniseed/gene/show_gene?unique_id=Cirobu.g00007793	http://ghost.zool.kyoto-u.ac.jp/cgi-bin/fordetailkh21.cgi?name=KH.C6.264;source=kh2013
KH.C5.390	KH2013:KH.C5.390_AGBL2/3	AGBL2; AGBL3; AGTPBP1	Cirobu.g00007269	2.90155	0.863996	0.145279	-0.257346	0.674758	0	https://www.aniseed.cnrs.fr/aniseed/gene/show_expression?unique_id=Cirobu.g00007269	https://www.aniseed.cnrs.fr/aniseed/gene/show_gene?unique_id=Cirobu.g00007269	http://ghost.zool.kyoto-u.ac.jp/cgi-bin/fordetailkh21.cgi?name=KH.C5.390;source=kh2013
KH.C4.324	4922501L14RIK	ERICH3	Cirobu.g00006406	3.52109	0.863543	0.46569	-0.465003	0.69172	0	https://www.aniseed.cnrs.fr/aniseed/gene/show_expression?unique_id=Cirobu.g00006406	https://www.aniseed.cnrs.fr/aniseed/gene/show_gene?unique_id=Cirobu.g00006406	http://ghost.zool.kyoto-u.ac.jp/cgi-bin/fordetailkh21.cgi?name=KH.C4.324;source=kh2013
KH.C9.886	F33E2.7	KH.C9.886	Cirobu.g00010475	3.69037	0.86342	0.44962	0.180576	0.876308	0	https://www.aniseed.cnrs.fr/aniseed/gene/show_expression?unique_id=Cirobu.g00010475	https://www.aniseed.cnrs.fr/aniseed/gene/show_gene?unique_id=Cirobu.g00010475	http://ghost.zool.kyoto-u.ac.jp/cgi-bin/fordetailkh21.cgi?name=KH.C9.886;source=kh2013
KH.C14.227	KH2013:KH.C14.227	KH.C14.227	Cirobu.g00003645	5.94327	0.863301	0.0508485	-0.134082	0.759599	0	https://www.aniseed.cnrs.fr/aniseed/gene/show_expression?unique_id=Cirobu.g00003645	https://www.aniseed.cnrs.fr/aniseed/gene/show_gene?unique_id=Cirobu.g00003645	http://ghost.zool.kyoto-u.ac.jp/cgi-bin/fordetailkh21.cgi?name=KH.C14.227;source=kh2013
KH.C7.53	CYP4F13/14/15/16/17/18/22/40	CYP4F12; CYP4F2; CYP4F3	Cirobu.g00008385	3.8039	0.862693	0.210305	0.958676	0.163872	0	https://www.aniseed.cnrs.fr/aniseed/gene/show_expression?unique_id=Cirobu.g00008385	https://www.aniseed.cnrs.fr/aniseed/gene/show_gene?unique_id=Cirobu.g00008385	http://ghost.zool.kyoto-u.ac.jp/cgi-bin/fordetailkh21.cgi?name=KH.C7.53;source=kh2013
KH.C1.1208	C12ORF56	C12orf56	Cirobu.g00000232	3.36284	0.861915	0.137148	-0.921385	0.126458	0	https://www.aniseed.cnrs.fr/aniseed/gene/show_expression?unique_id=Cirobu.g00000232	https://www.aniseed.cnrs.fr/aniseed/gene/show_gene?unique_id=Cirobu.g00000232	http://ghost.zool.kyoto-u.ac.jp/cgi-bin/fordetailkh21.cgi?name=KH.C1.1208;source=kh2013
KH.C14.598	IAP2	BIRC2; BIRC8; XIAP	Cirobu.g00004046	2.83247	0.860316	0.25031	-0.383243	0.603576	0	https://www.aniseed.cnrs.fr/aniseed/gene/show_expression?unique_id=Cirobu.g00004046	https://www.aniseed.cnrs.fr/aniseed/gene/show_gene?unique_id=Cirobu.g00004046	http://ghost.zool.kyoto-u.ac.jp/cgi-bin/fordetailkh21.cgi?name=KH.C14.598;source=kh2013
KH.C9.749	RBM43	PARP14; RBM43	Cirobu.g00010326	3.28782	0.859825	0.281464	-0.230799	0.764531	0	https://www.aniseed.cnrs.fr/aniseed/gene/show_expression?unique_id=Cirobu.g00010326	https://www.aniseed.cnrs.fr/aniseed/gene/show_gene?unique_id=Cirobu.g00010326	http://ghost.zool.kyoto-u.ac.jp/cgi-bin/fordetailkh21.cgi?name=KH.C9.749;source=kh2013
KH.L64.2	CDH10/11/18/22/7/8	CDH23; CDHR1; FAT1	Cirobu.g00012912	3.8525	0.859547	0.208444	-0.0587708	0.930093	0	https://www.aniseed.cnrs.fr/aniseed/gene/show_expression?unique_id=Cirobu.g00012912	https://www.aniseed.cnrs.fr/aniseed/gene/show_gene?unique_id=Cirobu.g00012912	http://ghost.zool.kyoto-u.ac.jp/cgi-bin/fordetailkh21.cgi?name=KH.L64.2;source=kh2013
KH.L70.8	KH2013:KH.L70.8_C10C5.3/4/5	ABHD14A-ACY1; ACY1; PM20D1	Cirobu.g00013007	1.53188	0.858834	0.241658	-0.162697	0.818627	0	https://www.aniseed.cnrs.fr/aniseed/gene/show_expression?unique_id=Cirobu.g00013007	https://www.aniseed.cnrs.fr/aniseed/gene/show_gene?unique_id=Cirobu.g00013007	http://ghost.zool.kyoto-u.ac.jp/cgi-bin/fordetailkh21.cgi?name=KH.L70.8;source=kh2013
KH.S164.3	ARL8A	ARF1; ARL8A; ARL8B	Cirobu.g00014008	3.46907	0.858014	0.129533	0.511665	0.367166	8	https://www.aniseed.cnrs.fr/aniseed/gene/show_expression?unique_id=Cirobu.g00014008	https://www.aniseed.cnrs.fr/aniseed/gene/show_gene?unique_id=Cirobu.g00014008	http://ghost.zool.kyoto-u.ac.jp/cgi-bin/fordetailkh21.cgi?name=KH.S164.3;source=kh2013
KH.C1.1277	HTRA1/2/3/4	HTRA1; HTRA3; HTRA4	Cirobu.g00000307	4.78588	0.857639	0.0783094	-0.509612	0.297964	0	https://www.aniseed.cnrs.fr/aniseed/gene/show_expression?unique_id=Cirobu.g00000307	https://www.aniseed.cnrs.fr/aniseed/gene/show_gene?unique_id=Cirobu.g00000307	http://ghost.zool.kyoto-u.ac.jp/cgi-bin/fordetailkh21.cgi?name=KH.C1.1277;source=kh2013
KH.C1.167	MIEN1	MIEN1	Cirobu.g00000378	4.28056	0.857484	0.0471046	0.27089	0.529494	0	https://www.aniseed.cnrs.fr/aniseed/gene/show_expression?unique_id=Cirobu.g00000378	https://www.aniseed.cnrs.fr/aniseed/gene/show_gene?unique_id=Cirobu.g00000378	http://ghost.zool.kyoto-u.ac.jp/cgi-bin/fordetailkh21.cgi?name=KH.C1.167;source=kh2013
KH.L116.1	KH2013:KH.L116.1_NKPD1	KIDINS220; NKPD1	Cirobu.g00010736	3.71645	0.8573	0.240065	-0.557661	0.441155	0	https://www.aniseed.cnrs.fr/aniseed/gene/show_expression?unique_id=Cirobu.g00010736	https://www.aniseed.cnrs.fr/aniseed/gene/show_gene?unique_id=Cirobu.g00010736	http://ghost.zool.kyoto-u.ac.jp/cgi-bin/fordetailkh21.cgi?name=KH.L116.1;source=kh2013
KH.C12.332	KH2013:KH.C12.332	KH.C12.332	Cirobu.g00002878	0.00205512	0.856733	0.296589	0.867963	0.282249	0	https://www.aniseed.cnrs.fr/aniseed/gene/show_expression?unique_id=Cirobu.g00002878	https://www.aniseed.cnrs.fr/aniseed/gene/show_gene?unique_id=Cirobu.g00002878	http://ghost.zool.kyoto-u.ac.jp/cgi-bin/fordetailkh21.cgi?name=KH.C12.332;source=kh2013
KH.C6.202	PRSS23/35	F10; PRSS23; PRSS35	Cirobu.g00007726	3.64206	0.856365	0.135706	-0.155703	0.788086	4	https://www.aniseed.cnrs.fr/aniseed/gene/show_expression?unique_id=Cirobu.g00007726	https://www.aniseed.cnrs.fr/aniseed/gene/show_gene?unique_id=Cirobu.g00007726	http://ghost.zool.kyoto-u.ac.jp/cgi-bin/fordetailkh21.cgi?name=KH.C6.202;source=kh2013
KH.C3.297	UBE2QL1	UBE2Q1; UBE2Q2; UBE2QL1	Cirobu.g00005466	8.11715	0.854988	0.0264864	0.194135	0.612942	8	https://www.aniseed.cnrs.fr/aniseed/gene/show_expression?unique_id=Cirobu.g00005466	https://www.aniseed.cnrs.fr/aniseed/gene/show_gene?unique_id=Cirobu.g00005466	http://ghost.zool.kyoto-u.ac.jp/cgi-bin/fordetailkh21.cgi?name=KH.C3.297;source=kh2013
KH.C8.457	APC/2	AC008575.1; APC; APC2	Cirobu.g00009093	6.57178	0.854067	0.0776085	-0.656454	0.174156	9	https://www.aniseed.cnrs.fr/aniseed/gene/show_expression?unique_id=Cirobu.g00009093	https://www.aniseed.cnrs.fr/aniseed/gene/show_gene?unique_id=Cirobu.g00009093	http://ghost.zool.kyoto-u.ac.jp/cgi-bin/fordetailkh21.cgi?name=KH.C8.457;source=kh2013
KH.C5.254	FYB	FYB1	Cirobu.g00007125	3.47339	0.853953	0.125686	0.108231	0.856074	1	https://www.aniseed.cnrs.fr/aniseed/gene/show_expression?unique_id=Cirobu.g00007125	https://www.aniseed.cnrs.fr/aniseed/gene/show_gene?unique_id=Cirobu.g00007125	http://ghost.zool.kyoto-u.ac.jp/cgi-bin/fordetailkh21.cgi?name=KH.C5.254;source=kh2013
KH.C9.527	CACFD1	CACFD1	Cirobu.g00010081	5.92697	0.850477	0.0559379	0.205861	0.64361	4	https://www.aniseed.cnrs.fr/aniseed/gene/show_expression?unique_id=Cirobu.g00010081	https://www.aniseed.cnrs.fr/aniseed/gene/show_gene?unique_id=Cirobu.g00010081	http://ghost.zool.kyoto-u.ac.jp/cgi-bin/fordetailkh21.cgi?name=KH.C9.527;source=kh2013
KH.C8.356	GAK	AAK1; DNAJC6; GAK	Cirobu.g00008981	7.80907	0.850354	0.0583735	-0.287192	0.520307	0	https://www.aniseed.cnrs.fr/aniseed/gene/show_expression?unique_id=Cirobu.g00008981	https://www.aniseed.cnrs.fr/aniseed/gene/show_gene?unique_id=Cirobu.g00008981	http://ghost.zool.kyoto-u.ac.jp/cgi-bin/fordetailkh21.cgi?name=KH.C8.356;source=kh2013
KH.C5.24	TMEM9	TMEM9; TMEM9B	Cirobu.g00007110	6.71136	0.849719	0.023193	0.28173	0.450001	0	https://www.aniseed.cnrs.fr/aniseed/gene/show_expression?unique_id=Cirobu.g00007110	https://www.aniseed.cnrs.fr/aniseed/gene/show_gene?unique_id=Cirobu.g00007110	http://ghost.zool.kyoto-u.ac.jp/cgi-bin/fordetailkh21.cgi?name=KH.C5.24;source=kh2013
KH.C7.373	KH2013:KH.C7.373	SLC43A2; SLC43A3	Cirobu.g00008214	0.0810143	0.849479	0.597721	0.427771	0.818741	0	https://www.aniseed.cnrs.fr/aniseed/gene/show_expression?unique_id=Cirobu.g00008214	https://www.aniseed.cnrs.fr/aniseed/gene/show_gene?unique_id=Cirobu.g00008214	http://ghost.zool.kyoto-u.ac.jp/cgi-bin/fordetailkh21.cgi?name=KH.C7.373;source=kh2013
KH.C7.672	KH2013:KH.C7.672_SLC17A3/5	SLC17A5; SLC17A6; SLC17A8	Cirobu.g00008541	1.05657	0.848968	0.323067	0.859145	0.332078	0	https://www.aniseed.cnrs.fr/aniseed/gene/show_expression?unique_id=Cirobu.g00008541	https://www.aniseed.cnrs.fr/aniseed/gene/show_gene?unique_id=Cirobu.g00008541	http://ghost.zool.kyoto-u.ac.jp/cgi-bin/fordetailkh21.cgi?name=KH.C7.672;source=kh2013
KH.C3.681	KH2013:KH.C3.681_CDIPT	KH.C3.681	Cirobu.g00005880	1.82521	0.847084	0.293684	-0.0431438	0.966838	0	https://www.aniseed.cnrs.fr/aniseed/gene/show_expression?unique_id=Cirobu.g00005880	https://www.aniseed.cnrs.fr/aniseed/gene/show_gene?unique_id=Cirobu.g00005880	http://ghost.zool.kyoto-u.ac.jp/cgi-bin/fordetailkh21.cgi?name=KH.C3.681;source=kh2013
KH.C10.271	MCEE	MCEE	Cirobu.g00001480	3.83463	0.846855	0.402183	0.0462039	0.968636	0	https://www.aniseed.cnrs.fr/aniseed/gene/show_expression?unique_id=Cirobu.g00001480	https://www.aniseed.cnrs.fr/aniseed/gene/show_gene?unique_id=Cirobu.g00001480	http://ghost.zool.kyoto-u.ac.jp/cgi-bin/fordetailkh21.cgi?name=KH.C10.271;source=kh2013
KH.C12.122	KH2013:KH.C12.122	KH.C12.122	Cirobu.g00002648	1.61314	0.845945	0.241821	-1.71979	0.0291688	0	https://www.aniseed.cnrs.fr/aniseed/gene/show_expression?unique_id=Cirobu.g00002648	https://www.aniseed.cnrs.fr/aniseed/gene/show_gene?unique_id=Cirobu.g00002648	http://ghost.zool.kyoto-u.ac.jp/cgi-bin/fordetailkh21.cgi?name=KH.C12.122;source=kh2013
KH.C3.449	GRID2IP	DAAM1; DIAPH2; GRID2IP	Cirobu.g00005630	2.53381	0.844804	0.442641	-0.818355	0.456352	0	https://www.aniseed.cnrs.fr/aniseed/gene/show_expression?unique_id=Cirobu.g00005630	https://www.aniseed.cnrs.fr/aniseed/gene/show_gene?unique_id=Cirobu.g00005630	http://ghost.zool.kyoto-u.ac.jp/cgi-bin/fordetailkh21.cgi?name=KH.C3.449;source=kh2013
KH.C8.208	ATP6V1B1/2	ATP5F1B; ATP6V1B1; ATP6V1B2	Cirobu.g00008822	6.40913	0.844791	0.0223926	-0.0699089	0.849435	0	https://www.aniseed.cnrs.fr/aniseed/gene/show_expression?unique_id=Cirobu.g00008822	https://www.aniseed.cnrs.fr/aniseed/gene/show_gene?unique_id=Cirobu.g00008822	http://ghost.zool.kyoto-u.ac.jp/cgi-bin/fordetailkh21.cgi?name=KH.C8.208;source=kh2013
KH.C2.207	KH2013:KH.C2.207_Y106G6H.5	DMGDH; PDPR; SARDH	Cirobu.g00004384	1.50751	0.844587	0.509892	-0.571634	0.646374	0	https://www.aniseed.cnrs.fr/aniseed/gene/show_expression?unique_id=Cirobu.g00004384	https://www.aniseed.cnrs.fr/aniseed/gene/show_gene?unique_id=Cirobu.g00004384	http://ghost.zool.kyoto-u.ac.jp/cgi-bin/fordetailkh21.cgi?name=KH.C2.207;source=kh2013
KH.L11.1	CPEB2/3/4	CPEB2; CPEB3; CPEB4	Cirobu.g00010670	6.31741	0.843753	0.0305947	-0.0455479	0.910142	0	https://www.aniseed.cnrs.fr/aniseed/gene/show_expression?unique_id=Cirobu.g00010670	https://www.aniseed.cnrs.fr/aniseed/gene/show_gene?unique_id=Cirobu.g00010670	http://ghost.zool.kyoto-u.ac.jp/cgi-bin/fordetailkh21.cgi?name=KH.L11.1;source=kh2013
KH.C1.1106	KLHDC1/3	KLHDC1; KLHDC2; KLHDC3	Cirobu.g00000121	1.72307	0.842714	0.369571	0.325537	0.744131	0	https://www.aniseed.cnrs.fr/aniseed/gene/show_expression?unique_id=Cirobu.g00000121	https://www.aniseed.cnrs.fr/aniseed/gene/show_gene?unique_id=Cirobu.g00000121	http://ghost.zool.kyoto-u.ac.jp/cgi-bin/fordetailkh21.cgi?name=KH.C1.1106;source=kh2013
KH.C11.280	C5ORF49	C5orf49	Cirobu.g00002101	3.18052	0.842367	0.103547	0.590746	0.25729	0	https://www.aniseed.cnrs.fr/aniseed/gene/show_expression?unique_id=Cirobu.g00002101	https://www.aniseed.cnrs.fr/aniseed/gene/show_gene?unique_id=Cirobu.g00002101	http://ghost.zool.kyoto-u.ac.jp/cgi-bin/fordetailkh21.cgi?name=KH.C11.280;source=kh2013
KH.C12.128	ATG2B	ATG2A; ATG2B; VPS13C	Cirobu.g00002654	4.37005	0.842307	0.0247529	-0.477391	0.210699	0	https://www.aniseed.cnrs.fr/aniseed/gene/show_expression?unique_id=Cirobu.g00002654	https://www.aniseed.cnrs.fr/aniseed/gene/show_gene?unique_id=Cirobu.g00002654	http://ghost.zool.kyoto-u.ac.jp/cgi-bin/fordetailkh21.cgi?name=KH.C12.128;source=kh2013
KH.C4.105	KH2013:KH.C4.105_SARDH	DMGDH; PDPR; SARDH	Cirobu.g00006170	5.74627	0.841586	0.168045	0.12456	0.840244	0	https://www.aniseed.cnrs.fr/aniseed/gene/show_expression?unique_id=Cirobu.g00006170	https://www.aniseed.cnrs.fr/aniseed/gene/show_gene?unique_id=Cirobu.g00006170	http://ghost.zool.kyoto-u.ac.jp/cgi-bin/fordetailkh21.cgi?name=KH.C4.105;source=kh2013
KH.C5.149	MVP	MVP	Cirobu.g00007010	5.29356	0.841435	0.0507859	-0.113132	0.796536	0	https://www.aniseed.cnrs.fr/aniseed/gene/show_expression?unique_id=Cirobu.g00007010	https://www.aniseed.cnrs.fr/aniseed/gene/show_gene?unique_id=Cirobu.g00007010	http://ghost.zool.kyoto-u.ac.jp/cgi-bin/fordetailkh21.cgi?name=KH.C5.149;source=kh2013
KH.C7.74	KH2013:KH.C7.74_CNTNAP2	CNTNAP1; CNTNAP2; CNTNAP4	Cirobu.g00008616	1.09495	0.84031	0.714698	1.42127	0.523686	0	https://www.aniseed.cnrs.fr/aniseed/gene/show_expression?unique_id=Cirobu.g00008616	https://www.aniseed.cnrs.fr/aniseed/gene/show_gene?unique_id=Cirobu.g00008616	http://ghost.zool.kyoto-u.ac.jp/cgi-bin/fordetailkh21.cgi?name=KH.C7.74;source=kh2013
KH.C1.354	KH2013:KH.C1.354	KH.C1.354	Cirobu.g00000586	1.60349	0.839149	0.233473	-0.0415932	0.97816	0	https://www.aniseed.cnrs.fr/aniseed/gene/show_expression?unique_id=Cirobu.g00000586	https://www.aniseed.cnrs.fr/aniseed/gene/show_gene?unique_id=Cirobu.g00000586	http://ghost.zool.kyoto-u.ac.jp/cgi-bin/fordetailkh21.cgi?name=KH.C1.354;source=kh2013
KH.C1.228	DSD1	KH.C1.228	Cirobu.g00000446	2.06325	0.837547	0.220769	-0.479402	0.484741	0	https://www.aniseed.cnrs.fr/aniseed/gene/show_expression?unique_id=Cirobu.g00000446	https://www.aniseed.cnrs.fr/aniseed/gene/show_gene?unique_id=Cirobu.g00000446	http://ghost.zool.kyoto-u.ac.jp/cgi-bin/fordetailkh21.cgi?name=KH.C1.228;source=kh2013
KH.C2.936	4933411K20RIK	CFAP97	Cirobu.g00005181	3.79548	0.837269	0.0865212	-0.491115	0.312251	0	https://www.aniseed.cnrs.fr/aniseed/gene/show_expression?unique_id=Cirobu.g00005181	https://www.aniseed.cnrs.fr/aniseed/gene/show_gene?unique_id=Cirobu.g00005181	http://ghost.zool.kyoto-u.ac.jp/cgi-bin/fordetailkh21.cgi?name=KH.C2.936;source=kh2013
KH.C12.314	KH2013:KH.C12.314	KH.C12.314	Cirobu.g00002858	2.24151	0.837104	0.262048	0.831668	0.265297	0	https://www.aniseed.cnrs.fr/aniseed/gene/show_expression?unique_id=Cirobu.g00002858	https://www.aniseed.cnrs.fr/aniseed/gene/show_gene?unique_id=Cirobu.g00002858	http://ghost.zool.kyoto-u.ac.jp/cgi-bin/fordetailkh21.cgi?name=KH.C12.314;source=kh2013
KH.C3.566	KH2013:KH.C3.566_KIF5C	KIF5A; KIF5B; KIF5C	Cirobu.g00005755	8.88047	0.836552	0.0644505	-0.0180938	0.968344	0	https://www.aniseed.cnrs.fr/aniseed/gene/show_expression?unique_id=Cirobu.g00005755	https://www.aniseed.cnrs.fr/aniseed/gene/show_gene?unique_id=Cirobu.g00005755	http://ghost.zool.kyoto-u.ac.jp/cgi-bin/fordetailkh21.cgi?name=KH.C3.566;source=kh2013
KH.C1.138	FAM155A	FAM155A; FAM155B	Cirobu.g00000346	5.24325	0.835212	0.0177906	-0.0279181	0.936963	4	https://www.aniseed.cnrs.fr/aniseed/gene/show_expression?unique_id=Cirobu.g00000346	https://www.aniseed.cnrs.fr/aniseed/gene/show_gene?unique_id=Cirobu.g00000346	http://ghost.zool.kyoto-u.ac.jp/cgi-bin/fordetailkh21.cgi?name=KH.C1.138;source=kh2013
KH.C2.477	KH2013:KH.C2.477_DUOX-2	DUOX1; DUOX2; NOX1	Cirobu.g00004678	5.49058	0.835136	0.0178783	-0.220267	0.535989	0	https://www.aniseed.cnrs.fr/aniseed/gene/show_expression?unique_id=Cirobu.g00004678	https://www.aniseed.cnrs.fr/aniseed/gene/show_gene?unique_id=Cirobu.g00004678	http://ghost.zool.kyoto-u.ac.jp/cgi-bin/fordetailkh21.cgi?name=KH.C2.477;source=kh2013
KH.C2.92	AGFG1/2	AGFG1; AGFG2; SMAP1	Cirobu.g00005163	6.27493	0.834553	0.0237977	-0.170529	0.642717	9	https://www.aniseed.cnrs.fr/aniseed/gene/show_expression?unique_id=Cirobu.g00005163	https://www.aniseed.cnrs.fr/aniseed/gene/show_gene?unique_id=Cirobu.g00005163	http://ghost.zool.kyoto-u.ac.jp/cgi-bin/fordetailkh21.cgi?name=KH.C2.92;source=kh2013
KH.S925.3	KH2013:KH.S925.3_CG5346	KH.S925.3	Cirobu.g00015200	0.990351	0.833228	0.409087	-0.300726	0.7758	0	https://www.aniseed.cnrs.fr/aniseed/gene/show_expression?unique_id=Cirobu.g00015200	https://www.aniseed.cnrs.fr/aniseed/gene/show_gene?unique_id=Cirobu.g00015200	http://ghost.zool.kyoto-u.ac.jp/cgi-bin/fordetailkh21.cgi?name=KH.S925.3;source=kh2013
KH.C7.325	MAPRE1/2/3	MAPRE1; MAPRE2; MAPRE3	Cirobu.g00008161	5.32661	0.832933	0.0942701	-0.253836	0.611102	6	https://www.aniseed.cnrs.fr/aniseed/gene/show_expression?unique_id=Cirobu.g00008161	https://www.aniseed.cnrs.fr/aniseed/gene/show_gene?unique_id=Cirobu.g00008161	http://ghost.zool.kyoto-u.ac.jp/cgi-bin/fordetailkh21.cgi?name=KH.C7.325;source=kh2013
KH.L153.65	KH2013:KH.L153.65	KH.L153.65	Cirobu.g00011513	0.34665	0.831309	0.31073	0.625871	0.469789	1	https://www.aniseed.cnrs.fr/aniseed/gene/show_expression?unique_id=Cirobu.g00011513	https://www.aniseed.cnrs.fr/aniseed/gene/show_gene?unique_id=Cirobu.g00011513	http://ghost.zool.kyoto-u.ac.jp/cgi-bin/fordetailkh21.cgi?name=KH.L153.65;source=kh2013
KH.C9.562	EPB41L3	EPB41; EPB41L1; EPB41L3	Cirobu.g00010120	0.156535	0.830966	0.650214	0.770245	0.673498	0	https://www.aniseed.cnrs.fr/aniseed/gene/show_expression?unique_id=Cirobu.g00010120	https://www.aniseed.cnrs.fr/aniseed/gene/show_gene?unique_id=Cirobu.g00010120	http://ghost.zool.kyoto-u.ac.jp/cgi-bin/fordetailkh21.cgi?name=KH.C9.562;source=kh2013
KH.C1.1270	KH2013:KH.C1.1270	KH.C1.1270	Cirobu.g00000300	0.915397	0.828972	0.262838	0.631806	0.413539	0	https://www.aniseed.cnrs.fr/aniseed/gene/show_expression?unique_id=Cirobu.g00000300	https://www.aniseed.cnrs.fr/aniseed/gene/show_gene?unique_id=Cirobu.g00000300	http://ghost.zool.kyoto-u.ac.jp/cgi-bin/fordetailkh21.cgi?name=KH.C1.1270;source=kh2013
KH.C9.219	KH2013:KH.C9.219	KH.C9.219	Cirobu.g00009745	1.72248	0.828867	0.373699	0.347787	0.722216	0	https://www.aniseed.cnrs.fr/aniseed/gene/show_expression?unique_id=Cirobu.g00009745	https://www.aniseed.cnrs.fr/aniseed/gene/show_gene?unique_id=Cirobu.g00009745	http://ghost.zool.kyoto-u.ac.jp/cgi-bin/fordetailkh21.cgi?name=KH.C9.219;source=kh2013
KH.C8.780	KIAA0528	C2CD5; RASA4; RASA4B	Cirobu.g00009448	2.7818	0.828284	0.13349	-0.107459	0.868092	0	https://www.aniseed.cnrs.fr/aniseed/gene/show_expression?unique_id=Cirobu.g00009448	https://www.aniseed.cnrs.fr/aniseed/gene/show_gene?unique_id=Cirobu.g00009448	http://ghost.zool.kyoto-u.ac.jp/cgi-bin/fordetailkh21.cgi?name=KH.C8.780;source=kh2013
KH.C4.781	KH2013:KH.C4.781	KH.C4.781	Cirobu.g00006904	0.772242	0.828258	0.268721	0.0300026	1	0	https://www.aniseed.cnrs.fr/aniseed/gene/show_expression?unique_id=Cirobu.g00006904	https://www.aniseed.cnrs.fr/aniseed/gene/show_gene?unique_id=Cirobu.g00006904	http://ghost.zool.kyoto-u.ac.jp/cgi-bin/fordetailkh21.cgi?name=KH.C4.781;source=kh2013
KH.C4.94	SI:CH211-202H22.8/9	CDIP1; LITAF	Cirobu.g00006951	4.84066	0.827784	0.132477	-0.291978	0.597718	4	https://www.aniseed.cnrs.fr/aniseed/gene/show_expression?unique_id=Cirobu.g00006951	https://www.aniseed.cnrs.fr/aniseed/gene/show_gene?unique_id=Cirobu.g00006951	http://ghost.zool.kyoto-u.ac.jp/cgi-bin/fordetailkh21.cgi?name=KH.C4.94;source=kh2013
KH.C8.20	RPL38	RPL38	Cirobu.g00008813	1.03432	0.826393	0.260247	0.343443	0.657815	1	https://www.aniseed.cnrs.fr/aniseed/gene/show_expression?unique_id=Cirobu.g00008813	https://www.aniseed.cnrs.fr/aniseed/gene/show_gene?unique_id=Cirobu.g00008813	http://ghost.zool.kyoto-u.ac.jp/cgi-bin/fordetailkh21.cgi?name=KH.C8.20;source=kh2013
KH.C3.699	ABCG1/4	ABCG1; ABCG2; ABCG4	Cirobu.g00005898	7.04179	0.826154	0.119184	-0.478979	0.366324	3	https://www.aniseed.cnrs.fr/aniseed/gene/show_expression?unique_id=Cirobu.g00005898	https://www.aniseed.cnrs.fr/aniseed/gene/show_gene?unique_id=Cirobu.g00005898	http://ghost.zool.kyoto-u.ac.jp/cgi-bin/fordetailkh21.cgi?name=KH.C3.699;source=kh2013
KH.C9.502	KH2013:KH.C9.502_SEC14	CLVS1; TTPA; TTPAL	Cirobu.g00010055	2.93473	0.826115	0.178967	-0.191219	0.764651	0	https://www.aniseed.cnrs.fr/aniseed/gene/show_expression?unique_id=Cirobu.g00010055	https://www.aniseed.cnrs.fr/aniseed/gene/show_gene?unique_id=Cirobu.g00010055	http://ghost.zool.kyoto-u.ac.jp/cgi-bin/fordetailkh21.cgi?name=KH.C9.502;source=kh2013
KH.C4.456	MYADML2	MYADML2	Cirobu.g00006549	0.68995	0.824128	0.319789	-0.043451	0.962971	0	https://www.aniseed.cnrs.fr/aniseed/gene/show_expression?unique_id=Cirobu.g00006549	https://www.aniseed.cnrs.fr/aniseed/gene/show_gene?unique_id=Cirobu.g00006549	http://ghost.zool.kyoto-u.ac.jp/cgi-bin/fordetailkh21.cgi?name=KH.C4.456;source=kh2013
KH.C14.122	KH2013:KH.C14.122	KH.C14.122	Cirobu.g00003531	3.45375	0.82371	0.302455	0.151479	0.854051	0	https://www.aniseed.cnrs.fr/aniseed/gene/show_expression?unique_id=Cirobu.g00003531	https://www.aniseed.cnrs.fr/aniseed/gene/show_gene?unique_id=Cirobu.g00003531	http://ghost.zool.kyoto-u.ac.jp/cgi-bin/fordetailkh21.cgi?name=KH.C14.122;source=kh2013
KH.L141.73	KH2013:KH.L141.73	KH.L141.73	Cirobu.g00011230	0.559791	0.822684	0.351047	1.14619	0.217474	0	https://www.aniseed.cnrs.fr/aniseed/gene/show_expression?unique_id=Cirobu.g00011230	https://www.aniseed.cnrs.fr/aniseed/gene/show_gene?unique_id=Cirobu.g00011230	http://ghost.zool.kyoto-u.ac.jp/cgi-bin/fordetailkh21.cgi?name=KH.L141.73;source=kh2013
KH.C4.448	GSTCD	GSTCD	Cirobu.g00006540	2.04605	0.821985	0.231463	0.678558	0.327693	0	https://www.aniseed.cnrs.fr/aniseed/gene/show_expression?unique_id=Cirobu.g00006540	https://www.aniseed.cnrs.fr/aniseed/gene/show_gene?unique_id=Cirobu.g00006540	http://ghost.zool.kyoto-u.ac.jp/cgi-bin/fordetailkh21.cgi?name=KH.C4.448;source=kh2013
KH.L19.4	RECK	RECK	Cirobu.g00012052	6.40929	0.82182	0.152925	-0.281048	0.62573	2	https://www.aniseed.cnrs.fr/aniseed/gene/show_expression?unique_id=Cirobu.g00012052	https://www.aniseed.cnrs.fr/aniseed/gene/show_gene?unique_id=Cirobu.g00012052	http://ghost.zool.kyoto-u.ac.jp/cgi-bin/fordetailkh21.cgi?name=KH.L19.4;source=kh2013
KH.L18.104	KH2013:KH.L18.104	KH.L18.104	Cirobu.g00011908	3.01144	0.821547	0.327926	2.12297	0.0141807	0	https://www.aniseed.cnrs.fr/aniseed/gene/show_expression?unique_id=Cirobu.g00011908	https://www.aniseed.cnrs.fr/aniseed/gene/show_gene?unique_id=Cirobu.g00011908	http://ghost.zool.kyoto-u.ac.jp/cgi-bin/fordetailkh21.cgi?name=KH.L18.104;source=kh2013
KH.C1.123	KH2013:KH.C1.123_KLHL12/2	KLHL12; KLHL2; KLHL3	Cirobu.g00000255	2.34105	0.821044	0.166947	0.308827	0.600086	0	https://www.aniseed.cnrs.fr/aniseed/gene/show_expression?unique_id=Cirobu.g00000255	https://www.aniseed.cnrs.fr/aniseed/gene/show_gene?unique_id=Cirobu.g00000255	http://ghost.zool.kyoto-u.ac.jp/cgi-bin/fordetailkh21.cgi?name=KH.C1.123;source=kh2013
KH.C1.1196	CG32054	KH.C1.1196	Cirobu.g00000218	5.55881	0.820792	0.0129886	0.194025	0.560054	0	https://www.aniseed.cnrs.fr/aniseed/gene/show_expression?unique_id=Cirobu.g00000218	https://www.aniseed.cnrs.fr/aniseed/gene/show_gene?unique_id=Cirobu.g00000218	http://ghost.zool.kyoto-u.ac.jp/cgi-bin/fordetailkh21.cgi?name=KH.C1.1196;source=kh2013
KH.C3.602	WDR45	WDR45; WDR45B; WIPI1	Cirobu.g00005796	4.24186	0.820666	0.0767021	0.501215	0.280421	1	https://www.aniseed.cnrs.fr/aniseed/gene/show_expression?unique_id=Cirobu.g00005796	https://www.aniseed.cnrs.fr/aniseed/gene/show_gene?unique_id=Cirobu.g00005796	http://ghost.zool.kyoto-u.ac.jp/cgi-bin/fordetailkh21.cgi?name=KH.C3.602;source=kh2013
KH.C8.812	KH2013:KH.C8.812	TCTE3; TCTEX1D1; TCTEX1D2	Cirobu.g00009483	0.896832	0.820489	0.606268	-0.227367	0.89368	0	https://www.aniseed.cnrs.fr/aniseed/gene/show_expression?unique_id=Cirobu.g00009483	https://www.aniseed.cnrs.fr/aniseed/gene/show_gene?unique_id=Cirobu.g00009483	http://ghost.zool.kyoto-u.ac.jp/cgi-bin/fordetailkh21.cgi?name=KH.C8.812;source=kh2013
KH.C7.465	KH2013:KH.C7.465_SULT6B1	SULT1C3; SULT1C4; SULT6B1	Cirobu.g00008314	5.96682	0.819375	0.325535	0.500536	0.547549	0	https://www.aniseed.cnrs.fr/aniseed/gene/show_expression?unique_id=Cirobu.g00008314	https://www.aniseed.cnrs.fr/aniseed/gene/show_gene?unique_id=Cirobu.g00008314	http://ghost.zool.kyoto-u.ac.jp/cgi-bin/fordetailkh21.cgi?name=KH.C7.465;source=kh2013
KH.L170.20	NRF1	NRF1	Cirobu.g00011755	2.97047	0.818961	0.121655	-0.14463	0.802906	0	https://www.aniseed.cnrs.fr/aniseed/gene/show_expression?unique_id=Cirobu.g00011755	https://www.aniseed.cnrs.fr/aniseed/gene/show_gene?unique_id=Cirobu.g00011755	http://ghost.zool.kyoto-u.ac.jp/cgi-bin/fordetailkh21.cgi?name=KH.L170.20;source=kh2013
KH.C5.98	ATP6AP1	ATP6AP1; ATP6AP1L	Cirobu.g00007611	7.29039	0.818443	0.0158332	0.0368123	0.913583	0	https://www.aniseed.cnrs.fr/aniseed/gene/show_expression?unique_id=Cirobu.g00007611	https://www.aniseed.cnrs.fr/aniseed/gene/show_gene?unique_id=Cirobu.g00007611	http://ghost.zool.kyoto-u.ac.jp/cgi-bin/fordetailkh21.cgi?name=KH.C5.98;source=kh2013
KH.C13.100	TRAK1/2	HAP1; TRAK1; TRAK2	Cirobu.g00003312	5.7958	0.816982	0.039515	0.133244	0.735602	0	https://www.aniseed.cnrs.fr/aniseed/gene/show_expression?unique_id=Cirobu.g00003312	https://www.aniseed.cnrs.fr/aniseed/gene/show_gene?unique_id=Cirobu.g00003312	http://ghost.zool.kyoto-u.ac.jp/cgi-bin/fordetailkh21.cgi?name=KH.C13.100;source=kh2013
KH.L42.2	OTOA	OTOA; STRC	Cirobu.g00012639	1.17814	0.814386	0.37249	0.108379	0.932241	0	https://www.aniseed.cnrs.fr/aniseed/gene/show_expression?unique_id=Cirobu.g00012639	https://www.aniseed.cnrs.fr/aniseed/gene/show_gene?unique_id=Cirobu.g00012639	http://ghost.zool.kyoto-u.ac.jp/cgi-bin/fordetailkh21.cgi?name=KH.L42.2;source=kh2013
KH.C1.211	SYX-7	STX12; STX1A; STX7	Cirobu.g00000428	4.60623	0.813175	0.033996	-0.0667789	0.870563	0	https://www.aniseed.cnrs.fr/aniseed/gene/show_expression?unique_id=Cirobu.g00000428	https://www.aniseed.cnrs.fr/aniseed/gene/show_gene?unique_id=Cirobu.g00000428	http://ghost.zool.kyoto-u.ac.jp/cgi-bin/fordetailkh21.cgi?name=KH.C1.211;source=kh2013
KH.C14.127	KH2013:KH.C14.127_LPGAT1	LPGAT1	Cirobu.g00003536	3.25369	0.812685	0.196705	-0.490729	0.438749	0	https://www.aniseed.cnrs.fr/aniseed/gene/show_expression?unique_id=Cirobu.g00003536	https://www.aniseed.cnrs.fr/aniseed/gene/show_gene?unique_id=Cirobu.g00003536	http://ghost.zool.kyoto-u.ac.jp/cgi-bin/fordetailkh21.cgi?name=KH.C14.127;source=kh2013
KH.L167.2	TMPRSS13/2/3/4/5	F11; KLKB1; TMPRSS3	Cirobu.g00011710	0.935242	0.809879	0.574839	-0.628716	0.654963	0	https://www.aniseed.cnrs.fr/aniseed/gene/show_expression?unique_id=Cirobu.g00011710	https://www.aniseed.cnrs.fr/aniseed/gene/show_gene?unique_id=Cirobu.g00011710	http://ghost.zool.kyoto-u.ac.jp/cgi-bin/fordetailkh21.cgi?name=KH.L167.2;source=kh2013
KH.C5.187	KH2013:KH.C5.187	TCTE3; TCTEX1D1	Cirobu.g00007051	1.25432	0.809871	0.345725	-0.559514	0.526233	0	https://www.aniseed.cnrs.fr/aniseed/gene/show_expression?unique_id=Cirobu.g00007051	https://www.aniseed.cnrs.fr/aniseed/gene/show_gene?unique_id=Cirobu.g00007051	http://ghost.zool.kyoto-u.ac.jp/cgi-bin/fordetailkh21.cgi?name=KH.C5.187;source=kh2013
KH.L108.50	RAD1/17	RAD1	Cirobu.g00010647	4.27165	0.809589	0.106657	0.320725	0.523567	0	https://www.aniseed.cnrs.fr/aniseed/gene/show_expression?unique_id=Cirobu.g00010647	https://www.aniseed.cnrs.fr/aniseed/gene/show_gene?unique_id=Cirobu.g00010647	http://ghost.zool.kyoto-u.ac.jp/cgi-bin/fordetailkh21.cgi?name=KH.L108.50;source=kh2013
KH.C13.20	KH2013:KH.C13.20_CU638714.2	SLC22A13; SLC22A4; SLC22A5	Cirobu.g00003421	1.09305	0.809288	0.37753	1.08136	0.243863	0	https://www.aniseed.cnrs.fr/aniseed/gene/show_expression?unique_id=Cirobu.g00003421	https://www.aniseed.cnrs.fr/aniseed/gene/show_gene?unique_id=Cirobu.g00003421	http://ghost.zool.kyoto-u.ac.jp/cgi-bin/fordetailkh21.cgi?name=KH.C13.20;source=kh2013
KH.S1386.2	KH2013:KH.S1386.2_VCAM1	KH.S1386.2	Cirobu.g00013842	2.35347	0.808829	0.144571	0.496751	0.381151	0	https://www.aniseed.cnrs.fr/aniseed/gene/show_expression?unique_id=Cirobu.g00013842	https://www.aniseed.cnrs.fr/aniseed/gene/show_gene?unique_id=Cirobu.g00013842	http://ghost.zool.kyoto-u.ac.jp/cgi-bin/fordetailkh21.cgi?name=KH.S1386.2;source=kh2013
KH.S643.3	KH2013:KH.S643.3	KH.S643.3	Cirobu.g00014860	0.350219	0.808693	0.351178	-0.862175	0.378874	0	https://www.aniseed.cnrs.fr/aniseed/gene/show_expression?unique_id=Cirobu.g00014860	https://www.aniseed.cnrs.fr/aniseed/gene/show_gene?unique_id=Cirobu.g00014860	http://ghost.zool.kyoto-u.ac.jp/cgi-bin/fordetailkh21.cgi?name=KH.S643.3;source=kh2013
KH.L59.6	KH2013:KH.L59.6_NFU1	NFU1	Cirobu.g00012841	4.44262	0.808357	0.0579353	-0.531115	0.211859	0	https://www.aniseed.cnrs.fr/aniseed/gene/show_expression?unique_id=Cirobu.g00012841	https://www.aniseed.cnrs.fr/aniseed/gene/show_gene?unique_id=Cirobu.g00012841	http://ghost.zool.kyoto-u.ac.jp/cgi-bin/fordetailkh21.cgi?name=KH.L59.6;source=kh2013
KH.C2.7	KH2013:KH.C2.7	KH.C2.7	Cirobu.g00004922	1.62764	0.808296	0.550638	0.529917	0.706008	0	https://www.aniseed.cnrs.fr/aniseed/gene/show_expression?unique_id=Cirobu.g00004922	https://www.aniseed.cnrs.fr/aniseed/gene/show_gene?unique_id=Cirobu.g00004922	http://ghost.zool.kyoto-u.ac.jp/cgi-bin/fordetailkh21.cgi?name=KH.C2.7;source=kh2013
KH.L87.42	PLEKHD1	PLEKHD1; SWAP70	Cirobu.g00013204	2.99734	0.808043	0.281426	1.04541	0.167637	0	https://www.aniseed.cnrs.fr/aniseed/gene/show_expression?unique_id=Cirobu.g00013204	https://www.aniseed.cnrs.fr/aniseed/gene/show_gene?unique_id=Cirobu.g00013204	http://ghost.zool.kyoto-u.ac.jp/cgi-bin/fordetailkh21.cgi?name=KH.L87.42;source=kh2013
KH.C5.84	KH2013:KH.C5.84	KH.C5.84	Cirobu.g00007596	3.1145	0.807258	0.106129	-0.347403	0.494288	0	https://www.aniseed.cnrs.fr/aniseed/gene/show_expression?unique_id=Cirobu.g00007596	https://www.aniseed.cnrs.fr/aniseed/gene/show_gene?unique_id=Cirobu.g00007596	http://ghost.zool.kyoto-u.ac.jp/cgi-bin/fordetailkh21.cgi?name=KH.C5.84;source=kh2013
KH.L22.55	KH2013:KH.L22.55_PPK/23	ASIC1; ASIC3; ASIC5	Cirobu.g00012171	1.96887	0.806851	0.195903	-0.00940689	1	0	https://www.aniseed.cnrs.fr/aniseed/gene/show_expression?unique_id=Cirobu.g00012171	https://www.aniseed.cnrs.fr/aniseed/gene/show_gene?unique_id=Cirobu.g00012171	http://ghost.zool.kyoto-u.ac.jp/cgi-bin/fordetailkh21.cgi?name=KH.L22.55;source=kh2013
KH.C7.214	LMBR1	LMBR1; LMBR1L	Cirobu.g00008041	6.68014	0.806654	0.015513	-0.208646	0.530629	4	https://www.aniseed.cnrs.fr/aniseed/gene/show_expression?unique_id=Cirobu.g00008041	https://www.aniseed.cnrs.fr/aniseed/gene/show_gene?unique_id=Cirobu.g00008041	http://ghost.zool.kyoto-u.ac.jp/cgi-bin/fordetailkh21.cgi?name=KH.C7.214;source=kh2013
KH.S164.23	EIF4E3	EIF4E; EIF4E2; EIF4E3	Cirobu.g00014001	3.79956	0.806497	0.308874	0.0702685	0.939499	1	https://www.aniseed.cnrs.fr/aniseed/gene/show_expression?unique_id=Cirobu.g00014001	https://www.aniseed.cnrs.fr/aniseed/gene/show_gene?unique_id=Cirobu.g00014001	http://ghost.zool.kyoto-u.ac.jp/cgi-bin/fordetailkh21.cgi?name=KH.S164.23;source=kh2013
KH.C9.39	GAPVD1	GAPVD1; RABGEF1; RIN3	Cirobu.g00009930	3.66853	0.806268	0.0719621	0.0238109	0.953368	0	https://www.aniseed.cnrs.fr/aniseed/gene/show_expression?unique_id=Cirobu.g00009930	https://www.aniseed.cnrs.fr/aniseed/gene/show_gene?unique_id=Cirobu.g00009930	http://ghost.zool.kyoto-u.ac.jp/cgi-bin/fordetailkh21.cgi?name=KH.C9.39;source=kh2013
KH.C9.230	KH2013:KH.C9.230_SLIT2	LRRC15; SLIT2; SLIT3	Cirobu.g00009757	0.367464	0.806263	0.609687	-0.759732	0.642127	0	https://www.aniseed.cnrs.fr/aniseed/gene/show_expression?unique_id=Cirobu.g00009757	https://www.aniseed.cnrs.fr/aniseed/gene/show_gene?unique_id=Cirobu.g00009757	http://ghost.zool.kyoto-u.ac.jp/cgi-bin/fordetailkh21.cgi?name=KH.C9.230;source=kh2013
KH.L152.26	SCD/1/2/3/4/5	SCD; SCD5	Cirobu.g00011403	0.661644	0.805884	0.362772	0.164836	0.900626	0	https://www.aniseed.cnrs.fr/aniseed/gene/show_expression?unique_id=Cirobu.g00011403	https://www.aniseed.cnrs.fr/aniseed/gene/show_gene?unique_id=Cirobu.g00011403	http://ghost.zool.kyoto-u.ac.jp/cgi-bin/fordetailkh21.cgi?name=KH.L152.26;source=kh2013
KH.L65.3	CLASP1/2	CLASP1; CLASP2; TOGARAM1	Cirobu.g00012937	7.56021	0.805884	0.0663503	-0.437644	0.317329	6	https://www.aniseed.cnrs.fr/aniseed/gene/show_expression?unique_id=Cirobu.g00012937	https://www.aniseed.cnrs.fr/aniseed/gene/show_gene?unique_id=Cirobu.g00012937	http://ghost.zool.kyoto-u.ac.jp/cgi-bin/fordetailkh21.cgi?name=KH.L65.3;source=kh2013
KH.C11.683	KH2013:KH.C11.683	COCH; CRISPLD1; CRISPLD2	Cirobu.g00002536	1.04695	0.805035	0.277643	0.719425	0.334561	0	https://www.aniseed.cnrs.fr/aniseed/gene/show_expression?unique_id=Cirobu.g00002536	https://www.aniseed.cnrs.fr/aniseed/gene/show_gene?unique_id=Cirobu.g00002536	http://ghost.zool.kyoto-u.ac.jp/cgi-bin/fordetailkh21.cgi?name=KH.C11.683;source=kh2013
KH.L144.16	BLOC1S1	AC009779.3; BLOC1S1	Cirobu.g00011270	3.56119	0.804465	0.0810959	0.231976	0.621046	0	https://www.aniseed.cnrs.fr/aniseed/gene/show_expression?unique_id=Cirobu.g00011270	https://www.aniseed.cnrs.fr/aniseed/gene/show_gene?unique_id=Cirobu.g00011270	http://ghost.zool.kyoto-u.ac.jp/cgi-bin/fordetailkh21.cgi?name=KH.L144.16;source=kh2013
KH.C8.743	KH2013:KH.C8.743	KH.C8.743	Cirobu.g00009407	2.83995	0.80427	0.353557	-0.642561	0.470091	2	https://www.aniseed.cnrs.fr/aniseed/gene/show_expression?unique_id=Cirobu.g00009407	https://www.aniseed.cnrs.fr/aniseed/gene/show_gene?unique_id=Cirobu.g00009407	http://ghost.zool.kyoto-u.ac.jp/cgi-bin/fordetailkh21.cgi?name=KH.C8.743;source=kh2013
KH.S1202.1	KH2013:KH.S1202.1_CR762486.1	GIN1; KRBA2; NYNRIN	Cirobu.g00013696	1.1803	0.802151	0.278827	-0.0932517	0.944171	0	https://www.aniseed.cnrs.fr/aniseed/gene/show_expression?unique_id=Cirobu.g00013696	https://www.aniseed.cnrs.fr/aniseed/gene/show_gene?unique_id=Cirobu.g00013696	http://ghost.zool.kyoto-u.ac.jp/cgi-bin/fordetailkh21.cgi?name=KH.S1202.1;source=kh2013
KH.S1776.1	KH2013:KH.S1776.1	KH.S1776.1	Cirobu.g00014070	1.57292	0.801766	0.433653	0.222335	0.841126	0	https://www.aniseed.cnrs.fr/aniseed/gene/show_expression?unique_id=Cirobu.g00014070	https://www.aniseed.cnrs.fr/aniseed/gene/show_gene?unique_id=Cirobu.g00014070	http://ghost.zool.kyoto-u.ac.jp/cgi-bin/fordetailkh21.cgi?name=KH.S1776.1;source=kh2013
KH.C7.408	TMEM65	TMEM65	Cirobu.g00008252	4.2165	0.801558	0.0578265	0.0973656	0.823489	0	https://www.aniseed.cnrs.fr/aniseed/gene/show_expression?unique_id=Cirobu.g00008252	https://www.aniseed.cnrs.fr/aniseed/gene/show_gene?unique_id=Cirobu.g00008252	http://ghost.zool.kyoto-u.ac.jp/cgi-bin/fordetailkh21.cgi?name=KH.C7.408;source=kh2013
KH.C14.199	ZC2HC1A	ZC2HC1A; ZC2HC1B; ZC2HC1C	Cirobu.g00003613	2.9523	0.801535	0.100999	0.0217204	0.976461	9	https://www.aniseed.cnrs.fr/aniseed/gene/show_expression?unique_id=Cirobu.g00003613	https://www.aniseed.cnrs.fr/aniseed/gene/show_gene?unique_id=Cirobu.g00003613	http://ghost.zool.kyoto-u.ac.jp/cgi-bin/fordetailkh21.cgi?name=KH.C14.199;source=kh2013
KH.C3.52	KH2013:KH.C3.52_EFNA1/2/3/4/5	EFNA1; EFNB1; EFNB3	Cirobu.g00005705	3.43842	0.801342	0.122238	-0.0341578	0.960103	12	https://www.aniseed.cnrs.fr/aniseed/gene/show_expression?unique_id=Cirobu.g00005705	https://www.aniseed.cnrs.fr/aniseed/gene/show_gene?unique_id=Cirobu.g00005705	http://ghost.zool.kyoto-u.ac.jp/cgi-bin/fordetailkh21.cgi?name=KH.C3.52;source=kh2013
KH.C3.622	ATP6V0D1	ATP6V0D1; ATP6V0D2	Cirobu.g00005817	6.34768	0.801342	0.0177822	-0.12929	0.702661	1	https://www.aniseed.cnrs.fr/aniseed/gene/show_expression?unique_id=Cirobu.g00005817	https://www.aniseed.cnrs.fr/aniseed/gene/show_gene?unique_id=Cirobu.g00005817	http://ghost.zool.kyoto-u.ac.jp/cgi-bin/fordetailkh21.cgi?name=KH.C3.622;source=kh2013
KH.C1.180	FAM13A	ARHGAP4; FAM13A; FAM13B	Cirobu.g00000393	5.45299	0.800831	0.0769477	-0.461922	0.307121	0	https://www.aniseed.cnrs.fr/aniseed/gene/show_expression?unique_id=Cirobu.g00000393	https://www.aniseed.cnrs.fr/aniseed/gene/show_gene?unique_id=Cirobu.g00000393	http://ghost.zool.kyoto-u.ac.jp/cgi-bin/fordetailkh21.cgi?name=KH.C1.180;source=kh2013
KH.L150.1	KH2013:KH.L150.1_CDC42	CDC42; RHOJ; RHOQ	Cirobu.g00011374	4.0701	0.80041	0.0517923	0.413562	0.320593	4	https://www.aniseed.cnrs.fr/aniseed/gene/show_expression?unique_id=Cirobu.g00011374	https://www.aniseed.cnrs.fr/aniseed/gene/show_gene?unique_id=Cirobu.g00011374	http://ghost.zool.kyoto-u.ac.jp/cgi-bin/fordetailkh21.cgi?name=KH.L150.1;source=kh2013
KH.C8.270	TBCA	TBCA	Cirobu.g00008891	5.14888	0.800319	0.0189501	-0.273634	0.429497	0	https://www.aniseed.cnrs.fr/aniseed/gene/show_expression?unique_id=Cirobu.g00008891	https://www.aniseed.cnrs.fr/aniseed/gene/show_gene?unique_id=Cirobu.g00008891	http://ghost.zool.kyoto-u.ac.jp/cgi-bin/fordetailkh21.cgi?name=KH.C8.270;source=kh2013
KH.C1.404	EPH	EPHA4; EPHB1; EPHB3	Cirobu.g00000642	6.02759	0.799397	0.0447143	-0.863187	0.030816	14	https://www.aniseed.cnrs.fr/aniseed/gene/show_expression?unique_id=Cirobu.g00000642	https://www.aniseed.cnrs.fr/aniseed/gene/show_gene?unique_id=Cirobu.g00000642	http://ghost.zool.kyoto-u.ac.jp/cgi-bin/fordetailkh21.cgi?name=KH.C1.404;source=kh2013
KH.C13.120	ATP6V1G1/2/3	ATP6V1G1; ATP6V1G2	Cirobu.g00003334	5.88319	0.799033	0.0193975	0.456897	0.180853	4	https://www.aniseed.cnrs.fr/aniseed/gene/show_expression?unique_id=Cirobu.g00003334	https://www.aniseed.cnrs.fr/aniseed/gene/show_gene?unique_id=Cirobu.g00003334	http://ghost.zool.kyoto-u.ac.jp/cgi-bin/fordetailkh21.cgi?name=KH.C13.120;source=kh2013
KH.C7.707	CAPN5A	CAPN5; CAPN6; CAPN9	Cirobu.g00008580	2.25551	0.798912	0.385285	0.882225	0.346887	0	https://www.aniseed.cnrs.fr/aniseed/gene/show_expression?unique_id=Cirobu.g00008580	https://www.aniseed.cnrs.fr/aniseed/gene/show_gene?unique_id=Cirobu.g00008580	http://ghost.zool.kyoto-u.ac.jp/cgi-bin/fordetailkh21.cgi?name=KH.C7.707;source=kh2013
KH.L10.1	GCH1/2	GCH1	Cirobu.g00010499	4.60137	0.798422	0.0314667	-0.206429	0.588742	3	https://www.aniseed.cnrs.fr/aniseed/gene/show_expression?unique_id=Cirobu.g00010499	https://www.aniseed.cnrs.fr/aniseed/gene/show_gene?unique_id=Cirobu.g00010499	http://ghost.zool.kyoto-u.ac.jp/cgi-bin/fordetailkh21.cgi?name=KH.L10.1;source=kh2013
KH.C1.1182	RCC2	HERC2; RCC2	Cirobu.g00000203	5.75458	0.797777	0.0527739	-0.242901	0.553145	0	https://www.aniseed.cnrs.fr/aniseed/gene/show_expression?unique_id=Cirobu.g00000203	https://www.aniseed.cnrs.fr/aniseed/gene/show_gene?unique_id=Cirobu.g00000203	http://ghost.zool.kyoto-u.ac.jp/cgi-bin/fordetailkh21.cgi?name=KH.C1.1182;source=kh2013
KH.L96.6	KH2013:KH.L96.6_GNG10/12/2/3/4/5/7/8	GNG12; GNG5; GNG7	Cirobu.g00013405	6.79007	0.797542	0.316208	-0.774146	0.331821	0	https://www.aniseed.cnrs.fr/aniseed/gene/show_expression?unique_id=Cirobu.g00013405	https://www.aniseed.cnrs.fr/aniseed/gene/show_gene?unique_id=Cirobu.g00013405	http://ghost.zool.kyoto-u.ac.jp/cgi-bin/fordetailkh21.cgi?name=KH.L96.6;source=kh2013
KH.L50.10	NAPB	NAPA; NAPB	Cirobu.g00012726	6.89067	0.797449	0.0464312	0.180505	0.651826	0	https://www.aniseed.cnrs.fr/aniseed/gene/show_expression?unique_id=Cirobu.g00012726	https://www.aniseed.cnrs.fr/aniseed/gene/show_gene?unique_id=Cirobu.g00012726	http://ghost.zool.kyoto-u.ac.jp/cgi-bin/fordetailkh21.cgi?name=KH.L50.10;source=kh2013
KH.C9.379	KH2013:KH.C9.379_TRPC5	TRPC1; TRPC4; TRPC5	Cirobu.g00009918	2.35297	0.797049	0.433032	0.547584	0.604534	0	https://www.aniseed.cnrs.fr/aniseed/gene/show_expression?unique_id=Cirobu.g00009918	https://www.aniseed.cnrs.fr/aniseed/gene/show_gene?unique_id=Cirobu.g00009918	http://ghost.zool.kyoto-u.ac.jp/cgi-bin/fordetailkh21.cgi?name=KH.C9.379;source=kh2013
KH.C2.588	KH2013:KH.C2.588_SULF1/2	GNS; SULF1; SULF2	Cirobu.g00004801	7.2789	0.796153	0.0275834	-0.0742243	0.836434	1	https://www.aniseed.cnrs.fr/aniseed/gene/show_expression?unique_id=Cirobu.g00004801	https://www.aniseed.cnrs.fr/aniseed/gene/show_gene?unique_id=Cirobu.g00004801	http://ghost.zool.kyoto-u.ac.jp/cgi-bin/fordetailkh21.cgi?name=KH.C2.588;source=kh2013
KH.S1598.2	FIS1	KH.S1598.2	Cirobu.g00013974	5.13679	0.796081	0.0166212	-0.20966	0.530989	0	https://www.aniseed.cnrs.fr/aniseed/gene/show_expression?unique_id=Cirobu.g00013974	https://www.aniseed.cnrs.fr/aniseed/gene/show_gene?unique_id=Cirobu.g00013974	http://ghost.zool.kyoto-u.ac.jp/cgi-bin/fordetailkh21.cgi?name=KH.S1598.2;source=kh2013
KH.L126.10	MYO5B	MYO5A; MYO5B; MYO5C	Cirobu.g00010939	6.20545	0.795374	0.066125	0.00114745	1	0	https://www.aniseed.cnrs.fr/aniseed/gene/show_expression?unique_id=Cirobu.g00010939	https://www.aniseed.cnrs.fr/aniseed/gene/show_gene?unique_id=Cirobu.g00010939	http://ghost.zool.kyoto-u.ac.jp/cgi-bin/fordetailkh21.cgi?name=KH.L126.10;source=kh2013
KH.C8.718	CG3552	GDPGP1	Cirobu.g00009379	4.85086	0.795075	0.0326971	-0.394073	0.291247	0	https://www.aniseed.cnrs.fr/aniseed/gene/show_expression?unique_id=Cirobu.g00009379	https://www.aniseed.cnrs.fr/aniseed/gene/show_gene?unique_id=Cirobu.g00009379	http://ghost.zool.kyoto-u.ac.jp/cgi-bin/fordetailkh21.cgi?name=KH.C8.718;source=kh2013
KH.C9.224	BCMO1	BCO1; BCO2; RPE65	Cirobu.g00009750	7.68957	0.793723	0.0849336	-0.755094	0.10141	27	https://www.aniseed.cnrs.fr/aniseed/gene/show_expression?unique_id=Cirobu.g00009750	https://www.aniseed.cnrs.fr/aniseed/gene/show_gene?unique_id=Cirobu.g00009750	http://ghost.zool.kyoto-u.ac.jp/cgi-bin/fordetailkh21.cgi?name=KH.C9.224;source=kh2013
KH.C12.73	SKP1	AC104109.3; ELOC; SKP1	Cirobu.g00003281	5.27031	0.791992	0.0177923	0.090188	0.787692	0	https://www.aniseed.cnrs.fr/aniseed/gene/show_expression?unique_id=Cirobu.g00003281	https://www.aniseed.cnrs.fr/aniseed/gene/show_gene?unique_id=Cirobu.g00003281	http://ghost.zool.kyoto-u.ac.jp/cgi-bin/fordetailkh21.cgi?name=KH.C12.73;source=kh2013
KH.C10.20	KH2013:KH.C10.20_MIF	DDT; MIF	Cirobu.g00001401	-0.0613567	0.791796	0.428618	1.63089	0.0913943	0	https://www.aniseed.cnrs.fr/aniseed/gene/show_expression?unique_id=Cirobu.g00001401	https://www.aniseed.cnrs.fr/aniseed/gene/show_gene?unique_id=Cirobu.g00001401	http://ghost.zool.kyoto-u.ac.jp/cgi-bin/fordetailkh21.cgi?name=KH.C10.20;source=kh2013
KH.C2.36	FTMT	FTH1; FTHL17; FTMT	Cirobu.g00004549	9.20732	0.790415	0.0202855	0.0796937	0.814162	9	https://www.aniseed.cnrs.fr/aniseed/gene/show_expression?unique_id=Cirobu.g00004549	https://www.aniseed.cnrs.fr/aniseed/gene/show_gene?unique_id=Cirobu.g00004549	http://ghost.zool.kyoto-u.ac.jp/cgi-bin/fordetailkh21.cgi?name=KH.C2.36;source=kh2013
KH.L116.9	TTC36	TTC32; TTC36; TTC6	Cirobu.g00010824	4.49108	0.789269	0.0366923	0.267875	0.479603	0	https://www.aniseed.cnrs.fr/aniseed/gene/show_expression?unique_id=Cirobu.g00010824	https://www.aniseed.cnrs.fr/aniseed/gene/show_gene?unique_id=Cirobu.g00010824	http://ghost.zool.kyoto-u.ac.jp/cgi-bin/fordetailkh21.cgi?name=KH.L116.9;source=kh2013
KH.C11.125	SEMA3E	SEMA3B; SEMA3D; SEMA4G	Cirobu.g00001932	5.98698	0.787995	0.0314434	0.0265326	0.944921	0	https://www.aniseed.cnrs.fr/aniseed/gene/show_expression?unique_id=Cirobu.g00001932	https://www.aniseed.cnrs.fr/aniseed/gene/show_gene?unique_id=Cirobu.g00001932	http://ghost.zool.kyoto-u.ac.jp/cgi-bin/fordetailkh21.cgi?name=KH.C11.125;source=kh2013
KH.C13.25	KH2013:KH.C13.25_GCLM	AKR1C3; GCLM	Cirobu.g00003425	3.71516	0.78759	0.112287	-0.680516	0.170281	0	https://www.aniseed.cnrs.fr/aniseed/gene/show_expression?unique_id=Cirobu.g00003425	https://www.aniseed.cnrs.fr/aniseed/gene/show_gene?unique_id=Cirobu.g00003425	http://ghost.zool.kyoto-u.ac.jp/cgi-bin/fordetailkh21.cgi?name=KH.C13.25;source=kh2013
KH.C5.92	RNF123	RNF123; RSPRY1	Cirobu.g00007605	6.60502	0.787503	0.0905745	-0.539525	0.245068	0	https://www.aniseed.cnrs.fr/aniseed/gene/show_expression?unique_id=Cirobu.g00007605	https://www.aniseed.cnrs.fr/aniseed/gene/show_gene?unique_id=Cirobu.g00007605	http://ghost.zool.kyoto-u.ac.jp/cgi-bin/fordetailkh21.cgi?name=KH.C5.92;source=kh2013
KH.L17.3	BNC2	BNC1; BNC2; SALL3	Cirobu.g00011737	2.71867	0.787152	0.122045	-0.157436	0.771815	9	https://www.aniseed.cnrs.fr/aniseed/gene/show_expression?unique_id=Cirobu.g00011737	https://www.aniseed.cnrs.fr/aniseed/gene/show_gene?unique_id=Cirobu.g00011737	http://ghost.zool.kyoto-u.ac.jp/cgi-bin/fordetailkh21.cgi?name=KH.L17.3;source=kh2013
KH.L78.3	KH2013:KH.L78.3	KH.L78.3	Cirobu.g00013087	0.825048	0.787061	0.28947	0.225005	0.789369	0	https://www.aniseed.cnrs.fr/aniseed/gene/show_expression?unique_id=Cirobu.g00013087	https://www.aniseed.cnrs.fr/aniseed/gene/show_gene?unique_id=Cirobu.g00013087	http://ghost.zool.kyoto-u.ac.jp/cgi-bin/fordetailkh21.cgi?name=KH.L78.3;source=kh2013
KH.S1062.4	KH2013:KH.S1062.4	KH.S1062.4	Cirobu.g00013554	0.99593	0.785437	0.462073	0.00291929	1	0	https://www.aniseed.cnrs.fr/aniseed/gene/show_expression?unique_id=Cirobu.g00013554	https://www.aniseed.cnrs.fr/aniseed/gene/show_gene?unique_id=Cirobu.g00013554	http://ghost.zool.kyoto-u.ac.jp/cgi-bin/fordetailkh21.cgi?name=KH.S1062.4;source=kh2013
KH.C4.732	ORC5	CDC6; ORC5	Cirobu.g00006851	1.63241	0.785327	0.351792	0.232605	0.794785	4	https://www.aniseed.cnrs.fr/aniseed/gene/show_expression?unique_id=Cirobu.g00006851	https://www.aniseed.cnrs.fr/aniseed/gene/show_gene?unique_id=Cirobu.g00006851	http://ghost.zool.kyoto-u.ac.jp/cgi-bin/fordetailkh21.cgi?name=KH.C4.732;source=kh2013
KH.C1.1020	KH2013:KH.C1.1020_MOXD1	DBH; MOXD1	Cirobu.g00000026	3.21307	0.784943	0.0897307	0.0326291	0.958902	4	https://www.aniseed.cnrs.fr/aniseed/gene/show_expression?unique_id=Cirobu.g00000026	https://www.aniseed.cnrs.fr/aniseed/gene/show_gene?unique_id=Cirobu.g00000026	http://ghost.zool.kyoto-u.ac.jp/cgi-bin/fordetailkh21.cgi?name=KH.C1.1020;source=kh2013
KH.C1.883	KIFAP3	KIFAP3	Cirobu.g00001166	6.08872	0.784512	0.0958397	-0.262798	0.574341	2	https://www.aniseed.cnrs.fr/aniseed/gene/show_expression?unique_id=Cirobu.g00001166	https://www.aniseed.cnrs.fr/aniseed/gene/show_gene?unique_id=Cirobu.g00001166	http://ghost.zool.kyoto-u.ac.jp/cgi-bin/fordetailkh21.cgi?name=KH.C1.883;source=kh2013
KH.C1.941	HMBOX1	HMBOX1; HNF1A; HNF1B	Cirobu.g00001230	3.10763	0.782845	0.408225	-2.28957	0.0210205	0	https://www.aniseed.cnrs.fr/aniseed/gene/show_expression?unique_id=Cirobu.g00001230	https://www.aniseed.cnrs.fr/aniseed/gene/show_gene?unique_id=Cirobu.g00001230	http://ghost.zool.kyoto-u.ac.jp/cgi-bin/fordetailkh21.cgi?name=KH.C1.941;source=kh2013
KH.C5.197	S1PR1/4	S1PR1; S1PR2; S1PR3	Cirobu.g00007062	3.68584	0.781811	0.163435	0.655558	0.244951	0	https://www.aniseed.cnrs.fr/aniseed/gene/show_expression?unique_id=Cirobu.g00007062	https://www.aniseed.cnrs.fr/aniseed/gene/show_gene?unique_id=Cirobu.g00007062	http://ghost.zool.kyoto-u.ac.jp/cgi-bin/fordetailkh21.cgi?name=KH.C5.197;source=kh2013
KH.C10.505	TEN1	KH.C10.505	Cirobu.g00001731	0.955544	0.78157	0.259284	-0.574918	0.456937	0	https://www.aniseed.cnrs.fr/aniseed/gene/show_expression?unique_id=Cirobu.g00001731	https://www.aniseed.cnrs.fr/aniseed/gene/show_gene?unique_id=Cirobu.g00001731	http://ghost.zool.kyoto-u.ac.jp/cgi-bin/fordetailkh21.cgi?name=KH.C10.505;source=kh2013
KH.S999.5	KH2013:KH.S999.5	KH.S999.5	Cirobu.g00015284	1.07367	0.779757	0.302679	0.841283	0.266269	0	https://www.aniseed.cnrs.fr/aniseed/gene/show_expression?unique_id=Cirobu.g00015284	https://www.aniseed.cnrs.fr/aniseed/gene/show_gene?unique_id=Cirobu.g00015284	http://ghost.zool.kyoto-u.ac.jp/cgi-bin/fordetailkh21.cgi?name=KH.S999.5;source=kh2013
KH.C2.124	LCLAT1	AGPAT3; AGPAT4; LCLAT1	Cirobu.g00004294	4.76081	0.778909	0.0204049	-0.461862	0.174293	4	https://www.aniseed.cnrs.fr/aniseed/gene/show_expression?unique_id=Cirobu.g00004294	https://www.aniseed.cnrs.fr/aniseed/gene/show_gene?unique_id=Cirobu.g00004294	http://ghost.zool.kyoto-u.ac.jp/cgi-bin/fordetailkh21.cgi?name=KH.C2.124;source=kh2013
KH.L147.41	TXK	BTK; ITK; NCK2	Cirobu.g00011322	2.81357	0.778878	0.142152	0.209866	0.695988	9	https://www.aniseed.cnrs.fr/aniseed/gene/show_expression?unique_id=Cirobu.g00011322	https://www.aniseed.cnrs.fr/aniseed/gene/show_gene?unique_id=Cirobu.g00011322	http://ghost.zool.kyoto-u.ac.jp/cgi-bin/fordetailkh21.cgi?name=KH.L147.41;source=kh2013
KH.L18.121	KH2013:KH.L18.121	KH.L18.121	Cirobu.g00011927	-0.18677	0.778834	0.435197	-1.55731	0.136627	0	https://www.aniseed.cnrs.fr/aniseed/gene/show_expression?unique_id=Cirobu.g00011927	https://www.aniseed.cnrs.fr/aniseed/gene/show_gene?unique_id=Cirobu.g00011927	http://ghost.zool.kyoto-u.ac.jp/cgi-bin/fordetailkh21.cgi?name=KH.L18.121;source=kh2013
KH.L71.16	KH2013:KH.L71.16	KH.L71.16	Cirobu.g00013014	1.20983	0.777444	0.37955	-0.261857	0.760838	0	https://www.aniseed.cnrs.fr/aniseed/gene/show_expression?unique_id=Cirobu.g00013014	https://www.aniseed.cnrs.fr/aniseed/gene/show_gene?unique_id=Cirobu.g00013014	http://ghost.zool.kyoto-u.ac.jp/cgi-bin/fordetailkh21.cgi?name=KH.L71.16;source=kh2013
KH.L128.10	KH2013:KH.L128.10	CLEC3A; COLEC10; NCAN	Cirobu.g00010955	2.82516	0.776114	0.172656	0.119703	0.839672	0	https://www.aniseed.cnrs.fr/aniseed/gene/show_expression?unique_id=Cirobu.g00010955	https://www.aniseed.cnrs.fr/aniseed/gene/show_gene?unique_id=Cirobu.g00010955	http://ghost.zool.kyoto-u.ac.jp/cgi-bin/fordetailkh21.cgi?name=KH.L128.10;source=kh2013
KH.C5.447	SNF4	PRKAG1; PRKAG2; PRKAG3	Cirobu.g00007332	4.08082	0.77596	0.10881	-0.563141	0.247932	4	https://www.aniseed.cnrs.fr/aniseed/gene/show_expression?unique_id=Cirobu.g00007332	https://www.aniseed.cnrs.fr/aniseed/gene/show_gene?unique_id=Cirobu.g00007332	http://ghost.zool.kyoto-u.ac.jp/cgi-bin/fordetailkh21.cgi?name=KH.C5.447;source=kh2013
KH.C4.361	GLIPR1	GLIPR1; GLIPR1L1; PI16	Cirobu.g00006446	1.34634	0.775573	0.765685	0.159867	0.957713	0	https://www.aniseed.cnrs.fr/aniseed/gene/show_expression?unique_id=Cirobu.g00006446	https://www.aniseed.cnrs.fr/aniseed/gene/show_gene?unique_id=Cirobu.g00006446	http://ghost.zool.kyoto-u.ac.jp/cgi-bin/fordetailkh21.cgi?name=KH.C4.361;source=kh2013
KH.C2.642	KH2013:KH.C2.642	KH.C2.642	Cirobu.g00004862	2.64354	0.775248	0.159747	0.011521	1	4	https://www.aniseed.cnrs.fr/aniseed/gene/show_expression?unique_id=Cirobu.g00004862	https://www.aniseed.cnrs.fr/aniseed/gene/show_gene?unique_id=Cirobu.g00004862	http://ghost.zool.kyoto-u.ac.jp/cgi-bin/fordetailkh21.cgi?name=KH.C2.642;source=kh2013
KH.L71.4	RNASEL	ERN1; ERN2; MELK	Cirobu.g00013031	5.55183	0.774928	0.0238111	-0.1379	0.693826	0	https://www.aniseed.cnrs.fr/aniseed/gene/show_expression?unique_id=Cirobu.g00013031	https://www.aniseed.cnrs.fr/aniseed/gene/show_gene?unique_id=Cirobu.g00013031	http://ghost.zool.kyoto-u.ac.jp/cgi-bin/fordetailkh21.cgi?name=KH.L71.4;source=kh2013
KH.C9.362	RAC1/2/3	RAC1; RAC2; RAC3	Cirobu.g00009900	7.60861	0.774846	0.0222647	0.132164	0.69599	8	https://www.aniseed.cnrs.fr/aniseed/gene/show_expression?unique_id=Cirobu.g00009900	https://www.aniseed.cnrs.fr/aniseed/gene/show_gene?unique_id=Cirobu.g00009900	http://ghost.zool.kyoto-u.ac.jp/cgi-bin/fordetailkh21.cgi?name=KH.C9.362;source=kh2013
KH.C1.454	STARD3	STAR; STARD3; STARD3NL	Cirobu.g00000696	5.2077	0.774341	0.0576404	-0.294012	0.473293	0	https://www.aniseed.cnrs.fr/aniseed/gene/show_expression?unique_id=Cirobu.g00000696	https://www.aniseed.cnrs.fr/aniseed/gene/show_gene?unique_id=Cirobu.g00000696	http://ghost.zool.kyoto-u.ac.jp/cgi-bin/fordetailkh21.cgi?name=KH.C1.454;source=kh2013
KH.L135.5	TRX	VRTN	Cirobu.g00011108	0.308804	0.774078	0.386277	-0.773761	0.409127	0	https://www.aniseed.cnrs.fr/aniseed/gene/show_expression?unique_id=Cirobu.g00011108	https://www.aniseed.cnrs.fr/aniseed/gene/show_gene?unique_id=Cirobu.g00011108	http://ghost.zool.kyoto-u.ac.jp/cgi-bin/fordetailkh21.cgi?name=KH.L135.5;source=kh2013
KH.S534.4	HPCAL1	HPCA; HPCAL1; VSNL1	Cirobu.g00014645	3.87799	0.773132	0.130792	-0.14617	0.774536	5	https://www.aniseed.cnrs.fr/aniseed/gene/show_expression?unique_id=Cirobu.g00014645	https://www.aniseed.cnrs.fr/aniseed/gene/show_gene?unique_id=Cirobu.g00014645	http://ghost.zool.kyoto-u.ac.jp/cgi-bin/fordetailkh21.cgi?name=KH.S534.4;source=kh2013
KH.C4.519	KH2013:KH.C4.519_ATP6V0A1	ATP6V0A1; ATP6V0A2; ATP6V0A4	Cirobu.g00006617	6.09686	0.770933	0.0821412	-0.364006	0.409891	0	https://www.aniseed.cnrs.fr/aniseed/gene/show_expression?unique_id=Cirobu.g00006617	https://www.aniseed.cnrs.fr/aniseed/gene/show_gene?unique_id=Cirobu.g00006617	http://ghost.zool.kyoto-u.ac.jp/cgi-bin/fordetailkh21.cgi?name=KH.C4.519;source=kh2013
KH.S437.2	TCF25	TCF25	Cirobu.g00014527	2.14923	0.770293	0.272865	0.757709	0.281956	0	https://www.aniseed.cnrs.fr/aniseed/gene/show_expression?unique_id=Cirobu.g00014527	https://www.aniseed.cnrs.fr/aniseed/gene/show_gene?unique_id=Cirobu.g00014527	http://ghost.zool.kyoto-u.ac.jp/cgi-bin/fordetailkh21.cgi?name=KH.S437.2;source=kh2013
KH.C9.721	KH2013:KH.C9.721_CLEC-54/55/56/57	BMP1; CSMD1; TLL2	Cirobu.g00010296	3.64081	0.77023	0.0782291	0.0706009	0.872665	0	https://www.aniseed.cnrs.fr/aniseed/gene/show_expression?unique_id=Cirobu.g00010296	https://www.aniseed.cnrs.fr/aniseed/gene/show_gene?unique_id=Cirobu.g00010296	http://ghost.zool.kyoto-u.ac.jp/cgi-bin/fordetailkh21.cgi?name=KH.C9.721;source=kh2013
KH.C13.85	KH2013:KH.C13.85_YPL279C	KH.C13.85	Cirobu.g00003489	3.85797	0.770147	0.145773	-0.0103807	0.982698	0	https://www.aniseed.cnrs.fr/aniseed/gene/show_expression?unique_id=Cirobu.g00003489	https://www.aniseed.cnrs.fr/aniseed/gene/show_gene?unique_id=Cirobu.g00003489	http://ghost.zool.kyoto-u.ac.jp/cgi-bin/fordetailkh21.cgi?name=KH.C13.85;source=kh2013
KH.C11.200	ZFAND1	ZFAND1; ZFAND2A; ZFAND2B	Cirobu.g00002015	2.65069	0.768751	0.168626	0.271364	0.635279	10	https://www.aniseed.cnrs.fr/aniseed/gene/show_expression?unique_id=Cirobu.g00002015	https://www.aniseed.cnrs.fr/aniseed/gene/show_gene?unique_id=Cirobu.g00002015	http://ghost.zool.kyoto-u.ac.jp/cgi-bin/fordetailkh21.cgi?name=KH.C11.200;source=kh2013
KH.C5.219	KH2013:KH.C5.219	KH.C5.219	Cirobu.g00007087	4.00686	0.767905	0.0571948	0.0833362	0.840718	0	https://www.aniseed.cnrs.fr/aniseed/gene/show_expression?unique_id=Cirobu.g00007087	https://www.aniseed.cnrs.fr/aniseed/gene/show_gene?unique_id=Cirobu.g00007087	http://ghost.zool.kyoto-u.ac.jp/cgi-bin/fordetailkh21.cgi?name=KH.C5.219;source=kh2013
KH.C4.573	ABCC1/6	ABCC11; ABCC12; ABCC5	Cirobu.g00006675	2.41385	0.767732	0.187046	0.527713	0.378674	0	https://www.aniseed.cnrs.fr/aniseed/gene/show_expression?unique_id=Cirobu.g00006675	https://www.aniseed.cnrs.fr/aniseed/gene/show_gene?unique_id=Cirobu.g00006675	http://ghost.zool.kyoto-u.ac.jp/cgi-bin/fordetailkh21.cgi?name=KH.C4.573;source=kh2013
KH.L5.7	D16H22S680E	TANGO2	Cirobu.g00012722	0.340631	0.767203	0.480431	-0.383923	0.730607	0	https://www.aniseed.cnrs.fr/aniseed/gene/show_expression?unique_id=Cirobu.g00012722	https://www.aniseed.cnrs.fr/aniseed/gene/show_gene?unique_id=Cirobu.g00012722	http://ghost.zool.kyoto-u.ac.jp/cgi-bin/fordetailkh21.cgi?name=KH.L5.7;source=kh2013
KH.C2.429	KH2013:KH.C2.429_SCRIB	ERBIN; LRRIQ4; SCRIB	Cirobu.g00004626	2.63626	0.766676	0.217103	-0.553792	0.389822	0	https://www.aniseed.cnrs.fr/aniseed/gene/show_expression?unique_id=Cirobu.g00004626	https://www.aniseed.cnrs.fr/aniseed/gene/show_gene?unique_id=Cirobu.g00004626	http://ghost.zool.kyoto-u.ac.jp/cgi-bin/fordetailkh21.cgi?name=KH.C2.429;source=kh2013
KH.L107.7	LHX1/5	LHX1; LHX5	Cirobu.g00010599	4.08637	0.766434	0.294779	-0.892562	0.222311	12	https://www.aniseed.cnrs.fr/aniseed/gene/show_expression?unique_id=Cirobu.g00010599	https://www.aniseed.cnrs.fr/aniseed/gene/show_gene?unique_id=Cirobu.g00010599	http://ghost.zool.kyoto-u.ac.jp/cgi-bin/fordetailkh21.cgi?name=KH.L107.7;source=kh2013
KH.L41.53	KH2013:KH.L41.53	KH.L41.53	Cirobu.g00012607	5.48462	0.766153	0.0471739	0.422176	0.275686	0	https://www.aniseed.cnrs.fr/aniseed/gene/show_expression?unique_id=Cirobu.g00012607	https://www.aniseed.cnrs.fr/aniseed/gene/show_gene?unique_id=Cirobu.g00012607	http://ghost.zool.kyoto-u.ac.jp/cgi-bin/fordetailkh21.cgi?name=KH.L41.53;source=kh2013
KH.L170.14	KH2013:KH.L170.14_SLC35G1	SLC35G1; SLC35G2	Cirobu.g00011749	5.80661	0.765762	0.127865	-0.685231	0.175969	6	https://www.aniseed.cnrs.fr/aniseed/gene/show_expression?unique_id=Cirobu.g00011749	https://www.aniseed.cnrs.fr/aniseed/gene/show_gene?unique_id=Cirobu.g00011749	http://ghost.zool.kyoto-u.ac.jp/cgi-bin/fordetailkh21.cgi?name=KH.L170.14;source=kh2013
KH.C5.529	KH2013:KH.C5.529	KH.C5.529	Cirobu.g00007423	0.440503	0.764678	0.419017	0.0824811	0.961816	0	https://www.aniseed.cnrs.fr/aniseed/gene/show_expression?unique_id=Cirobu.g00007423	https://www.aniseed.cnrs.fr/aniseed/gene/show_gene?unique_id=Cirobu.g00007423	http://ghost.zool.kyoto-u.ac.jp/cgi-bin/fordetailkh21.cgi?name=KH.C5.529;source=kh2013
KH.C2.518	DNAJB2/3/6/7/8	DNAJB2; DNAJB6; DNAJB8	Cirobu.g00004724	4.68124	0.764505	0.104723	-0.412143	0.383841	0	https://www.aniseed.cnrs.fr/aniseed/gene/show_expression?unique_id=Cirobu.g00004724	https://www.aniseed.cnrs.fr/aniseed/gene/show_gene?unique_id=Cirobu.g00004724	http://ghost.zool.kyoto-u.ac.jp/cgi-bin/fordetailkh21.cgi?name=KH.C2.518;source=kh2013
KH.S391.4	RNF185	RNF185; RNF5	Cirobu.g00014413	4.90486	0.763652	0.0865429	0.149912	0.738022	9	https://www.aniseed.cnrs.fr/aniseed/gene/show_expression?unique_id=Cirobu.g00014413	https://www.aniseed.cnrs.fr/aniseed/gene/show_gene?unique_id=Cirobu.g00014413	http://ghost.zool.kyoto-u.ac.jp/cgi-bin/fordetailkh21.cgi?name=KH.S391.4;source=kh2013
KH.C3.856	KH2013:KH.C3.856_ABCC12/5	ABCC11; ABCC12; ABCC5	Cirobu.g00006067	4.45021	0.763082	0.143206	-0.689791	0.185597	0	https://www.aniseed.cnrs.fr/aniseed/gene/show_expression?unique_id=Cirobu.g00006067	https://www.aniseed.cnrs.fr/aniseed/gene/show_gene?unique_id=Cirobu.g00006067	http://ghost.zool.kyoto-u.ac.jp/cgi-bin/fordetailkh21.cgi?name=KH.C3.856;source=kh2013
KH.C4.710	KH2013:KH.C4.710	KH.C4.710	Cirobu.g00006827	1.75485	0.762716	0.415999	0.529195	0.591136	0	https://www.aniseed.cnrs.fr/aniseed/gene/show_expression?unique_id=Cirobu.g00006827	https://www.aniseed.cnrs.fr/aniseed/gene/show_gene?unique_id=Cirobu.g00006827	http://ghost.zool.kyoto-u.ac.jp/cgi-bin/fordetailkh21.cgi?name=KH.C4.710;source=kh2013
KH.L65.11	CG31883	KH.L65.11	Cirobu.g00012917	7.29918	0.762384	0.058755	0.360918	0.369919	4	https://www.aniseed.cnrs.fr/aniseed/gene/show_expression?unique_id=Cirobu.g00012917	https://www.aniseed.cnrs.fr/aniseed/gene/show_gene?unique_id=Cirobu.g00012917	http://ghost.zool.kyoto-u.ac.jp/cgi-bin/fordetailkh21.cgi?name=KH.L65.11;source=kh2013
KH.C11.32	KH2013:KH.C11.32	STUM	Cirobu.g00002143	1.47836	0.762182	0.322381	0.326201	0.682056	0	https://www.aniseed.cnrs.fr/aniseed/gene/show_expression?unique_id=Cirobu.g00002143	https://www.aniseed.cnrs.fr/aniseed/gene/show_gene?unique_id=Cirobu.g00002143	http://ghost.zool.kyoto-u.ac.jp/cgi-bin/fordetailkh21.cgi?name=KH.C11.32;source=kh2013
KH.C5.34	RX1/2/3	ALX3; ALX4; UNCX	Cirobu.g00007214	1.26666	0.762044	0.450163	-1.0846	0.297891	15	https://www.aniseed.cnrs.fr/aniseed/gene/show_expression?unique_id=Cirobu.g00007214	https://www.aniseed.cnrs.fr/aniseed/gene/show_gene?unique_id=Cirobu.g00007214	http://ghost.zool.kyoto-u.ac.jp/cgi-bin/fordetailkh21.cgi?name=KH.C5.34;source=kh2013
KH.S396.6	TRAF6	TRAF3; TRAF5; TRAF6	Cirobu.g00014422	3.99597	0.761895	0.0849268	-0.710965	0.113639	10	https://www.aniseed.cnrs.fr/aniseed/gene/show_expression?unique_id=Cirobu.g00014422	https://www.aniseed.cnrs.fr/aniseed/gene/show_gene?unique_id=Cirobu.g00014422	http://ghost.zool.kyoto-u.ac.jp/cgi-bin/fordetailkh21.cgi?name=KH.S396.6;source=kh2013
KH.L20.30	EPG5	EPG5; SPRR3	Cirobu.g00012083	3.45273	0.761599	0.139144	-0.550314	0.291019	0	https://www.aniseed.cnrs.fr/aniseed/gene/show_expression?unique_id=Cirobu.g00012083	https://www.aniseed.cnrs.fr/aniseed/gene/show_gene?unique_id=Cirobu.g00012083	http://ghost.zool.kyoto-u.ac.jp/cgi-bin/fordetailkh21.cgi?name=KH.L20.30;source=kh2013
KH.C1.470	C9ORF116	C15orf65; C9orf116	Cirobu.g00000713	1.63868	0.761368	0.38923	0.894799	0.308194	0	https://www.aniseed.cnrs.fr/aniseed/gene/show_expression?unique_id=Cirobu.g00000713	https://www.aniseed.cnrs.fr/aniseed/gene/show_gene?unique_id=Cirobu.g00000713	http://ghost.zool.kyoto-u.ac.jp/cgi-bin/fordetailkh21.cgi?name=KH.C1.470;source=kh2013
KH.L151.6	FUK	FUK	Cirobu.g00011384	4.2917	0.760398	0.0376418	-0.0448242	0.908203	0	https://www.aniseed.cnrs.fr/aniseed/gene/show_expression?unique_id=Cirobu.g00011384	https://www.aniseed.cnrs.fr/aniseed/gene/show_gene?unique_id=Cirobu.g00011384	http://ghost.zool.kyoto-u.ac.jp/cgi-bin/fordetailkh21.cgi?name=KH.L151.6;source=kh2013
KH.C14.473	KH2013:KH.C14.473_FET3	KH.C14.473	Cirobu.g00003911	0.624156	0.759633	0.509187	1.65693	0.144433	0	https://www.aniseed.cnrs.fr/aniseed/gene/show_expression?unique_id=Cirobu.g00003911	https://www.aniseed.cnrs.fr/aniseed/gene/show_gene?unique_id=Cirobu.g00003911	http://ghost.zool.kyoto-u.ac.jp/cgi-bin/fordetailkh21.cgi?name=KH.C14.473;source=kh2013
KH.C8.555	WDR37	FBXW7; WDR37; WDR5	Cirobu.g00009201	5.83162	0.758547	0.0861808	-0.679499	0.124884	0	https://www.aniseed.cnrs.fr/aniseed/gene/show_expression?unique_id=Cirobu.g00009201	https://www.aniseed.cnrs.fr/aniseed/gene/show_gene?unique_id=Cirobu.g00009201	http://ghost.zool.kyoto-u.ac.jp/cgi-bin/fordetailkh21.cgi?name=KH.C8.555;source=kh2013
KH.C2.46	MCTS1/2	EIF2D; MCTS1	Cirobu.g00004659	3.74893	0.758189	0.140287	0.0331647	0.949448	4	https://www.aniseed.cnrs.fr/aniseed/gene/show_expression?unique_id=Cirobu.g00004659	https://www.aniseed.cnrs.fr/aniseed/gene/show_gene?unique_id=Cirobu.g00004659	http://ghost.zool.kyoto-u.ac.jp/cgi-bin/fordetailkh21.cgi?name=KH.C2.46;source=kh2013
KH.C5.183	PTPRD	PTPRD; PTPRF	Cirobu.g00007047	7.1286	0.757951	0.0255732	-0.0977037	0.77336	3	https://www.aniseed.cnrs.fr/aniseed/gene/show_expression?unique_id=Cirobu.g00007047	https://www.aniseed.cnrs.fr/aniseed/gene/show_gene?unique_id=Cirobu.g00007047	http://ghost.zool.kyoto-u.ac.jp/cgi-bin/fordetailkh21.cgi?name=KH.C5.183;source=kh2013
KH.C9.833	LETMD1	LETM1; LETMD1	Cirobu.g00010419	3.59203	0.757472	0.107171	0.155885	0.746581	0	https://www.aniseed.cnrs.fr/aniseed/gene/show_expression?unique_id=Cirobu.g00010419	https://www.aniseed.cnrs.fr/aniseed/gene/show_gene?unique_id=Cirobu.g00010419	http://ghost.zool.kyoto-u.ac.jp/cgi-bin/fordetailkh21.cgi?name=KH.C9.833;source=kh2013
KH.C11.719	KH2013:KH.C11.719	KH.C11.719	Cirobu.g00002575	2.03895	0.757217	0.357744	0.600609	0.474316	0	https://www.aniseed.cnrs.fr/aniseed/gene/show_expression?unique_id=Cirobu.g00002575	https://www.aniseed.cnrs.fr/aniseed/gene/show_gene?unique_id=Cirobu.g00002575	http://ghost.zool.kyoto-u.ac.jp/cgi-bin/fordetailkh21.cgi?name=KH.C11.719;source=kh2013
KH.L152.21	KH2013:KH.L152.21_MOODY	ADRB1; ADRB2; GPR50	Cirobu.g00011398	1.71915	0.756369	0.26703	0.254617	0.716659	0	https://www.aniseed.cnrs.fr/aniseed/gene/show_expression?unique_id=Cirobu.g00011398	https://www.aniseed.cnrs.fr/aniseed/gene/show_gene?unique_id=Cirobu.g00011398	http://ghost.zool.kyoto-u.ac.jp/cgi-bin/fordetailkh21.cgi?name=KH.L152.21;source=kh2013
KH.C2.231	RFC1	ATAD5; CHTF18; RFC1	Cirobu.g00004410	3.72012	0.7563	0.132065	0.114427	0.825104	0	https://www.aniseed.cnrs.fr/aniseed/gene/show_expression?unique_id=Cirobu.g00004410	https://www.aniseed.cnrs.fr/aniseed/gene/show_gene?unique_id=Cirobu.g00004410	http://ghost.zool.kyoto-u.ac.jp/cgi-bin/fordetailkh21.cgi?name=KH.C2.231;source=kh2013
KH.C4.344	KH2013:KH.C4.344	KH.C4.344	Cirobu.g00006428	1.28114	0.756074	0.366518	0.382726	0.667007	0	https://www.aniseed.cnrs.fr/aniseed/gene/show_expression?unique_id=Cirobu.g00006428	https://www.aniseed.cnrs.fr/aniseed/gene/show_gene?unique_id=Cirobu.g00006428	http://ghost.zool.kyoto-u.ac.jp/cgi-bin/fordetailkh21.cgi?name=KH.C4.344;source=kh2013
KH.C12.488	TTLL2	TTLL1; TTLL2; TTLL5	Cirobu.g00003046	3.90072	0.755041	0.126277	0.477137	0.333073	0	https://www.aniseed.cnrs.fr/aniseed/gene/show_expression?unique_id=Cirobu.g00003046	https://www.aniseed.cnrs.fr/aniseed/gene/show_gene?unique_id=Cirobu.g00003046	http://ghost.zool.kyoto-u.ac.jp/cgi-bin/fordetailkh21.cgi?name=KH.C12.488;source=kh2013
KH.C1.49	Y55D5A.3	ASAH1; NAAA	Cirobu.g00000733	1.77637	0.754307	0.399104	-0.784151	0.386398	0	https://www.aniseed.cnrs.fr/aniseed/gene/show_expression?unique_id=Cirobu.g00000733	https://www.aniseed.cnrs.fr/aniseed/gene/show_gene?unique_id=Cirobu.g00000733	http://ghost.zool.kyoto-u.ac.jp/cgi-bin/fordetailkh21.cgi?name=KH.C1.49;source=kh2013
KH.C3.423	FAM200A	ZBED5; ZBED9; ZMYM6	Cirobu.g00005602	3.10001	0.754175	0.135775	-0.0350104	0.96944	0	https://www.aniseed.cnrs.fr/aniseed/gene/show_expression?unique_id=Cirobu.g00005602	https://www.aniseed.cnrs.fr/aniseed/gene/show_gene?unique_id=Cirobu.g00005602	http://ghost.zool.kyoto-u.ac.jp/cgi-bin/fordetailkh21.cgi?name=KH.C3.423;source=kh2013
KH.C11.98	GAL3ST1/2/3	GAL3ST1; GAL3ST2; GAL3ST3	Cirobu.g00002620	5.2163	0.753993	0.0898971	0.0643152	0.891257	0	https://www.aniseed.cnrs.fr/aniseed/gene/show_expression?unique_id=Cirobu.g00002620	https://www.aniseed.cnrs.fr/aniseed/gene/show_gene?unique_id=Cirobu.g00002620	http://ghost.zool.kyoto-u.ac.jp/cgi-bin/fordetailkh21.cgi?name=KH.C11.98;source=kh2013
KH.C2.409	KH2013:KH.C2.409_MUP1/3	SLC7A11; SLC7A6; SLC7A8	Cirobu.g00004604	1.00787	0.753935	0.459475	1.06313	0.297782	0	https://www.aniseed.cnrs.fr/aniseed/gene/show_expression?unique_id=Cirobu.g00004604	https://www.aniseed.cnrs.fr/aniseed/gene/show_gene?unique_id=Cirobu.g00004604	http://ghost.zool.kyoto-u.ac.jp/cgi-bin/fordetailkh21.cgi?name=KH.C2.409;source=kh2013
KH.C14.325	KH2013:KH.C14.325_SRR	SDS; SDSL; SRR	Cirobu.g00003752	2.89896	0.751478	0.182654	0.520461	0.358442	0	https://www.aniseed.cnrs.fr/aniseed/gene/show_expression?unique_id=Cirobu.g00003752	https://www.aniseed.cnrs.fr/aniseed/gene/show_gene?unique_id=Cirobu.g00003752	http://ghost.zool.kyoto-u.ac.jp/cgi-bin/fordetailkh21.cgi?name=KH.C14.325;source=kh2013
KH.C9.370	KH2013:KH.C9.370_RIPK1/2/3	ABL2; RIPK1; RIPK3	Cirobu.g00009909	2.04615	0.750995	0.306989	-0.52805	0.481238	0	https://www.aniseed.cnrs.fr/aniseed/gene/show_expression?unique_id=Cirobu.g00009909	https://www.aniseed.cnrs.fr/aniseed/gene/show_gene?unique_id=Cirobu.g00009909	http://ghost.zool.kyoto-u.ac.jp/cgi-bin/fordetailkh21.cgi?name=KH.C9.370;source=kh2013
KH.L13.21	FEZ1/2	FEZ1; FEZ2	Cirobu.g00010990	4.80727	0.750798	0.0904413	-0.498013	0.263521	0	https://www.aniseed.cnrs.fr/aniseed/gene/show_expression?unique_id=Cirobu.g00010990	https://www.aniseed.cnrs.fr/aniseed/gene/show_gene?unique_id=Cirobu.g00010990	http://ghost.zool.kyoto-u.ac.jp/cgi-bin/fordetailkh21.cgi?name=KH.L13.21;source=kh2013
KH.C2.1120	KH2013:KH.C2.1120	FAM47A; FAM47E; FAM47E-STBD1	Cirobu.g00004247	2.62	0.750576	0.200396	0.00695744	1	0	https://www.aniseed.cnrs.fr/aniseed/gene/show_expression?unique_id=Cirobu.g00004247	https://www.aniseed.cnrs.fr/aniseed/gene/show_gene?unique_id=Cirobu.g00004247	http://ghost.zool.kyoto-u.ac.jp/cgi-bin/fordetailkh21.cgi?name=KH.C2.1120;source=kh2013
KH.L22.70	UNC-122	OLFM1; OLFM2; OLFM3	Cirobu.g00012188	7.15148	0.750198	0.165707	0.869178	0.109	0	https://www.aniseed.cnrs.fr/aniseed/gene/show_expression?unique_id=Cirobu.g00012188	https://www.aniseed.cnrs.fr/aniseed/gene/show_gene?unique_id=Cirobu.g00012188	http://ghost.zool.kyoto-u.ac.jp/cgi-bin/fordetailkh21.cgi?name=KH.L22.70;source=kh2013
KH.C4.744	MED23	MED23	Cirobu.g00006864	4.02059	0.750024	0.133244	-0.514041	0.298829	0	https://www.aniseed.cnrs.fr/aniseed/gene/show_expression?unique_id=Cirobu.g00006864	https://www.aniseed.cnrs.fr/aniseed/gene/show_gene?unique_id=Cirobu.g00006864	http://ghost.zool.kyoto-u.ac.jp/cgi-bin/fordetailkh21.cgi?name=KH.C4.744;source=kh2013
KH.C8.576	KH2013:KH.C8.576_TECTA	FN1; FNDC3B; TECTA	Cirobu.g00009222	2.48294	0.749416	0.289227	-0.193681	0.794592	0	https://www.aniseed.cnrs.fr/aniseed/gene/show_expression?unique_id=Cirobu.g00009222	https://www.aniseed.cnrs.fr/aniseed/gene/show_gene?unique_id=Cirobu.g00009222	http://ghost.zool.kyoto-u.ac.jp/cgi-bin/fordetailkh21.cgi?name=KH.C8.576;source=kh2013
KH.C4.407	KH2013:KH.C4.407_KIF1B	KIF1A; KIF1B; KIF1C	Cirobu.g00006495	7.37374	0.748992	0.100855	-0.810267	0.0769853	2	https://www.aniseed.cnrs.fr/aniseed/gene/show_expression?unique_id=Cirobu.g00006495	https://www.aniseed.cnrs.fr/aniseed/gene/show_gene?unique_id=Cirobu.g00006495	http://ghost.zool.kyoto-u.ac.jp/cgi-bin/fordetailkh21.cgi?name=KH.C4.407;source=kh2013
KH.C1.1143	F1NE60_CHICK	KH.C1.1143	Cirobu.g00000161	2.34766	0.748402	0.294763	0.0204125	1	0	https://www.aniseed.cnrs.fr/aniseed/gene/show_expression?unique_id=Cirobu.g00000161	https://www.aniseed.cnrs.fr/aniseed/gene/show_gene?unique_id=Cirobu.g00000161	http://ghost.zool.kyoto-u.ac.jp/cgi-bin/fordetailkh21.cgi?name=KH.C1.1143;source=kh2013
KH.L63.18	KH2013:KH.L63.18_F31D5.4/5	ADGRD1; ADGRG6; ADGRG7	Cirobu.g00012895	3.7328	0.748199	0.25114	-0.638972	0.324341	0	https://www.aniseed.cnrs.fr/aniseed/gene/show_expression?unique_id=Cirobu.g00012895	https://www.aniseed.cnrs.fr/aniseed/gene/show_gene?unique_id=Cirobu.g00012895	http://ghost.zool.kyoto-u.ac.jp/cgi-bin/fordetailkh21.cgi?name=KH.L63.18;source=kh2013
KH.C11.154	KH2013:KH.C11.154_CHMP1A	CHMP1A; CHMP1B; CHMP2B	Cirobu.g00001964	4.29886	0.748134	0.0736111	-0.0637773	0.88795	0	https://www.aniseed.cnrs.fr/aniseed/gene/show_expression?unique_id=Cirobu.g00001964	https://www.aniseed.cnrs.fr/aniseed/gene/show_gene?unique_id=Cirobu.g00001964	http://ghost.zool.kyoto-u.ac.jp/cgi-bin/fordetailkh21.cgi?name=KH.C11.154;source=kh2013
KH.L9.10	ATP6V1C1/2	ATP6V1C1; ATP6V1C2	Cirobu.g00013236	6.45983	0.74753	0.0240563	0.0711698	0.83102	4	https://www.aniseed.cnrs.fr/aniseed/gene/show_expression?unique_id=Cirobu.g00013236	https://www.aniseed.cnrs.fr/aniseed/gene/show_gene?unique_id=Cirobu.g00013236	http://ghost.zool.kyoto-u.ac.jp/cgi-bin/fordetailkh21.cgi?name=KH.L9.10;source=kh2013
KH.C12.587	GDI/1/2	CHML; GDI1; GDI2	Cirobu.g00003156	8.65771	0.747388	0.0454924	-0.211161	0.570331	5	https://www.aniseed.cnrs.fr/aniseed/gene/show_expression?unique_id=Cirobu.g00003156	https://www.aniseed.cnrs.fr/aniseed/gene/show_gene?unique_id=Cirobu.g00003156	http://ghost.zool.kyoto-u.ac.jp/cgi-bin/fordetailkh21.cgi?name=KH.C12.587;source=kh2013
KH.L76.13	EPM2AIP1	GTF2IRD2; GTF2IRD2B; ZBED9	Cirobu.g00013071	1.10193	0.747195	0.555009	-0.0198547	0.982579	0	https://www.aniseed.cnrs.fr/aniseed/gene/show_expression?unique_id=Cirobu.g00013071	https://www.aniseed.cnrs.fr/aniseed/gene/show_gene?unique_id=Cirobu.g00013071	http://ghost.zool.kyoto-u.ac.jp/cgi-bin/fordetailkh21.cgi?name=KH.L76.13;source=kh2013
KH.C4.338	PAM	DBH; MOXD1; PAM	Cirobu.g00006421	7.73328	0.746246	0.0639976	-0.0704767	0.860731	0	https://www.aniseed.cnrs.fr/aniseed/gene/show_expression?unique_id=Cirobu.g00006421	https://www.aniseed.cnrs.fr/aniseed/gene/show_gene?unique_id=Cirobu.g00006421	http://ghost.zool.kyoto-u.ac.jp/cgi-bin/fordetailkh21.cgi?name=KH.C4.338;source=kh2013
KH.C2.569	KH2013:KH.C2.569_NMUR1/2	ADRA1A; GHSR; NTSR1	Cirobu.g00004780	1.24004	0.745967	0.584017	0.357311	0.799848	0	https://www.aniseed.cnrs.fr/aniseed/gene/show_expression?unique_id=Cirobu.g00004780	https://www.aniseed.cnrs.fr/aniseed/gene/show_gene?unique_id=Cirobu.g00004780	http://ghost.zool.kyoto-u.ac.jp/cgi-bin/fordetailkh21.cgi?name=KH.C2.569;source=kh2013
KH.C1.206	ECE1/2	ECE1; ECE2; MMEL1	Cirobu.g00000422	6.30098	0.745915	0.137045	-0.380255	0.446246	0	https://www.aniseed.cnrs.fr/aniseed/gene/show_expression?unique_id=Cirobu.g00000422	https://www.aniseed.cnrs.fr/aniseed/gene/show_gene?unique_id=Cirobu.g00000422	http://ghost.zool.kyoto-u.ac.jp/cgi-bin/fordetailkh21.cgi?name=KH.C1.206;source=kh2013
KH.C14.320	ADCY5/6	ADCY4; ADCY5; ADCY6	Cirobu.g00003748	5.91819	0.745827	0.0654083	-0.812255	0.0466404	1	https://www.aniseed.cnrs.fr/aniseed/gene/show_expression?unique_id=Cirobu.g00003748	https://www.aniseed.cnrs.fr/aniseed/gene/show_gene?unique_id=Cirobu.g00003748	http://ghost.zool.kyoto-u.ac.jp/cgi-bin/fordetailkh21.cgi?name=KH.C14.320;source=kh2013
KH.C8.221	KIF2A	KIF2A; KIF2B; KIF2C	Cirobu.g00008837	6.19701	0.745641	0.0326404	-0.502949	0.150381	0	https://www.aniseed.cnrs.fr/aniseed/gene/show_expression?unique_id=Cirobu.g00008837	https://www.aniseed.cnrs.fr/aniseed/gene/show_gene?unique_id=Cirobu.g00008837	http://ghost.zool.kyoto-u.ac.jp/cgi-bin/fordetailkh21.cgi?name=KH.C8.221;source=kh2013
KH.C8.169	PDCD2	AC092073.1; PDCD2; PDCD2L	Cirobu.g00008778	1.31265	0.745222	0.309025	0.696253	0.35887	9	https://www.aniseed.cnrs.fr/aniseed/gene/show_expression?unique_id=Cirobu.g00008778	https://www.aniseed.cnrs.fr/aniseed/gene/show_gene?unique_id=Cirobu.g00008778	http://ghost.zool.kyoto-u.ac.jp/cgi-bin/fordetailkh21.cgi?name=KH.C8.169;source=kh2013
KH.C4.421	KH2013:KH.C4.421_MUC5B	MUC5AC; MUC5B; VWF	Cirobu.g00006511	1.52135	0.745203	0.48868	-0.0596805	0.954366	0	https://www.aniseed.cnrs.fr/aniseed/gene/show_expression?unique_id=Cirobu.g00006511	https://www.aniseed.cnrs.fr/aniseed/gene/show_gene?unique_id=Cirobu.g00006511	http://ghost.zool.kyoto-u.ac.jp/cgi-bin/fordetailkh21.cgi?name=KH.C4.421;source=kh2013
KH.C2.418	FUCA/1/2	FUCA1; FUCA2	Cirobu.g00004614	3.91296	0.745092	0.131038	0.473579	0.341147	0	https://www.aniseed.cnrs.fr/aniseed/gene/show_expression?unique_id=Cirobu.g00004614	https://www.aniseed.cnrs.fr/aniseed/gene/show_gene?unique_id=Cirobu.g00004614	http://ghost.zool.kyoto-u.ac.jp/cgi-bin/fordetailkh21.cgi?name=KH.C2.418;source=kh2013
KH.C8.28	KH2013:KH.C8.28_CG13759	KH.C8.28	Cirobu.g00008900	2.99529	0.744793	0.282083	-0.507477	0.457178	0	https://www.aniseed.cnrs.fr/aniseed/gene/show_expression?unique_id=Cirobu.g00008900	https://www.aniseed.cnrs.fr/aniseed/gene/show_gene?unique_id=Cirobu.g00008900	http://ghost.zool.kyoto-u.ac.jp/cgi-bin/fordetailkh21.cgi?name=KH.C8.28;source=kh2013
KH.C5.69	MAPK7	MAPK1; MAPK3; MAPK7	Cirobu.g00007579	2.85643	0.744689	0.181281	-0.613981	0.277496	9	https://www.aniseed.cnrs.fr/aniseed/gene/show_expression?unique_id=Cirobu.g00007579	https://www.aniseed.cnrs.fr/aniseed/gene/show_gene?unique_id=Cirobu.g00007579	http://ghost.zool.kyoto-u.ac.jp/cgi-bin/fordetailkh21.cgi?name=KH.C5.69;source=kh2013
KH.L46.6	HSPA1A	HSPA1A; HSPA1B	Cirobu.g00012690	3.43353	0.744275	0.612926	1.38832	0.353735	7	https://www.aniseed.cnrs.fr/aniseed/gene/show_expression?unique_id=Cirobu.g00012690	https://www.aniseed.cnrs.fr/aniseed/gene/show_gene?unique_id=Cirobu.g00012690	http://ghost.zool.kyoto-u.ac.jp/cgi-bin/fordetailkh21.cgi?name=KH.L46.6;source=kh2013
KH.C10.581	SIK3	SIK1; SIK2; SIK3	Cirobu.g00001813	5.03209	0.743178	0.0641213	-0.614672	0.130402	4	https://www.aniseed.cnrs.fr/aniseed/gene/show_expression?unique_id=Cirobu.g00001813	https://www.aniseed.cnrs.fr/aniseed/gene/show_gene?unique_id=Cirobu.g00001813	http://ghost.zool.kyoto-u.ac.jp/cgi-bin/fordetailkh21.cgi?name=KH.C10.581;source=kh2013
KH.L35.10	KH2013:KH.L35.10	KH.L35.10	Cirobu.g00012350	0.502215	0.742793	0.463706	0.934188	0.361751	2	https://www.aniseed.cnrs.fr/aniseed/gene/show_expression?unique_id=Cirobu.g00012350	https://www.aniseed.cnrs.fr/aniseed/gene/show_gene?unique_id=Cirobu.g00012350	http://ghost.zool.kyoto-u.ac.jp/cgi-bin/fordetailkh21.cgi?name=KH.L35.10;source=kh2013
KH.C4.727	VHA68-1/2	ATP5F1B; ATP6V1A; ATP6V1B2	Cirobu.g00006845	7.13473	0.742347	0.038767	-0.000682346	0.999094	0	https://www.aniseed.cnrs.fr/aniseed/gene/show_expression?unique_id=Cirobu.g00006845	https://www.aniseed.cnrs.fr/aniseed/gene/show_gene?unique_id=Cirobu.g00006845	http://ghost.zool.kyoto-u.ac.jp/cgi-bin/fordetailkh21.cgi?name=KH.C4.727;source=kh2013
KH.C2.900	VAV/2	BLK; PTK6; VAV2	Cirobu.g00005143	1.59249	0.741877	0.247217	0.289563	0.677906	0	https://www.aniseed.cnrs.fr/aniseed/gene/show_expression?unique_id=Cirobu.g00005143	https://www.aniseed.cnrs.fr/aniseed/gene/show_gene?unique_id=Cirobu.g00005143	http://ghost.zool.kyoto-u.ac.jp/cgi-bin/fordetailkh21.cgi?name=KH.C2.900;source=kh2013
KH.S425.10	KH2013:KH.S425.10	SLC35F3; SLC35F4; SLC35F5	Cirobu.g00014493	3.79362	0.741092	0.220556	-0.297302	0.621371	0	https://www.aniseed.cnrs.fr/aniseed/gene/show_expression?unique_id=Cirobu.g00014493	https://www.aniseed.cnrs.fr/aniseed/gene/show_gene?unique_id=Cirobu.g00014493	http://ghost.zool.kyoto-u.ac.jp/cgi-bin/fordetailkh21.cgi?name=KH.S425.10;source=kh2013
KH.C2.1047	DCTN5	DCTN5	Cirobu.g00004165	2.90819	0.740865	0.160396	-0.134406	0.809174	0	https://www.aniseed.cnrs.fr/aniseed/gene/show_expression?unique_id=Cirobu.g00004165	https://www.aniseed.cnrs.fr/aniseed/gene/show_gene?unique_id=Cirobu.g00004165	http://ghost.zool.kyoto-u.ac.jp/cgi-bin/fordetailkh21.cgi?name=KH.C2.1047;source=kh2013
KH.C12.276	KH2013:KH.C12.276_REEP5/6	REEP2; REEP5; REEP6	Cirobu.g00002816	3.82764	0.73964	0.160534	0.620289	0.242679	1	https://www.aniseed.cnrs.fr/aniseed/gene/show_expression?unique_id=Cirobu.g00002816	https://www.aniseed.cnrs.fr/aniseed/gene/show_gene?unique_id=Cirobu.g00002816	http://ghost.zool.kyoto-u.ac.jp/cgi-bin/fordetailkh21.cgi?name=KH.C12.276;source=kh2013
KH.C14.236	KH2013:KH.C14.236_HSDL1	HSD17B12; HSD17B3; HSDL1	Cirobu.g00003655	7.75039	0.739429	0.0349176	-0.13213	0.706247	8	https://www.aniseed.cnrs.fr/aniseed/gene/show_expression?unique_id=Cirobu.g00003655	https://www.aniseed.cnrs.fr/aniseed/gene/show_gene?unique_id=Cirobu.g00003655	http://ghost.zool.kyoto-u.ac.jp/cgi-bin/fordetailkh21.cgi?name=KH.C14.236;source=kh2013
KH.C11.487	KH2013:KH.C11.487_CALM1/2	CALM1; CALM3; CALML3	Cirobu.g00002322	1.66114	0.739417	0.36987	-0.822088	0.334349	0	https://www.aniseed.cnrs.fr/aniseed/gene/show_expression?unique_id=Cirobu.g00002322	https://www.aniseed.cnrs.fr/aniseed/gene/show_gene?unique_id=Cirobu.g00002322	http://ghost.zool.kyoto-u.ac.jp/cgi-bin/fordetailkh21.cgi?name=KH.C11.487;source=kh2013
KH.C14.123	DGKI	DGKB; DGKI; DGKZ	Cirobu.g00003532	5.09485	0.738805	0.23514	-0.00753647	0.99554	0	https://www.aniseed.cnrs.fr/aniseed/gene/show_expression?unique_id=Cirobu.g00003532	https://www.aniseed.cnrs.fr/aniseed/gene/show_gene?unique_id=Cirobu.g00003532	http://ghost.zool.kyoto-u.ac.jp/cgi-bin/fordetailkh21.cgi?name=KH.C14.123;source=kh2013
KH.C8.51	TCTEX1D1	TCTEX1D1; TCTEX1D2; TCTEX1D4	Cirobu.g00009151	2.1617	0.738706	0.386192	-0.673918	0.43369	0	https://www.aniseed.cnrs.fr/aniseed/gene/show_expression?unique_id=Cirobu.g00009151	https://www.aniseed.cnrs.fr/aniseed/gene/show_gene?unique_id=Cirobu.g00009151	http://ghost.zool.kyoto-u.ac.jp/cgi-bin/fordetailkh21.cgi?name=KH.C8.51;source=kh2013
KH.C11.374	KCNH2/6/7	KCNH2; KCNH6; KCNH7	Cirobu.g00002202	6.5452	0.738427	0.128894	-0.664511	0.173393	5	https://www.aniseed.cnrs.fr/aniseed/gene/show_expression?unique_id=Cirobu.g00002202	https://www.aniseed.cnrs.fr/aniseed/gene/show_gene?unique_id=Cirobu.g00002202	http://ghost.zool.kyoto-u.ac.jp/cgi-bin/fordetailkh21.cgi?name=KH.C11.374;source=kh2013
KH.C10.566	KH2013:KH.C10.566	KH.C10.566	Cirobu.g00001797	4.18644	0.737868	0.25311	-0.605147	0.348189	0	https://www.aniseed.cnrs.fr/aniseed/gene/show_expression?unique_id=Cirobu.g00001797	https://www.aniseed.cnrs.fr/aniseed/gene/show_gene?unique_id=Cirobu.g00001797	http://ghost.zool.kyoto-u.ac.jp/cgi-bin/fordetailkh21.cgi?name=KH.C10.566;source=kh2013
KH.C14.82	KH2013:KH.C14.82_GLRX2	GLRX; GLRX2; TXNRD3	Cirobu.g00004092	1.35049	0.73759	0.337336	0.278051	0.715745	0	https://www.aniseed.cnrs.fr/aniseed/gene/show_expression?unique_id=Cirobu.g00004092	https://www.aniseed.cnrs.fr/aniseed/gene/show_gene?unique_id=Cirobu.g00004092	http://ghost.zool.kyoto-u.ac.jp/cgi-bin/fordetailkh21.cgi?name=KH.C14.82;source=kh2013
KH.S546.10	DTYMK	DTYMK	Cirobu.g00014665	5.36917	0.737565	0.0342512	0.189643	0.586415	0	https://www.aniseed.cnrs.fr/aniseed/gene/show_expression?unique_id=Cirobu.g00014665	https://www.aniseed.cnrs.fr/aniseed/gene/show_gene?unique_id=Cirobu.g00014665	http://ghost.zool.kyoto-u.ac.jp/cgi-bin/fordetailkh21.cgi?name=KH.S546.10;source=kh2013
KH.C2.297	KH2013:KH.C2.297	KH.C2.297	Cirobu.g00004481	2.77163	0.737277	0.256515	-0.801317	0.223747	0	https://www.aniseed.cnrs.fr/aniseed/gene/show_expression?unique_id=Cirobu.g00004481	https://www.aniseed.cnrs.fr/aniseed/gene/show_gene?unique_id=Cirobu.g00004481	http://ghost.zool.kyoto-u.ac.jp/cgi-bin/fordetailkh21.cgi?name=KH.C2.297;source=kh2013
KH.S498.2	KH2013:KH.S498.2_EGFR	ERBB2; ERBB3; ERBB4	Cirobu.g00014599	0.588789	0.737073	0.475572	-0.292146	0.781679	0	https://www.aniseed.cnrs.fr/aniseed/gene/show_expression?unique_id=Cirobu.g00014599	https://www.aniseed.cnrs.fr/aniseed/gene/show_gene?unique_id=Cirobu.g00014599	http://ghost.zool.kyoto-u.ac.jp/cgi-bin/fordetailkh21.cgi?name=KH.S498.2;source=kh2013
KH.C11.160	KH2013:KH.C11.160_GJC1	GJC1; GJC2; GJD3	Cirobu.g00001971	4.80116	0.736909	0.357007	1.10608	0.169166	0	https://www.aniseed.cnrs.fr/aniseed/gene/show_expression?unique_id=Cirobu.g00001971	https://www.aniseed.cnrs.fr/aniseed/gene/show_gene?unique_id=Cirobu.g00001971	http://ghost.zool.kyoto-u.ac.jp/cgi-bin/fordetailkh21.cgi?name=KH.C11.160;source=kh2013
KH.C5.212	COX4I1/2	COX4I1; COX4I2	Cirobu.g00007080	5.0634	0.736103	0.0358008	0.0431945	0.904716	4	https://www.aniseed.cnrs.fr/aniseed/gene/show_expression?unique_id=Cirobu.g00007080	https://www.aniseed.cnrs.fr/aniseed/gene/show_gene?unique_id=Cirobu.g00007080	http://ghost.zool.kyoto-u.ac.jp/cgi-bin/fordetailkh21.cgi?name=KH.C5.212;source=kh2013
KH.C7.224	ANK2/3	ANK2; ANK3; MIB1	Cirobu.g00008052	1.01613	0.736033	0.405621	0.310685	0.73817	0	https://www.aniseed.cnrs.fr/aniseed/gene/show_expression?unique_id=Cirobu.g00008052	https://www.aniseed.cnrs.fr/aniseed/gene/show_gene?unique_id=Cirobu.g00008052	http://ghost.zool.kyoto-u.ac.jp/cgi-bin/fordetailkh21.cgi?name=KH.C7.224;source=kh2013
KH.C1.746	KH2013:KH.C1.746_TMEM26	TMEM26	Cirobu.g00001015	4.10838	0.736018	0.487534	0.449149	0.675115	0	https://www.aniseed.cnrs.fr/aniseed/gene/show_expression?unique_id=Cirobu.g00001015	https://www.aniseed.cnrs.fr/aniseed/gene/show_gene?unique_id=Cirobu.g00001015	http://ghost.zool.kyoto-u.ac.jp/cgi-bin/fordetailkh21.cgi?name=KH.C1.746;source=kh2013
KH.C12.503	VTN	VTN	Cirobu.g00003064	2.11062	0.735354	0.259964	0.086603	0.922725	0	https://www.aniseed.cnrs.fr/aniseed/gene/show_expression?unique_id=Cirobu.g00003064	https://www.aniseed.cnrs.fr/aniseed/gene/show_gene?unique_id=Cirobu.g00003064	http://ghost.zool.kyoto-u.ac.jp/cgi-bin/fordetailkh21.cgi?name=KH.C12.503;source=kh2013
KH.C5.90	CBFB	CBFB	Cirobu.g00007603	4.52584	0.735176	0.669005	0.083891	0.96289	13	https://www.aniseed.cnrs.fr/aniseed/gene/show_expression?unique_id=Cirobu.g00007603	https://www.aniseed.cnrs.fr/aniseed/gene/show_gene?unique_id=Cirobu.g00007603	http://ghost.zool.kyoto-u.ac.jp/cgi-bin/fordetailkh21.cgi?name=KH.C5.90;source=kh2013
KH.S567.4	KH2013:KH.S567.4	KH.S567.4	Cirobu.g00014705	0.41039	0.734514	0.40246	0.28479	0.728736	0	https://www.aniseed.cnrs.fr/aniseed/gene/show_expression?unique_id=Cirobu.g00014705	https://www.aniseed.cnrs.fr/aniseed/gene/show_gene?unique_id=Cirobu.g00014705	http://ghost.zool.kyoto-u.ac.jp/cgi-bin/fordetailkh21.cgi?name=KH.S567.4;source=kh2013
KH.C5.177	HIAT1	MFSD14A; MFSD14B; MFSD14C	Cirobu.g00007040	5.50127	0.734284	0.0254429	-0.035268	0.915975	3	https://www.aniseed.cnrs.fr/aniseed/gene/show_expression?unique_id=Cirobu.g00007040	https://www.aniseed.cnrs.fr/aniseed/gene/show_gene?unique_id=Cirobu.g00007040	http://ghost.zool.kyoto-u.ac.jp/cgi-bin/fordetailkh21.cgi?name=KH.C5.177;source=kh2013
KH.L96.8	KH2013:KH.L96.8_TTK	ERN2; MINK1; TTK	Cirobu.g00013427	2.23447	0.733731	0.324476	-0.281255	0.726779	0	https://www.aniseed.cnrs.fr/aniseed/gene/show_expression?unique_id=Cirobu.g00013427	https://www.aniseed.cnrs.fr/aniseed/gene/show_gene?unique_id=Cirobu.g00013427	http://ghost.zool.kyoto-u.ac.jp/cgi-bin/fordetailkh21.cgi?name=KH.L96.8;source=kh2013
KH.C1.733	KH2013:KH.C1.733	KH.C1.733	Cirobu.g00001001	1.53969	0.733639	0.640911	-0.635763	0.684899	0	https://www.aniseed.cnrs.fr/aniseed/gene/show_expression?unique_id=Cirobu.g00001001	https://www.aniseed.cnrs.fr/aniseed/gene/show_gene?unique_id=Cirobu.g00001001	http://ghost.zool.kyoto-u.ac.jp/cgi-bin/fordetailkh21.cgi?name=KH.C1.733;source=kh2013
[truncated: 10,657 more rows]
