# Supplementary material for: Regulation of Neurogenesis by FGF Signaling and Neurogenin in the Invertebrate Chordate Ciona
Source: Front Cell Dev Biol. 2020 Jun 23;8:477. doi: 10.3389/fcell.2020.00477 (PMC7324659; doi:10.3389/fcell.2020.00477)
Supplement: Supplementary file 3 [file Data_Sheet_3.xlsx]

## Sheet: Supplemental_Table_3_Query
Our Name	KH ID	Unique Name	Top3 BLAST hits in human	ANISEED ID	logCPM	logFC Neurog vs lacZ	Pvalue Neurog vs. lacZ	logFC NeurogWRPW vs lacZ	Pvalue NeurogWRPW vs. lacZ	No of ISH Results on ANISEED	ISH URL	ANISEED URL	GHOST URL	Our ISH result	Template type	Probe length	Probe sequence
Adh-related	KH.L170.62	KH2013:KH.L170.62_SORD	ADH1A; ADH5; SORD	Cirobu.g00011800	5.25873	1.67382	0.0809146	-1.29643	0.173328	0	https://www.aniseed.cnrs.fr/aniseed/gene/show_expression?unique_id=Cirobu.g00011800	https://www.aniseed.cnrs.fr/aniseed/gene/show_gene?unique_id=Cirobu.g00011800	http://ghost.zool.kyoto-u.ac.jp/cgi-bin/fordetailkh21.cgi?name=KH.L170.62;source=kh2013	BTNs	Twist BioScience	500	ATACGGGCATTGTGCCCTTAACGACGGTGGTGGTTTCAGCGGTTGCTATGCGACGCATATGTTGCTAAGGGCGGGAACCCATATCGTACCTCTACCGCCTCAAGTGACGGACAAGATGGCGGCCCCAATAAACTGCGCATTGGCTACAATTGTAAATGTCGTGGAAAACGCAAGAACCCAAAGTCGTAACAAAGTCGCAGTGGTGCAGGGAGCCGGTATATTGGGAACATACGCGTGTGCCATGTTGTCACGTAAGGGCTACCAACGCGTACTGTGTACCGACGTCAATCAATCTCGGTTGAACGTGGTTCGTAAGTTTGGTGGGGAACCGCTGTATGTGCAAGACGTATCGAAATATACAGATTTCGCCGACTGTGTAATTGAGGTATGCGGGTCTCC…
Adra2	KH.C7.131	ADRA2C	ADRA2A; ADRA2B; DRD2	Cirobu.g00007952	5.10341	3.56293	0.000102148	-2.77859	0.00204542	2	https://www.aniseed.cnrs.fr/aniseed/gene/show_expression?unique_id=Cirobu.g00007952	https://www.aniseed.cnrs.fr/aniseed/gene/show_gene?unique_id=Cirobu.g00007952	http://ghost.zool.kyoto-u.ac.jp/cgi-bin/fordetailkh21.cgi?name=KH.C7.131;source=kh2013	BTNs	Twist BioScience	500	GAGGTATAATCAACAGTAAGCCGGATGGTGCTGTGACGAAAGAGTCGACGGTTTACGTCAGAAATCCACCCGATCCGGTGTTTTGTTGCTGCCTTTGTAGCCAAACCGAAGATAAAAGTAATCTAATTTTTTTTCGGCCACTTAAGAAAGAATCTATCAACGGTGACGTCACAAAATCAAACTTTGTGAAACGCCTTCAAAGTTTATCATCCGTGACCACTTTGTATAACAGAAGTTCACAATCTCAGCAGAGCTCATGTACCACGGCAATGTCACGACGTGAAAGACGATTCGTGTGCATCATCAGTATTATCACGGGTTGCTTCATGGCGTGTTGGATGCCTTTCTTTCTGACGTACATGATTTATGCTGTGTGTCGGGCGTGCTGCATCAACAACA…
Anoctamin 7	KH.C8.585	ANO7	ANO4; ANO5; ANO7	Cirobu.g00009232	6.26759	2.15909	0.016305	-2.64276	0.00403697	0	https://www.aniseed.cnrs.fr/aniseed/gene/show_expression?unique_id=Cirobu.g00009232	https://www.aniseed.cnrs.fr/aniseed/gene/show_gene?unique_id=Cirobu.g00009232	http://ghost.zool.kyoto-u.ac.jp/cgi-bin/fordetailkh21.cgi?name=KH.C8.585;source=kh2013	BTNs	Twist BioScience	500	TTATGGAAAGTTCCTTGGTATCCGAAACGAGGCGTGTGGAAGTGGAGGTTGTTTGATAGATCTTGCTCTTCAATTATTTATTATTATGGTCGGAAAACAAGCAATAAATAATGTGCAAGAATTAATTCTTCCGAAACTTTTCCAGTGGTGGCAACGAAGGCAGGTGAAAAAAGCATTTGGAGCCGAACAGAAAAGTAAAATGACAAAACCATGGGAAAAAGAATACCTTAAACTGGTGCATTACGAAGGATTGTTTGAAGAGTATCTTGAAATGGTGCTCCAATTTGGATTCATCACTATATTTGTTGCTGCCTTCCCCCTCGCACCATTATTTGCATTGCTGAACAACTGGATTGAGATACGTCTTGATGCGAGTAAACTAGTTTGCGAGATGAGAAG…
Basigin	KH.C5.79	VSTM2A	BSG; NPTN; VSIG2	Cirobu.g00007590	3.8437	1.87615	0.000220396	-1.85585	0.000444283	0	https://www.aniseed.cnrs.fr/aniseed/gene/show_expression?unique_id=Cirobu.g00007590	https://www.aniseed.cnrs.fr/aniseed/gene/show_gene?unique_id=Cirobu.g00007590	http://ghost.zool.kyoto-u.ac.jp/cgi-bin/fordetailkh21.cgi?name=KH.C5.79;source=kh2013	BTNs	RT-PCR	701	TCTGCTGAGATCATCCAACGTCCTGATGACGTCATTGGGGCTGATTGCGGCAAGGAGATACGAGTGACGTGTATGGCTCGATCACGTGACGAACCAAAGATAACACGACCCACGCCAGACATTGAATGGTGGTTTAAGGAACAACAGGAGTCTATGACGTCACAATCACGAAAAATACACCGACTGGACAGAGAAGAAAGAGTAAAAATATTAGTGGAGGTGTTCACAGTGGTCAAAAGTACCTTGATAATCAAGGATGCGCAGCCAGGCGACGAAGGCGTATATCAGTGCAGAGCAAGTAATAGTCCTAACCGTTATAAAGAGGGAGTTAATTTGTACCAGCACTGGAAAATCGAAGAGGCCCCCGTGACTAATATGAAGTGTGGAGAAGAAACGCCA…
Bhlh-tun2	KH.C4.649	NHLH1/2	NHLH1; NHLH2; TAL2	Cirobu.g00006758	5.77402	3.69483	5.34e-05	-2.29827	0.0082604	0	https://www.aniseed.cnrs.fr/aniseed/gene/show_expression?unique_id=Cirobu.g00006758	https://www.aniseed.cnrs.fr/aniseed/gene/show_gene?unique_id=Cirobu.g00006758	http://ghost.zool.kyoto-u.ac.jp/cgi-bin/fordetailkh21.cgi?name=KH.C4.649;source=kh2013	BTNs	Twist BioScience	500	ATCTCGAGCAGTATAGGAGTCAAAGCCTATAAGGTAGCGCACTAAAAAGCTGAAATATTTTGTCAAGTTTTATACAAACTTCTATCAACATGAGTTTACGTCATTCGAGTACGGTTTCAAAGAAGCGGAAGCCGCTGAAGCGAAATCTCCAAGCTGAGAAAAGAAAACGAAGTCGTATGGTTGCTCTGCATGTCGCGTTTGCTCGTCTCCGCCGCCTCTTGCCCCCAACCAACCCACCAAAGAATCGGATGAGTGAAATTGAAATCCTACAGCAGACTTTAAGATATATAATCTTTCTAAACCGAATGTTATGCAAGTAAGGCGTACAGTTACCGGGAACTTACTGTACAGTGGACAAAACCCTGGGTGGGGAGAACTCTGAATCGCCCACAAACACTT…
Camk4	KH.C4.437	CAMK4	CAMK1D; CAMK4; PNCK	Cirobu.g00006528	5.60501	2.13805	0.0016527	-1.12124	0.0913261	0	https://www.aniseed.cnrs.fr/aniseed/gene/show_expression?unique_id=Cirobu.g00006528	https://www.aniseed.cnrs.fr/aniseed/gene/show_gene?unique_id=Cirobu.g00006528	http://ghost.zool.kyoto-u.ac.jp/cgi-bin/fordetailkh21.cgi?name=KH.C4.437;source=kh2013	BTNs	Twist BioScience	500	ATGGAAAAGAAAGTAATTTCTAAAAAAGCCCCTTGGTTTGACTATGCTAGTAAAGGAGCATTGGAGGATTTCTACACAATACAAGAAACATTAGGAAGAGGTGCTAGCTCAGTTGTGAAGGTTGCGGAAAAAAATGGAACCGGTGAAAAATATGCTGTTAAAATTTTGAGCAAAAAGGCTGAAAAGAAACTCGTGCAGACTGAGATTGGTATATTGCTTACGTTGTCTCATCCACACATTATCAAACTATTTGACATTTATGAATCTGGCACTAATGTCTACTTGGTTTTGGAAAGAGTCACTGGCGGAGAATTATTTGACAGAATTGTTTCAAGAGGCTGGTACAGTGAAAGAGATGCTGCCCACGCCCTCAAACAAATTTTACAAGCAGTTTCGTAT…
Cadps	KH.C8.50	CADPS/2	CADPS; CADPS2; UNC13A	Cirobu.g00009140	7.22931	1.632	0.0133909	-0.526977	0.414656	0	https://www.aniseed.cnrs.fr/aniseed/gene/show_expression?unique_id=Cirobu.g00009140	https://www.aniseed.cnrs.fr/aniseed/gene/show_gene?unique_id=Cirobu.g00009140	http://ghost.zool.kyoto-u.ac.jp/cgi-bin/fordetailkh21.cgi?name=KH.C8.50;source=kh2013	BTNs	Twist BioScience	500	CTGATACTTGGAATTCATTCCCTCTGTTCCAACTTCTTAATGATTATCTCATTAATGACCATACTTTAAGAGACGGTCGCTTCCATTGTCATCTTCGTGACACATTTGCACCACTTGTGATAAGATATACCGACCTCATGGAATCTTCCATCGCACAATCTATTCATCATGGCTTTGGTAAAGATGGTTGGAGCTCAAGCAACTCAGGCAAAAACACGATAGCAAACGATGTTTTATGGAAACTTGATGCTCTGCAATCATTTGTACGAGAACTACACTGGCCAGATGCAATATTTGCTTGTCACATCGAACACAGACTTAAACTTATGGCATCGGACATGATTCAAAGTGTTGTGTCAAGAACTGTCCAGAGGTTTAATGTTATCTTGGCTTCATGTC…
Cdk5r	KH.C4.760	CDK5R1/2	CDK5R1; CDK5R2	Cirobu.g00006881	7.39975	2.31157	1.9e-06	-1.27544	0.00685898	1	https://www.aniseed.cnrs.fr/aniseed/gene/show_expression?unique_id=Cirobu.g00006881	https://www.aniseed.cnrs.fr/aniseed/gene/show_gene?unique_id=Cirobu.g00006881	http://ghost.zool.kyoto-u.ac.jp/cgi-bin/fordetailkh21.cgi?name=KH.C4.760;source=kh2013	BTNs	Twist BioScience	500	AACCATGGGGAATACTGTTACTGGAGAAGTTCATAGAGACCAACGCATTTCAAGCATCGAAAACTTGAAACAGATTCCTTTCATTGAAAATGGCCACGGACGAAAGAAAAGGTCAATCATATTTAGCAGTTCGACTTGGAAACGATTGGTCGAGTCAACAAGAAGGAAAGGCGGCAAAGGTTCCAAGGTCAACCCGTCACAATCGTATCCTGATGGAACTTTTTACCAAACACACAACGGTAATGTGCTATCCCGCCACCCAAACGGTCTGCCATCTGGACACAATAATAGCATCAAGAAGTCGCAATCTCTGTACGTGATTAACACCAAAAGCGGTGTTGTAGACACTAAGCCTGTATACCAGCAGCCAAAAGATGAAAAAGTAGACCTGAGCAATCA…
Claudin7	KH.C10.182	KH2013:KH.C10.182	CLDN1; CLDN19; CLDN7	Cirobu.g00001382	2.79843	2.83895	0.0414109	-1.63168	0.22477	0	https://www.aniseed.cnrs.fr/aniseed/gene/show_expression?unique_id=Cirobu.g00001382	https://www.aniseed.cnrs.fr/aniseed/gene/show_gene?unique_id=Cirobu.g00001382	http://ghost.zool.kyoto-u.ac.jp/cgi-bin/fordetailkh21.cgi?name=KH.C10.182;source=kh2013	BTNs	Twist BioScience	500	CTAAAACATGGAACATGGCAATCTCGAGTTGTCAAATAGTTGGATATTTAGTTGGAATTTTAACATGGCTTGGAGCTTTGCTTGTGGTCACACTACCGGATTGGAAACACAGTTACGTTTCAGAAAGATCTTTCTCGGGAGTTTTGGTTGTTCGAGGTTTATGGACAACTTGTACAGTAAAGGAATCTGGATCTGTTGAATGTATAAATATCAGTGAACCTGTGTTTGCATTACCAACTTTGATCAAGGGATGCAGGACACTATCGGTGCTCGGTACAGTTCTAGCTTTTTGTGCAGTGGCGATTACCCCGCTTGGAATGAGGTGCACTAGAATAGGAGGAGACGCAAAAACAAAGCTTCGGATTGCGAGATGTTGTGCTGTCTTATTCGGTCTTGCCG…
Cpe	KH.C12.16	CPE	CPD; CPE; CPN1	Cirobu.g00002688	6.54625	2.52933	0.000555074	-0.866007	0.216042	7	https://www.aniseed.cnrs.fr/aniseed/gene/show_expression?unique_id=Cirobu.g00002688	https://www.aniseed.cnrs.fr/aniseed/gene/show_gene?unique_id=Cirobu.g00002688	http://ghost.zool.kyoto-u.ac.jp/cgi-bin/fordetailkh21.cgi?name=KH.C12.16;source=kh2013	BTNs	Twist BioScience	500	CATGATGGGACCACTAATGGCGCTGCGTGGTACAGTATAGGGGGAGGCATGCAGGACTTCAATTATCTTGCCAGCAACTGTTTTGAGATCACGATTGAGATGAGTTGTGTTAAGTTTCCACCCGCTTATTCATTACCCGTGTTCTGGCAACTAAACCAAAACGCAATGATCGATTATATTTACCAGTCCACATGTGGCGTTAAGGGGTTCCTCTACGACGCCGCTAGCGGCGCCCCAGTGCCCGATGCCGCTGTAATAGTGGAGGGAATACATCACGTGGTATATTCTGCTGCTGATGGCGATTACTGGCGCCTCCTCGTGGCAGGAAACTACGCAATTCGTGTCCAGGCTCAAGGATACGAACTCAGTGAAATTAAAACTGTCCAAATCCCTGAGTGT…
Dcdc2	KH.C14.65	DCDC2B	DCDC2; DCDC2B; DCDC2C	Cirobu.g00004073	9.16985	1.63368	0.0108675	-0.700789	0.265047	0	https://www.aniseed.cnrs.fr/aniseed/gene/show_expression?unique_id=Cirobu.g00004073	https://www.aniseed.cnrs.fr/aniseed/gene/show_gene?unique_id=Cirobu.g00004073	http://ghost.zool.kyoto-u.ac.jp/cgi-bin/fordetailkh21.cgi?name=KH.C14.65;source=kh2013	BTNs	Twist BioScience	500	GAACCTGAGAAACATAACGAGGTAACTTCTGATGTTAATGAAGAAAATCTAGCCAATAACGAAGCTTCGATTTCTGAGGATCTTGCTGAGGATGAACATGTTGAACAAGAACCAGTAAATGCAGTTGAAGATTTAGAAAAAGATGATGATCAAGTGTTATCGGAAGAAATCAGACCTGTAACTCCTTCTTCCCCAATCCCAACCACAGAGGAGGATGCTCTTATTAGTTTTGATGATACTCCAAAAGAAACTACTGAAGATCTCAAAGAACAACCTGATATACAAAGGTCTTCTGCAGATGGTGAAGCGATCATTCCAACTGAAAACTCTGAGAATGTGGTTACAGAAGACGCGGTTCCCCTTGACAACAATGGCAATGTTGATGAATCACTCAAATTG…
Dcx	KH.C9.150	DCLK1/2	DCLK1; DCLK2; DCX	Cirobu.g00009669	6.64412	2.25582	0.000248144	-1.4466	0.0164575	0	https://www.aniseed.cnrs.fr/aniseed/gene/show_expression?unique_id=Cirobu.g00009669	https://www.aniseed.cnrs.fr/aniseed/gene/show_gene?unique_id=Cirobu.g00009669	http://ghost.zool.kyoto-u.ac.jp/cgi-bin/fordetailkh21.cgi?name=KH.C9.150;source=kh2013	BTNs	RT-PCR	1003	ACAATTTGGTGGGGAATCAAAAGGTCGAAGAAAAAGTAGTGGCTTGTCCAGAAACCCTAGTTATGGCTCGCAGAACAATTTGTACAGGGCCAGATCCTTACAAAGAATCGCCGACGAAAAAAGAGCAAAAAAGGTTCGGTTTTATCGAAATGGTGATAATTTTCACACCGGACTTGTGTACGCTGTTTCCACCACACGTTTCCGTACATTTGAAGCAATGCTTATTGATCTTACCAACCGTCTTGCTGATAAAGTACATCTGCCTCATGGTGTTAGGGTTGTGTTCTCTTTAGATGGGGCGCGGAAGATTGAAACTATACAAGAACTTGAACATGGTGAAAGCTATGTATGTGCTTCATCAGACATGTTTAAACGTCTTGAATACGGACGTAACACCAA…
Dhcr7	KH.C2.506	DHCR7	DHCR7; LBR; TM7SF2	Cirobu.g00004711	6.74497	2.11377	4.63e-08	-0.108337	0.776523	0	https://www.aniseed.cnrs.fr/aniseed/gene/show_expression?unique_id=Cirobu.g00004711	https://www.aniseed.cnrs.fr/aniseed/gene/show_gene?unique_id=Cirobu.g00004711	http://ghost.zool.kyoto-u.ac.jp/cgi-bin/fordetailkh21.cgi?name=KH.C2.506;source=kh2013	BTNs	Twist BioScience	500	ATGGAGAGTAATGCACAAACACGCCACCGTGTCTCGACCAATGGGAAACAAGGTACGACTTCGAATAACAACAACATAAAAAGTTCATCGGCAACTGGCCAATGGGGCAGAGCATGGCGTGTGGATGTTTGGACATTCTTTGGATGTCTTTTCGTTCTGTTCGTGTGCCCAATTCTGCCGTTAACCTTTTATGCATCGTGTACCCACCACGAGTGTAGTCTGGTCGAAACAGCTTACTCTGTGTGGTCCGGATCATTGGATTTTTCTTTACCGGCCGTTTCTGGTTTTGCCGCTCGGACATATTTTACCTGGATTGCATTTCAGATTCTTCTTTCTGCATTGCCCGACATCGTACACTTGATTCTACCACGTTACGTTGGTGGTATTCAACCTGGCGCA…
Fastkd	KH.L170.66	FASTKD2/3/5	FASTKD2; TBRG4	Cirobu.g00011804	7.6473	2.02346	0.000324939	-0.916328	0.094287	1	https://www.aniseed.cnrs.fr/aniseed/gene/show_expression?unique_id=Cirobu.g00011804	https://www.aniseed.cnrs.fr/aniseed/gene/show_gene?unique_id=Cirobu.g00011804	http://ghost.zool.kyoto-u.ac.jp/cgi-bin/fordetailkh21.cgi?name=KH.L170.66;source=kh2013	BTNs	Twist BioScience	500	CAGATGAGGAACTCCTTCAAGTCATCTCGCAATGCTCGTCACCACTAGATGTCCTCGCATGCGTCCACCTTCACTCAACAACACTAAGCCCGATTTTATCAGTGGCTTGCATTCACCACATCTATCTGAAAACTTTGGCAAAATATCCACGCAACTCAACAGAGTATAACAAGCTCTGTGGTGAAGTTCTAACAAACCGTGATTTCCGTGACCTTGTGTTCATTATTGAGACAAACGTGAAGTTCATGAACAACTTTGCCCTGCTTACTGCAGCATCTGACTTGCTCTACCTGCGTTTAACACTAAAGCAATCCACCATACCAGTTCTGTTGTCGCATATTGAATTTGAAAGCATGGATTTAGATGAGCTTCGTTTGCTTGCAAGTTGCCTCCACACCC…
Fibulin-related	KH.C10.457	KH2013:KH.C10.457_T05B4.12/13/8	EFEMP2; FBLN1; FBLN5	Cirobu.g00001679	8.20159	1.30951	0.0341307	-0.460962	0.449588	0	https://www.aniseed.cnrs.fr/aniseed/gene/show_expression?unique_id=Cirobu.g00001679	https://www.aniseed.cnrs.fr/aniseed/gene/show_gene?unique_id=Cirobu.g00001679	http://ghost.zool.kyoto-u.ac.jp/cgi-bin/fordetailkh21.cgi?name=KH.C10.457;source=kh2013	BTNs	Twist BioScience	500	ATTGGAAGATTTTGTCGTGATGTGAACGAATGCACTCATTCCCCATGTGATTCAAACCAGTACTGTATTAACAGCAGGGGTAGTTATCACTGTCGTTGTAAGGCGGGTTACTCTGATGCGGGTGACGGGTCGTGTGTGGATACGGATGAATGCGCACAAGGGATGTGTCAAGCGCTGGGAGAGACATGCAGAAACACAGTTGGTTCATATGAGTGTGTATGCGATAGAGGATTTACAAAGGACCCCACTACTAATGGAAGATACTGTATGGACGTGAATGAATGTGACTTGGATATGTGTAGCGAGAATTCTGAATGCATCAACACACAAGGCTCGTACTTCTGTAGATGCCATCGTGGATATACTAAACATCAAGGTGTATGTGTCGACAACCAGGAA…
Follistatin-like	KH.C12.301	KH2013:KH.C12.301_FSTL4/5	FSTL4; FSTL5; IGDCC3	Cirobu.g00002844	8.89522	2.58163	1.79e-06	-1.46707	0.00489185	3	https://www.aniseed.cnrs.fr/aniseed/gene/show_expression?unique_id=Cirobu.g00002844	https://www.aniseed.cnrs.fr/aniseed/gene/show_gene?unique_id=Cirobu.g00002844	http://ghost.zool.kyoto-u.ac.jp/cgi-bin/fordetailkh21.cgi?name=KH.C12.301;source=kh2013	BTNs	RT-PCR	1004	TTGTGTGTGCAAAAGCCATTGCAAGGCTATTAAGAAGCCTGTATGCGGAACTGACGGCCTGTATTATGAAAACCATTGTGAGATGCACAGAGCAGCGTGTGTGATCGGACAAGACATTTACGATGCTCGACACAAAGACTGCTTTTACCAACAAATAAGAAACGATGAAACATTGAAAGAGACATCTATCCAAGAGCAAAGCACTGTAGCTCCTGAAACCCAGGCTACCAACATTATTGTGTTCGGGGACGATGGCCTCGTACCTTATGATGACATCATCACGAATGACATCAGAGGCGACGGCGTGAAGAGTATATTCCGCTTCATGGACATTGATATGGATGGTTTTGTTGGTAGCGACGAAATATACCAGCTGTCGATGTTGGAGGACTTGGATTC…
Gabrd	KH.C1.1254	GABRD	GLRB	Cirobu.g00000282	5.93809	2.79631	6.08e-05	-1.31972	0.0484551	0	https://www.aniseed.cnrs.fr/aniseed/gene/show_expression?unique_id=Cirobu.g00000282	https://www.aniseed.cnrs.fr/aniseed/gene/show_gene?unique_id=Cirobu.g00000282	http://ghost.zool.kyoto-u.ac.jp/cgi-bin/fordetailkh21.cgi?name=KH.C1.1254;source=kh2013	BTNs	RT-PCR	991	AGAGCACGAGGTACCAGCATCATAAACTATCGGACGACGTAGCGATTATATTCCGTAGTCTTCCGTCCCTGGGCGACGGACAAGAAGACACGAAATCAACAAGTACAGATTTGACCCCAAAACACCCAAAGGGGCTTAAAATGCAAGTTCCGTCGTCATTACAACGAATCAACCCACGAAAATGTTTGCCTTCGGATGCCGAATCATTGGATGTGTTTTTCCGTGTTGGTTATTTCTATTCATTCCTTGTATTCAACGGAATTTACTGGGGTTACTATGTAATGGCTACACAACATGAGGGTGGGGAAGAGAGCTAGTTGAAACTGAACACCAGGACGTTTTATTGGAAACTCGACACTGTGGGGACACTTTTTTCAATACAGAGTGTAACACTCGTGT…
Gcnt2	KH.C2.1091	GCNT2	GCNT1; GCNT2; GCNT3	Cirobu.g00004214	1.47697	1.74023	0.131259	-2.84456	0.0215466	0	https://www.aniseed.cnrs.fr/aniseed/gene/show_expression?unique_id=Cirobu.g00004214	https://www.aniseed.cnrs.fr/aniseed/gene/show_gene?unique_id=Cirobu.g00004214	http://ghost.zool.kyoto-u.ac.jp/cgi-bin/fordetailkh21.cgi?name=KH.C2.1091;source=kh2013	BTNs	RT-PCR	975	TGCGCACCAATATGGAGATAATTGAACAGATGAAACATCTGAAGAACACCAACCTTATTCTTGGCTGTAAAGCTCACGATAAGTTAACATTACGAAGGACACAAGTTGTGTATCGATTGGAAAATGCAACCGACCCTAGCCAGCCTGCCAAAATGCGTGAAACCGATATTGAGCATCCGCCACCCCCATACAACATGACCATCAACAAAAGTTTGGCGTACAACTTTTTCACGAGAGATTTTATAGACTGGGTAATCTACAAGACGAATAAATCAAAAGCGTTGCTTGAATGGTCACGTGACACCTACAGTCCTGACGAGCAATACTGGATGACTTTGAATAACGAACCTGACGCACCAGGTGGAAAACCAGGTTTCCAGTGTTGGACGTTGGTCCGTT…
Gnai-related	KH.C2.872	KH2013:KH.C2.872_GPA1	GNAI1; GNAI2; GNAI3	Cirobu.g00005111	5.99944	1.95054	0.00018123	-1.06024	0.038563	3	https://www.aniseed.cnrs.fr/aniseed/gene/show_expression?unique_id=Cirobu.g00005111	https://www.aniseed.cnrs.fr/aniseed/gene/show_gene?unique_id=Cirobu.g00005111	http://ghost.zool.kyoto-u.ac.jp/cgi-bin/fordetailkh21.cgi?name=KH.C2.872;source=kh2013	BTNs	Reeves et al. 2017	620	TTTGACAAAGGTGCTTGGAGACTTGGGGCTTATGACAGAGTAATTACAACTCAGGGGTAACTCGCAAACAACTGCAAGCCAATAGTCACAATAAACACCGGACGGTACAATGTCTGGTTGGAGCCAACGCTGGGCAATGGTTCCTTTGGCGTGGCTGGTATGGAGATATTTATTGCACTATTAGCCTATACTGGTTTTGGTGCACCTGAAAAACAAAAACCGCAGCGAAAGAATGTTCAAGTTATAGACCCCGCGCTTACTTTGTACCGTCACCTAATATGCGTTTTACCATCTATTCTACAGATTACATGGCTACAGCTACCTTCCATTTTTCACATTTCTTTCCCCCCTTTTTTACAGTGGACCAACAACAACAAAAACAAACGAATTAAACCAAGT…
Gpr22	KH.L139.24	GPR22	ADORA2A; GPR22; MCHR1	Cirobu.g00011138	4.50699	2.36194	1.29e-07	-1.16716	0.0105585	0	https://www.aniseed.cnrs.fr/aniseed/gene/show_expression?unique_id=Cirobu.g00011138	https://www.aniseed.cnrs.fr/aniseed/gene/show_gene?unique_id=Cirobu.g00011138	http://ghost.zool.kyoto-u.ac.jp/cgi-bin/fordetailkh21.cgi?name=KH.L139.24;source=kh2013	BTNs	Twist BioScience	500	GGCGAATGACGATCCTTATTATTGTAACGTTTTTCGTGAGTTGGGTTCCGTTTCATATTCTGCCGATGGTGCAGTTTCTAACCAAAGACACCCCGAACCTCTTTATAATCTGCCATGCTTCTGATTGCGCTGGAAGTCTTGAGATTTTGAACTCTACAAAGTTTGTGAGCGTCCATAATGCGAAAGTGGAAAACGAGAAAAGTTTCTGGAACGGTTTGTTCTTATGGACACTCGTGTTCGCTGCAGCGTCATCGGTGCTTAACCCGTTCGTGTACAGTTTCTCCCGCGAGAAAATCCGGGAAGATTTCAAGAGAACGTTCGGTTTCAAGATCAAGTTTAGACGCAAAGAGAAAAAGTTTTCCGCCGGAAATCGGATGCGAACCAGAGGCGGATCGGCCA…
Hdhd5	KH.S1075.1	YKR070W	HDHD5; PGP	Cirobu.g00013566	6.26377	2.91709	0.00299771	-1.92448	0.0423845	2	https://www.aniseed.cnrs.fr/aniseed/gene/show_expression?unique_id=Cirobu.g00013566	https://www.aniseed.cnrs.fr/aniseed/gene/show_gene?unique_id=Cirobu.g00013566	http://ghost.zool.kyoto-u.ac.jp/cgi-bin/fordetailkh21.cgi?name=KH.S1075.1;source=kh2013	BTNs	Twist BioScience	500	CTGATCAACGCGTGCACGTCCGTGCTTGTTTGCACTGGAGTCTACAAACCCGAGCTCGGTGACCCCAACCAGACCATTGGGGAGGATGAGGTTTTCCAAAACTCGGAGTTGGAGCCCAGCGTCTCGCCTGTGGCTCCCCCTCAACCCAAGAGGAGAGATTCGGTCATCGATCACGGGCATCGTGATCTTCCATACACAGAGGAAATGACCCGCGCCGATCACACGGTCTTTGACGTCAAACGGGCAATCGGAAAGATTTTGGAATTGGAGAATTGGAAATATTAAACTCTCTCCTTTTCTCATTACCAGTCATGCCAAACTGTTCAAAATATGCGGAATGAAATGTAATTGACTTCCAAAACTAGCGTTTGCCTTGCCTGCACGGGAAGGTATTTTTTC…
KH.C14.470	KH.C14.470	KH2013:KH.C14.470	KH.C14.470	Cirobu.g00003908	4.03271	3.29828	0.0489025	-2.62349	0.107114	0	https://www.aniseed.cnrs.fr/aniseed/gene/show_expression?unique_id=Cirobu.g00003908	https://www.aniseed.cnrs.fr/aniseed/gene/show_gene?unique_id=Cirobu.g00003908	http://ghost.zool.kyoto-u.ac.jp/cgi-bin/fordetailkh21.cgi?name=KH.C14.470;source=kh2013	BTNs	Twist BioScience	500	AAGAAAGACGAAATTTAAAATGGACAAAGATTTTTCAACAAGAGTTGCATTTATGCTTGTTATATTATGCTGTGGGAATATACTAGAGGTGGAAACTAAAGTAGTCAGCTTCAGAAGTTTATGGACGCAGTTAGTGAAATGCGAGGGTGTGATCAACTTAAGATGTCGTTATTTATCACATTATTGCAACGTTGAGGTTCTGAAGCGAGGAGAAACGAACTTCAACAGCGATAAAGGATCTTCAGATTACGACGAGCAAGATTTTAACGAGCTCGGTTTGGTAAAGAAAGCAAAAGAAGTTCGAATGATATCAATGAATTGTGCATCTTGCAACAAATATTGCTGGTAGTTCTTCGAATGTTTGGACAGGAGAGCCAATTTAGATTGAAACGACGCAGT…
KH.C2.491	KH.C2.491	KH2013:KH.C2.491	KH.C2.491	Cirobu.g00004694	4.39926	2.88063	0.0850834	-2.69344	0.105233	0	https://www.aniseed.cnrs.fr/aniseed/gene/show_expression?unique_id=Cirobu.g00004694	https://www.aniseed.cnrs.fr/aniseed/gene/show_gene?unique_id=Cirobu.g00004694	http://ghost.zool.kyoto-u.ac.jp/cgi-bin/fordetailkh21.cgi?name=KH.C2.491;source=kh2013	BTNs	Twist BioScience	500	ATGTGTGGCTTATTTCGCACGGCAACTCTCGCGTTCTGTCTAATTGGAGTAGTGGTCAGTGCTCCGACGAAGTCATATGTGGAAGACATTCTAAAGAAAATGATACGGGAAGAAGAGGCTTCTCTTCCGCAGGAGCAGAATGACATCTCAAACTTCCGGAATTCCGACTACCAACCTCTGCGGAAAGAGTTCGGAAACAATGCAGTTAGGAAACGAAACGTTGCATTCGATAAACAGGAGGAATCTTGTGAAGATCTGGAGTGGTTCGTCTTTATTGGCAACATGCCAGCTTGTGTGGCCCCGCTGTGGCAGATCGGCTACGACCCAACGTACTGTAATAAAATGAAAAACGGTTGGGTCTATTGTGGATGTGATACTAACTTCACGCCTGGAATGGCG…
KH.C4.115	KH.C4.115	Ci-R1CiGC26p03	KH.C4.115	Cirobu.g00006181	6.24474	2.54164	0.000141259	-1.3456	0.0371069	1	https://www.aniseed.cnrs.fr/aniseed/gene/show_expression?unique_id=Cirobu.g00006181	https://www.aniseed.cnrs.fr/aniseed/gene/show_gene?unique_id=Cirobu.g00006181	http://ghost.zool.kyoto-u.ac.jp/cgi-bin/fordetailkh21.cgi?name=KH.C4.115;source=kh2013	BTNs	Twist BioScience	500	AACGATCCGGGGGTGGCGTTGCGGAAACATCCGACAATATTGACAACTCTGAAATCGAAATTGAAGAACCCGCTACCCCCTTTGTTACGTCACTGAATGACATCAACGATGAGTTTCTTGTGATACCACTGAAGTATTTACGAAAGCAGATGATGAAGGAAGAAATGATTAACGATGATGTCACTGATGTTGTTAACAAGAAACAAAACGAAGACGACAAAAATGCTAAACTCGAAGATACTGAAACAGGCTTAGATGAGAATAGTACTGATGACGTCACAAAGGGAGCTGAATGGGACGGCGACGCGACTTCGGAGATGGACATGGAGCAATTAAACGCACTCTACCAAGTCCAACTGGATCTAAAAAAATTGGGACAAGACATGAAATATCTGAAGC…
KH.C6.138	KH.C6.138	KH2013:KH.C6.138	KH.C6.138	Cirobu.g00007656	4.77127	1.2724	0.0298646	-0.0602373	0.919891	0	https://www.aniseed.cnrs.fr/aniseed/gene/show_expression?unique_id=Cirobu.g00007656	https://www.aniseed.cnrs.fr/aniseed/gene/show_gene?unique_id=Cirobu.g00007656	http://ghost.zool.kyoto-u.ac.jp/cgi-bin/fordetailkh21.cgi?name=KH.C6.138;source=kh2013	BTNs	Twist BioScience	500	ATTCAGTTGCCTAGCCCTTTGAAATGTGCCTAACAGAACGTGCACTGTCAGCGCAAAAACACATTATTATATTTGTGACAGTTATGTTTTTATTTGGGACAGTGATTAACTGGATGCTGACAACTCAAGAGCGACACCACGCGGAAGAAATAAGACAAACCCAGATCCGCATAGGGCACGTAAAGAACGAATGTGAAAGACAATTAGAGGATTTAAAAGACGAGTACAGAACGGTGCTGGCCCAAAAGCGGCAGATGGAAAACAATAAAAACACGAACAAACCAGACGTCACAGACGAACTAAACAAGCTAAGAGAGGAGAACAGAATTCTGCGAAAAGAAATTTCGCAAGTACGTTCGATAGAGGTCTCTAGCGAGATCGAATTTTCTAAGCGAATTG…
KH.C8.762	KH.C8.762	TGM1/4	TGM1; TGM4	Cirobu.g00009428	3.87986	2.93887	6.2e-06	-2.27355	0.000956082	0	https://www.aniseed.cnrs.fr/aniseed/gene/show_expression?unique_id=Cirobu.g00009428	https://www.aniseed.cnrs.fr/aniseed/gene/show_gene?unique_id=Cirobu.g00009428	http://ghost.zool.kyoto-u.ac.jp/cgi-bin/fordetailkh21.cgi?name=KH.C8.762;source=kh2013	BTNs	Twist BioScience	500	TGTTTAGTAGCATGAAGCTCATTAGGAATGAGACGGGCTCGTACTTGGTCAAAAGCGTACCGTTTTCCTGGCTCGGAGAAATCACTGAGATTGAAGACCTTACAAAAAGCAAAGACTATCTCCAGCAGTATAAAAACACCTCGTATTGGGTGTATTGGGGACCACTATGGGCCATTGCGGCGGCAGTAAGCATTATTATTGTATGTCTCGGATTCGTGAAATTTTTCAATTATGTGGACGAGCGGCTCGACCAAGATGACAATTTAGATCGGACCAGATCAAGTAGAACGGGCAATCTAATCGGTAGCAATTCTGACGAAGCTTTCTACGGTTCAACATCACTGACACAGCTAACCGCAAATAAACCACAAAAAGATACAAAACGTTGACACCAAATCC…
KH.L119.20	KH.L119.20	KH2013:KH.L119.20	KH.L119.20	Cirobu.g00010857	5.95335	2.1589	1.02e-09	-1.44206	5.07e-05	0	https://www.aniseed.cnrs.fr/aniseed/gene/show_expression?unique_id=Cirobu.g00010857	https://www.aniseed.cnrs.fr/aniseed/gene/show_gene?unique_id=Cirobu.g00010857	http://ghost.zool.kyoto-u.ac.jp/cgi-bin/fordetailkh21.cgi?name=KH.L119.20;source=kh2013	BTNs	RT-PCR	1026	GACCGCCTACATCAGCTTTCAGAATTCTCTTTCCCATTCTTCTTATTCTTGGAATATTTATGTTGATTGCAATCAGCGTCGTGTTGCATAGAATTGTACTGAAATTGGTTCGCAAAAGATGGTCATCAACTTTATCCCGTCAACGAAATAACGATGAATCTGAAACATCCCGACGTGTGAACACTGTTAGTCAATATACAGATAATCCACCAAGTTATAACCAGGTGCTGGCCAACATTGAAGAAGACTCGTTACCTACATATTATCAGGTCATGAACGGAATCGTGAACCTTGGATTTATGAACGAGGTTCATGTGATGCAATCATCACAATCACAGGGTCAGACTTCAACGTCCAATAGTGCAGATCATTTAACAAGGCAACCAACAGATTCTGTGA…
KH.S1313.1	KH.S1313.1	KH2013:KH.S1313.1	KH.S1313.1	Cirobu.g00013787	5.30821	1.60472	0.102591	-1.18298	0.224981	0	https://www.aniseed.cnrs.fr/aniseed/gene/show_expression?unique_id=Cirobu.g00013787	https://www.aniseed.cnrs.fr/aniseed/gene/show_gene?unique_id=Cirobu.g00013787	http://ghost.zool.kyoto-u.ac.jp/cgi-bin/fordetailkh21.cgi?name=KH.S1313.1;source=kh2013	BTNs	Twist BioScience	500	TTCCTCCAGCCCACAAACCAAGAGACGGAACCTGCCAAAGATTGAGGCTGTAACAAGAATTCAGCGGGAAATGGCGAGCCCAACACCCCGCAGAGGCGAGCATTATTCTGATCTCCAAGCTACAGAACTTCCATGCTTTCCACGCTGGCCAAAAGATCTCGAAAATGCGTTTACAGATGAAGAATCGAATGAAGAAACATCATCGGTCGGAAGGATGGCTAGAACAATCCGTAAACGTCCTCCGGAGCAGTCGCAACCCTCCCGGTCATCCAGCTGCACTGGAAGGGGAGAATACGATGATGATGAAGAAGAAATAGACACCGCAGATGAGTCTCGTCAAGTTACAGAAGAGCAGCTTCTTTTAAGCCATAGATCTCGCTCTGTTTTTGGAGGATCTGA…
LF	KH.C10.27	KH2013:KH.C10.27	KH.C10.27	Cirobu.g00001478	4.22068	1.60081	0.000242688	-1.4769	0.00129129	6	https://www.aniseed.cnrs.fr/aniseed/gene/show_expression?unique_id=Cirobu.g00001478	https://www.aniseed.cnrs.fr/aniseed/gene/show_gene?unique_id=Cirobu.g00001478	http://ghost.zool.kyoto-u.ac.jp/cgi-bin/fordetailkh21.cgi?name=KH.C10.27;source=kh2013	BTNs	RT-PCR	824	TTGGCTGCGATTGTAGTCTGTTATTTCGGCTGCATAGCTGATGCGGTGCCGGTTGACACTGTGGAAAAACAACTTCTACAGAGAGAGGGTACCGGGAATCCTGAGAATTTCTTGGACTGGACGAATCAATTAAACTCCACAGATGATGCAGAAGATAATCCTTTCCTGGCAGAAAATCGAAACAGCGACGAAGAAAACAACGATTACAGTCCCGGACAAGCTGAGTCTATCCAGTCGGATAAACGCTTCCAGTCTTTGTTTAAGCGTTACCCTGGTTTTCAAGGACTTTTTAAGCGCCATAACCCCCATCTTCCAGACTTGTTTAAGCGCTATAACAGCATGGGCTTATTTAAGAGAAGCCCCGGAATGCTAGGGCTTTTCAAACGGGGTCTGCTAGGC…
Ltbp4	KH.C1.54	KH2013:KH.C1.54_CG7381	LTBP4; NOTCH1; NOTCH2	Cirobu.g00000788	6.29208	3.20624	8.29e-05	-1.27717	0.0947503	0	https://www.aniseed.cnrs.fr/aniseed/gene/show_expression?unique_id=Cirobu.g00000788	https://www.aniseed.cnrs.fr/aniseed/gene/show_gene?unique_id=Cirobu.g00000788	http://ghost.zool.kyoto-u.ac.jp/cgi-bin/fordetailkh21.cgi?name=KH.C1.54;source=kh2013	BTNs	Twist BioScience	500	GGCTGCGTAAGAAAAATACGAACAAAGATGGGAAAAGTTTCGTGGATTCCTTCAAAGAATGGATTTTTTAACAGCCACAAAGGCTGTACAGAAACTGTACAACCAGGAACTTTATTTTATGGGACTGGATTCTTACAGTTAGATCCGTCTCAAATGCGGCGCGTGCCAGATTTTAAATTTCGAGCGGTGGTCAGGACAAGTTATCCCGATGGTGTTTTGGTTTCGGCAAGAACGAACGGCGGGGGGAAGTTAGTTTTATCTCTTAGTGACGGAACTATTCGGGCAGAGGTTACGGACATCTCCGGCATCCGCACACATTCATCTATATATAGAAAGGAGGGGCAATTGATGTGCACCGGTTTGTGGATGAGCATTTACTGTAAAATTTCCACCCGCGGA…
Mab21-like	KH.C2.402	MAB21L1/2	MAB21L1; MAB21L2; MAB21L3	Cirobu.g00004597	4.68995	2.07237	0.000218254	-1.64447	0.00365023	0	https://www.aniseed.cnrs.fr/aniseed/gene/show_expression?unique_id=Cirobu.g00004597	https://www.aniseed.cnrs.fr/aniseed/gene/show_gene?unique_id=Cirobu.g00004597	http://ghost.zool.kyoto-u.ac.jp/cgi-bin/fordetailkh21.cgi?name=KH.C2.402;source=kh2013	BTNs	RT-PCR	1016	CTGGGTGTGCTGTGCTAAAACTTAGCGATGGGCGGAAACGTAGCATGTCGCTATGGGTGGAATTCATCACCGCTTCAGGGTACTTGTCGGCCAGGAAAGTTCGCTCCAGGTTTCAGACGCTTGTGGCGCAAGCCATCGAGAAGTCACATTACAGGGATCTTGTGAAGCTGGCGCAAGATACAACTGAAGTTCGGATGATCATGAGAGACAATATATCGGTTCGAGTCACACCAGCATTCAAGTGTGGCGGCATATGGCCACGAAGTGCGGCGCATTGGCCCGAACCTCGCTCTACCTGGCCCAGCCCAAGCAGGGTGGCCGAAGTGAAAGCGGAAGGGTTTAATCTATTATCTAAAGACACTCCGACCGGAACGGGCAAAAACAGCACTGCGGAGAGCG…
Myh-tun3 (MHC3)	KH.C3.774	MYO-1/2/3/5	MYH2; MYH6; MYH7	Cirobu.g00005979	4.81834	2.69868	0.00167456	-2.14891	0.0108801	1	https://www.aniseed.cnrs.fr/aniseed/gene/show_expression?unique_id=Cirobu.g00005979	https://www.aniseed.cnrs.fr/aniseed/gene/show_gene?unique_id=Cirobu.g00005979	http://ghost.zool.kyoto-u.ac.jp/cgi-bin/fordetailkh21.cgi?name=KH.C3.774;source=kh2013	BTNs	RT-PCR	726	GGTCGAGAACCTGAGTCGAGTGAAAAACAAGATCGAGAAGGATCGCGCTCAGCTTCACATGGAGCTTGATGACGTCACCACTCAGTTGGAAGAAGTTTCCAAACTCAAGGCCAACGTACGTGTCATGGAGGAACAGGTGACCGACTACAAGTTCAAGGTGGAAGAAAATATCCGCATTGTAAACGAGTTGACGATCATCAAGAACAAGTTGACAAGTGAATCAATGGAGTCTTCTCACCAACTTGAAGAAGCGGAAAGCAAGGTCAGCGCTCTTTCCCGCGCAAAATCCAACATGACGTCAATGCTTGAAGATCTCAAACGTCAGTTGGAGGAAGAATCAAAGAGCAAGCAATCTTTGGCACACGCCCTGCAAGCTGCACGTCACGATCTTGATCTGTT…
Ncs	KH.C1.1067	FRQ1/2	HPCA; HPCAL1; NCS1	Cirobu.g00000077	6.15737	3.07621	0.000115681	-2.66791	0.000751167	0	https://www.aniseed.cnrs.fr/aniseed/gene/show_expression?unique_id=Cirobu.g00000077	https://www.aniseed.cnrs.fr/aniseed/gene/show_gene?unique_id=Cirobu.g00000077	http://ghost.zool.kyoto-u.ac.jp/cgi-bin/fordetailkh21.cgi?name=KH.C1.1067;source=kh2013	BTNs	Twist BioScience	500	AAGGAGGAATTTCAAAAGGTTTACCAGCAGTTCTTTCCCAAAGGAAATCCGTCAAAATTTGCAAATTTCGTTTTTAACGTTTTCGACTCTGACAAGGACGGCTTCATTACGTTCAAAGAATTTATTTCTGCCCTTTCCGTGACGTCACGAGGAAACCTGGACGAAAAGTTAGATTGGGCTTTCAATCTTTACGATCTTGATCATGACGGTTTTATTACAAGAGAAGAGATGTTAAACATAGTAGATGCCATCTACTCCATGGTGGGAAACGCTATGGACTTGCCGGAGGATGAGAACACACCTGAGAAGAGGGTTAACAAAATATTCTGTCAGATGGACCAGAACAAGGATGGCAAATTGACGAAAGATGAATTCCGAGAAGGCTCGAAATGCGATCCC…
Pde11-related	KH.L18.65	PDE2	PDE11A; PDE6B; PDE6C	Cirobu.g00012005	7.20546	3.05012	3.7e-09	-0.0782625	0.869962	3	https://www.aniseed.cnrs.fr/aniseed/gene/show_expression?unique_id=Cirobu.g00012005	https://www.aniseed.cnrs.fr/aniseed/gene/show_gene?unique_id=Cirobu.g00012005	http://ghost.zool.kyoto-u.ac.jp/cgi-bin/fordetailkh21.cgi?name=KH.L18.65;source=kh2013	BTNs	Twist BioScience	500	TAAGACAAGAGACTATGTTGCGGTGGCTGATTACCACCAGACGTTGTTACAGACCGGTTTATTATCATAACTGGAGACACGGTCTGAATGTTGCCCACACAATGTTTCTACTGTTGGACCGCATGGGAAAAGATACAAATACGCCGGGTATCGACAAAGCTTTTAACGATCGAGAAAAGTTCGCGTTGGTGGTCGCATGTTTCTGTCACGATATTGATCACAGGGGAACTAACAACGCATTTCTTATCAGGGCTGGAGCACCTCTTGCCATTTTGTACAACACGTCCACCCTGGAGAATCATCACTACGACACATGTCTCAGAATAAGCAGCATAGACGGAAACAACATTTTCGAATCGTTTACCAAAGAGCAATTCGAATCGGCATGCGAACTGATGA…
Plch	KH.C1.1005	PLCH1/2	PLCH1; PLCH2	Cirobu.g00000009	4.20554	1.10825	0.0460139	-1.17876	0.035068	0	https://www.aniseed.cnrs.fr/aniseed/gene/show_expression?unique_id=Cirobu.g00000009	https://www.aniseed.cnrs.fr/aniseed/gene/show_gene?unique_id=Cirobu.g00000009	http://ghost.zool.kyoto-u.ac.jp/cgi-bin/fordetailkh21.cgi?name=KH.C1.1005;source=kh2013	BTNs	RT-PCR	1001	GCGATTACTTCAACGCCAATAGACCTGGAAAAGAAACGAAGCCCTCAGAAAAACCGAAACAAGAACAACAACAGCAATTCTAAGAGGAATGCCTCACGAAAACTGATGGATGAGGAACTTAACCTGGAGTTAAAGACCTCGAACAAGATTCAGTCGTTGCAAAACCACCGCGACGAACCGAATCCTTCCAGTGCTGGCATTTACACCACATTGAGGAACCAAGAACCCAGCGGAACGAAAGACGAACAGTCGGGTTGTTCAACTAAGCAAACAAGTGTTGAAGGTATGGGGTCTGAGTGCCAGCAGTTCAGACGGAGTCGTAGTTTCTCTGGAAAACAAATCGCAGCTCGAAGAAATGGTAGCGAGGGTGGGAAAAGGTCTGCGTTAAGTGTTTTCAAT…
Rab12	KH.C1.515	RAB12	RAB10; RAB12; RAB8A	Cirobu.g00000762	4.47402	3.17574	0.0108986	-2.12924	0.0781037	0	https://www.aniseed.cnrs.fr/aniseed/gene/show_expression?unique_id=Cirobu.g00000762	https://www.aniseed.cnrs.fr/aniseed/gene/show_gene?unique_id=Cirobu.g00000762	http://ghost.zool.kyoto-u.ac.jp/cgi-bin/fordetailkh21.cgi?name=KH.C1.515;source=kh2013	BTNs	Twist BioScience	500	ACAAACCCAGAATCATACCGCAACATTACAAAGTGGATGAAACTTATTGAGGAGTACGGCAGGAGTGACGTGGAAGTGGCGATCGTTGGAAACAAAGCGGATCTGGAGAACGTACAAGTCAACACACACAAAGCTAGAAACTTTGCCGAAAACTGCGGCTTCATTTTCTACGAAACAAGCGCCAAAGCAAGTTTAAACGTGGACACAGTGTTTGTTAATCTAATATACAAAATTCTTAAACAGATACCTCAGCCTCACGAACGAAATCCACAAATCCGACGAAAAACAATGACGTCACAGGCATTATGCGAGGACGCGAACGCGAAGCGAAGTTACAAATGTTGCTGACGTCATAATAGAAAGATCCAAAAGCTCAATGGATGAATCGAAACTGCATTG…
Rbpms	KH.L71.1	RBPMS/2	RBPMS; RBPMS2; SNRPB2	Cirobu.g00013008	4.35882	0.989054	0.148593	-1.79448	0.010452	0	https://www.aniseed.cnrs.fr/aniseed/gene/show_expression?unique_id=Cirobu.g00013008	https://www.aniseed.cnrs.fr/aniseed/gene/show_gene?unique_id=Cirobu.g00013008	http://ghost.zool.kyoto-u.ac.jp/cgi-bin/fordetailkh21.cgi?name=KH.L71.1;source=kh2013	BTNs	RT-PCR	1004	TTCGTGGATTCACGGGTTATGAGGGGTCCATCATCAGAACTACAGCGAAACCTGGAAAGGCGCCTGTGCCGGTCGGGTTCGTAACCTTTGACTCCCGTGGTGAAGCAGATTTAGCGAAGAATTCACTTCAGGGCATTAAGTTTGATCCAGAGCTACCTCATACACTAAGACTTGAATTCGCAAAAGCCAACACGAAAGTCAAACTACGGCCATCATCCCCCGCTCAGGAACTCGCCAACCACATTATAGGATACCTACCACAACAGTTCGGTTCTGCAAACCTCCTGCCTGCTGAGATCTTCGGGCAACCATACTCCTCCTACCCGGAGCTTCTGCAAGGATTTCAAACTCATCCGTCCGTAACACAAGTGGGCGCCCCATTACAGGTGACCCCTGCAC…
Saxo	KH.C10.475	KH2013:KH.C10.475_FAM154B	SAXO1; SAXO2	Cirobu.g00001698	4.33908	1.99	0.175665	-2.40718	0.108083	0	https://www.aniseed.cnrs.fr/aniseed/gene/show_expression?unique_id=Cirobu.g00001698	https://www.aniseed.cnrs.fr/aniseed/gene/show_gene?unique_id=Cirobu.g00001698	http://ghost.zool.kyoto-u.ac.jp/cgi-bin/fordetailkh21.cgi?name=KH.C10.475;source=kh2013	BTNs	Twist BioScience	500	GAGTTACGTCCCGAAATCCATGCGCGAAGTCGAGCGCTACCCAACACCGGATTGGCTGAAACAACAAGAAGATATTTGGAGGAAGACTGGCATGATGACACAAAAGACCAGAGGGATGACCCCCGAAGCTACCGCTGCGTATATTCGAGCTGCAGCATAATAATACTTCTTTTCCACTTTTTCTCAAAAAGAATTTTTGAGATATTTACAATCTTTATTTACGCTATAGGTTTAGACGTGCGCAGGATTGTTTATAGTTAGGCAAGTTTGTTTTCGAAAATCGCTCATCCCATTCTGGGTCGTCAAGCAAAATGCAGTACAGCCTCAAATGAGTGGCGTTTCACAACACTGTTACTGACCAACGTTATAATGTGATGGGCTTAATAATCGTCGCTTGGG…
Scgn	KH.C3.178	SCGN	CALB2; SCGN	Cirobu.g00005336	4.0699	2.39059	0.000571497	-1.30987	0.0558523	0	https://www.aniseed.cnrs.fr/aniseed/gene/show_expression?unique_id=Cirobu.g00005336	https://www.aniseed.cnrs.fr/aniseed/gene/show_gene?unique_id=Cirobu.g00005336	http://ghost.zool.kyoto-u.ac.jp/cgi-bin/fordetailkh21.cgi?name=KH.C3.178;source=kh2013	BTNs	Twist BioScience	500	ATGGTGGATGCAATAGACGGAAGTTTAGGTTTGAACAAGATAACAGCTACAGAATTCGCAAAGCTTTGGAAAAGTTTCGATATAAACCAAAGTGGTTACATGGAAGGCAACGAACTCAATTCTTTTTTCTATGATCTTGCCAAGGATTTACTTAAGAAGGAGCCTAGTGAAGATGAGCACAATAGTGTAAAAACTCTCTTTATGGCAGTATACGATAAGGCAAAGGACGGTAGAATATCGATGAATGAGCTTGCAAAAATGCTGTTACCTGAAGATGAAGAATTCCTTTTGTTTTTCCGACGGCGAATTCCATTGAATTCAAGCGTCACATTTATGCAGATTTGGAGGCGATATGACAAAAACCGTAGTGGGTTCCTAAACAAAGCTGAACTTCGGAAT…
Sema6	KH.C4.719	SEMA-1A	SEMA6A; SEMA6B; SEMA6D	Cirobu.g00006836	7.62728	2.63501	0.000101654	-1.64068	0.0124007	0	https://www.aniseed.cnrs.fr/aniseed/gene/show_expression?unique_id=Cirobu.g00006836	https://www.aniseed.cnrs.fr/aniseed/gene/show_gene?unique_id=Cirobu.g00006836	http://ghost.zool.kyoto-u.ac.jp/cgi-bin/fordetailkh21.cgi?name=KH.C4.719;source=kh2013	BTNs	Gene Collection		citb029m10, PlateID R1CiGC31d07
Sipa1l	KH.C3.463	SIPA1L1/2/3	SIPA1L1; SIPA1L2; SIPA1L3	Cirobu.g00005646	4.74573	0.714535	0.0911425	-0.894661	0.0367543	0	https://www.aniseed.cnrs.fr/aniseed/gene/show_expression?unique_id=Cirobu.g00005646	https://www.aniseed.cnrs.fr/aniseed/gene/show_gene?unique_id=Cirobu.g00005646	http://ghost.zool.kyoto-u.ac.jp/cgi-bin/fordetailkh21.cgi?name=KH.C3.463;source=kh2013	BTNs	RT-PCR	665	ACGTCACATTGGAAACGACATCGTTACCATCATATTCCAAGAACCCGGTTCGCAACCCTTCAATCCAAAGTTTATTCGATCACATTTCCAACATGTATTCATCATTGTTCGTGTATATCAACCATGTACCAAAGACACTTGTTACAGGATCGCAGTAACAAGAGCAAGGAACATTCCACGATTTGGACCTCCCATTCCTGAAGATTCAATGTTTCCCAATACATCAACATTTAGGGAGTTTCTCCTTACTAAGTTAATCAATGGAGAGAACACGGCTCATTCAGCTGGAAAGTTTAAGTCATTGGCAATGAATACACGTCAAGAATATTTACGTGATCTTGCCACCACTAATCTTACACAAAGTGGATTAGAAGTAAATCCAAAGTTCTCATTTTTTGC…
Slc24a	KH.L50.5	SLC24A1/2	SLC24A2; SLC24A3; SLC24A4	Cirobu.g00012742	7.1086	1.99868	0.000956234	-1.33296	0.0250189	0	https://www.aniseed.cnrs.fr/aniseed/gene/show_expression?unique_id=Cirobu.g00012742	https://www.aniseed.cnrs.fr/aniseed/gene/show_gene?unique_id=Cirobu.g00012742	http://ghost.zool.kyoto-u.ac.jp/cgi-bin/fordetailkh21.cgi?name=KH.L50.5;source=kh2013	BTNs	RT-PCR	1007	CCAACCAGAGGAGCAAAAAGATAAAGTTACTTTTAGCTACGGCATCGTCCAACTTATGATGCATACGTTAGACCCAGTTACAGATGAACCAAGCAAAGAACGATCATCTCGACTTTACGCGATGGCGAGAATGAAACTTATCAGTCCAAGGATGGCTCGCACATTGAATAAAAGAGGAAGCACTGATCGTGATGTCATAAACAGGTACAACCAGAAAGCAAACGCCAACAGCAGCGACAAAGTTGAAGTGAAATCCACAGCGGTTATTTACGAAAACCAGGTGGTTCGTGTGGTCCCGAAACCGAACGAAACATCCCCGGAAGGCGTAGCAACGAACAATGAAGTCCCGCTTACAACAATAGGGGAGGAAGATGAGACACAAAACAACCATCCAAGCAA…
Slc30a2	KH.C7.109	SLC30A2/8	SLC30A2; SLC30A3; SLC30A8	Cirobu.g00007927	7.43715	1.61031	0.0140752	-0.7368	0.252739	4	https://www.aniseed.cnrs.fr/aniseed/gene/show_expression?unique_id=Cirobu.g00007927	https://www.aniseed.cnrs.fr/aniseed/gene/show_gene?unique_id=Cirobu.g00007927	http://ghost.zool.kyoto-u.ac.jp/cgi-bin/fordetailkh21.cgi?name=KH.C7.109;source=kh2013	BTNs	Twist BioScience	500	ACGAAGATCACGGTTCTGTCGGTTCGTCCGCACCCTCTGAGGTAGAGTCAGATCATTGTCACGATTCGTCGGACGAGAAGACCCAGCGAGAGAACAAAAAAAGGAAAAAGGCAATGCGAAAGTTGCTTATTGCTACTGGTCTCAGCTTTTTGTTCATGGTCGGAGAAATTGTGGGCGGCTTTCTCGCGAACAGTCTTGCTATAATGACTGACGCCAGTCATCTCTTGACAGACGTCAGTAGCTTTTTAATCAGCATCATAGCACTGAAAATGGCCGCCCGGCCGATATCGAAGAAAATGACATTCGGGTGGCATAGAGCGGAGGTTATTGGCGCGCTGATCAGTGTTCTTGCAATATGGATTGTCACTGGCGTTCTTGTGTATCTGGCCGTAATGCGAT…
Slc7a14	KH.C7.173	SLC7A14	SLC7A1; SLC7A14; SLC7A2	Cirobu.g00007996	5.49868	2.65381	0.00220407	-1.38861	0.0961917	0	https://www.aniseed.cnrs.fr/aniseed/gene/show_expression?unique_id=Cirobu.g00007996	https://www.aniseed.cnrs.fr/aniseed/gene/show_gene?unique_id=Cirobu.g00007996	http://ghost.zool.kyoto-u.ac.jp/cgi-bin/fordetailkh21.cgi?name=KH.C7.173;source=kh2013	BTNs	Twist BioScience	500	AATTGCTTTCAACCAAGTTCATGGAGATGGAATTCCTTCAAAGAATCTTCGCATCGCATGGCAGCGCGATTAACAAGAAAGCGGCCGATCGAAGCCATGCGTGACGAAAGAAGGAAATCTGTGACGTCAACAAAGCTTCCGAAATGTTTGACGACATTGGATCTGACGTCATTGGGCGTGGGAAGTTGTGGTGGCACAGGAATGTATGTGGTGTCGGGTATGGTGGCGAGGGAGATTGCTGGTCCAGGTGTCATCTTCTCTTTTATCATCGCTGGACTCGTGTCTTTGTTATCAGGAATGTGTTACGCTGAGTTCGGGGTACGAGTTCCTAAGACGTCAGGATCAGCTTATACGTATAGTTACGTCACAATCGGGGAATTTACGGCGTTTTTCATTGGT…
Sord	KH.L105.1	SOR1/2	ADH1A; ADH5; SORD	Cirobu.g00010565	4.60215	4.7334	1.25e-16	-0.183211	0.780376	0	https://www.aniseed.cnrs.fr/aniseed/gene/show_expression?unique_id=Cirobu.g00010565	https://www.aniseed.cnrs.fr/aniseed/gene/show_gene?unique_id=Cirobu.g00010565	http://ghost.zool.kyoto-u.ac.jp/cgi-bin/fordetailkh21.cgi?name=KH.L105.1;source=kh2013	BTNs	Twist BioScience	500	CGCTTAGTGTTGCAGTACACACGTGTCGTAGGGCATGTGTTACATCCGGACATCATGTCCTTATATTTGGCTGTGGGCCTATCGGTATCCTGTGTGGTTTGGTAGCGAAGCATTACGGGGCAACGCAAGTTACAATAGTAGATATTGACCAAGATCGCCTAGAAGTTGCAAAGAAACTCGGGGCAGCAGATGTTGTCCACAAAGCTACGACAACTGATAACGATCCTGTTACTTTTGCGCATACATTAAGAGAAGTTGCAAACGATGATGGTTCCCATGCAGCATTAGAGTGTAGCGGTGCTGATATTAGTCTTAAAACTGCAGTACATGCCTCACGACCGGGCGGGTGTGTCCTGCTTGTCGGCAGAGGATCGATGGACGTACCGATGCCAATGGTAG…
Srrm	KH.C1.118	SRRM4	SRRM4	Cirobu.g00000200	6.03252	2.08998	6.3e-05	-1.05417	0.0389239	5	https://www.aniseed.cnrs.fr/aniseed/gene/show_expression?unique_id=Cirobu.g00000200	https://www.aniseed.cnrs.fr/aniseed/gene/show_gene?unique_id=Cirobu.g00000200	http://ghost.zool.kyoto-u.ac.jp/cgi-bin/fordetailkh21.cgi?name=KH.C1.118;source=kh2013	BTNs	RT-PCR	995	CCTGTTTCGAAATGCTGTCACAAGTGTAAAAGACGAAGATTGGCAAAACGGGAGAAACGTCTTGAACGACTACAGAGAAGACCTCGCTCTCGCAGAAGTTCCATTGAAAGTGACGAATCATTCAAATCACGAACACGAACTCGTTCACGATCACGGTCCAGCTCATGGGATAGGTTCCGAGGATCACGGAGTCCTTCGATCCCGATAGATCCACATAGAACTTCACCTTCTCATCTAGAGGTTCGGCGAATTACAAGCGCAAGAAAACTGCCGGTTCCTTACAACAGGAGATGGGACTCAAGCGATTCAGATTCGGATTCGTCAATCTACGATAAAAGGCCGAACATATTCCGACAAAATATGAAGCGAACAACAACGTGTTTCATGTGAAACTTTTTA…
Sstr2/5	KH.C11.495	KH2013:KH.C11.495_RXFP3	RXFP3; SSTR2	Cirobu.g00002331	5.29026	2.2963	0.00106707	-0.412131	0.544427	6	https://www.aniseed.cnrs.fr/aniseed/gene/show_expression?unique_id=Cirobu.g00002331	https://www.aniseed.cnrs.fr/aniseed/gene/show_gene?unique_id=Cirobu.g00002331	http://ghost.zool.kyoto-u.ac.jp/cgi-bin/fordetailkh21.cgi?name=KH.C11.495;source=kh2013	BTNs	Twist BioScience	500	TACCAAGTGGATAAAAATGGGTACGATTCAGTTTATTGGAGCCATGATCGGTTTTATCGTGCCAATGATTGTGATTTCTATTTGTTATGCTCGAATTGTGGTCACAGTGAAAAAGAAGGTTATCAGCAAAAAAGTTCGCAAAGATCGAGTGGCGAAACTTGCAGCACTTGTTGTGCTTGCCTTCTTTTTCTGTTGGTTGCCGATGCAAATAATGCAACTGTTTTCCGCTCTTGGAGGCTGGTGGAAAATCAAGGCTTTTAATTTTGACAAAAATTTGTTCCATGCTGTGTATCCCTTCATGATCGCCCTTGCATATTCAAACAGCTGCATCAACCCGATAGTTTACGCTTTCACCACCACGAACTTCCAAGAAAACATTAAGGATATATGCGGATCAGA…
Syt7-related	KH.C4.304	C2CD4C	SYT11; SYT4; SYT7	Cirobu.g00006384	4.31213	2.28101	2.85e-06	-1.22594	0.0131562	0	https://www.aniseed.cnrs.fr/aniseed/gene/show_expression?unique_id=Cirobu.g00006384	https://www.aniseed.cnrs.fr/aniseed/gene/show_gene?unique_id=Cirobu.g00006384	http://ghost.zool.kyoto-u.ac.jp/cgi-bin/fordetailkh21.cgi?name=KH.C4.304;source=kh2013	BTNs	RT-PCR	1000	TGGCAGAACCACATTGGATACTGACAGTTCTTCGGCGCAATCTACACCGTTTGCATCACCTGCCCAGCATCGTAAACTCTCGGCGAAACAACACAGCGAGCCGACAGGACGCTGCGGCGGCGCTGGCGGCATTGCTGATGCGATGAAAAATGGGAACCGAAATAAACAAGAGACTTCCAGTCAGCCGAAGGCGAAAAACAGCCAGGAAACGCAATGCGTCGGTAACACGGTGAAACGAAGCCACAGCGCATCGAGTATTCTCACAAATTCGACAGCTCGTGACTCCTCGTGCAAACAGAGCGACCCTGAAAGTAACCCACGAATACACGTCATCGTGACGTATCTACCCTCTCAAGAAAAGCTGAACGTATCGATTCTGGAAGGCGAAAATTTCGACGA…
Zf-S1497	KH.S1497.1	KH2013:KH.S1497.1_RTL1	NYNRIN; RTL1	Cirobu.g00013916	3.54892	1.59575	0.00810188	-1.66866	0.00813905	0	https://www.aniseed.cnrs.fr/aniseed/gene/show_expression?unique_id=Cirobu.g00013916	https://www.aniseed.cnrs.fr/aniseed/gene/show_gene?unique_id=Cirobu.g00013916	http://ghost.zool.kyoto-u.ac.jp/cgi-bin/fordetailkh21.cgi?name=KH.S1497.1;source=kh2013	BTNs	RT-PCR	1002	CAAAATGTGTTGTCGGAACGGACAATCTCGACTTTCTAGGGCATCATCTAGTTGACGGGGTGGTTGGACTACAAAGGGACAACGTGACAAAGGTTGAGAATGCTTCCCGGCCAACTACTCAAAAGGAAGTCCGAGCTTTTCTTGGACTGACCGGATACTACAGAGATTTTATCCCAAATTATGCGACCATCGCTACACCACTGACCGACTTGACAAAAAAAGGTCAACCAAGTTCCATCACATGGGATGACGCCCATGAGCAAGCATTCACTACTCTTAAACGGCATTTGACAAATTACCCCATACTACAGCTACCTGATGTATCAAAACCATTTGTGCTGCGGACGGATGCGTCAAACGAGGGCATCGGAGCTATGCTTGGTCAGATTCACGACGGAC…
Abhd11	KH.C10.347	ABHD11	ABHD11; BPHL; EPHX4	Cirobu.g00001560	4.37955	0.72733	0.0569264	-0.764022	0.0498972	0	https://www.aniseed.cnrs.fr/aniseed/gene/show_expression?unique_id=Cirobu.g00001560	https://www.aniseed.cnrs.fr/aniseed/gene/show_gene?unique_id=Cirobu.g00001560	http://ghost.zool.kyoto-u.ac.jp/cgi-bin/fordetailkh21.cgi?name=KH.C10.347;source=kh2013	Negative	RT-PCR	997	TGATTCATCTCCTGGTGCAATAAATGGCTCAAACTTCACTGAAAGAGGTTCAATCTTATCGTATGTTGAAGCAATGCAGAATGTGAACTGGGATTCTGCCAATACTTTGTCACGTGCGCGTAATACTGCAGACGAACAACTTACTAATGCCGTTCCTAATCTGTCAGTACGTCAGTTCATTCTCACCAACGTAGAAGAATCTTCACCTTCCAATTACAAATGGCGAGTCAACCTTGATGCAATACAACGACATCTGCAATGCACACACCAGATTTTTGATAAAAACAACAGCAAAACATTTGACGGAAAAACTTTGTTTCTTGGAGGAGGGCTATCCAATTATATCAGATATGAAGATTACCCCAATATAAGAAGATTATTTCCCAACTGTAACATAAC…
AdhGPCR	KH.C4.749	KH2013:KH.C4.749_LPHN1/2/3	ADGRE2; ADGRE5; ADGRL4	Cirobu.g00006869	1.59652	0.537574	0.635877	-2.6772	0.0279871	0	https://www.aniseed.cnrs.fr/aniseed/gene/show_expression?unique_id=Cirobu.g00006869	https://www.aniseed.cnrs.fr/aniseed/gene/show_gene?unique_id=Cirobu.g00006869	http://ghost.zool.kyoto-u.ac.jp/cgi-bin/fordetailkh21.cgi?name=KH.C4.749;source=kh2013	Negative	RT-PCR	997	CGAATGCTGCATGTACCAACACAAGTGGTAATTTCAAATGTACATGCGATTTTGGTTTTTCTGGTGATGGATATAAAATTTGTAAAGATAAAAATGAATGTGGGAAGAAGTCTTGTCCAAGAGGAAAGTATTGCAGGAAAGAAACAGATAAATATAAATGCCATAATATCAACTTTATAGTTGATGGATCTTCTTTAAGTTCTCCTCAGGTGGTTGAAAATACCTTGAACAATATAAAGGAAATGACAAAGAAACCTGCACATTTGACCAAAGAAAATGTAAAGTCTCTTGGAGATTTCATGAAAAATTTAAGAAAGAACGTTGCAAAAAATGGCATAAGGGTATCCAGAAAGACACTTGATTCAGTCATACAGATAACAACTGATGTGTCGGTTGCAT…
Aoah	KH.L141.22	AOAH	AOAH; PSAP; PSAPL1	Cirobu.g00011175	1.99831	3.58902	0.00484967	-0.494155	0.671386	0	https://www.aniseed.cnrs.fr/aniseed/gene/show_expression?unique_id=Cirobu.g00011175	https://www.aniseed.cnrs.fr/aniseed/gene/show_gene?unique_id=Cirobu.g00011175	http://ghost.zool.kyoto-u.ac.jp/cgi-bin/fordetailkh21.cgi?name=KH.L141.22;source=kh2013	Negative	Twist BioScience	500	CTATTCATTGTACTGGCACTAGTTGGAAATGACGTTTGCAATGGACACCCAGATACAATCGATCACATGACCACACCCGAAGATTACCGAAGCAACATGATGACCACTTTACGCTATTTGGACAACAATATTCCTAAAGGCAGCAACGTTATGCTTGTTGGTTTGGCGGACGGCCGTGTATTGTGGGATACTTTACACGACAGAATGCATCCAATCGGTCAATTAAATAAGGATGTGTCGTACAAGAACTTATACGATTATTTAAACTGTTTGGAAGTATCGCCTTGTACTGGTTGGATGAACAGCAACGAAACATTGCGCAACTTAACTTCACAGAGAGCGCATAACTTAAGTATTCAAGCAAAGAACATCGTGGACACCGAACATTTCCAAAACTTT…
Bok	KH.L87.39	BOK	BAX; BCL2; BOK	Cirobu.g00013200	3.27854	2.64835	7.75e-05	-1.64173	0.0148213	0	https://www.aniseed.cnrs.fr/aniseed/gene/show_expression?unique_id=Cirobu.g00013200	https://www.aniseed.cnrs.fr/aniseed/gene/show_gene?unique_id=Cirobu.g00013200	http://ghost.zool.kyoto-u.ac.jp/cgi-bin/fordetailkh21.cgi?name=KH.L87.39;source=kh2013	Negative	RT-PCR	1002	AGGTAGCGGTTTTGAGCGTATGTTTCCGAAGAGTTTTCGGCAGATTTCGCGACAAATCGGATACGTGTTCAGTTCAGAGGCGACCGTACGAAGATTGTATTTCAGAATGGGCGTTCATATTATGGGAGTTGTCGAATGCAATTATACATGGGGAAGAATTTTGTCGCTTCTGGGGCTTGCTGGTGCTATGGCTGTTGACTGCATATCTCAAGGACACCCAGAACTCGCTGAATCGATGATTGGAATCTCGAGTGATTTTATTCAAAGAAATGCTCTTGATTGGATTATAAAGCATGGTGGTTGGGGTGGCTTGGTCGATAACTTTTCCCCGAAACCTATGAAATCGTATTGGTCAACACGGAATATTTTGAAATGGAATGGAGGTGTCACTCTCGCTGT…
Dpysl	KH.C2.307	DPYSL2/3	CRMP1; DPYSL2; DPYSL3	Cirobu.g00004493	4.119	3.10279	1.34e-08	-0.332618	0.557557	0	https://www.aniseed.cnrs.fr/aniseed/gene/show_expression?unique_id=Cirobu.g00004493	https://www.aniseed.cnrs.fr/aniseed/gene/show_gene?unique_id=Cirobu.g00004493	http://ghost.zool.kyoto-u.ac.jp/cgi-bin/fordetailkh21.cgi?name=KH.C2.307;source=kh2013	Negative	Twist BioScience	500	CTGCGCGGTTCCTTAATCTGTATCCTCGTAAAGGCAGAATTGCAGTTGGATCTGATGCCGACCTGGTGGTGTGGAAAGTTAACGAAGCTCTCTCATTGGCTGAAACTGCTTCTGAGTTCGCTGTAACAAAACCAGACTGCACCAGTGCGTTCGAAGGTGTTGAAAGTAAAGGGCGCCCTTCAGTGGTTGTGGCACATGGAAAAGTTGTCTACAATGACGGACAGATTAGCGTGGTTCAATCCATGGGAGATATGGTTGAACGACCAGTTTGTTCGCCTTCAATTTACAACCGTTTAACAACCAAAGATGCACTTCACAAAACTCGCACTGCACCAACTCCGGACTCAGCACTTTTTCGTGGCATCAATGGAATTGTCACTGACAACACAGGAGCTAACA…
Galanin	KH.S618.6	GALA_CHICK	KH.S618.6	Cirobu.g00014834	2.78668	4.85196	2.31e-05	-1.5915	0.184071	5	https://www.aniseed.cnrs.fr/aniseed/gene/show_expression?unique_id=Cirobu.g00014834	https://www.aniseed.cnrs.fr/aniseed/gene/show_gene?unique_id=Cirobu.g00014834	http://ghost.zool.kyoto-u.ac.jp/cgi-bin/fordetailkh21.cgi?name=KH.S618.6;source=kh2013	Negative	Twist BioScience	500	ATGAGCCATCTCCCAGGTCGGTTATATAAACCGCGTATTTTCAATATTTGGCACACCAACCTAAGAAACGATCACTATCGAACTAAGAAGCCGGTTTGCAACCTTAACAGATCAAGAAAAATGAACAGTTTCGGAAGATATACTTTCAGCCTCGCTGTTGTCCTTTATATTAGCATTGTTCTGTGCGCTGAGAACTCTGAGGCGGCTACCGCGAAACGCCCGTTTCGTGGGCAGGGAGGATGGACACTTAACAGCGTTGGATACAACGCAGGACTAGGAGCGCTGCGAAAACTGTTCGAAAAGAGGGACGGTTCTTCTCTAGATGTTGAATCAATGCCACTTGACAACGAAGAAATGGAAAACCTTGCTAAAGATTTTGCCTTGTTTCTCGAAGTAAAA…
Glycine receptor	KH.L83.7	GLRA1/2/3/4	GLRA1; GLRA2; GLRA3	Cirobu.g00013133	3.66381	1.98372	0.0214757	-1.76321	0.0410744	0	https://www.aniseed.cnrs.fr/aniseed/gene/show_expression?unique_id=Cirobu.g00013133	https://www.aniseed.cnrs.fr/aniseed/gene/show_gene?unique_id=Cirobu.g00013133	http://ghost.zool.kyoto-u.ac.jp/cgi-bin/fordetailkh21.cgi?name=KH.L83.7;source=kh2013	Negative	RT-PCR	1002	CCGAATCCACTGAGGAAAAGAAAGCGACATATTTCCTTGATAATTTATTTAATGGGTATGACCAAAGGATACGACCTCATCATAAAAGGTCCCCGGTCAACGTTACAGTGAATATCTTCGTGAATAGCTTTGGTTCTATTGCTGAAACTACAATGGACTACCGTGTAAACATTTTCCTTCGATGCCGATGGAACGATCAACGCATGGCGTTCACTGGGTTCGATGAAGATGCGGTTGCTCTTCATCCATCTATGTTGGAAAATATATGGAGGCCGGATCTTTTCTTTGCTAATGAGAAACATGCTAACTTTCATGAGGTTACCACGGAGAACAAATTGTTGAGAATTTATAAGAACGGAGACGTTTATTCAAGCGTTAGATTAAGCTTAACATTGGCGT…
Gpr113	KH.L53.21	GPR113	ADGRD1; ADGRE2; ADGRF3	Cirobu.g00012773	2.34357	3.16132	0.000308594	-1.16654	0.204782	0	https://www.aniseed.cnrs.fr/aniseed/gene/show_expression?unique_id=Cirobu.g00012773	https://www.aniseed.cnrs.fr/aniseed/gene/show_gene?unique_id=Cirobu.g00012773	http://ghost.zool.kyoto-u.ac.jp/cgi-bin/fordetailkh21.cgi?name=KH.L53.21;source=kh2013	Negative	Twist BioScience	500	ATGCTCGGTACAGGTGCTTGGATGTTTCTGGAAGCTTTCACATTAGCGATGATGACATCTCATAAAGCTCTTTACTTCGATTCTGTAAGCAGAAAGAAACTTTACATATTTCGTGTTTTTCTTGGATGGGGAGCCCCTTTTATGGTTGCCATGGTTACTTTTGCAATCGGGATGTCGACCGGAAACTACGTGAAGAAAACGGAAGCTCAAATTCGAGGATTTGATGCAAACGAGTTCGATCGATGTTGGTTGACAAATAAAGGAGGGGTGTTGCTGGGAGCAGCTGTCATACCACTTGCTCTTATCTGCGTAGTTAATTTTGCCGTTGCAGTCAAGGTTCTACTTTTCATCCACGAGAAAAGCAAGGAATCTTTAAAGTTTCTCCCGATGCCAGGTAAG…
Gstm	KH.L134.30	KH2013:KH.L134.30_GST-1/10/25/41	GSTM1; GSTM3; GSTM4	Cirobu.g00011096	2.22426	1.92495	0.0663703	-0.957658	0.359974	0	https://www.aniseed.cnrs.fr/aniseed/gene/show_expression?unique_id=Cirobu.g00011096	https://www.aniseed.cnrs.fr/aniseed/gene/show_gene?unique_id=Cirobu.g00011096	http://ghost.zool.kyoto-u.ac.jp/cgi-bin/fordetailkh21.cgi?name=KH.L134.30;source=kh2013	Negative	Twist BioScience	500	AGGGTTAGGCGAACCTATTCGTTTAATGTTGGAATACGCTGGGTTCGAATACGAAGATAAGAGATATCAGTTTATAAAGGAGAAGGAAGATTACAGTGACAGGAATTGGACCGAGCCCAAGTATTCGCTTGGCTTCGATTACCCCAATCTTCCCTATTTAATTGATGGAGACGTTAAAGTTACTGAGAGTTGGGCTATCATGAAATATCTGTCAAGAAAATTTGAAAAACTTGGCCCTGAAAACGAAGAAGAACGGATCAAGTGTGACGTCACAGAAGGCGTTGTTCAAGATGTTCGAAAGCAGTTTTACGACTTATGTTACTCAGCAACGTTTGTGACGTCGAAAGAAGAATTCCTGCAAGAAATCGCGCCAAAGTTGGAACAACTGCAACGGAGTTT…
Hmbx	KH.C1.941	HMBOX1	HMBOX1; HNF1A; HNF1B	Cirobu.g00001230	3.10763	0.782845	0.408225	-2.28957	0.0210205	0	https://www.aniseed.cnrs.fr/aniseed/gene/show_expression?unique_id=Cirobu.g00001230	https://www.aniseed.cnrs.fr/aniseed/gene/show_gene?unique_id=Cirobu.g00001230	http://ghost.zool.kyoto-u.ac.jp/cgi-bin/fordetailkh21.cgi?name=KH.C1.941;source=kh2013	Negative	RT-PCR	999	ACCAGATCCTTCTCCTGCAAAAGTTAAAGCAAAGTGGTCTCACCAAGTCGCAGATTATAAAAGGACTTGATGAGATGGAAAGATTCGATGATGTGGGACTCGGGAGCCCAGGAGCAAGCGTATCATCATCCACTCAGCAAGTACCGAACGGCAATTCCCCTAGCAGTGTAGGGTCGACTAACAGTGGCAATACAGTGACATCATGTGCTAACGCTGGAGCACGACGCAACAGCACAAGTCCTCAGTCGCCCCATTTACCAGTAAAGACGAATACAGTGATTCCTCATCCCCAGCCTATCCCCAACCATTTGATGTTTGGAGCTCATATGCAGAATGCAAGCCAGCTCTCGCTTATACCGCCTGTTGCTGCGTGGCCAAATACGTCACAAGCCGTTGCCG…
KH.C1.236	KH.C1.236	KH2013:KH.C1.236	CD209; CLEC17A; CLEC4E	Cirobu.g00000455	1.54158	4.58482	0.000175572	1.02144	0.439099	0	https://www.aniseed.cnrs.fr/aniseed/gene/show_expression?unique_id=Cirobu.g00000455	https://www.aniseed.cnrs.fr/aniseed/gene/show_gene?unique_id=Cirobu.g00000455	http://ghost.zool.kyoto-u.ac.jp/cgi-bin/fordetailkh21.cgi?name=KH.C1.236;source=kh2013	Negative	Twist BioScience	500	CCAGCAATGTACCGAATCTAAGATGGGTGCCGGTTGGAAACGGTTACCAATACTACCTTGGAACGCAACTCGGAAATTACTCCGAGTCACGGAAATTTTGCAAATCAATTGGAGCAGATCTGGCAGCAGTAGGAGTTCGGAATGTTGAATATAGAAGAATCATCACCAAGACAGTCATCCAAGACAAAGTCGGTAACCGCAGTGCTTGGATAGGAATGAATGATATTGCAAGTGAAGGAAATTGGGTTTGGATTGACAACCGTAAAGTCATCGCGGGAGAATCAGACTGGGCAGAATTTCAGCCCGATAATGGTGGTGGCATTGTTCACAGACAAAACTGTGGCATAATGGCTTCTTACTTCCAAATGCACTGGGACGATGTATCTTGTGATGAAGCGG…
KH.C1.568	KH.C1.568	Ci-Endo2	KH.C1.568	Cirobu.g00000818	3.73476	1.81744	0.00508938	-0.641129	0.318833	0	https://www.aniseed.cnrs.fr/aniseed/gene/show_expression?unique_id=Cirobu.g00000818	https://www.aniseed.cnrs.fr/aniseed/gene/show_gene?unique_id=Cirobu.g00000818	http://ghost.zool.kyoto-u.ac.jp/cgi-bin/fordetailkh21.cgi?name=KH.C1.568;source=kh2013	Negative	Twist BioScience	500	AGAAGCCACAGCCCCACCCTTAGTGCGTCTAGTACTTCCTCCAAGAAGATGAAGAGAGGAATCTCGGCATCGGGGCTCAACACGCTAAGGAGCGCACAAGCAAGTCTGAAGAAGAAGTTTTCACGCTCCCATCTTCAAAAATCCCCCCTCGTTGAAAGGAAAGCAACAGGTTCTTGTTCTAAAGACGGTAGATTTGATTCGGACACCGGGAGTTTGGACAGCGAGGTTTTTATGTCAAGCAAAGGATCAAGGAAAGCAAGCGAAGATTCCAATCATAATAACTCAACACACCAGAAGGATGAAAATATAAAGACATTGGATGTAAATGACACCAAACCTCCGGTGTCTCCAACGAGGGAGAGGTGCGCTACAGTCAACACTTCACATAAAGTGATATTG…
KH.C1.84	KH.C1.84	KH2013:KH.C1.84	KH.C1.84	Cirobu.g00001118	2.23994	3.60275	0.000815519	-2.30889	0.0403564	1	https://www.aniseed.cnrs.fr/aniseed/gene/show_expression?unique_id=Cirobu.g00001118	https://www.aniseed.cnrs.fr/aniseed/gene/show_gene?unique_id=Cirobu.g00001118	http://ghost.zool.kyoto-u.ac.jp/cgi-bin/fordetailkh21.cgi?name=KH.C1.84;source=kh2013	Negative	Twist BioScience	500	AGCAATGCGAGACGCATGGGCTGTGGGTTTTGTGTTTATTGCTAGACAAGGATCGATTGACGTATACATTGCACTATATGTGGCGGCAATTATGGTATACTGATATTCTATTATACATGAAGAGCCTGTCCGTTCCTTCATGTTTGTTTAAATGTAGTTGTTGCGGAAAGAGGACTTGCTGAAGTATCTACATACACACCACTATCACACAAAGGGTTGGTATTTGCAGTCCTTTATACTTCCAAATGGGACGAAAAAAGATGATTAAAAAATGTCCAATCTTACTCCACCCTATACTATATCTGTCGACTTCATACCTTTTGTCTGCGAAGTAGACAACCGGCAATGTATAAACAAGTGATATGCACCAAACGACAGCTAGAATTTTTTTCGCTCGCT…
KH.C12.122	KH.C12.122	KH2013:KH.C12.122	KH.C12.122	Cirobu.g00002648	1.61314	0.845945	0.241821	-1.71979	0.0291688	0	https://www.aniseed.cnrs.fr/aniseed/gene/show_expression?unique_id=Cirobu.g00002648	https://www.aniseed.cnrs.fr/aniseed/gene/show_gene?unique_id=Cirobu.g00002648	http://ghost.zool.kyoto-u.ac.jp/cgi-bin/fordetailkh21.cgi?name=KH.C12.122;source=kh2013	Negative	RT-PCR	525	CCATAGAACCGCCAGCTAACCGTGATGTTGATATTGGTGACTCCAACGATCCCCTATTTGATAAACCCATCCAACACCACCATCAAGACAAAAAACATAAAAAGAAAAAACACCACCATGGAGGGCTAATAATACAGACACTTCCTCCATCGCCTCGTGATTGCTGCGACTTCCTGGACCCTTACTGTAACAACGACCTTCATCTCGCAATTATAACCACAGCACGTGATACAAAAGATGAAGAATTGAAACAAAAGTACTCCAGTAAATCGCGCAGTATCTCTTGGGTTGGAATGCTACTGTTCACCGTGGTTGTCACAATAGCGGTTGTAATACTTGCAACTTGTGGTATACTATAAAGTATTTCACTAAGTGGAACAATTTTGCTTGCATATTACT…
KH.C12.22	KH.C12.22	KH2013:KH.C12.22	KH.C12.22	Cirobu.g00002754	3.57588	1.01638	0.113515	-0.0818174	0.904224	0	https://www.aniseed.cnrs.fr/aniseed/gene/show_expression?unique_id=Cirobu.g00002754	https://www.aniseed.cnrs.fr/aniseed/gene/show_gene?unique_id=Cirobu.g00002754	http://ghost.zool.kyoto-u.ac.jp/cgi-bin/fordetailkh21.cgi?name=KH.C12.22;source=kh2013	Negative	Twist BioScience	500	GGAGGTTATTACGTCAGAGACACGTCACAACACATGGACATACGTCATCGGGGTCACGTGGTCAGATACAAGAGAGCACAAGATTCAACGAAACTACAACGAAATAACTCAGTTCTACAACTTGATCTACCGTTTGATCGCCAGCGATAAAAACGCAAAGCTGAGGTTTCTGAAAGATTTGCCGAAAGTCCCAGCGCGTGGTTTCTTTGATTGGAGTTCATTCAAACTAATGGTTCGAAACCAAGCAACCGTCGATTCCTTTCTACGAGTTCTCATCAAACTGCCTGCACAGGTATCACGTCATCAGAGCGTCCTTGACTTTTTCGAGCTCCACGATTCCGACGCCTTAAATGACGTCACAAAACTGAACAATTATAAATCGAAGACGGTTCCTGAAAC…
KH.C3.315	KH.C3.315	KH2013:KH.C3.315	KH.C3.315	Cirobu.g00005486	3.32778	4.01392	1.15e-09	0.746995	0.24149	0	https://www.aniseed.cnrs.fr/aniseed/gene/show_expression?unique_id=Cirobu.g00005486	https://www.aniseed.cnrs.fr/aniseed/gene/show_gene?unique_id=Cirobu.g00005486	http://ghost.zool.kyoto-u.ac.jp/cgi-bin/fordetailkh21.cgi?name=KH.C3.315;source=kh2013	Negative	Twist BioScience	500	GATGAACTCTTGGAAAAACATCTGCCATCGCTTACTTTTCTTAGCGTTTGTTGTTATTGGAACGAATGAAGCGCTGTCGATTGCACCACACAGGATTGCGCGATCGAATACAAAATCTGGATTACCATCAAGTGAATACTCGAATTTAAATCTAGTTTCGCCGCAGGTGCTGAAAAGTTTGACTCAATCCAGTTTACCCGATGTAACTGCAGAAGATTACAATGAGTTTGACAATGAAAAGTTGTTTTCTGAACTCATAAGCTTGATGTTTCTTCTTACGGAAGATTCTGAGCCATCTTCGCAGAACATCAATTCATCAGCATCTCCACCTTCACCTCAAATAAATCATCATCCGGATTTTAACAGCTTATCCCACCTCCCACAAGAAGCAACAGAGGA…
KH.C3.966	KH.C3.966	KH2013:KH.C3.966	KH.C3.966	Cirobu.g00006156	0.922391	0.948055	0.398998	-2.7161	0.0409524	0	https://www.aniseed.cnrs.fr/aniseed/gene/show_expression?unique_id=Cirobu.g00006156	https://www.aniseed.cnrs.fr/aniseed/gene/show_gene?unique_id=Cirobu.g00006156	http://ghost.zool.kyoto-u.ac.jp/cgi-bin/fordetailkh21.cgi?name=KH.C3.966;source=kh2013	Negative	RT-PCR	989	GGAGGAGAACGGGAGAAGAGAAAGACTCGGATTCCGAAAACCGCCGAAGATCTTCCGAAACCTATCATACGAAATAAGAACACGCCGCCAAATAAATCCAGAGTGATGATAAAAGAAGAAACATCTCCAAACAAGATGTCTCCCAGTCACAACGCAACAGCAATTCCAATACCAACACCGTTACGAGGAGACGTGGATAGTCCTCTAAAACCGTACAAACCAGAAACACAAAAAGCAATTGACGGACACGCTGGAATGAAGGCATTAAAAGAACTGTTTGGTGCGATCGGAATGGGAACCAGGATGTTGGAATTCAAAGACATGCTCGAGGTTGGTGTAAAGGTAGCTGTTGGTATGGGAGCCCATATCTCAAGACTTGCACTTGAAGATCTCAACACA…
KH.C8.500	KH.C8.500	KH2013:KH.C8.500	KH.C8.500	Cirobu.g00009141	2.88875	1.50871	0.0277766	-2.26805	0.00203259	0	https://www.aniseed.cnrs.fr/aniseed/gene/show_expression?unique_id=Cirobu.g00009141	https://www.aniseed.cnrs.fr/aniseed/gene/show_gene?unique_id=Cirobu.g00009141	http://ghost.zool.kyoto-u.ac.jp/cgi-bin/fordetailkh21.cgi?name=KH.C8.500;source=kh2013	Negative	Twist BioScience	500	GAGGGCGGTAAAGTGTCGGCATCCTCGTTCGTACTCGCCATGTTCATACCTCTAATTGCGACGTTTTTATTATCGATTATTATGGTGCCTATTAAGAACAGCAAGCTACTACAGCGCAAGATGGTTGGACGTGGCAATCGACCAAGTATGGAGGTGACAGCTGAAGAAACCATACGAACCATACAAAATTCAGTTCAATTTGTAATTGAGTTAGCAGCATTCTATTGCATGGTGTACAAAATTTGGGAACTATCGGATTCAGTTCTTAAATGTGCTGGATATGCACCATGTCTGCCAACCTACAAGTCACACCAGCTCATCTTTTTGGTTGTTGTTGCCCAAACACCTTGGATAACAATACTATGGAGTTTGATCTAAAGATAACATACCACGTCATAC…
KH.L37.40	KH.L37.40	KH2013:KH.L37.40	TMEM200A; TMEM200C	Cirobu.g00012404	1.42571	2.96908	0.0102976	-3.042	0.0253329	0	https://www.aniseed.cnrs.fr/aniseed/gene/show_expression?unique_id=Cirobu.g00012404	https://www.aniseed.cnrs.fr/aniseed/gene/show_gene?unique_id=Cirobu.g00012404	http://ghost.zool.kyoto-u.ac.jp/cgi-bin/fordetailkh21.cgi?name=KH.L37.40;source=kh2013	Negative	RT-PCR	541	AAAAGGAAGACCAGCGAACATGGGGAGTATACGATCTTCACGTACGTGGTCGCATCAACCCCCGATCATGGGAGGCACTTGGTGTTATTGGGAGTTTAGTTGTGATCGGTATCGGGTTTAATACGGCAGCTACAGACCCGGGGTTGAAAGGAGCGATATTGATGGGGGTTGGATTGTTTTTGTTGATTATATCGGTGGCTGCACTTCTACAGCAAAGGGATAAGAATTCTGTTGTAATTATCATGAAGGATTTATACACCATGTACATAGAAGCGTACACCGATCGTTTTGAAGCGGATGAGGAAGACGGACGGATTCATCGCAATCACCCCGACTTTCAACCACCAACCTGTTCACTAAGTCCTGCAACTTTTGAATGGGCTCAGGTTCACCGTTCTT…
KH.S1555.3	KH.S1555.3	KH2013:KH.S1555.3	KH.S1555.3	Cirobu.g00013951	3.09969	4.23601	3.77e-05	0.428266	0.635897	0	https://www.aniseed.cnrs.fr/aniseed/gene/show_expression?unique_id=Cirobu.g00013951	https://www.aniseed.cnrs.fr/aniseed/gene/show_gene?unique_id=Cirobu.g00013951	http://ghost.zool.kyoto-u.ac.jp/cgi-bin/fordetailkh21.cgi?name=KH.S1555.3;source=kh2013	Negative	Twist BioScience	500	TTCAAAATCGCCATCTAGATGTACAAACGTGCATGTAATACCAGTATTAACATCATTTGAAGGAATGTTCAAGTGTCTGAGCAATAAGTTTTGTACACGAAAAATAATATGAATTTAATTTATTCATCAATGGTAGAAGCGAACAGCCTTGAACCCATTACCGTTGTGTTACAAGCAGGCGCGTTAACCGCTTTGCCACGGCGCCATGCAGTCGCCACAGTATATTTAACGCGTTCGCCTCTTGTTAAGAATCAAGCCTCTATGCTGCCACCATGTGTGCATTGGTGAATAAGACAAAGTAATTGCCCCAACAAAGTGGTGAGTTGTAGAAATTGTTATCCAAACATTAAAAATAAAATTACAATCTAATGTATTACCAACACAGTTAATTTACGTGGT…
KH.S2542.1	KH.S2542.1	KH2013:KH.S2542.1	KH.S2542.1	Cirobu.g00014266	3.34479	4.02253	5.33e-06	-0.616452	0.508538	0	https://www.aniseed.cnrs.fr/aniseed/gene/show_expression?unique_id=Cirobu.g00014266	https://www.aniseed.cnrs.fr/aniseed/gene/show_gene?unique_id=Cirobu.g00014266	http://ghost.zool.kyoto-u.ac.jp/cgi-bin/fordetailkh21.cgi?name=KH.S2542.1;source=kh2013	Negative	Twist BioScience	500	TGGTTTCGGTTGCTTTCTGAGTTGTACTATTCCTCTTATCGTTCTTGCCTTCGGCTTGTTGTGAGAATAAAGGGCAGTCCTTCGTTCTGGCAGGGCACTCTGCTTGCTTATGACCTGGCTTTTGGCAGTATTTACAGGTAAAATCCACAAAATCACCTCTTCTGCTTGCAATACCAACAAGTTTCCTAGTGCGAAATCAACTTCCTTAATTAGCTTACAGAGCTCTTCCTCTACCATTACATTTATCGTTCTTACCGCCGAAAATGCAGGTATTCTCATCAGAGAGGGCGCAGAAACTTTTGCAGCGTAACTAGATTGAGGCATTGCGACCGTTCAGTCCAAACGCCAAACTCGAAATTGGTTTATTGATTATTAAATCTGGCCAGTGGCGGTTAGCGC…
KH.S595.17	KH.S595.17	KH2013:KH.S595.17	KH.S595.17	Cirobu.g00014764	1.21854	3.42974	0.0403535	4.6938	0.00732736	0	https://www.aniseed.cnrs.fr/aniseed/gene/show_expression?unique_id=Cirobu.g00014764	https://www.aniseed.cnrs.fr/aniseed/gene/show_gene?unique_id=Cirobu.g00014764	http://ghost.zool.kyoto-u.ac.jp/cgi-bin/fordetailkh21.cgi?name=KH.S595.17;source=kh2013	Negative	Twist BioScience	500	GTTAGGTCGGCGGTTGGTAACCATGGCAACCACTGGCACGGCAACGATGGTTGCCATGGTAGCAGAGTTGGTCAACCAATCAGCAGCTCCCGGAGTGATGACGTAATAATTGGAGAAAACGTCGTTGATTTGCCCGAACACGACAGACACAAACGAACGGATGAATATCGAGAAACACGTCACAAATAAAACCATCCATCGTGTCATAGTTGGCATTATGACATCATCATTCAATTCCTCCCAACTCTCTTCGTCGCCATCTAGCGGTTGATAATCCAAAGATTTATCGATAGTTTCGATGAACGAGTTGTTGTTGTTGAGTTCCTTCATTCGTTCAACATCGCTAAACAAACCGTGCGACATTTCGTCATCAGCGTCGCTAAGCAACGACAATGACGT…
Lrp1	KH.C1.521	KH2013:KH.C1.521_LRP1B	LRP1; LRP1B; RXFP1	Cirobu.g00000769	4.59786	3.26428	0.0441766	-1.06049	0.485459	0	https://www.aniseed.cnrs.fr/aniseed/gene/show_expression?unique_id=Cirobu.g00000769	https://www.aniseed.cnrs.fr/aniseed/gene/show_gene?unique_id=Cirobu.g00000769	http://ghost.zool.kyoto-u.ac.jp/cgi-bin/fordetailkh21.cgi?name=KH.C1.521;source=kh2013	Negative	Twist BioScience	500	CAGTGCTTTGAATCCCCTGTTTTATTCAAATGCTGTTCAAATACTCTTCACCAGGATACTGAACTATCTTTCAAAGTTTGAAACCTTTAACGCCGTACGCAAATCAATTGCCGGAATCACAATATTTAAATGCTGGAAGACTGCAACAGAGAAACGAGAGGGACAGGACGGGAAGAATCTGCTTCGTGGCCACGAAGATACAGACGGTGGACACATCGTTAAGATGAAATCACACGTGACTGAGCATACGGTGTTAGACACTGTTATGACAGAGTCTGTTGTTTAAAGTCTTAAAAGAAACACTATGACTGCCGAGAATAACTTATTTGATCATCGACTTATTGTCGGTTGATTGTGAATTACTTCTTTAACTGCTGTTGGATACTGTTGTGTGACACA…
Lrrd	KH.C9.375	KH2013:KH.C9.375_LRRD1	LRRD1; LRRIQ4; SHOC2	Cirobu.g00009914	4.42806	3.50417	0.00184359	-1.65936	0.122788	0	https://www.aniseed.cnrs.fr/aniseed/gene/show_expression?unique_id=Cirobu.g00009914	https://www.aniseed.cnrs.fr/aniseed/gene/show_gene?unique_id=Cirobu.g00009914	http://ghost.zool.kyoto-u.ac.jp/cgi-bin/fordetailkh21.cgi?name=KH.C9.375;source=kh2013	Negative	Twist BioScience	500	TATGCGAGCTGGAACACCTTGAGAATATTTCTTTGGATCACAATCAAATACAAAACCTTCCCGAATCGATTAGTAACTGCAGAAGTCTCCGAAAACTATCTGTGGTTGGTAACGTTCTTGAGAAACTTCCGGAAAGTATTTGTGAACTTCCAAATCTTAAATCACTTGACCTAAAAGGTAACCAGCTGACTGAACTGCCAACACAGATTCATCGCCTTGAAAAACAACTTAGTCATATTTCCTTGGGTGAAAACCCCTTGAAAGATCCATTGAAAGTGGTTGCGATGACTGGTGACATTAATCCCATTGGAAAATATGTCAAGTCAGCTGAAGACAGAGGAGAAGTTTTGTTGACAAAGATGATGCATTACATTGCTGTTCATTGTCCTATAGATGAGT…
Nlrp-related	KH.C9.81	KH2013:KH.C9.81_NLRP1/10/11/12/13/14/2/3/4/5/6/7/8/9	NLRC3; NLRP3; NLRP9	Cirobu.g00010394	3.29867	0.730557	0.140755	-1.79193	0.000664253	0	https://www.aniseed.cnrs.fr/aniseed/gene/show_expression?unique_id=Cirobu.g00010394	https://www.aniseed.cnrs.fr/aniseed/gene/show_gene?unique_id=Cirobu.g00010394	http://ghost.zool.kyoto-u.ac.jp/cgi-bin/fordetailkh21.cgi?name=KH.C9.81;source=kh2013	Negative	RT-PCR	1000	ACTCGAGGAGCTCCAAAACAATCCCAAAGTCATGATCATTATCGATGGCATTGATGAAGCCAATGTATCTCTCTCTTCCGAAGTTGGCAACTGCAACCTGTATGGCCGACACACAGGCGAAGTTATTCTGAAGAACATACTTCAAGGTAATTTCTTTCCATTTGCCTACAAAGTGGTGGTCGGGCGGGTCAGGCAGTTTTTTCAGCTGTCTCCCAATTACCGGCCAAAATTTGTGCTTGAGGTAAATGGGTTTACTTTGGATTCACAGAAAGACATCTGCCATCAAATTTGTGGCCTCCAGGCTGCTGCGGTTATACAATACCTCCATGAGCATCCAAACATTGCTTCATACTGTTATGTTCCTGTTAACTGCATTATTACAATGGAGACACTGCGTAG…
Scn9a	KH.C5.200	NACP60E	SCN11A; SCN7A; SCN9A	Cirobu.g00007067	6.25021	1.2175	0.0130854	-0.339616	0.484459	0	https://www.aniseed.cnrs.fr/aniseed/gene/show_expression?unique_id=Cirobu.g00007067	https://www.aniseed.cnrs.fr/aniseed/gene/show_gene?unique_id=Cirobu.g00007067	http://ghost.zool.kyoto-u.ac.jp/cgi-bin/fordetailkh21.cgi?name=KH.C5.200;source=kh2013	Negative	Twist BioScience	500	CAATAGTTGCAGTAAGTATGACATCACAGTATGTACTATTCCTTGACAGAATTGTACTCTCACAAGCCGCACAGTTCCGATCTTTAAGAACCCTTCGTGCTTTAAGACCATTGAGGGCCATTTCTAGATGGCAGGGAATGAAGGTTGTAGTAAATGCATTGATCTACTGCATTCCATCCATTGGGAATGTACTGTGTGTGTGTCTCCTCATATGGATGGTGTTTGGAATTATGGGGGTGCAGTTTTTTAAAGGGCGATTTTTCAAATGTGTTGACGCTAATGAAGAAAAAGTGACAGATCTTCGTGTTGTAAATTATACAACTTGTATCCAGCATAATTATACATGGATTAATCCGAATGTTAATTTTGATCATGTTGGAAATGCAATGATTGCTTTAT…
Srd5a3	KH.C2.554	KH2013:KH.C2.554_SRD5A3	SRD5A1; SRD5A2; SRD5A3	Cirobu.g00004764	0.629882	0.943121	0.26512	-2.80245	0.0052263	0	https://www.aniseed.cnrs.fr/aniseed/gene/show_expression?unique_id=Cirobu.g00004764	https://www.aniseed.cnrs.fr/aniseed/gene/show_gene?unique_id=Cirobu.g00004764	http://ghost.zool.kyoto-u.ac.jp/cgi-bin/fordetailkh21.cgi?name=KH.C2.554;source=kh2013	Negative	RT-PCR	650	CCAAAGCGATGGTTTACACATTTCTATGTAGTGGCTTCAAGTTTCAATCTGATTTCCCTGGTTTCTATCATTGCTGGCTGTACAGGTTCATTATTTTACATGTCTCTTTTCTCTTGGATGAATATTCATGCTTCTGTAACCCCAACAGGTGACAGATTATCGCTGGTTATTGCTGTATTACTGCTGACAATTCAATCACTCCGTCGTTTGTATGAATGTTTATACGTGAGCATGTTCTCAAAAACTGCAAAGCTAATGTTTGTGCACTACATATGGGGCCTGTTGTATTATCCATTTGTGACAGCAACCGTGGTGTCAGAGTGTTTCCCAATATATCATCTGTCAGTAGGATATTTGACCTGGAAACACTGCTTTGGAATTCTACTTTTCATCGCTGCT…
Tff1	KH.C14.253	KH2013:KH.C14.253_TFF1	TFF1; TFF2	Cirobu.g00003674	3.462	3.78548	5.51e-10	-0.412795	0.511691	0	https://www.aniseed.cnrs.fr/aniseed/gene/show_expression?unique_id=Cirobu.g00003674	https://www.aniseed.cnrs.fr/aniseed/gene/show_gene?unique_id=Cirobu.g00003674	http://ghost.zool.kyoto-u.ac.jp/cgi-bin/fordetailkh21.cgi?name=KH.C14.253;source=kh2013	Negative	Twist BioScience	500	ACGTAGTTTGCTGGATGACGTTGGTCGGCCAAACACCGGGTTCTTGCGTGTCTGCATGTAAAACTACATACGAAATCGATGTTTTCAAATCCAACGTGTCTGTTTGCCTCGGGCTTGGTACAGAAACAGCTCGATCAGCTTCCACAGAATGCGACACGGACCTTCCGTGTTGGATAGATAGGTTCGGAAACCGGGCTCTACATTGTTTCAGACTTTACCAAATGACTGGTCAAAGCTTTGTCGTAGAAATTCCATCAACTGAAGAACCATTGCTGCCACAAGAGGAGCTAGTACTTCCACTGACGTCATCACGACCCACACCAATCATACAAAGAGAAGAAATAACGAGAGAAGAGCCAGAGATCGAACCGGAGGAACCGGAAGAAGGGAACTCTCCTC…
Trpc	KH.C7.587	TRPC2/4/5	TRPC4; TRPC5; TRPC7	Cirobu.g00008447	0.250758	0.532394	0.500982	-2.12801	0.0167141	0	https://www.aniseed.cnrs.fr/aniseed/gene/show_expression?unique_id=Cirobu.g00008447	https://www.aniseed.cnrs.fr/aniseed/gene/show_gene?unique_id=Cirobu.g00008447	http://ghost.zool.kyoto-u.ac.jp/cgi-bin/fordetailkh21.cgi?name=KH.C7.587;source=kh2013	Negative	RT-PCR	1008	ACCAAGCAACACGACAACTGAGATTGTGGGCGGCGGTAACGGCGCAGGAGGAGCCCGAGTTCTCAACGCTCTGGACACTTTCCAAATTCTATTTTTTGCTTTGTTTGGATTAATTGAACCGGATAACTTACCCCCAATCAACCAAAGTCCAGTGTTCTCAATATACATTGTTCAAATTGTATTCGGCCTTTATCACGTCATTACACTGATTGTTCTCATCAATTTGCTAATAGCTATGATGTCGGATACATATCAACGTATACAGGCACAATCAGACACAGAGTGGAAATTTGGGCGAGCTGAACTGATAAGATACATCAAGAAAACAAGTTTATCGCCATCCCCAACTAACTTGTTGATTACAGCATATACTTACAGCAAGCTATTTATTAAACATAA…
Calcr	KH.C3.635	CALCR	CALCR; CALCRL; PTH1R	Cirobu.g00005830	4.34414	4.11556	6.94e-05	-0.389557	0.681046	0	https://www.aniseed.cnrs.fr/aniseed/gene/show_expression?unique_id=Cirobu.g00005830	https://www.aniseed.cnrs.fr/aniseed/gene/show_gene?unique_id=Cirobu.g00005830	http://ghost.zool.kyoto-u.ac.jp/cgi-bin/fordetailkh21.cgi?name=KH.C3.635;source=kh2013	Other CNS	Twist BioScience	500	CTACATTCCAAATGCGTCTGTGCTCAGAGTGTTGTCTTACATCACCAACGTCTTAAGCAGCTTCCAAGGTTTTGCTGTTGCTATCATCTTCTGTTTTTGCCACGAGGAGGTCGCTCAGCAGGTCAAAAAGTTCGTATCACGTCGATGTGGCATTTTTAAGTTTAAGCAACAAAGTCAGAGCAGCAAGCGTAACAACGCTGGCCTCGAGATTACGGATGCCACCCAAATCGAACTGATGCCACGTCCGTGTCAAGAATGATAAACGTCAGAAACAGTGTTGAAAACCAGATACTTGGATTCTCATTGACATGCTTGTGTCCTTGCCGCATTATTAATTTGCTGCATCATATTGCCACTGCTTTTGTGCTTCGTTAAATGCGATGTTACGCCGTTAGGTAC…
Fgf20	KH.C14.70	FGF20	FGF20; FGF5; FGF7	Cirobu.g00004079	3.73329	3.30735	8.74e-09	-0.287157	0.638154	12	https://www.aniseed.cnrs.fr/aniseed/gene/show_expression?unique_id=Cirobu.g00004079	https://www.aniseed.cnrs.fr/aniseed/gene/show_gene?unique_id=Cirobu.g00004079	http://ghost.zool.kyoto-u.ac.jp/cgi-bin/fordetailkh21.cgi?name=KH.C14.70;source=kh2013	Other CNS	Twist BioScience	500	AAGGGCAATCGATATGTTGCAGCTATACCTCACTGAAATTTCGTTCAATCGTATTTTCGTGTCTGCGGAGCGCTCAAGATGTGTATGTGCGCTGATATAATGAATGTAGCATTGAATGCTATACGGTTAACCACTACGTACTTCTATTTATATAATATATATCTATATACAGCCTCGTGCGCAGAGTTCAGTATTTTTGTCCCTATTTATTTTTCAGAGCATTGGTGATATTGTTTTCGTACTACACGTTCCTTTGTACGTATCCTATATATATGTTCTTGTTTTGTCTTTCTTGCCCACTGCTACTTCATATCAACAACAGTTCCGGACACCAAACAAAAATTTTGCAGGCCTCGTTGCATTAATTGCTGTTTACTCCTTTTTACTATTGCTTTGTAA…
Gabrb	KH.C9.860	GABRB1/2/3	GABRB1; GABRB2; GABRB3	Cirobu.g00010449	4.10528	2.97376	0.0215026	-2.51022	0.0487225	0	https://www.aniseed.cnrs.fr/aniseed/gene/show_expression?unique_id=Cirobu.g00010449	https://www.aniseed.cnrs.fr/aniseed/gene/show_gene?unique_id=Cirobu.g00010449	http://ghost.zool.kyoto-u.ac.jp/cgi-bin/fordetailkh21.cgi?name=KH.C9.860;source=kh2013	Other CNS	Twist BioScience	500	TAAGGAACGCCTGAGCCATGTAAATCGTGATTGCATTCGACTCGGTGCCGGCCACCAAGGGCATTCGGTCGAAAATTTCGATTTTATGCTTTCCTGGAACGAGCTAGCGTTCCCACGGGACCAACGAAGGGCCGGGCACGCGGTATGCACAACGCCGCGAATGGCAAACGTAGAGGGCAGCCAAGCAGGAACTCCGTTGGAAAGAAAAGAAAGGGTTACGCATCTCGGGCAAAGAAATCTCTGTCGGCTTTGAAAGTTCCTAAGATAAGCGACGTCAGCATTATAGACAAAGTGGCAAGAGTGGCGTTCCCAGCGTCTTTCGCAATTTTTAACTTTGTCTACTGGACCTACTACATTTTCTTTTGAGTTGCCATCACAGTGGGTCTTATTTTTAATTGG…
Gjc1	KH.C4.804	KH2013:KH.C4.804_GJC2	GJA8; GJC1; GJD2	Cirobu.g00006929	5.50451	2.04992	0.00346891	-0.427211	0.527774	0	https://www.aniseed.cnrs.fr/aniseed/gene/show_expression?unique_id=Cirobu.g00006929	https://www.aniseed.cnrs.fr/aniseed/gene/show_gene?unique_id=Cirobu.g00006929	http://ghost.zool.kyoto-u.ac.jp/cgi-bin/fordetailkh21.cgi?name=KH.C4.804;source=kh2013	Other CNS	Twist BioScience	500	GTTAGACGAAATACACTTGCATTTGCACAGTACAGGTTACCTTACCAACCCGAATACTACCAAGACGAATTTCTTAAATCCCGCGAGGAAATATTAAATACCTGAAGAACCCACATTCGAACAGAGCAGGAGACAGTTATATTCCAGCAGGGCAGAATTTTGAGCAAACATGTCCTGGCACTTCGTAGAACGTTGGTTACAAAAGGTCAACCAACATTCGACCCTCATTGGAAAGTTTTGGATCACTTTCCTTATCGTGTTTCGAATCGTGGTTGTGTCCAGTGTGGGTGATCGTGTGTATTCGGACGAGCAAAGCGAGTTTAAATGTAATTCAATGCAGGTTGGGTGTCCAAATTTATGTTTCAACAAGTTTTCTCCGATATCCCACATTCGATTCTG…
Gucy1b1	KH.C2.674	GCY-32/34/35/36/37	GUCY1A1; GUCY1A2; GUCY1B1	Cirobu.g00004896	6.70277	3.46049	0.000471879	-0.967169	0.289114	0	https://www.aniseed.cnrs.fr/aniseed/gene/show_expression?unique_id=Cirobu.g00004896	https://www.aniseed.cnrs.fr/aniseed/gene/show_gene?unique_id=Cirobu.g00004896	http://ghost.zool.kyoto-u.ac.jp/cgi-bin/fordetailkh21.cgi?name=KH.C2.674;source=kh2013	Other CNS	Twist BioScience	500	TACCCCACTGGGTCGCCAACCAGTTACGACATAAAAAGAAAGTACCGCCGAAAAGATTTGACAATGTAACTATTCTGTTCAGCGGACTTGTTGGATTTAGCGAGTTTTGTGCGAAGAATACGACGTCAGACGGGGCTATGAAAATAGTGCAATTGCTTAACGCTGTGTATACGACCTTCGATCGGCTTACCGACCCGAAGACGAACCCATTCGTTTACAAAGTTGAAACCGTAGGCGACAAATACATGGCAGTGAGTGGTCTTCCCGAACCTTGTCACGATAATGCTCGGCATATCTGCGAGATGGCGCTAGAGATCATGGATTTGAGCAGACAGATTAACATTGACAGTCATTCTATAAAGGTGACAATAGGTATTCATACTGGTGATGTTGTAACTG…
Igsf9-related.a	KH.C3.506	ESAMA	KH.C3.506	Cirobu.g00005691	5.10486	1.65103	0.00492642	-1.16811	0.0481372	0	https://www.aniseed.cnrs.fr/aniseed/gene/show_expression?unique_id=Cirobu.g00005691	https://www.aniseed.cnrs.fr/aniseed/gene/show_gene?unique_id=Cirobu.g00005691	http://ghost.zool.kyoto-u.ac.jp/cgi-bin/fordetailkh21.cgi?name=KH.C3.506;source=kh2013	Other CNS	Twist BioScience	500	CGCCCCACGGTGTCACCTCTCCACATCCAAACTTATGTCAGGACAATGACAATGTAATTTCAAGAGATCACCAACAACAAATCGATGACGTTGTAATAGCTGGATATGGAAGTCGATTTTGTGACATCAGTGATATTACGTCACACCAGACTCCACTTTTGTCTTCATCTCCAATTAAAAACCGTCCCAATGATCAAAATCCACTCAGGGAGCAATCTTTTAACAAAGAACAATTTCTCTTGCAACACAGAAGACCAAGAACTCGAGCCAGCTACAGTTGTGACTATGAGCGTGCTAGACCGCATCGGTGGAATCAAAACCACAGTTTGGACGACCGCTCCGTAGCGCTAGAGATCGACTGCAGTAACAGTGACATCGAGGTTCGTTACATCAAGAGTC…
Igsf9-related.b	KH.C3.806	KH2013:KH.C3.806_IGSF9	IGSF9	Cirobu.g00006013	4.52456	2.01093	0.000387878	-1.34159	0.0203711	0	https://www.aniseed.cnrs.fr/aniseed/gene/show_expression?unique_id=Cirobu.g00006013	https://www.aniseed.cnrs.fr/aniseed/gene/show_gene?unique_id=Cirobu.g00006013	http://ghost.zool.kyoto-u.ac.jp/cgi-bin/fordetailkh21.cgi?name=KH.C3.806;source=kh2013	Other CNS	RT-PCR	1008	AGCTCACCCTCAAAACTTCGAGCTTTCTAAAACATGTTCGCCGGATCAAATCAATAAGCCTTATAATCTAATGCAGGATCTTCAAACTGACACGAGCACATGCCAATGGGGAAGCCTTGGTAGACTTTCTAAACTAAAAACTCTTTCCCTGCCGATAAATTCTTACTTACCGCCGGAAACTGCAGTTTCTGGCATTGACGCATGTCTTCAAACCGACCTTCGGGGCGGAACCACTTCTTCAAATAATTGTCCAACGATCAGTAATTCTTCGTTCAATGGCGATAGTACCATTACCACCGGAGATGTTCGGTCTGTCAATGCATTAAAAGATGAACAAGCAAAATGCAAGTTTTTCGGAGGTGGAGCCGATGAATGTACCAATACCGCCCACCCACGTCA…
Insm	KH.C4.378	INSM1B	INSM1; INSM2; ZNF3	Cirobu.g00006463	3.22751	2.38176	0.000513082	-2.14355	0.00235078	9	https://www.aniseed.cnrs.fr/aniseed/gene/show_expression?unique_id=Cirobu.g00006463	https://www.aniseed.cnrs.fr/aniseed/gene/show_gene?unique_id=Cirobu.g00006463	http://ghost.zool.kyoto-u.ac.jp/cgi-bin/fordetailkh21.cgi?name=KH.C4.378;source=kh2013	Other CNS	RT-PCR	945	ATGAACCGAAAGTGCGAAACCAGCAAGAAAAACAAACGTAAAAAAGTGACTAAAGATAATGATGACGTCACAGAGGGGTTGTTGCCGTTTGTTAATTTAAAAGCTGTCAAGGAGAAACATGAAGCATCCGTGTCACCGTCGTCTCCACTCAGCACAACGTCCGAAGCTTCACAAAAATTTGACAACGAACCGGGAAATTACGATAGTCGAATAAAAGCAATTTATCCATGCCCGGGTTGCAAGCGAAGGTTTCGTCGCCAATCCAACAGAAGGAAACACGCGTTAATTAAGCATGGCTTGGACCTTGGTGGCAGCCCAGCCCGAAGCCGCACTGCCAAACCACAGAACGCAAACGGTTCAAAGCAAGCAGGAGCTCGAACGAATGCTCACCGGTCATTG…
KH.C11.353	KH.C11.353	KH2013:KH.C11.353	KH.C11.353	Cirobu.g00002179	5.37381	4.87925	8.48e-08	-2.14944	0.00961031	0	https://www.aniseed.cnrs.fr/aniseed/gene/show_expression?unique_id=Cirobu.g00002179	https://www.aniseed.cnrs.fr/aniseed/gene/show_gene?unique_id=Cirobu.g00002179	http://ghost.zool.kyoto-u.ac.jp/cgi-bin/fordetailkh21.cgi?name=KH.C11.353;source=kh2013	Other CNS	RT-PCR	730	AGTGGTATGCGCTGTGTCAGGAACTGTTGGACTTATCGTTGGCATCATAGTCGCTATGTTCGTTTTCACACAGCTTGCGAAACGTCGGAATTGTGCAAACAGGCAAATGCGCAAAACAACCACCATTAAAAGCAACCCAACGGAACAAACTTTTGAACCTCTTGACCTGTCACTCACGTTGCCTAGTTACGACCATAAAACGGATGAGCGGAAGACGATTAAAAAATATCCTTCAAGTTCAGCGTCGGAAAAAGATTTTAAAGCCCAGTATTTTAAAGCAAGGAATTATTTAGCCGAATGCAGGGAATGTTCATACCATGGATACGACGCACCTTCCCCACCAACTACAACGGCTCGCGTTACAAGAGGGGTTTGCAAGGATTATTCGCATCGGGATCG…
KH.S1212.3	KH.S1212.3	KH2013:KH.S1212.3	KH.S1212.3	Cirobu.g00013710	0.888539	0.688198	0.486433	-2.21728	0.0337426	0	https://www.aniseed.cnrs.fr/aniseed/gene/show_expression?unique_id=Cirobu.g00013710	https://www.aniseed.cnrs.fr/aniseed/gene/show_gene?unique_id=Cirobu.g00013710	http://ghost.zool.kyoto-u.ac.jp/cgi-bin/fordetailkh21.cgi?name=KH.S1212.3;source=kh2013	Other CNS	RT-PCR	710	CTGATCAAGGCGCTAGTGTGTTTGTTAAGAGGACTTCCAAGTCAGAATCCCAAACTAAACCACGTCGTATCGTGACCTTCCGATACACGTGACAAGACTTTTCATGAAAATAAAGTCAGAGCACTATTGCTTTAGTGATGTGTCCTAACTTACGATTCAATACCACTTACTTGTTAGCACTGTTATGATCGCGGAATGCCAGCTTAATATGTCGTCTTTCATAACCAAGGCCACTCCATGAAAATGTTTCAGCAACAGATTTTTTCATAAATGATTTTATGAATTCTCTGACTGTTGATCTTAAAGAGTCTTTTGTGATGTGCCGCCCCAGCGGAGCAATGACATCATCCTGTTAAAGAAAAGAACCAATATAAATATTAAATAGCTACCGTAATTTAC…
Neurotrimin	KH.C10.274	ZIG-2/3/4/5	NEGR1; NTM; OPCML	Cirobu.g00001483	5.54112	1.80915	0.00328643	-1.33742	0.029086	0	https://www.aniseed.cnrs.fr/aniseed/gene/show_expression?unique_id=Cirobu.g00001483	https://www.aniseed.cnrs.fr/aniseed/gene/show_gene?unique_id=Cirobu.g00001483	http://ghost.zool.kyoto-u.ac.jp/cgi-bin/fordetailkh21.cgi?name=KH.C10.274;source=kh2013	Other CNS	RT-PCR	1001	ATGGACAGGAGATGGAAAGGGGGGTAGGAATAATTCTCCGTTAGCAAAAACATTGCTTTCAAACCACATATTAATCGTAATTGTTACATCTGTGCTTGCTTTTTTGTTGTAGTGTGATGATTTCCTGTGACTGTCAAAAGTAATATCTATTATGTATAAAAAATTATAATCCTTGTTTTGGTGCTAAATCAGGTCTGGGTTTTAAAAGACCAGAGCTTCCAAAATTATAATTTAGTTTGGTTAATAAGCAGCTGATTTTATGTTAATCTTGTTTAAAAATGCCACAAAAATACTAAAATCCTGATTTGGAAAACTTGTTTTTAATATTAAGCTTCCAAAATAACATCCCAGTAGGTTCTGCCTAAAATTTTGCCCTTTCTAAATTCAAAAATTTTTGTT…
Phkg	KH.L87.11	PHKG1/2	CAMK4; PHKG1; PHKG2	Cirobu.g00013172	6.74896	0.973011	0.00747504	-0.770067	0.0342544	6	https://www.aniseed.cnrs.fr/aniseed/gene/show_expression?unique_id=Cirobu.g00013172	https://www.aniseed.cnrs.fr/aniseed/gene/show_gene?unique_id=Cirobu.g00013172	http://ghost.zool.kyoto-u.ac.jp/cgi-bin/fordetailkh21.cgi?name=KH.L87.11;source=kh2013	Other CNS	Twist BioScience	500	AATCGGACCTCGCCGTATTCTGTTACATGTGCATGACGTTTTTAATTGTTCTTATTTATCGTTTTCTTTTATAGTAATTGTTCTTATTTACCGAACGAAACAGCTGGCGAAAGGCAGTGGTCTGTTCTCTACGGTATAAGAAGCGATACAGAATGAATAGACCCAATTAACCATCTGCTGACAGTGTAATATCATGCCTCACTACAACGTAGTGTAGGTCACTTTACGAGTATATAATCGTATGCAGCTGCCGTTCTTCAAGCTTACTTTTTACGGCAGCCATAACATGCGGTTATAGTTTTAAGCAGGTCACTGCTGCAGTCCAACTCACTGTCGCAACACTGTAAGTTATGAAACACCGATGTTTTATTGTTGCAAAACGACGTTCGTTTTAGGCAA…
Prop	KH.C11.543	GM10391	ALX3; ALX4; PROP1	Cirobu.g00002384	2.91618	0.564238	0.521921	-2.45284	0.00950962	17	https://www.aniseed.cnrs.fr/aniseed/gene/show_expression?unique_id=Cirobu.g00002384	https://www.aniseed.cnrs.fr/aniseed/gene/show_gene?unique_id=Cirobu.g00002384	http://ghost.zool.kyoto-u.ac.jp/cgi-bin/fordetailkh21.cgi?name=KH.C11.543;source=kh2013	Other CNS	RT-PCR	1016	TCCAATGACGTCAAGACCTGAAGTTAACGCTGGGAGCTCGGAAGGACATCCGTTGTTTGTCAACTCAAACTGCGGGATAAAGTTCCCTTTCCCCTTTGGCGGAACAGGACGAAGACGAAACAGAACAAGTTTTTCTCAGCATCAACTATTTATTCTTGAGAGCGCCTTCCAGATTACTCAATATCCCGACATCTTCTACCGAGATGCCCTGGCGTCACGGACTCTGCTCACCGAAGCACGTATTCAGGTTTGGTTTCAAAATCGAAGGGCGAAATATCGCAAACAACGAAGGAAACTAATTTCTGAAAATGAGACGGAAACCGAAGGAAGTAAGACGTTTGTTTCGCCAGAAACAAGATCAGCATGCGTATCTTTACCTCACCGTACAAATTTGCCAGA…
Slc6a11/12/13	KH.L167.5	SLC6A11	SLC6A11; SLC6A12; SLC6A13	Cirobu.g00011713	8.01054	1.26685	0.00221099	-0.829328	0.0438635	0	https://www.aniseed.cnrs.fr/aniseed/gene/show_expression?unique_id=Cirobu.g00011713	https://www.aniseed.cnrs.fr/aniseed/gene/show_gene?unique_id=Cirobu.g00011713	http://ghost.zool.kyoto-u.ac.jp/cgi-bin/fordetailkh21.cgi?name=KH.L167.5;source=kh2013	Other CNS	RT-PCR	1000	AACCGGATATGACGCGATTATCTGACGTGCAGGTATGGCTGGACGCTGCCACACAGGTGTTTTATTCATACGCCCTCTGTAAAGGAATGTTGATCACTATGGGAAGCTACAACAACTATCGTTATAATAGTTACAGAGATTGCATCGCGTTGTCGGTTCTAAACAGCGGGGTGAGTTTCGTGTCAGGGTTCGCTATCTTCGCCATACTTGGCTTCATGGCGAAGGAACAGGGAGTTGATATTAAACACGTTGCGGAGTCGGGACCCGGTCTTGCATTCATAGCTTACCCCAAGGCACTAACATTGCTACCGATGCCTCAGTTCTGGGGGTGTTTGTTCTTCTTTATGTTATTTCTATTGGGATTGGACAGCGAGTTCGTAGGTCAGGAAACATTGATGT…
Syt9	KH.C9.478	SYT9	SYT2; SYT5; SYT9	Cirobu.g00010027	6.07216	1.76157	0.0125988	-0.696459	0.316107	3	https://www.aniseed.cnrs.fr/aniseed/gene/show_expression?unique_id=Cirobu.g00010027	https://www.aniseed.cnrs.fr/aniseed/gene/show_gene?unique_id=Cirobu.g00010027	http://ghost.zool.kyoto-u.ac.jp/cgi-bin/fordetailkh21.cgi?name=KH.C9.478;source=kh2013	Other CNS	Twist BioScience	500	CAATGGCGACCTAGAAGTATTGAACGTTAAACTTATCCAGGCCCGGAATCTTGCCACTCAAGATTTCAGCGGAACTTCCGACCCTTACTGTACCGTTGCACTGGTGCCCGGGTTCAATCCACGGAGGAGCAAAGTTCATAAAAAGACATCGAACCCGGAATTTGGAGAAAGCTTTGTCTTTAGTGTTTCAAGCGACAATTTGGAGGATAAAGTGCTTCAGGTGAAAACGTACGATTTCGACCAGTTTTCCAGAGACGAATGCACTGGTGTTATGGAACTTAACCTAAAAGAAATTGATTTTGTGATGACACCCAACATTGACCTCTGGCGGAAAATGAAATTTCCCGACGACCACGAAACCAGCGAAACGTTCGGAGACTTAATGCTTGCCTTGTCATA…
Asparaginase-like	KH.L144.5	ASRGL1	AGA; ASRGL1; TASP1	Cirobu.g00011275	5.45497	2.00973	1.35e-05	-1.3363	0.00399922	0	https://www.aniseed.cnrs.fr/aniseed/gene/show_expression?unique_id=Cirobu.g00011275	https://www.aniseed.cnrs.fr/aniseed/gene/show_gene?unique_id=Cirobu.g00011275	http://ghost.zool.kyoto-u.ac.jp/cgi-bin/fordetailkh21.cgi?name=KH.L144.5;source=kh2013	Other tissues	RT-PCR	984	AGGGGTGGTCAGCCTTAAACTTATCAAGAACCCGATTGAGGCGGCCAAGCTAGTCCTATATGAGAGCCATCATTGTCTCCTGGACGGCCCGGCGTCGCTAAAGATGGCTCGGGAGCACAACCTAGCGGAAGAATCCCCAGAGTATTTTGTCACGGAAGAATGCAGGGAAAATTGGAAAAATAAATCAGCATACAAAAATGTCATCAAGGATTTCTTCAGCAGCGAAGACGGGCACGACACGGTTGGAGCAGTTGCGCTCGATGTACATGGCAACCTTGCATGCGCCACTTCAACAGGGGGTATCGCATCACAACTACCAGGCAGGGTCTCCGATTCCCCTTTATCGGGCTGTGGGGGCTTCGCGGATAACGAATCCGCCGCTGTATCAACGACCGGTCA…
Brsk	KH.C11.383	BRSK1/2	BRSK1; BRSK2; SIK3	Cirobu.g00002212	6.59799	1.55931	2.32e-05	-1.05847	0.00392818	14	https://www.aniseed.cnrs.fr/aniseed/gene/show_expression?unique_id=Cirobu.g00002212	https://www.aniseed.cnrs.fr/aniseed/gene/show_gene?unique_id=Cirobu.g00002212	http://ghost.zool.kyoto-u.ac.jp/cgi-bin/fordetailkh21.cgi?name=KH.C11.383;source=kh2013	Other tissues	RT-PCR	819	CAGTGCGACAAGGAAGAACAACACTGTCCACCAAAGTTTACATTTTGATAGATCACGCAGTTTGACGGGTGAACGTGACTCACACATGACATCCAGTGGTAGCAGCACCAATATCTCCTCTCATCACCCACAAAACCAATCAACCACGACCGGGTCAAATCAGCCCCCAGTTCAAGCGATCTCAGGTTCGCAAACCCCAACCCCCCCAAGCTCACCCAGTAACCCATGGCGACAGCGGCTAAACAGCATCAAGAACAGTTTCATTGGTTCTCCGCGTTTCCACAGAAGAAAAATGCATGATCCTGATCCAGAATTAGAATATTTAACATTAAATCTCCCCAACAGGTTAACGAAGCGTTCATGGTTCGGCCAGTTCATCAGCGGTTCTTCTTCCAATGT…
Calm-rel	KH.C1.1276	KH2013:KH.C1.1276_CALM1/2	CALM1; CALM3; CALML3	Cirobu.g00000306	2.64784	2.332	0.0214469	-0.416374	0.68752	0	https://www.aniseed.cnrs.fr/aniseed/gene/show_expression?unique_id=Cirobu.g00000306	https://www.aniseed.cnrs.fr/aniseed/gene/show_gene?unique_id=Cirobu.g00000306	http://ghost.zool.kyoto-u.ac.jp/cgi-bin/fordetailkh21.cgi?name=KH.C1.1276;source=kh2013	Other tissues	Twist BioScience	500	GGATCAGACTGATCATATCTTCTATGTTGGAGTTGTATAAGCAAGCCACCATGAACTACAATAGATCAACAAGGCGAAGTAATAGCGTTCATGTAATTGACTTCATGGAGTGGGTAATGGGAGACATGCCCTGGCAAGGACAACATCGTTCAAGATCAAGTGCATCCGGCCCACCTTCGGGCAGAAGAAGGAATTATCCAAATGTTGTGTCGGGTCAGAAACGATTAGAAATGGACACAAGGAGTCACACATTCTCAAAGGAAAGACTTGACGAGTTTCGACAAATCTTTGAGTTTTACGACGTGGATAACAACAGGATTATGGACATGGGGGACCTGGACGTGGCGTTACGAGCCTTGGGTTTTAGTCCAAGCGAATCCGAGGTTGAAGATGTGATCG…
Claudin-rel	KH.S1269.1	KH2013:KH.S1269.1	CLDN1; CLDN18; CLDN19	Cirobu.g00013760	3.86291	1.05545	0.0382006	-0.0175266	0.986814	0	https://www.aniseed.cnrs.fr/aniseed/gene/show_expression?unique_id=Cirobu.g00013760	https://www.aniseed.cnrs.fr/aniseed/gene/show_gene?unique_id=Cirobu.g00013760	http://ghost.zool.kyoto-u.ac.jp/cgi-bin/fordetailkh21.cgi?name=KH.S1269.1;source=kh2013	Other tissues	Twist BioScience	500	GTTGGGTATTTTCCTTGGGGTGTTGTGGCGCTACTATTGGTGTCACTTTGTCGCATAAATGGAAGAAGAATACTGTGGAAGGAATTCATCATTCAGTGTTAGATTCTGTGTCAAATGTCGCAGGGCTTTGGGACTTTTGCCAGGTTTTTCCTTCAGGCCAAACTCAGTGTTGGCCGATTGCCGCTACATCTGTTCCAGCGCTTCTACTTTTCTGTCGCATTCTGATGATATTTGGCATACTGTTGGGGTGCGTGGCTGGATTTTTGACAATCTGTTCCTTCAAATGCACAACTCTTGGACCAGAAGCACGACACGCGAGAGAAAAACTTTCCTTGTATTGTGGGTTGATGAACTTGTTGTCGGGAATCTGCGTCGTGGTAGCGACCTCTAGCTACATTT…
Hh.a	KH.C8.359	IHH	DHH; IHH; SHH	Cirobu.g00008984	2.73974	1.98734	0.00268847	-1.9338	0.00780959	14	https://www.aniseed.cnrs.fr/aniseed/gene/show_expression?unique_id=Cirobu.g00008984	https://www.aniseed.cnrs.fr/aniseed/gene/show_gene?unique_id=Cirobu.g00008984	http://ghost.zool.kyoto-u.ac.jp/cgi-bin/fordetailkh21.cgi?name=KH.C8.359;source=kh2013	Other tissues	RT-PCR	782	ATGAGGATCGCTTCATGACCCCGATATGCAGAGCTAGACTGGACTACCTTGCAATCCTCGTAGCGAACCAATGGGCGCGTGTCAAACTGAAAGTTCTCGAAGCATGGGACGATGGGAACGATAAAGCCAACGACCCTTTGCATTATGAAGGTCGAGCCGTTGATATAACGACTGATGATGCAGACAGAAATAAATATCCGATTCTTGCTCGGCTTGCAGTTGTGGCAGGGTTCGATTGGGTAAAATATGACGGAAAGGTCGTCCACTGCTCCGTCAAGTCTGAGGAATCGGACGCAGCGAAATATGGAGGATGCTTTCCTGGTGAGTCAACCGTGATCGTTCCTGGTGAAGGACATGTCCCAATCTCCAGTCTGCAACCTGGAGACCAAGTGCTTGCTA…
KH.C12.124	KH.C12.124	KH2013:KH.C12.124	KH.C12.124	Cirobu.g00002650	1.96958	1.8921	0.00517651	-4.37172	3.96e-06	0	https://www.aniseed.cnrs.fr/aniseed/gene/show_expression?unique_id=Cirobu.g00002650	https://www.aniseed.cnrs.fr/aniseed/gene/show_gene?unique_id=Cirobu.g00002650	http://ghost.zool.kyoto-u.ac.jp/cgi-bin/fordetailkh21.cgi?name=KH.C12.124;source=kh2013	Other tissues	RT-PCR	998	ACCTCTTTGCATTGGTTTGCATCGTAAGCAACTTCAAACGACTTCGACAGCGGATGTATATCTTCATTATCAACCTTACCATTGTTGACGTCATAGTGGGGGTCGCGTATATGATCGACGTCGTGACCAAGATCCTTCGAAGCGAAGCCTCTGTGACGTCACAATCTGAGGGTTTTGGAGCGACAGCGGCGACGGAAGGCTTGAAAATTGCGTCAATTCTCCTCTCGGCTTTGAACACCAGCGTCGTGACGTACGCCCTACATAAGCGGACCACAAGTATGGGGCGCCACCGTGCGGAGTCCCTTAACAACGACACAACGGGGAATCCCCTACACATCCCTGCCTTCGACACGATGCTACGTGTGTTGTCGCTTGGCACTCAGACACCCAGCGCCAATC…
KH.C2.539	KH.C2.539	KH2013:KH.C2.539	KH.C2.539	Cirobu.g00004747	0.943919	2.77149	0.0228336	-6.55483	0.00382418	0	https://www.aniseed.cnrs.fr/aniseed/gene/show_expression?unique_id=Cirobu.g00004747	https://www.aniseed.cnrs.fr/aniseed/gene/show_gene?unique_id=Cirobu.g00004747	http://ghost.zool.kyoto-u.ac.jp/cgi-bin/fordetailkh21.cgi?name=KH.C2.539;source=kh2013	Other tissues	Twist BioScience	500	TAAGTTTTCGATATTAGAAGATTCGTTCTGCTGAGAAGGTACTTAGCGTTATAGAAGGAAAGAATTCGTCGAGTTAGTAATCGAAATGTCGATAAATTCAGGCTGTGGTTAGTCTTAACAAAATACCATTTGAAAGGAGTTCTGAAATTAAATTTAAATAGCTGGGTAGTCGAGAAAGACACGGTTGTGAGTTCAATCCGTCTTTCCTCTTAATAATTTATCGCGTAAGACATTGTAATGTGTCGCATTCCGACGTGTTAAGATAGTGGTCAGGTGTATTAGATTTTCAAGCTACGTCATCTGGTGCTCATGTCGCGCAAGGACGTATGCTTTTCCGGAAGCGTGTGCTTTCTGTTGTTGATTTTAGCAAAACAGTTTGCTCAGGTTTTAATTCGCTTT…
KH.C7.615	KH.C7.615	KH2013:KH.C7.615	KH.C7.615	Cirobu.g00008479	3.86899	1.49455	0.0130537	-1.64078	0.00739517	0	https://www.aniseed.cnrs.fr/aniseed/gene/show_expression?unique_id=Cirobu.g00008479	https://www.aniseed.cnrs.fr/aniseed/gene/show_gene?unique_id=Cirobu.g00008479	http://ghost.zool.kyoto-u.ac.jp/cgi-bin/fordetailkh21.cgi?name=KH.C7.615;source=kh2013	Other tissues	RT-PCR	982	GCGCGGCTTAATGGTATAGTACTGTGGGGTCAAGATGAATACCGTTAGCACATAATGTCCCCTATTTTACAACCATACTATGTAATTCTGTAAATATTCTCTGTTTACTACCAAATGGAACGAGAAAAAAACACGAAAACATGTACCATCTTACCCCAACCTACTATAGATGTTACGCAATCGCATACCCGTTCAATCACTGGTTAAATTAAAAAAACAACGATTTGTAACAGGCTTTGGTCCCATCGATCTGCGCACATGAATTACAATAATCGAAAAGTCGATGAAACACCCCACTATTCTTATGTATACGAAACGTCGGCCCTTCCCTTTGTTAAGGACAATCGTTAGGTGCGAGACCAGCCAGTAACGCCGCTAGAATCACAGTCTGCAATCGAT…
KH.C8.471	KH.C8.471	KH2013:KH.C8.471	KH.C8.471	Cirobu.g00009109	1.91838	4.14047	0.000102957	2.51093	0.0143128	0	https://www.aniseed.cnrs.fr/aniseed/gene/show_expression?unique_id=Cirobu.g00009109	https://www.aniseed.cnrs.fr/aniseed/gene/show_gene?unique_id=Cirobu.g00009109	http://ghost.zool.kyoto-u.ac.jp/cgi-bin/fordetailkh21.cgi?name=KH.C8.471;source=kh2013	Other tissues	Twist BioScience	500	ATGATTTACAAAAGACACGATGCGGTTCAGATGCAAGCGATAGATATCGTTTCGCCGACCGAGTCGAAGGAAATTAAAAATACTTCGGAAAGTTTGAGAAAGAAACCTACCAGTAGTTCCCATAAGTTGCAGTCTAGTCCAGTACAGCACGACGGCAAAGTGTTGAACGTCGACTTGGCTACTGTACTTGCATTGCAGCAGGAAAGAAATGAGGTTTCAAGACGTAGTGACAGACCAAAAAGAAACCATCATTCGTTTGCCCAGTTAAACATGTTTACTCGTCATACTGTACCGTCGAATGACTTCTTCTTTGACATAGCGGACCTTTCGGAGAAACTGCGAAACGCGGAGCTTTCGGAAAGAAGCAAACGTTTAAGAGAGCGAGAAAAAGAAGCACTT…
KH.S2542.2	KH.S2542.2	KH2013:KH.S2542.2	KH.S2542.2	Cirobu.g00014267	1.58792	3.32833	0.000192155	0.157474	0.894138	0	https://www.aniseed.cnrs.fr/aniseed/gene/show_expression?unique_id=Cirobu.g00014267	https://www.aniseed.cnrs.fr/aniseed/gene/show_gene?unique_id=Cirobu.g00014267	http://ghost.zool.kyoto-u.ac.jp/cgi-bin/fordetailkh21.cgi?name=KH.S2542.2;source=kh2013	Other tissues	Twist BioScience	500	CCAGGTCATAAGCAAGCAGAGTGCCCTGCCAGAACGAAGGACTGCCCTTTATTCTCACAACAAGCCGAAGGCAAGAACGATAAGAGGAATAGTACAACTCAGAAAGCAACCGAAACCACAAAGATAACGAGAACTGCCAGAAGCTCAAAGCGCCCTCTAACAAGCCCAGAACCCTCACGTCCTAGATCCAAGTCGACTCTAAATGAGACTAGTTGCGAAGAAAGTCTTCTGCCCCGGGTGTAATCGCAAGGGCCGCCTTCAACCAGACTGCGAAACGTTTTACGGTTTCGCCTGCACGACTGACTTCAAGGCTGAGAAGACATGTTGCTCAACCACCGAGCGTTTTCTCGTCAACTCAACGTCAACAAAGACGCCGTGTGCACTGTGCAAGGAGTTATT…
KH.S433.2	KH.S433.2	KH2013:KH.S433.2	KH.S433.2	Cirobu.g00014511	1.29166	1.39705	0.156163	-2.13277	0.044809	0	https://www.aniseed.cnrs.fr/aniseed/gene/show_expression?unique_id=Cirobu.g00014511	https://www.aniseed.cnrs.fr/aniseed/gene/show_gene?unique_id=Cirobu.g00014511	http://ghost.zool.kyoto-u.ac.jp/cgi-bin/fordetailkh21.cgi?name=KH.S433.2;source=kh2013	Other tissues	RT-PCR	997	GTGGTGTGGCTGAATGACACAGTGTTTCTGTCACAGAAGGACTCATTTTTTTATATAAAATTCTGCAAACCAAATACATTTTTTAGTATCAAAAACAATCCACTTAAGATACAAATACCTATTTGCTGCAATACAGTTTTAAATAAATGAACAATGGCTAATCTTTTTTAATAAACTGCATTGAAGGGTTTAATCTTAAGATACCTTTAACACAAGAATTCCACAGTTGTTGCCATCTTCCTGATTCTCATAAGGTGAAGATACAACCCTCCACTTTTGAGATGAAGAGGGTAAATGATGTCGCCAGAAACCTCTAAAACAAAAAACATTGTATTCCCGTTATGTTGGGTATAAATGTAATGCTCACTTCCAGTTTTTCAACTGTTTTCTATGATAGCT…
Osbpl	KH.C1.70	OSBPL5/8	OSBPL11; OSBPL5; OSBPL8	Cirobu.g00000964	7.22935	0.922873	0.011947	-1.02481	0.0054535	4	https://www.aniseed.cnrs.fr/aniseed/gene/show_expression?unique_id=Cirobu.g00000964	https://www.aniseed.cnrs.fr/aniseed/gene/show_gene?unique_id=Cirobu.g00000964	http://ghost.zool.kyoto-u.ac.jp/cgi-bin/fordetailkh21.cgi?name=KH.C1.70;source=kh2013	Other tissues	Twist BioScience	500	CGAGAAATAACAACAGCTATCTCAGAGTTGTTAATACCAATTGCACAAAATCAGAAAGAAATCCTTGCATGTTTGGAAAAATTAAAACAGCAAATGCAACTTGTAGCAGTGAACAGCAGAGATAACCATTCTCTTCCTTGGAATACAATATTGATTTGTTTCTTCATGAGTCTCGTTTTGTATTTCCTAATGGGATACCCAATTAATTAGTTCAACTACCATGTAATCAGATGCATACCTGATTAAAACTGTCAATCAACTGACTATAAACAATATGTTGCTGCCACATTTTGTGCAAAAATACCTAATTATTCTGTAATGTGCATCCCTAACTGTGTAATATATATTTATAGAATCGAGTGCAAACTTAAACTGCTGCATGTGTGGGTTAGTGCAATT…
Slc16a7	KH.C9.103	SLC16A12/7	SLC16A12; SLC16A14; SLC16A7	Cirobu.g00009617	5.71048	1.19194	0.0040053	-0.855854	0.0400826	0	https://www.aniseed.cnrs.fr/aniseed/gene/show_expression?unique_id=Cirobu.g00009617	https://www.aniseed.cnrs.fr/aniseed/gene/show_gene?unique_id=Cirobu.g00009617	http://ghost.zool.kyoto-u.ac.jp/cgi-bin/fordetailkh21.cgi?name=KH.C9.103;source=kh2013	Other tissues	RT-PCR	929	GTTCACCATTGGGTTCGTTCATAATTTGCCCCATGAACAAATGGCTTGTGAACCAATATGGAATTCATGGATATTATTTAATAATGGGAGGCGTATATTTCAATCTGTGCATTGTCGGTGCTCTAATGAGACCTATCGAACTATCGTTACGTTTGGCCAAGCGACGTCCTCAGATTGAGAGCGAAGACGATTCAAAAGCTCACGAAACTGAGTCAGTTGATTTAAATATAAACCATTCCTCCGACGTCGAAGTAAAAGCTACCATAAAAAAAACCGAGAGTTCGTTTAAACAGCTGATTAAAAACAAACCCTTTCTCGTACTGGTTCTGTCGCAAATAATTTTGATGACAGGATATTCTACTTTCCAGTTATACATTGCACCGTATGCCGAGTTACAGG…
Slc22a4/5	KH.C1.106	KH2013:KH.C1.106_QDR1/2/3	SLC22A1; SLC22A4; SLC22A5	Cirobu.g00000069	2.50907	4.36468	0.00944137	0.83959	0.60496	0	https://www.aniseed.cnrs.fr/aniseed/gene/show_expression?unique_id=Cirobu.g00000069	https://www.aniseed.cnrs.fr/aniseed/gene/show_gene?unique_id=Cirobu.g00000069	http://ghost.zool.kyoto-u.ac.jp/cgi-bin/fordetailkh21.cgi?name=KH.C1.106;source=kh2013	Other tissues	Twist BioScience	500	GAGATCCCTGCACTCATCACCACGTATTTTACACTACAGAAGATAGGCCGCGTCTTGCCACTCTCGGTTTTTTTTATCATTGCTAGTCTCCTGTACGGCAGTATACCGCTATTGATGCAAGTTAATCAAACTGCTGTGTTAGTTGCCGCGATGATAAGCAAGTTTCTAGTAACCATTATCTTTCTGTTGATCTACATTTACACTTGTGAACTTTTCCCTACAATGATGCGCCACAAGAGTCTCGGTGCTGCTTCCACAATAGCCAGACTTGGAGGAATGGTGATGCCTTATCTCTTCTATGCGGGCGAGAAGGTTCACTTTAGCTTCCCCTACATCGTGATGTGTGTCATCGGTGTTTTAACTGGAGTATCCGCCATGTGTATGCCTGAAACTTTGAAT…
Stathmin2	KH.L68.2	KH2013:KH.L68.2	STMN1; STMN2; STMN3	Cirobu.g00012957	3.28215	1.17921	0.0366259	-1.1365	0.0481446	0	https://www.aniseed.cnrs.fr/aniseed/gene/show_expression?unique_id=Cirobu.g00012957	https://www.aniseed.cnrs.fr/aniseed/gene/show_gene?unique_id=Cirobu.g00012957	http://ghost.zool.kyoto-u.ac.jp/cgi-bin/fordetailkh21.cgi?name=KH.L68.2;source=kh2013	Other tissues	RT-PCR	867	GGGGAGGCTTTCGAAGTTATTCTCAAGCTTCCGGGGCAAAATGGGGATGGAGTGGCGAGCCCGTTGAAATCATTAACGCCAAAGAAAGAAGTTTCGATGGATGAGATCAAGATGAAACTGCAAGCTGCAGAGGAGCGTCGAAAAGCTGTGCAAGAGGCTAAAGTGACGCAACAAAAAGCGGAAGAAGAAAAGATCTTGAAAGCAAAGCAGAAGAAAGCCGAAGTTAATGATTCATTCAGTCAGTGGGCAGAGCAGCATCTGAAGAAACAAATGTGTCAATATCAGGAGAACCATATTGCGCAGTTGGAGGCGAAAATCAAGAAGTTTAAAGCTTTGAACATGAAGCCTGAAGAGATGAAAGAAAAGGTACAGCGTGAAGTGGATGAAATGTGCGCTCAA…
Akr1b	KH.C8.448	AKR1B1/10/15/7/8	AKR1A1; AKR1B1; AKR1B10	Cirobu.g00009083	1.66362	1.77681	0.0788385	-2.83549	0.00981215	0	https://www.aniseed.cnrs.fr/aniseed/gene/show_expression?unique_id=Cirobu.g00009083	https://www.aniseed.cnrs.fr/aniseed/gene/show_gene?unique_id=Cirobu.g00009083	http://ghost.zool.kyoto-u.ac.jp/cgi-bin/fordetailkh21.cgi?name=KH.C8.448;source=kh2013	Unclear	RT-PCR	997	GGCAGACACCAAAGGAAGAAATCAAAAAGTGTGTTGAACTCGCCATCGATGAGGGTTATCGTCATATAGACGGTGCTTGGGTTTATCAAAACGAAGAAGGAATCGGAGAGGCAGTTGAAGCAAAGATTAAAGAAGGAATAATAAAACGTGAAGATATTTTCATTACGAGTAAGCTTTGGAGCACATTTCACGAGGCTGATGACGTCAGAGAATCTCTCCTTGAAACACTTAGCTTGTTGAAAACTGATTACGTTGACTTGTACCTTATGCACTGGCCATGGTCTATGAAGAAAGTTGGAAAAGAGATTTTACCGAAGGACGAAAACGGCAAATTCCTCTACACCGATGTGGATTACGTAGATGCTTGGAAGGCCATGGAGTCCGTGTGCAAAGAAGGTT…
Amt1	KH.C2.456	KH2013:KH.C2.456_MEP1/2/3	KH.C2.456	Cirobu.g00004655	4.47397	1.3768	0.286913	-3.01065	0.0280804	5	https://www.aniseed.cnrs.fr/aniseed/gene/show_expression?unique_id=Cirobu.g00004655	https://www.aniseed.cnrs.fr/aniseed/gene/show_gene?unique_id=Cirobu.g00004655	http://ghost.zool.kyoto-u.ac.jp/cgi-bin/fordetailkh21.cgi?name=KH.C2.456;source=kh2013	Unclear	RT-PCR	1001	GTTCGCTTTTCTGGAAGCAGGATCAGTAAGAAGTAGTAACACAGTCAATATTCTTATGAAGAACACACTTGACGTTTTCGTTGGTTCTTTATCATTTTTCGCGTTCGGTTATCCATTTGCATATGGTCGTCCGGGCAACTCGTTCATCGGCCACAACAACTTTTTCGGGGCAAATGTGCAATACTTTGAGAAATCGGTCATAGCAAACAACCAAACTTTGGGCGGATATGAAACCAGTAGTTCGTATTTTGCAAACTTTTTTTTCCAATATGTGTTTGCGGCCACTGCAGCGACTGTGGTATCGGGCGCTGTGGCGGAAAGGGCCGACTTCTCATGTTATATAATCTACAGCTTCACTATTACAGGGTTTATATATCCAGTAGGTGCGCACTGGGTTTG…
Slc49a3	KH.C3.535	KH2013:KH.C3.535_MFSD7	FLVCR1; FLVCR2; SLC49A3	Cirobu.g00005722	2.8929	3.10099	0.000565235	-0.18364	0.854006	0	https://www.aniseed.cnrs.fr/aniseed/gene/show_expression?unique_id=Cirobu.g00005722	https://www.aniseed.cnrs.fr/aniseed/gene/show_gene?unique_id=Cirobu.g00005722	http://ghost.zool.kyoto-u.ac.jp/cgi-bin/fordetailkh21.cgi?name=KH.C3.535;source=kh2013	Unclear	Twist BioScience	500	TATGACTCAAAATGTCATTACGTAAGCGATGAAGTAAACTTAAAATACACGAAATCTTTTTTAGTTTCTGTGTACGTGTGCACGGCCTACATTGGGATTCTATGCATCGCCCTTCTTGGGTTCTTCCGACCTAAATACCACCGTATGAAAGCAGAACAACATGCTATAAGTGACAACATTTCGCAATGTAGTACCAGCAATATAACTGCCGTGTAAAAATACAGTAGGGTGGGGAAAGATGGGACACCTTATCTTTGGGACACCTTATATATCGTCACATTTGGTAGTAGAAAATAGAAACAAAGAATTATAAAGCTGTATCCTCACTCTTCTCATAGACCATAGACCGTTGTTAATTGTTTACAAGATATTATGTGCCAAAGATGTCCCATCTTACCC…
Cplx2	KH.C8.717	CPLX1/2	CPLX1; CPLX2	Cirobu.g00009378	5.83341	2.75752	1.42e-05	-0.785434	0.192078	11	https://www.aniseed.cnrs.fr/aniseed/gene/show_expression?unique_id=Cirobu.g00009378	https://www.aniseed.cnrs.fr/aniseed/gene/show_gene?unique_id=Cirobu.g00009378	http://ghost.zool.kyoto-u.ac.jp/cgi-bin/fordetailkh21.cgi?name=KH.C8.717;source=kh2013	Unclear	Twist BioScience	500	TTCTTTGTTTAGTGTACGAACATATAAAGCTGTCATGGATTTCATAGTGAAGCAAGCACTCGGAGGAGCAACAAAAGATCTCAACAAAATGATGGACAAGGGAGGAGAGGAGGCGGATCCGAAGGCAGAGGAGGCTCAGAAGGAGCAGTTAGAGGCAATGGCGGAGCAGGAGGCGGAGAGAAAGGCGAAACACACGAAGATGGAAGCAGAAAGAGAAAAAGAGAGACAGAGAATTAGAGACAAATATGGTTTAAAGAGGAAAGACGAAATTGAAGCGGAAGAGAAAGCGAACCGGGAGAGGGAGACAGTTGGGAGGTTGGGGAGGAAACAAACGTTCGAGGAGGAGCAAGAGGAGGAGGAAGAGGAGAGTGTCCTCAGCCAAGCCGAAAAAACCTTTAG…
Cxcr4-related	KH.C6.184	KH2013:KH.C6.184_RXFP3	CXCR4; RXFP3	Cirobu.g00007707	2.43843	2.45513	0.00221094	-2.26268	0.0127852	2	https://www.aniseed.cnrs.fr/aniseed/gene/show_expression?unique_id=Cirobu.g00007707	https://www.aniseed.cnrs.fr/aniseed/gene/show_gene?unique_id=Cirobu.g00007707	http://ghost.zool.kyoto-u.ac.jp/cgi-bin/fordetailkh21.cgi?name=KH.C6.184;source=kh2013	Unclear	Twist BioScience	500	CACGGTATTTGCTGTGATCGCTGCGTTCGTGATCTGCTGGCTTCCAAACCACGTGACCTCTATAATACACGCGCTAACATTGGGGGAAAATGAAGAAAAACGGAAAGACCTTCACACTTATGAACTCAACTTGATTTCGAATTGTTTAGTCGCGTTTAATAGCTGCATAAACCCAATCTTATACGCCTGGCTGAACAAAAGGTTCAGGGACCAGCTTAAAATGATCAAGTGCTGCAGTGGTCGAATGACGAAACTGAGCGTTGGGACTCGGAATAAAAGGAATTACAATATGAGGCTTCCTGTAGAACAGCACGACCAAAACCAAGTTGAAAACGAGGGCAACCAAACGCCTCAAAATGGTAGAACAAACGTAACGCTCTTGCAGGACGGTGGACAATC…
Daam	KH.C3.619	FMNL2A	DAAM1; DAAM2; FMNL1	Cirobu.g00005813	4.80873	2.65582	8.91e-05	-1.85571	0.00585603	0	https://www.aniseed.cnrs.fr/aniseed/gene/show_expression?unique_id=Cirobu.g00005813	https://www.aniseed.cnrs.fr/aniseed/gene/show_gene?unique_id=Cirobu.g00005813	http://ghost.zool.kyoto-u.ac.jp/cgi-bin/fordetailkh21.cgi?name=KH.C3.619;source=kh2013	Unclear	RT-PCR	894	TTCTTGGATCGGAAAACTGCTCAGAATCTTGGCATCTTCCTCGCTGGATTTAAACTCAGGGGAGATGAAATGATGAGAAGAGTGAATATCATCTCGGAAGATGAAGGAGGAATCTCTACCGAACATCTTCTTGGATTGTACAAATTTTGTCCGGAACCTGAACTGAAAACTTTGTATGAAAAAGAAATGGAAAGAAAAGAAGAATTTTCAAAGGAGGATCGGTTTATGATGGAGCTTTGTCAGATTCCGAGGTTAAATGTACGGCTTGAGATTGCCACAATAACCAGGGAACTTCCACAAGAGATAGAAGATTTACAGCCAGCAGTAGATCATGCCTTAGATTCTCTCAATGAAGTTATGAACAGCAAGTATTTGGAAAGATTGCTTGCTTACATATTA…
Dpp6	KH.C9.65	DPP10/6	DPP10; DPP6	Cirobu.g00010217	6.43989	2.93494	0.00922157	-1.63844	0.128548	3	https://www.aniseed.cnrs.fr/aniseed/gene/show_expression?unique_id=Cirobu.g00010217	https://www.aniseed.cnrs.fr/aniseed/gene/show_gene?unique_id=Cirobu.g00010217	http://ghost.zool.kyoto-u.ac.jp/cgi-bin/fordetailkh21.cgi?name=KH.C9.65;source=kh2013	Unclear	Twist BioScience	500	AGTGTCAGCAGATCTTAAATATGCTCTCCTTGCTTTTAACGAGAAGAAAATCTACTCGGCATCATATAATGCATCGTACTTTATATACAACATAGAAACGAGGTCTCGTGAGCCACTTGTCCATGAGTCACGTGATGTGTTCCAGTTCGCTGGTTTCGGTCCCAACGCAAGCCAGATGATATACGTCATCGATGGTGACGTTTATTACAAGCCAAGCGTTGCTGGAGATGCAATACGACTCACTAGGGACGGAGTATACGGAGTCGTTATTAACGGATTGACCGATTGGCTTTACGAAGACGAGATTTTTGGCACAAACGTTGCCCATTGGTTTTCACCGAATGGTCGATACTTGGCTTACGCGAGGTTTGACGATACCAACGTTGCTGATGGTTACGT…
Galr	KH.C5.117	F1NVL8_CHICK	AGTR1; GALR2; OPRM1	Cirobu.g00006976	5.72261	2.89558	0.00248973	-1.1789	0.194916	0	https://www.aniseed.cnrs.fr/aniseed/gene/show_expression?unique_id=Cirobu.g00006976	https://www.aniseed.cnrs.fr/aniseed/gene/show_gene?unique_id=Cirobu.g00006976	http://ghost.zool.kyoto-u.ac.jp/cgi-bin/fordetailkh21.cgi?name=KH.C5.117;source=kh2013	Unclear	Twist BioScience	500	ATGTGTATCTTATCGCCGCCAGATCACTTTGAAAATGTGGTCGTCCCATCAATCTACATTGTCATCTGCATCGTCGGTCTTCTCGGCAACGGAGTAGTCCTTGGCCTTTTACTCAGACCAGATCATAGTCATATACATGGCAATAAACCATCTGTGACCAACATACTGGTTATCAATTTGGCGTTAGCTGACTTTATTTTTGTAGGGGCGCTTCCATTTTGGATTACTGAGAGATTTCTGCGTGGAAGTTGGATTTTTGGAAACTTTGGATGTAAGTTTCTAAGTTTTATTTCCCTGCTGAATTTGTATGGGAGCGTCTTCTTCCTCGTGGCAATGGGAATTGACCGGTACTTGGCAGTCGTCTTCGCAGTCCGTGCAAGGAATTACCGAACACCTAGG…
Gelsolin	KH.C3.549	GEL	AVIL; GSN; SCIN	Cirobu.g00005737	4.92022	2.0387	3.13e-05	-1.09496	0.0245063	0	https://www.aniseed.cnrs.fr/aniseed/gene/show_expression?unique_id=Cirobu.g00005737	https://www.aniseed.cnrs.fr/aniseed/gene/show_gene?unique_id=Cirobu.g00005737	http://ghost.zool.kyoto-u.ac.jp/cgi-bin/fordetailkh21.cgi?name=KH.C3.549;source=kh2013	Unclear	RT-PCR	1003	AGGCAGGAAGCAATGAAGAACGCATCGGAGTTTATCAAACAGGAAGGTCTACCAAGTCATGCCAATATCACAGTAATGTCACAATTCTCGGAGACGCCACTTTTCAAAATGATGTTTGACGATTGGCAAGCAATCAACGCACAGAAGGGACTTGGTGAGATTTGGTCGATGAATAAGATTGCTAAAGTAGCGAAGGTAGACTTCGATGCTAGTACCCTCCACATAAGACCAGATCTTGCTGCGAAACACCAACTTCCTGATAATGGAAGCGGGGAAGTAAAGATTTGGCGTGTTGAAGGCAGTGATAAAGCGCTTGTACCAAAAAGCACACATGGCCAATTCTACGGAGGAGATTGCTACATTGTCCTTTATTCCTACCAACCTCGTGGTCGACAAGAA…
Gng	KH.L170.96	GNG2/8	GNG2; GNG4; GNG8	Cirobu.g00011835	5.74128	2.55257	4.44e-05	-1.62424	0.00764652	0	https://www.aniseed.cnrs.fr/aniseed/gene/show_expression?unique_id=Cirobu.g00011835	https://www.aniseed.cnrs.fr/aniseed/gene/show_gene?unique_id=Cirobu.g00011835	http://ghost.zool.kyoto-u.ac.jp/cgi-bin/fordetailkh21.cgi?name=KH.L170.96;source=kh2013	Unclear	RT-PCR	824	CGAACACGACGTGCTTAGAACAAGCGATATCTGCCGTGAATTAATTGATTTCTGCCAGTCCCATGCACACGAGGATTATCTATATCATAGATCAGGTTCTAATCCCTACAAGGAAAAAAAGAAGTACTGTTGCATTTTTTAGCCCGATATGCAAATTAAACTGATTAATATTTTAAGAAGCCGTTGAATCGCGGCCTCGCCTTTTGTTGTTTCCCTTACTATACCTTCGTAAATAACGTATATGCGGTATACATATGACTGAATTTATACAAGTTATACGTTCGTACGCATATACTTCACTGGGTTGATTTTACTTTCTAACTGAGTCTTTTATCCTATCACTTCAATTTTAATGTTTCAAAACCAAAGGCGTTTTCTTATTACATATCTTTCCGCTTA…
HCN	KH.C10.454	HCN1/2/3/4	HCN1; HCN2; HCN4	Cirobu.g00001676	4.95765	2.55103	0.000642156	-2.36866	0.001676	0	https://www.aniseed.cnrs.fr/aniseed/gene/show_expression?unique_id=Cirobu.g00001676	https://www.aniseed.cnrs.fr/aniseed/gene/show_gene?unique_id=Cirobu.g00001676	http://ghost.zool.kyoto-u.ac.jp/cgi-bin/fordetailkh21.cgi?name=KH.C10.454;source=kh2013	Unclear	Gene Collection		cilv083o06, PlateID R1CiGC44j15
Itga9-related	KH.C9.788	KH2013:KH.C9.788_ITGA6B	ITGA2; ITGA5; ITGA8	Cirobu.g00010369	1.84834	3.64281	0.000692765	0.65813	0.547945	0	https://www.aniseed.cnrs.fr/aniseed/gene/show_expression?unique_id=Cirobu.g00010369	https://www.aniseed.cnrs.fr/aniseed/gene/show_gene?unique_id=Cirobu.g00010369	http://ghost.zool.kyoto-u.ac.jp/cgi-bin/fordetailkh21.cgi?name=KH.C9.788;source=kh2013	Unclear	Twist BioScience	500	ATCGGTCCACTCATAGGGGCAATAGTTGGAGGAATTGTTCTGCTTGTTGTCATCATGCTTATAATGTGGAAGGCTGGATTTTTTGAAAGCAAGTATGCAAAAATGCAAAAAGATGCACAGCGGGAAACTGACGACCTCGACAAAACGATTGAAGTTGACGTGAACGAATAATGTGATAATAAATGCATAATTGGCTCGATTGTAGGCATAACCACAAATTCACCGAAATTCATACAAAATCCTTAATTTCAGAGTTATTTATTGAAATATAGTAAGGCATGGAAAGACGGGAAACCTTTAGCGCATATAATATCTAAATATCCTGATCGTGTTTTAAATAATTAACAACGGTCTGTTGGAGTTGTAAGGATACGGTTAAATAAATCTTTGAATGTTCTT…
KH.C1.569	KH.C1.569	KH2013:KH.C1.569	KH.C1.569	Cirobu.g00000819	2.08752	1.97728	0.241523	-2.81947	0.103688	0	https://www.aniseed.cnrs.fr/aniseed/gene/show_expression?unique_id=Cirobu.g00000819	https://www.aniseed.cnrs.fr/aniseed/gene/show_gene?unique_id=Cirobu.g00000819	http://ghost.zool.kyoto-u.ac.jp/cgi-bin/fordetailkh21.cgi?name=KH.C1.569;source=kh2013	Unclear	Twist BioScience	500	ATGACATCTGCCGCAATTTCTTCATTTGTGATGGTTTTTGTTCTCGCCTTCGTCTGTACGGCGACTTTGGCAAGATCAATTGGCCAGCAACAGCAGCAAACAGGCGGAATTCAGGAATCAGAGAGAAGCGGGAGGGCCATCAAAAGTCTTTGCGTTGATTACTACTCCCAACTCCCATACGCGCTTTGGAAACATGCATGCGGGTCACAAACAACTCTCAATCGCCGTGGATTTCAAAATAACGCGGAAGGGCCAGTAAAGAAGTCGAGCATGGAATACCAGCAGCAGCAGAGCAATAGAATGATCAATGCTCTTTACGCTCGACTCTTCGAAAAACTATCCAAGGATATGTCGGAAAACAAAAGATCCGCAGACCTTTTCGGAGCAGAAGCGCCGATG…
KH.C2.1019	KH.C2.1019	KH2013:KH.C2.1019	KH.C2.1019	Cirobu.g00004134	3.54867	0.374434	0.505274	-1.19768	0.0350705	0	https://www.aniseed.cnrs.fr/aniseed/gene/show_expression?unique_id=Cirobu.g00004134	https://www.aniseed.cnrs.fr/aniseed/gene/show_gene?unique_id=Cirobu.g00004134	http://ghost.zool.kyoto-u.ac.jp/cgi-bin/fordetailkh21.cgi?name=KH.C2.1019;source=kh2013	Unclear	RT-PCR	999	CTCCTAAGCCTTCCCCAGTTACAAATATTCTAGAATTTTCCGAGGACATTGGTTATGCGAGTATCAAGCATCCAAGTCCAGAGCACACTTTGCCAACTACTGATTTTTCAAATCTTCAATCTGCGGTGCCTGTAAGCCCAAGCGTGGATGAGGTGTTAGAAGATTTTGGATATGCGAGTGTAAGTTTTAACAATTCAACACCAACAAAGGTGGAAACACCAGAACCAGTGGAAACTGTGGTCAGTACTTCTACCAGCAATAGCCATGATAACACACCAACATCAGATGAGTTTTTGTTTAACGCACCTACCATTGATGATGTTTTGTCGTCAGAGTCTTCAGAAAACTTGGAACCAGTTTACGCAAAAGTGAACAAACCGCTGTCACCACCTAAACCAG…
KH.C2.457	KH.C2.457	KH2013:KH.C2.457	KH.C2.457	Cirobu.g00004656	6.18204	1.50899	0.0172533	-0.452718	0.471019	0	https://www.aniseed.cnrs.fr/aniseed/gene/show_expression?unique_id=Cirobu.g00004656	https://www.aniseed.cnrs.fr/aniseed/gene/show_gene?unique_id=Cirobu.g00004656	http://ghost.zool.kyoto-u.ac.jp/cgi-bin/fordetailkh21.cgi?name=KH.C2.457;source=kh2013	Unclear	Twist BioScience	500	AGCTGCTGTATACCATCTGTCTGAAAGTTGGCTGGAGAGAGGGCAAGGAATACAAGGTTTGGTATTACTGCAACAGTGACAGTTTTACGTTGTTGTGTGGCTGAGTTTAACAATGCAGAGTACTCCGGGAAACTTCAGCGGCGGTTACGAGTTAGACACCCTGCCGAATTTTCAACCTGCAAGACCGTGGTTTAATCGGGAAAAGTTCAATTTTGACTCCTGGAGCGCAGAACAACCAGACTTGATGCTCTCGGGCTTGTATAAGTTAAGCCTTGTATCAAAAATGCGCATATTTACCATCATGCTCTTCGTGATCGTGCTTCCTTCAGTTATTGTTTTTTGCATCTGTCTTTACAAGGAACGAAAACGGAAGAGGTCACTACTGATGGTTCCATTAGA…
KH.C7.540	KH.C7.540	KH2013:KH.C7.540	KH.C7.540	Cirobu.g00008397	4.05183	1.22857	0.0102696	-1.5103	0.00212503	0	https://www.aniseed.cnrs.fr/aniseed/gene/show_expression?unique_id=Cirobu.g00008397	https://www.aniseed.cnrs.fr/aniseed/gene/show_gene?unique_id=Cirobu.g00008397	http://ghost.zool.kyoto-u.ac.jp/cgi-bin/fordetailkh21.cgi?name=KH.C7.540;source=kh2013	Unclear	RT-PCR	787	TTGGCAAAGCTGATGACTTGGAAAGCATGTAAGGATGAAGATCACTTGTTGCTGCTTTACTTGTTATGTTGGTGAACAAGAAAATAATGATCCTGAAGAAAGAAGATTAATAACAGAAGATGAAGAAGAGCAAAGTGATGCTACTCATCAAGAACCAGAACCTGTCACTTCGCCTCCAGAGAAAAAAATCTGTGAGGTACATCGCTCACTCAGTAGTGTGAGCAGCAGTGGAACTGGAAGTCAGTCAAGTTTTGCGTCCTCCACATCTTCATTTAAGAGCACAATAAGAAGAGGAGATGTGAAACAGAGTACAAGGAAAGGAATCCCAAGCTTTGATGAGCGACAAGAAAGTGATGATATCTTCGATGAAGGCCCTGTGAGTCCAAGCAGTCGCTCATT…
KH.L164.21	KH.L164.21	KH2013:KH.L164.21	KH.L164.21	Cirobu.g00011689	4.15895	2.51355	9.6e-10	-2.34211	3.02e-07	0	https://www.aniseed.cnrs.fr/aniseed/gene/show_expression?unique_id=Cirobu.g00011689	https://www.aniseed.cnrs.fr/aniseed/gene/show_gene?unique_id=Cirobu.g00011689	http://ghost.zool.kyoto-u.ac.jp/cgi-bin/fordetailkh21.cgi?name=KH.L164.21;source=kh2013	Unclear	Twist BioScience	500	GTGGAAAAGCAATTGAAAATGTTTTCTGGGAACGAAGAAGGAAAAGGAAAAAGTGAAAATACCGAGGGGGAAAATAATTGTGCGGAGGATCAAACTCATATTGAAGAAATGCGGAAAGAAAAAAGAGAACAGATGCTGGAACAACAGCTGCAACGAAGAACCGAACGCGCGAAAATCCGCGAAGAAATCCGAAAACGACACAAAATCGAGTCGTCGGAAATCGACAGCGAACTAGTTAACCTTGAGAGTCATGGGGACACAGGAGATTCAAGTTTGGTAGAAATGGCTACGTCAATTAGTTCGCGACTAAAGCTGGTTTGGAGCAACTTTGGCAGCTCTGTGGGGAAATCTTAGTCAGCGATTATATTGTATTATAAAGTCGTATAATGTACAAGAGCA…
KH.S852.6	KH.S852.6	KH2013:KH.S852.6	KH.S852.6	Cirobu.g00015123	6.0835	3.10385	6.09e-07	-1.16021	0.0480169	0	https://www.aniseed.cnrs.fr/aniseed/gene/show_expression?unique_id=Cirobu.g00015123	https://www.aniseed.cnrs.fr/aniseed/gene/show_gene?unique_id=Cirobu.g00015123	http://ghost.zool.kyoto-u.ac.jp/cgi-bin/fordetailkh21.cgi?name=KH.S852.6;source=kh2013	Unclear	Twist BioScience	500	AATGGACGACAATGGCAAGCCAGAAGGCGACGGAAGAATGCGCCAACAATTTGCACAAGAACTCGCAGCGGATCGTCGATTTCGTGCATATGACGTCATCTCATAATTTTCTCGCGACTTCGGTTGCTGGATCGTCGGGAAGTTTAGAATTATATGGAGCGGAAATCCGGGGGAGGTTGGGATGTTTTCAATCCCTCATCATAAAAGAAGCTTTCGCTATTATGAAGACATTGTTGCCAGCGTTGCGATTGTTAAATAATTCTAAAGAGTCGCCGCAATCGAGCGATTTGCAGAAAGCGTTGGAATTACAATGGGTCGACTTTACTCTATGTCTTGAAATGTTCGGAAGTGACGTCAAAGTGTTATGGTTTCTAAACAATGCTTATAATACGGCAGGTG…
Kif26	KH.C11.185	KIF26B	KIF26A; KIF26B	Cirobu.g00001997	5.73539	2.60248	3.7e-11	-1.69685	1.72e-05	4	https://www.aniseed.cnrs.fr/aniseed/gene/show_expression?unique_id=Cirobu.g00001997	https://www.aniseed.cnrs.fr/aniseed/gene/show_gene?unique_id=Cirobu.g00001997	http://ghost.zool.kyoto-u.ac.jp/cgi-bin/fordetailkh21.cgi?name=KH.C11.185;source=kh2013	Unclear	RT-PCR	333	GGACGAAGCTTCAGAACCAGTGTGAGATCCAAGCAGAAACAGCTGAAAGGGCTGCGTATTTATTGGACGCTGCTTTGGCATCTAGGAGTTGCGCCGGGTCAAGGAATACTTCGGAAGCTCGAAAGCATTCACATGTTGTGTACACCCTACATATGTATCATCATAGGTCGGAAAACAACGACGGTAGATGTGGCGACAGAAGTCGTCTTCACTTCGTAGATCTTGGAAGCTGCGACAAAACTTTGATCAAAACTCCGAACGCTCTCGCCTTGTCGTTGACGTCACTCGGTCACGTGATCATGTCTATACTCAACAACTCTAAGCACGTCCCGT
Lzts	KH.C5.572	LZTS1/2	LZTS1; LZTS2; LZTS3	Cirobu.g00007471	5.93953	0.390893	0.25758	-0.739891	0.0335813	5	https://www.aniseed.cnrs.fr/aniseed/gene/show_expression?unique_id=Cirobu.g00007471	https://www.aniseed.cnrs.fr/aniseed/gene/show_gene?unique_id=Cirobu.g00007471	http://ghost.zool.kyoto-u.ac.jp/cgi-bin/fordetailkh21.cgi?name=KH.C5.572;source=kh2013	Unclear	Twist BioScience	500	TGAAACTAAAGCCAATTGCACTCTTTCGGACTATTACGCAATGCACGTCGAAAAACAATACAGAGAAACCTCCCTAAAACCAAAGCATGTTCCACTTAAAGTAGAACCTAATTCACCGTACGCTTCATTACTCAGTGAAAGCTCTGGCACTTTATCATCCGGAACTGTCCAGGAAAAACCGGAGTCTCGAATATCTCCAACCTGTACCCCACACACCACCGCCGAACCACCGAGGTTAGCACCTTCAGGAATGCTGTTGGCAGACAAGATCACTGACGGTAACATTATCCGACCTACTGCTTTCAAACCTCCAAAAAAGACGAAGAACTGGTTAGCGGTGACGCCAACGGAAAGTTCATTGGTGAGTTCTAGCAATCCTTGCCCGAGCAGTGTTGCCAG…
Mdga	KH.C3.474	KH2013:KH.C3.474_MDGA1/2	HSPG2; MDGA1; MDGA2	Cirobu.g00005658	4.96638	2.13798	0.0457694	-3.34917	0.00302941	0	https://www.aniseed.cnrs.fr/aniseed/gene/show_expression?unique_id=Cirobu.g00005658	https://www.aniseed.cnrs.fr/aniseed/gene/show_gene?unique_id=Cirobu.g00005658	http://ghost.zool.kyoto-u.ac.jp/cgi-bin/fordetailkh21.cgi?name=KH.C3.474;source=kh2013	Unclear	RT-PCR	998	CTGTAGCGACCGACATCAAACTGACGTGTCATGTAGACGCTGCTCCTTATTCTGAGCTTCAGTACGCTTGGTTTAAAAAGAATAGTGGCGGCGAAAGGGTGCGAATCACCGAGAGAAACTCAAGGGACAATATTTTTATAAGATTCCTGAACTCCGAAGAGAAAAAAAGAGGAATCACTTTTCCTGCTAAATCCAGCCAGCTTCAAATTCGGAGGTTGACTGAAGATGATTATGGAACTTACGTGTGTTCTGGTAAACTACCAACTCTTGGTCCCAATGGAGCCGAATCTTTCGCAGTTATTACTGTTAGTAGGGAATCAGCCCCAGCCAAAATAGAGGCAATCGAATCACGCGTGGTTGTAACAGAAGGTGATCCGGCTTCACTTAAATGCCGAACAA…
Mtcl1	KH.C1.396	ZGC:195224	AL096711.2; MTCL1; SOGA3	Cirobu.g00000632	7.34118	2.94157	0.000793676	-1.42246	0.087457	1	https://www.aniseed.cnrs.fr/aniseed/gene/show_expression?unique_id=Cirobu.g00000632	https://www.aniseed.cnrs.fr/aniseed/gene/show_gene?unique_id=Cirobu.g00000632	http://ghost.zool.kyoto-u.ac.jp/cgi-bin/fordetailkh21.cgi?name=KH.C1.396;source=kh2013	Unclear	Twist BioScience	500	ATGCAACGGATGCTGCTGTCATGTTATTGAATAGGATATACAACATACATGTTCTGGTCCAACACAAGCGTTAGCATGGCGGACACGACCATGCACTCGTGTTCTTGCGTTAGTGGTTGCCGGTGCTCGACACTGAACAAAGACACGGTGGATATGACGGCACGAAGCACAGACGGGACGATTGTTACTTACTCGAAAGATACAGACGAGGTGAAGTCACGCCCAGGCAGCCCGAAGATGGGAAAAGTTCGTTCGAATGTGACTAAACCAACGACCTCCGAATCCGATAATATAGCTGGGTGTTCTTTATTTAAATCTAAACCTGCTGTAGGAGGTAGGGTTAAAGAAGGTACGGCTTTTCATGTCCTGCAGCCGCACTCGCACAAGCGGCATTACCAG…
Nmur	KH.C5.614	KH2013:KH.C5.614_NMUR1/2	CCKBR; GHSR; NTSR1	Cirobu.g00007518	1.32491	2.59529	0.00364686	-7.11269	8.72e-05	0	https://www.aniseed.cnrs.fr/aniseed/gene/show_expression?unique_id=Cirobu.g00007518	https://www.aniseed.cnrs.fr/aniseed/gene/show_gene?unique_id=Cirobu.g00007518	http://ghost.zool.kyoto-u.ac.jp/cgi-bin/fordetailkh21.cgi?name=KH.C5.614;source=kh2013	Unclear	RT-PCR	1005	GGATGGGGAACTGCACTCTAAATGTTTCTATTTCGAATCCAACTGGTAAGTTAACTGTTTTTTTTATGCAGTTATATATACTTTAATTGCATGCCTATAGTTTACGAAATATTTAAACGTATAAAACGTGCAAACTGCAAACATATACTGTGGGGTAAGATGGGACACATTTAGCACACAATGTCCAAATATCCTGATCGTGTTTTAAACAATTACCAACGGTCTATATAAGTCGTGAGGATACGGTTTTATAATTCCTTGAATGTTTTTTGTTTACTATCACAAGAGACGAGAAAATAGAATAAAAAAGTGACCCATCTTCCCCCATCCTACTATACAACATATAATTAAACAAACAACATTTTTTGTAATGCAGGAGTTACCAGTGAGGTATCGAAC…
Notch-related	KH.L10.32	SI:CH211-69E5.1	NOTCH1; NOTCH2; NOTCH3	Cirobu.g00010523	2.94668	4.47616	0.00384492	-0.566495	0.684255	0	https://www.aniseed.cnrs.fr/aniseed/gene/show_expression?unique_id=Cirobu.g00010523	https://www.aniseed.cnrs.fr/aniseed/gene/show_gene?unique_id=Cirobu.g00010523	http://ghost.zool.kyoto-u.ac.jp/cgi-bin/fordetailkh21.cgi?name=KH.L10.32;source=kh2013	Unclear	Twist BioScience	500	TGTCTCAATGGTGCAACATGTATAGACGAACTTGCAGCATATCAGTGTACCTGTGTAGCAGGTTATAACGGGACAGACTGTGAGTATGAGGCGCCATGTAGTAGCAGCCCTTGTGAGAACAGCGGATCTTGTGAACAGATCAAAAAAAGCAACACTACTTCATACAGATGCTTGTGTAATATAGGATGGGCAGGAGTGAATTGTCAAACAGAAGTTTCTTCGGGCTGTTCCAATCCTCACGGTGGTGCTGGTTTCATCCCGTTCGGAGCGAGTCTGGAAATTTCATGTGAGGTCGGATTTGTGCTTACTGGATCAGAACGCGTCACGTGTTTAGACTCTGGCGATTTTGATGGACCAATTCCACAATGTATCCTAAATGGAACATCTCCGTCTGCGGTT…
Pirt-rel	KH.S514.6	PIRT	PIRT	Cirobu.g00014608	4.32776	1.04041	0.266764	-0.719681	0.439759	1	https://www.aniseed.cnrs.fr/aniseed/gene/show_expression?unique_id=Cirobu.g00014608	https://www.aniseed.cnrs.fr/aniseed/gene/show_gene?unique_id=Cirobu.g00014608	http://ghost.zool.kyoto-u.ac.jp/cgi-bin/fordetailkh21.cgi?name=KH.S514.6;source=kh2013	Unclear	Twist BioScience	500	TCCGTCTTTCTCCACCCTACTATATTTATCCGAAACATTCCCGCAACAGTGTGGAGTGACATTTACATTACAATTTGGTTTGAAACATATTGTTTTAACACCACACACAAACTGTTTAAGCCAAAGGACAATAACAGCAACAACAAACCACAACAACAACGTTCAACATCTAAAACAAGGCGACAGAATAGTCAGAATGTTGAGAGCAATAATGACGACCAAGTTGGAACAGCAGTAAATCACCAAAGGGCTCGAAAGAAGGTTTCCACACCACAACAATCTATCAAGAACGAATATTGCGTGACAACTAATTCCTCGATTTCTAATTTGACTACTAACTGTGAACGAGACTCACTGCTACGTCCGCACTCAAACACCGGTAACGGATCCGTGAAGACT…
Prox.a	KH.C4.500	KH2013:KH.C4.500_PROX1	PROX1; PROX2	Cirobu.g00006599	3.02704	0.329331	0.765174	-3.15992	0.00765635	0	https://www.aniseed.cnrs.fr/aniseed/gene/show_expression?unique_id=Cirobu.g00006599	https://www.aniseed.cnrs.fr/aniseed/gene/show_gene?unique_id=Cirobu.g00006599	http://ghost.zool.kyoto-u.ac.jp/cgi-bin/fordetailkh21.cgi?name=KH.C4.500;source=kh2013	Unclear	RT-PCR	1000	TAACGGCACATCACCATCATCGATGGCGCTAAGCCAGCCCGATGCAAAAACGATGAAAGAAACTACTCTTACGTCAGCAAGAGACTCTGAAAGTGAATTAGTTAAACAAAACATAGACGAAATTGTTAAAGCCGCGTCTTCCCCTAGTCAGTTCATCAGCCAAGCAATGAAACTAGTTGCAGCAGTTTCGGGTGCAGAAAAATCTTCTGTTGCTGGTACCGGGGAAAGTATGGCAGAGGGATGGGGACACCAGCAACCTAAGAGACAGTGCTTGGATACAGATGACGAGTTTGTCGATTCACCAATGAAAATTCAACCACGTTACCAGGCTGCGATCAAACTGAGCGTGACCGACGCTTTGAATGAAGATGAAGTAAATTCGTCGTACCAAATACTCGT…
Rxfp3	KH.C1.467	NPR-9	AGTR1; OPRM1; RXFP3	Cirobu.g00000709	5.82287	3.12629	0.00124967	-1.45038	0.112264	0	https://www.aniseed.cnrs.fr/aniseed/gene/show_expression?unique_id=Cirobu.g00000709	https://www.aniseed.cnrs.fr/aniseed/gene/show_gene?unique_id=Cirobu.g00000709	http://ghost.zool.kyoto-u.ac.jp/cgi-bin/fordetailkh21.cgi?name=KH.C1.467;source=kh2013	Unclear	Twist BioScience	500	GGAGGTCCTGGCCGGAACAGAAGAACGAGCATGTGGACATCAATGCGGCACACGACTACCACACGAATAAGAAACAGCACAGTAAGCCTTGGAAGAAAAAAGAGACCCAGCACGGCAATTGCAGCGGGCGGAAGAAACGAAAGAGAAGCTACTTCTCTTCGACCCGCAAGTCAGCCAATTTGGACACGAAAACAAAACGTTGTCGAAGACGTCAGGGCGGCACCTGCCGAAATGCCAGACGGCTTATTTCCAGACTACGATGACGACGACGAAGAAGATCACATTCATTTAAAACCGAGATGCGTGGGGCCACCAGTGACCAAGAGACGGATGAAAAACGGGTTTAACCAGCAGTTGGCAAAGAAACCTAAGAACCGTGGAATAACAGGTGTGAGCGAA…
Tacr	KH.L7.11	TACR1/2/3	TACR1; TACR2; TACR3	Cirobu.g00012972	4.03021	2.15917	0.00418638	-1.79358	0.0197934	2	https://www.aniseed.cnrs.fr/aniseed/gene/show_expression?unique_id=Cirobu.g00012972	https://www.aniseed.cnrs.fr/aniseed/gene/show_gene?unique_id=Cirobu.g00012972	http://ghost.zool.kyoto-u.ac.jp/cgi-bin/fordetailkh21.cgi?name=KH.L7.11;source=kh2013	Unclear	RT-PCR	999	TGACTGACGTCACAGCAACAACTGAAGATCACCACGAAGACGAAGAAAACCCGTTCGCCCAGAGCCCATACGCGATATTCGGTTGGTCAGTGGTGTATGGGTTACTAGTCGTTGTAGCTTTGGTGGGAAATCTTGGGATCTGCTGGATCGTCATCAGGAACAAACGAATGCAAACCGTCACCAACTTCTTCCTCGCCAGCACTGCGTTTGCGGACTCAAACGTGATCGGTTTCAACACCGTTTTTAACTTCACGTATGCTTTGAACAACGATTGGTATTTCGGGAAGGCGTTTTGTCATTTTATCAACTTTGTGCCGATCGGGGCGGTCCTTGCTAGCATCCTTTCTATCACTGTTATCAGTTTGGATCGCTTCGTCGTCATCATGTACCCGCTACGTA…
Tecta	KH.C14.256	KH2013:KH.C14.256_TECTA	GP2; TECTA; UMOD	Cirobu.g00003677	0.683733	0.665355	0.515004	-2.2434	0.0406921	0	https://www.aniseed.cnrs.fr/aniseed/gene/show_expression?unique_id=Cirobu.g00003677	https://www.aniseed.cnrs.fr/aniseed/gene/show_gene?unique_id=Cirobu.g00003677	http://ghost.zool.kyoto-u.ac.jp/cgi-bin/fordetailkh21.cgi?name=KH.C14.256;source=kh2013	Unclear	RT-PCR	1004	CCGAACTCGTCCGTTTACATTTCATGCGATGTTTTGAATAAGATCGTCGTAAACAGCACTTATCTGACATCGGTGAAAGTGGCCACCGTTGGAACATTGGCCTTCGTTTATTCTAATGGATCAGTAATAAATGAAGATTGTAGGCAGGCTGAGGCTAACGGTGGATATACTTTTCAAATGACAAAATTCGCACAGTGTGCATCTTCTGTTTCGACTAACGGAAACGAGTTGTCAGTACAATACCACCTATGCGTGGTACCTGCAGCGCCAACTGGCGGCGTAGTTATTTCAAGAGACACATCTACACTTTTTAAGTTCACGTGTAATTATAAAAGAGAAGTGGTGGCAAATATGACTCATATTAGACCTGTAATTGCCAAACTGAGAGGGACGCCGGTT…
TH	KH.C2.252	TH	PAH; TH; TPH2	Cirobu.g00004432	2.18876	2.44566	0.00766344	-1.27411	0.163997	16	https://www.aniseed.cnrs.fr/aniseed/gene/show_expression?unique_id=Cirobu.g00004432	https://www.aniseed.cnrs.fr/aniseed/gene/show_gene?unique_id=Cirobu.g00004432	http://ghost.zool.kyoto-u.ac.jp/cgi-bin/fordetailkh21.cgi?name=KH.C2.252;source=kh2013	Unclear	Twist BioScience	500	TTACAAACAGTGTCAGAGTTCCTAAAAGAACAAACTGGGTTCCAACTCCAACCTGCTCCCGGTATTATAACACCACGTGACTTCCTGGCAAGCTTGGCTTTCAAAGTCTTTCAATGTACGCAGTATATACGTCATCCAGCTTCGCCAATGCACTCTCCAGAACCGGATTGTTGCCACGAGCTTATAGGACACATACCGATGCTTCTAGACCCAACATTCGCACTGTATTCCCAGCAAATAGGTCTGGCCTCGCTGGGTGTAAGCGACAGCGACATTACTAAATTAGCTACGTTGTACTGGTTTACTGTTGAGTTCGGACTTTGTAAAGAGAACAATGTCTTGAAAGCGTACGGCGCTGGTCTTATGTCTTCGTACGGCGAGTTACAGCATGCGTTGAGT…
